# Supplementary material
Source: publisher figshare collection journal article supplement (https://acs.figshare.com/ndownloader/files/7595209)
Supplement: Supplementary file 1 [file 7595209]

## Sheet: Explanation
Supplementary reports (tissue): Report S2 Report S2. (Tissue-multiple worksheets) Original scaled data, pathway heat map (statistically significant biochemicals), box plots alphaphetical and box plots patways
	OrigScale		Values are normalized in terms of raw area counts.
			For a single day run, this is equivalent to the raw data.
	ScaledImpData		Each biochemical in OrigScale is rescaled to set the median equal to 1.
			Then, missing values are imputed with the minimum.
	Pathway Heat Map		This is the heat map associated with the statistical analysis of the data.
			Indicates ratios, p- and q-values for each comparison.
			0.55	Green: indicates significant difference (p≤0.05) between the groups shown, metabolite ratio of < 1.00
			0.76	Light Green: narrowly missed statistical cutoff for significance 0.05<p<0.10, metabolite ratio of < 1.00
			1.71	Red: indicates significant difference (p≤0.05) between the groups shown; metabolite ratio of ≥ 1.00
			1.32	Light Red: narrowly missed statistical cutoff for significance 0.05<p<0.10, metabolite ratio of ≥ 1.00
			1.2	Non-colored text and cell: mean values are not significantly different for that comparison
				Blue: indicates significant (p≤0.05) ANOVA effect.
				Light Blue: indicates 0.05<p<0.10 ANOVA effect
		* indicates compounds that have not been officially confirmed based on a standard, but we are confident in its identity
	Box Plots - Alpha		Box plots are provided for each biochemical detected, sorted alphabetically by biochemical name.
	Box Plots - Pathway		Box plots are provided for each biochemical detected, sorted by biochemical pathway.

## Sheet: OrigScale
												SAMPLE NAME	MICH-00330	MICH-00331	MICH-00332	MICH-00333	MICH-00334	MICH-00335	MICH-00336	MICH-00337	MICH-00338	MICH-00339	MICH-00340	MICH-00341	MICH-00342	MICH-00343	MICH-00344	MICH-00345	MICH-00346	MICH-00347	MICH-00348	MICH-00349	MICH-00350	MICH-00351	MICH-00352	MICH-00353	MICH-00354	MICH-00355	MICH-00356	MICH-00357	MICH-00358	MICH-00359	MICH-00360	MICH-00361	MICH-00362	MICH-00363	MICH-00364	MICH-00365	MICH-00366
												CLIENT IDENTIFIER	A1	A2	A3	A4	A5	A6	A7	A8	A9	A10	A11	A12	A13	A14	A15	A16	A17	A18	A19	B1	B2	B3	B4	B5	B6	B7	B8	B9	B10	B11	B12	B13	B14	B15	B16	B17	B18
												SAMPLE ID	2368936	2368976	2368937	2368977	2368938	2368978	2368939	2368979	2368940	2368980	2368941	2368981	2368942	2368983	2368943	2368984	2368945	2368985	2368946	2368947	2368986	2368948	2368987	2368949	2368988	2368950	2368989	2368951	2368990	2368952	2368992	2368954	2368993	2368955	2368994	2368956	2368995
												PARENT SAMPLE ID	2289403	2289404	2289405	2289406	2289407	2289408	2289409	2289410	2289411	2289412	2289413	2289414	2289415	2289416	2289417	2289418	2289419	2289420	2289421	2289422	2289423	2289424	2289425	2289426	2289427	2289428	2289429	2289430	2289431	2289432	2289433	2289434	2289435	2289436	2289437	2289438	2289439
												LC COLUMN	1	1	2	2	1	1	2	2	1	1	2	2	1	2	2	1	2	2	1	2	1	1	2	2	1	1	2	2	1	1	1	1	2	2	1	1	2
												MATCHED PAIRING	1	2	3	4	5	6	7	8	9	10	11	12	13	14	15	16	17	18	19	1	2	3	4	5	6	7	8	9	10	11	12	13	14	15	16	17	18
												RUN DAY	1	2	1	2	1	2	1	2	1	2	1	2	1	2	1	2	1	2	1	1	2	1	2	1	2	1	2	1	2	1	2	1	2	1	2	1	2
												EMPTY TUBE WEIGHT MG	2130	2100	2110	2110	2110	2130	2130	2110	2120	2130	2110	2120	2120	2130	2140	2130	2130	2120	2130	2130	2130	2110	2120	2120	2120	2110	2120	2110	2090	2120	2120	2090	2120	2120	2130	2110	2130
												SAMPLE WEIGHT MG	45.4	44.2	45	43.2	43.7	44.2	42.5	43.8	48.9	48.3	44.6	42.7	43	49.7	44.8	49.7	45.2	45.7	47.2	36.2	43.6	42	43.8	41	43.3	46.8	42.6	45.5	46.1	44.5	49.1	49.4	47.3	50.5	44.5	48.2	50.2
												GROUP	A	A	A	A	A	A	A	A	A	A	A	A	A	A	A	A	A	A	A	B	B	B	B	B	B	B	B	B	B	B	B	B	B	B	B	B	B
												GROUP DESCRIPTION	Benign	Benign	Benign	Benign	Benign	Benign	Benign	Benign	Benign	Benign	Benign	Benign	Benign	Benign	Benign	Benign	Benign	Benign	Benign	Indolent	Indolent	Indolent	Indolent	Indolent	Indolent	Indolent	Indolent	Indolent	Indolent	Indolent	Indolent	Indolent	Indolent	Indolent	Indolent	Indolent	Indolent
PATHWAY SORTORDER	BIOCHEMICAL	SUPER PATHWAY	SUB PATHWAY	COMP ID	PLATFORM	CHEMICAL ID	RI	MASS	CAS	PUBCHEM	KEGG	Group HMDB	Control	Control	Control	Control	Control	Control	Control	Control	Control	Control	Control	Control	Control	Control	Control	Control	Control	Control	Control	Primary	Primary	Primary	Primary	Primary	Primary	Primary	Primary	Primary	Primary	Primary	Primary	Primary	Primary	Primary	Primary	Primary	Primary
1432	1,2-dipalmitoyl-GPC (16:0/16:0)	Lipid	Phospholipid Metabolism	19130	LC/MS Polar	100000657	830	778.56	63-89-8	452110		HMDB00564	1.90645e+06	2.37963e+06	1964334	1194959	2068565	881580	1.37311e+06	2273327	1.26707e+06	1.25679e+06	1.39834e+06	2.41463e+06	1.12057e+06	928466	1.09124e+06	949759	872847	1.29729e+06	2.21041e+06	2.95458e+06	2.48441e+06	1.8824e+06	2295735	3.22158e+06	2021825	2.23383e+06	3.22341e+06	3213276	3.01866e+06	2.6353e+06	1930216	2.25424e+06	4.66309e+06	2.02356e+06	2.21959e+06	2.45151e+06	2.10122e+06
3415	1,2-propanediol	Xenobiotics	Chemical	38002	GC/MS	100001176	1041	117	57-55-6	1030	C00583	HMDB01881	1466819	1.86033e+06	1.91236e+06	1736277	2.03771e+06	5.38887e+06	2.02509e+06	7222317	5.52352e+06	2.01819e+06	2.0357e+06	2.66969e+06	2734212	1.28129e+06	1.93952e+06	12935585	8.26676e+06	1.94291e+06	1.51139e+06	1.44919e+06	1.99977e+06	1.83142e+06	1.13852e+06	2.63378e+06	5.17604e+06	1860151	5787171	3630051	1.69396e+06	2.01129e+06	2.30981e+06	2.11747e+06	1.55406e+06	2.12993e+06	10668168	7.51345e+06	2.11307e+06
2743	1,3,7-trimethylurate	Xenobiotics	Xanthine Metabolism	34404	LC/MS Neg	100001397	1985	209.068	5415-44-1	79437	C16361	HMDB02123
2740	1,3-dimethylurate	Xenobiotics	Xanthine Metabolism	32391	LC/MS Neg	100001106	1671.4	195.052	944-73-0	70346		HMDB01857
793	1,5-anhydroglucitol (1,5-AG)	Carbohydrate	Glycolysis, Gluconeogenesis, and Pyruvate Metabolism	20675	LC/MS Neg	100000580	802	163.061	154-58-5	64960	C07326	HMDB02712	32563446	49274632	39417272	43020972	27739714	34381884	43478788	31241730	35896264	38132140	36961796	59841944	29200114	22872194	37624996	23904632	36921776	41610524	21596910	32867504	40562108	37062696	34028144	27534548	34077384	43323592	26644280	24968092	45192856	37882068	53659496	26410580	16317408	36523732	20349112	28406160	30714404
2741	1,7-dimethylurate	Xenobiotics	Xanthine Metabolism	34400	LC/MS Neg	100001399	1578.6	195.052	33868-03-0	91611	C16356	HMDB11103
1506	1-(1-enyl-oleoyl)-GPE (P-18:1)*	Lipid	Lysolipid	44621	LC/MS Neg	100005372	6250	462.299					41773352	38571448	44827372	37231760	42602248	67358760	51180652	25465236	19977874	272323168	18921474	52188220	32884184	27482766	29736156	35740216	12266231	59208592	20972988	29265084	60070536	53079044	32275928	107042992	103879408	32230304	22875588	28393596	33915052	41357584	104502120	65419304	68859456	26831106	72596808	30548846	27699826
1460	1-(1-enyl-palmitoyl)-GPC (P-16:0)*	Lipid	Phospholipid Metabolism	52474	LC/MS Neg	100002875	6300	554.346		10917802			6.91274e+06	3.2104e+06	6513825	6744835	39875576	53197816	11191402	332351	8236313	7.38017e+06	11452803	4883568	37249520	381385	309489	8832621	1562440	18322156		2568061	24961426	7190537	4331010	4580564	14994965	7032322	3.21348e+06	12284796	4243625	3753773	65575012	7114913	2.62467e+06	2604018	6580398	4463635
1504	1-(1-enyl-palmitoyl)-GPE (P-16:0)*	Lipid	Lysolipid	39270	LC/MS Neg	100003000	6285	436.283					58369440	73544680	92815976	58280312	114678712	142133904	118671544	58214556	74128784	232990928	64965680	70341752	80308216	26153684	54768228	53045132	40188404	168494304	22733042	123059128	147599344	134471872	78336984	301689408	135307952	65710852	91096848	220485152	91447376	69250320	155431392	148164016	239674224	74794080	124320568	102095808	84885576
1452	1-(1-enyl-stearoyl)-2-arachidonoyl-GPE (P-18:0/20:4)*	Lipid	Phospholipid Metabolism	52475	LC/MS Polar	100008999	753	750.544					2.3376e+06	4.15057e+06	2.7378e+06	2679791	2447881	2.22824e+06	2.94865e+06	2699080	2.28074e+06	2.11093e+06	2.31127e+06	5.48804e+06	2.30733e+06	1.2784e+06	1.555e+06	2055839	1639269	1.58495e+06	2446662	2.95631e+06	3129063	2.9805e+06	1.8118e+06	2328924	2.93218e+06	2.39816e+06	1.98639e+06	2323456	3.10003e+06	2.06371e+06	2326190	1.73875e+06	3.60558e+06	2.50032e+06	2.08787e+06	1.9939e+06	839059
1505	1-(1-enyl-stearoyl)-GPE (P-18:0)*	Lipid	Lysolipid	39271	LC/MS Neg	100003001	6500	464.315					33398900	22827714	54900744	31086484	54726520	44217004	60013308	28778928	34023116	49988992	21871914	22274974	46960000	15115438	14779548	11572567	7533674	31583534	26573642	23351770	60132752	68731904	31545808	43503492	45935116	39906612	27017628	19722986	28671420	29692720	54245932	38303472	48445576	28456012	32813328	28273510	14330708
1493	1-arachidonoyl-GPC (20:4)*	Lipid	Lysolipid	34061	LC/MS Neg	100001551	6074	618.341			C05208	HMDB10395	9998424	9531166	12313196	16362292	17969562	13862599	12185645	14397035	9686664	25435376	10794277	6.92416e+06	14507990	4353970	6516672	11254994	10332338	12134389	5.37739e+06	26535572	96938824	18641870	28395258	19698432	62923864	15693276	62920772	23686836	22987022	26457598	16300979	39308328	35119444	24392904	41246260	14307661	5193381
1522	1-arachidonoyl-GPE (20:4)*	Lipid	Lysolipid	35186	LC/MS Neg	100001571	5874	500.278		42607465		HMDB11517	29865222	27810046	34841908	26933324	35586336	26741900	36431528	22916448	26041036	34150020	31290904	34298860	24035064	15746579	24224786	21316736	20890888	25189710	22635610	40119972	71510592	26341732	37368596	39193936	57031080	27671884	44237656	37368008	47675204	40046772	24658062	46509024	44081488	31966274	43826384	31261884	16752799
1543	1-arachidonoyl-GPI (20:4)*	Lipid	Lysolipid	34214	LC/MS Neg	100001654	5482	619.289				HMDB61690	8646513	6477543	17399440	16286196	42240448	19308404	14430422	8515109	12596432	21888616	9943497	7561984	15055508	3.6474e+06	20493454	9139140	8591444	27100184	22067138	28139938	63572328	25545954	47446872	30627960	53473800	42066652	46402860	36091708	29400852	49547304	20661030	37539252	43528268	44523548	43640360	16957704	17457594
1615	1-arachidonylglycerol (20:4)	Lipid	Monoacylglycerol	34397	LC/MS Neg	100001433	6450	303.233	35474-99-8	5282281	C13857	HMDB11572		12806633	5.82266e+06	8890135	6.81764e+06	5.47847e+06	3709130	19985358	3.65678e+06	36735360	2265107	8594431	7529841	9760153	2.27792e+06	17449180	2965363	12928116	16050390	15917151	145188240	20462986	43987456	19675180	109154056	26936556	26635566	28704820	69853768	34737536	38920644	69944424	66629796	16932566	20462986	41613304	5.23426e+06
1622	1-dihomo-linolenylglycerol (alpha, gamma)	Lipid	Monoacylglycerol	48341	LC/MS Neg	100006121	6220	305.249					3578947	4.565e+06	3.80831e+06	2.51971e+06	1.94765e+06	1.94075e+06	1.74182e+06	6.71828e+06	1.76268e+06	9468737	1.59476e+06	6031092	1.05801e+06	2.88571e+06	4.00923e+06	3.62679e+06	2776222	4.89172e+06	2253057	15019988	41174876	4523930	22919136	17506372	19642906	7292261	10108048	56295424	28301320	4.73706e+06	10747873	10180605	27337082	13168687	5074246	11871082	5394463
1620	1-docosahexaenoylglycerol (22:6)	Lipid	Monoacylglycerol	35153	LC/MS Neg	100001481	6150	309.222				HMDB11587	1.96112e+06	4910558	3177293	5.09875e+06	1.91916e+06	2297820	527190	5148107	1.01989e+06	13343014	1.0451e+06	1668214	1.82757e+06	1.7692e+06	1.61708e+06	4823736	1325977	6.44466e+06	7539691	7.8539e+06	143092656	10021087	19856346	8873193	27196942	9022266	12656213	16002936	14665834	11418994	7.41072e+06	24802616	44122484	8.24602e+06	13545904	10550994	4.25535e+06
1481	1-linoleoyl-GPC (18:2)	Lipid	Lysolipid	34419	LC/MS Pos	100001395	5575.9	520.34		11988421	C04100	HMDB10386	2651185	6.50454e+06	1.08608e+06	1.94774e+06	2086451		3.09022e+06	2.17778e+06	1.76816e+06	1.86035e+06	2.45704e+06	4.04496e+06	896017	1.94895e+06	6.15653e+06	2198787	2.08914e+06	3.31805e+06	1.41141e+06	1.06283e+06	4318610	3430624	3.23821e+06	6330135	3.27907e+06	2.09055e+06	5.6229e+06	2.08443e+06	2.67773e+06	4.28782e+06	1.40688e+06	6.815e+06	8578092	3.29621e+06	16193400	3.42634e+06	1.03251e+06
1518	1-linoleoyl-GPE (18:2)*	Lipid	Lysolipid	32635	LC/MS Neg	100001570	5900	476.278		52925130		HMDB11507	16364323	15842608	14882651	7.87296e+06	15648160	14339884	28517966	11140858	15499180	22931892	13797118	17637500	10410939	9010650	20669384	9522112	8165012	27100504	7.85489e+06	11581023	28107218	17230334	13479504	25316402	19881632	7.97104e+06	13932865	6.76631e+06	9641082	19091372	8069626	27904278	33032896	8093529	70275864	15129303	23679614
1539	1-linoleoyl-GPI (18:2)*	Lipid	Lysolipid	36594	LC/MS Neg	100001778	5494	595.289					2.19569e+06	970477	3004104	1381915	5126155	3.02988e+06	2.87819e+06	1.2537e+06	4.01895e+06	9794515	2.07434e+06	1645766	1.55669e+06	448727	9856369	2862039	1.4037e+06	7031831	3136359	2.71857e+06	5.711e+06	5846499	3.90813e+06	7549820	5.92567e+06	4.1298e+06	3.61139e+06	3.73731e+06	2.15618e+06	8605595	2.88674e+06	8599113	6.20346e+06	3.74548e+06	27631638	2.0671e+06	8702569
1612	1-linoleoylglycerol (18:2)	Lipid	Monoacylglycerol	27447	LC/MS Neg	100001040	6477	279.233	2277-28-3	5283469			20876890	39775952	21396296	35024072	23544984	22928530	15374012	66884212	12821310	158956512	16935824	27905348	26487212	26833786	23787014	45595916	18093386	87568568	53295788	79800056	256198992	58997956	93543472	140550080	105648048	62440780	67117768	58853688	103475640	109527416	53308560	177024080	237268928	38031212	84428304	92054080	49127152
1548	1-linoleoylglycerophosphoserine*	Lipid	Lysolipid	43676	LC/MS Neg	100004606	5500	520.268						550893		252516	1.73883e+06	1.28692e+06	893055	854076		3.92801e+06	497957	718310			1.78182e+06	1.40533e+06		2718528	910289	1.04116e+06	6.65481e+06	2355295	2.50112e+06	8307758	4506661	1.70211e+06	4.08181e+06	1.70266e+06	1.9475e+06	7.286e+06	1.76824e+06	7673170	9686658	1298608	15032275	3687644	5052403
66	1-methylhistamine	Amino Acid	Histidine Metabolism	43831	LC/MS Pos	100001204	585.5	126.103	501-75-7	3614	C05127	HMDB00898	8845153	20003790	37901428	51120808	64082872	9372214	30656938	15346096	38196420	37160956	36420484	23787108	26565226	22092476	62182188	27157730	21159556	55723536	15331383	155299744	75882304	36337284	131152056	26223024	108299880	84940384	149654192	181448640	122618504	46505504	10956269	14029252	1.69816e+06	102721256	14872503	20319942	6216937
55	1-methylhistidine	Amino Acid	Histidine Metabolism	30460	LC/MS Neg	100001051	1227	168.078	332-80-9	92105	C01152	HMDB00001				101692	148278	64450.1	77082.2		90037.8		101243	74669.5	225380			89007.1	49019.8			162025	331081	329130	234101	391207	219938	221774	182871	129032	124660	201156	152419	426909	291713	106425	505753	277235	529174
70	1-methylimidazoleacetate	Amino Acid	Histidine Metabolism	32350	LC/MS Pos	100001208	833	141.066	2625-49-2	75810	C05828	HMDB02820	21019778	19771542	10449818	11013704	18258910	1.7314e+06	5.97545e+06	17758358	9502222	9072327	6944497	8695914	5.79449e+06	10064246	3.34855e+06	1.14672e+06	559970	3020767	2.12916e+06	3.33918e+06	3200290	1.03605e+06	3.62236e+06	1787252	2.21086e+06	3229879	1.58582e+06	15236997	3.82281e+06	1829789	1694422	1095087	994507	2.46378e+06	901220	471745	1.14598e+06
2581	1-methylnicotinamide	Cofactors and Vitamins	Nicotinate and Nicotinamide Metabolism	27665	LC/MS Pos	55	691.3	137.071	1005-24-9	10129985	C02918	HMDB00699	2895342	6.59623e+06	6.73126e+06	5.73671e+06	29060934	22004588	11971949	17231846	7.84353e+06	6282392	7952661	7357569	14647502	15033902	7100039	3253790	4.5301e+06	26535818	33047792	35124232	31745154	35635924	37871720	63641668	44909644	34023132	32312554	40824088	54811308	25463114	12527821	67625304	77455336	33860572	47196264	28946598	23822466
2738	1-methylurate	Xenobiotics	Xanthine Metabolism	34395	LC/MS Pos	100001400	1860.5	183.051	708-79-2	69726	C16359	HMDB03099
1601	1-myristoylglycerol (14:0)	Lipid	Monoacylglycerol	35625	LC/MS Neg	100001618	6353.3	227.202	75685-84-6	79050	C01885	HMDB11561	2.24118e+06	5330753	4.95299e+06	4708329	3.18404e+06	3.88568e+06	4130706	3.29799e+06	3.7747e+06	6754570	2581429	4.96996e+06	2.80972e+06	2.78798e+06	3.99311e+06	2.69422e+06	3.55051e+06	4539756	3.06898e+06	13284120	27549478	6.03461e+06	6.49819e+06	9954872	6097773	6160938	7.01878e+06	19715080	9608336	5.62793e+06	7.11987e+06	5.25789e+06	10195927	8234032	4277032	4.34455e+06	2.38672e+06
1478	1-oleoyl-GPC (18:1)	Lipid	Lysolipid	48258	LC/MS Pos	100001272	5700	522.355	19420-56-5	16081932		HMDB02815	2.64346e+06	5708107	1.56322e+06	1419468	2847479	1.11908e+06	3.06974e+06	2.59928e+06	2.07973e+06	1.24914e+06	1.98216e+06	4853617	1.06574e+06	3.06963e+06	7.16944e+06	2139270	2.34142e+06	4.03196e+06	2236863	2.25001e+06	7917234	7895488	3.86112e+06	19980668	5471976	5.78625e+06	5.69453e+06	6039976	4.6735e+06	3780348	4171601	13340139	22332490	5154291	13697070	4362032	1.46542e+06
1514	1-oleoyl-GPE (18:1)	Lipid	Lysolipid	35628	LC/MS Neg	100001569	6125.1	478.294	89576-29-4	9547071		HMDB11506	89421872	46695032	109165544	32721172	63262172	40832308	144815552	42533452	28813982	68166448	40076444	57170828	57184124	57789928	109223232	16865092	31998670	85767704	52628572	55663244	93984776	55570500	47125708	133346096	116592984	33832932	46375332	50844768	57181492	66998276	50809460	109463872	87076216	40288136	116009648	31680572	60863108
1561	1-oleoyl-GPG (18:1)*	Lipid	Lysolipid	45968	LC/MS Neg	100005716	5610	509.288					12579279	14429961	17016342	7959600	35623172	14340042	23574974	19469858	23630660	43400300	27180212	12294733	12080319	4216191	15585731	11008802	9396012	25408456	15879193	26909564	44634672	21578616	24733644	39270808	29980636	43002920	27038456	25228666	35292808	32806028	33737320	36388484	53565224	23657136	26188942	16427070	18995598
1537	1-oleoyl-GPI (18:1)*	Lipid	Lysolipid	36602	LC/MS Neg	100001777	5599	597.305					4.67943e+06	3.30161e+06	6.71985e+06	2781761	11664241	4762849	7621065	2402835	6696039	13907588	5.56954e+06	4305634	4504391	2707737	9270257	3.8051e+06	3.19748e+06	9918051	5246381	12093628	20493972	18268718	12381826	25813764	22922500	12670024	9687173	17148164	13045695	14398068	12753508	17739492	21208670	19752190	33664104	6.29591e+06	14340278
1546	1-oleoyl-GPS (18:1)	Lipid	Lysolipid	19260	LC/MS Neg	100000630	5607	522.284		9547099			564045	2819480		3.40057e+06	5678692	2594474	7.11264e+06	4.32143e+06	7.14511e+06	5634971	6132545	13782706	3.90287e+06	2.29132e+06	5.02671e+06	5607787	1.90413e+06	6.46545e+06	6518323	9924783	19057218	16207255	10535848	21756546	35410372	11030323	12376493	20672566	11613288	20181152	17045232	26121336	19547940	10657949	27154434	10117960	10264455
1610	1-oleoylglycerol (18:1)	Lipid	Monoacylglycerol	21184	LC/MS Pos	100000924	5820.4	374.326	111-03-5	5283468		HMDB11567	1.99955e+06	2547164	1.86086e+06	2.8637e+06	3.23194e+06	2.2926e+06	2.20137e+06	3520098	1.94479e+06	3.63495e+06	1.69371e+06	5632871	2.22188e+06	2260600	2.27296e+06	4.17089e+06	1.84672e+06	4932427	3.12173e+06	4686323	19434004	7.05219e+06	6.35189e+06	17286286	6399695	6209897	6.12824e+06	11096407	10829971	3.74954e+06	5.77818e+06	7.30666e+06	24429734	3891699	4621135	5.21635e+06	2.07989e+06
1472	1-palmitoleoyl-GPC (16:1)*	Lipid	Lysolipid	47117	LC/MS Neg	100001511	5794	568.326		24779461		HMDB10383	4.1111e+06	3.35453e+06	3.71616e+06	2.26037e+06	4.66908e+06	5989533	4.23648e+06	2.18571e+06	3.41932e+06	5082788	3.89384e+06	3.78688e+06	2504681	1.63529e+06	4634315	4.41594e+06	4591578	5252513	1.65009e+06	11095558	26500010	10616498	9591807	26857210	14388805	5.16228e+06	9340119	26092554	8.09986e+06	10698294	12152546	18084868	16802132	6608496	40297000	13537687	24950850
1625	1-palmitoleoylglycerol (16:1)*	Lipid	Monoacylglycerol	52431	LC/MS Neg	100008952	6094	253.217					7063095	14921540	5.25811e+06	3.4169e+06	6.45271e+06	10056342	4.52309e+06	3.28891e+06	4.56008e+06	15403016	5123209	8557903	5153775	1.39744e+06	1.88618e+06	11725092	5.93478e+06	9986712	4601031	36991388	160444656	15296408	20167582	30476566	24363634	15431722	11314444	98883624	26714862	25381104	36092680	30859236	30756164	14293503	14082101	24228282	14096191
1435	1-palmitoyl-2-arachidonoyl-GPC (16:0/20:4)*	Lipid	Phospholipid Metabolism	52459	LC/MS Polar	100008914	870	826.56	35418-58-7	10747814			10265615	6.37875e+06	9581411	5.34131e+06	6571117	3794534	6.21008e+06	10071464	6.31785e+06	7125467	5.74945e+06	5235419	5.16111e+06	6.57135e+06	5629073	4.89556e+06	4862882	4739061	5.31952e+06	8871511	8724525	2.73836e+06	6913321	3860925	8692803	3422613	12849633	7291022	6233152	7968397	3.42372e+06	5125627	3.63118e+06	5947303	4622947	5200242	2.46922e+06
1461	1-palmitoyl-2-arachidonoyl-GPE (16:0/20:4)*	Lipid	Phospholipid Metabolism	52464	LC/MS Polar	100008990	758	738.508					1.41069e+06	1.36889e+06	1.40993e+06	499217	572228		709992	1183764	500654	680934	411701	981010	165736	685615	905608	452906	375895	457820	513676	1175536	1.26504e+06	445168	686948	739023	624040	491991	1.37117e+06	1.24007e+06	566894	741134	295916	579940	1.47832e+06	492872	795968	803976	438819
1446	1-palmitoyl-2-arachidonoyl-GPI (16:0/20:4)*	Lipid	Phospholipid Metabolism	52467	LC/MS Polar	100008993	892	857.519					887872	376126	703474	150360	254620	55859.6	174105	387168	182376	399502	208036	303789	78879.5	281466	338681	136061	87881	140869	216941	237546	201239	254098	223941	134528	243393	306977	367450	290596	251118	280958	219127	305639	279025	138182	161297	444657	160521
1439	1-palmitoyl-2-palmitoleoyl-GPC (16:0/16:1)*	Lipid	Phospholipid Metabolism	52470	LC/MS Polar	100008984	872	776.545					845108	1118291	625716	649605	1.05851e+06	624079	380414	483290	1.20485e+06	453798	757737	1.00614e+06	453544	346736	450768	699078	608484	584826	321787	1.71226e+06	1.38284e+06	916387	1.32132e+06	1.63551e+06	997215	947882	924514	3.64886e+06	1.11633e+06	1.72948e+06	2.26388e+06	1.23751e+06	1.64634e+06	757459	1074901	2.53659e+06	2.24935e+06
1470	1-palmitoyl-GPC (16:0)	Lipid	Lysolipid	33955	LC/MS Pos	100001263	5670	496.34	17364-16-8	86554		HMDB10382	28258760	38308740	20093332	13637480	13992113	11618503	16394917	17184880	13707312	18339960	13076030	37017756	6.1354e+06	31085112	60902032	14967505	17306190	23600368	10875247	9187048	26032460	24333934	20475142	63078516	40414348	22531248	35898052	48680824	25047944	14731293	12852090	44708764	86789656	18810180	24804894	21868852	3938784
1509	1-palmitoyl-GPE (16:0)	Lipid	Lysolipid	35631	LC/MS Neg	100001567	6057.2	452.278		9547069		HMDB11503	113678344	47991292	120655104	26818994	35470020	22791254	99767280	37976392	26193424	73623824	25687800	24186040	29488762	54642660	103937144	10856288	14676600	48202360	31706304	29291916	38741012	30261568	29283652	75216480	42492144	26182906	35661640	65455128	26924826	39463192	21014832	65392420	49751728	18941636	37759592	32577770	22874422
1556	1-palmitoyl-GPG (16:0)*	Lipid	Lysolipid	45970	LC/MS Neg	100005717	5570	483.273		3300276			4858996	5039366	6.79882e+06	6.45218e+06	10728088	9397724	11370551	6411261	8618739	9057854	5158408	3.70586e+06	7.48802e+06	3.58635e+06	3.56579e+06	5.72687e+06	3.90307e+06	17838750	4.06557e+06	6.95964e+06	14225659	7.11745e+06	6.64577e+06	20535268	9803404	7841902	7849810	9388325	7818213	7.88403e+06	7.85216e+06	13012298	17144432	4435252	9995072	19196368	7684879
1532	1-palmitoyl-GPI (16:0)*	Lipid	Lysolipid	35305	LC/MS Neg	100001655	5564	571.289				HMDB61695	12382743	4.7173e+06	18491354	1.95157e+06	6.52521e+06	2.60557e+06	4.93314e+06	4.20085e+06	6013941	34046044	4898113	2.89351e+06	2687095	3.31742e+06	12670764	4.93482e+06	2.2649e+06	4886595	3.11885e+06	11975581	10648445	27594490	7889222	27722778	21071840	16278732	12924245	43914160	16148608	9057763	6.38967e+06	21120370	18739614	8933168	25655742	15743953	11734762
1558	1-palmitoyl-GPS (16:0)*	Lipid	Lysolipid	46130	LC/MS Neg	100005805	5572	496.268		9547100				471774			540752		1.6903e+06	1.18115e+06	514411			753774						702547			1.86803e+06		777638	2111396	1.59607e+06	629523	763169	608029	736097	1.12247e+06	1.65827e+06	1.40644e+06			1.76667e+06	343570	531969
1605	1-palmitoylglycerol (16:0)	Lipid	Monoacylglycerol	21127	LC/MS Neg	100000827	6400	255.233	542-44-9	14900		HMDB31074	54630680	72047112	78635760	60071000	66232596	81973952	36906080	106085944	37847584	185315392	37278536	47211204	60129024	36529864	64331472	57627200	48888724	83999320	58632512	262804176	917087360	199333088	142138912	207062032	192353888	110470240	210266368	320276640	278862784	157963232	95485752	125923376	167716864	132425776	67006872	67098676	36533352
1430	1-stearoyl-2-arachidonoyl-GPC (18:0/20:4)	Lipid	Phospholipid Metabolism	42450	LC/MS Polar	100001869	850	854.591	35418-59-8	16219824			2.8796e+06	2.87983e+06	2.70635e+06	1.84484e+06	1.48278e+06	1.17088e+06	2.98225e+06	2.23544e+06	2.33268e+06	1.6764e+06	2.48055e+06	2.59942e+06	942426	2303895	1.70337e+06	1.37704e+06	1.71451e+06	1.46575e+06	3.5609e+06	3.78747e+06	3212445	1393851	3035895	2.28285e+06	3.01399e+06	3.61303e+06	2.80992e+06	2.66294e+06	3891843	3.20227e+06	1.90624e+06	2.52751e+06	1.05883e+06	3.45616e+06	1.79983e+06	1416285	787644
1457	1-stearoyl-2-arachidonoyl-GPE (18:0/20:4)*	Lipid	Phospholipid Metabolism	52447	LC/MS Polar	100008977	756	766.539					2.45675e+06	3.14045e+06	2.46307e+06	2178050	1.89064e+06	2.16425e+06	2.00306e+06	2.3764e+06	1.16689e+06	1.33716e+06	1.53148e+06	2.70266e+06	2302067	1.14289e+06	1.37089e+06	2431523	2252148	1.49242e+06	1949799	4227358	4668125	1.76116e+06	2.10572e+06	2.40621e+06	2707099	2.51774e+06	2.91104e+06	2.47517e+06	3.89298e+06	2.82839e+06	2.09426e+06	1.93317e+06	4092339	2.52962e+06	2.0053e+06	2.28766e+06	550792
1443	1-stearoyl-2-arachidonoyl-GPI (18:0/20:4)*	Lipid	Phospholipid Metabolism	52449	LC/MS Polar	100000616	870	885.549					2.53738e+06	1.71271e+06	2.00952e+06	1.53994e+06	1.59495e+06	1.08343e+06	1.00606e+06	2.05539e+06	839991	940658	1.38736e+06	1.9981e+06	1.53566e+06	1151320	1.10822e+06	1.06591e+06	1.19473e+06	775318	1938670	2.14194e+06	1695377	1.41643e+06	1.42769e+06	735701	1.47942e+06	2.20667e+06	2.19681e+06	1.21117e+06	1.50329e+06	2.5667e+06	1.54358e+06	1.3692e+06	2.08656e+06	1.47146e+06	1.06009e+06	1.52366e+06	533065
1433	1-stearoyl-2-oleoyl-GPC (18:0/18:1)	Lipid	Phospholipid Metabolism	52438	LC/MS Polar	100008904	830	832.607	56421-10-4				1.12835e+06	1.17999e+06	968980	730433	1.23256e+06	627304	1.14149e+06	897533	725540	997259	1.0824e+06	1.37103e+06	1.0468e+06	929865	1.02143e+06	728837	1.00024e+06	934098	2.33733e+06	1.29337e+06	1.37268e+06	2.52715e+06	1.09964e+06	2.14258e+06	987497	1.79096e+06	865514	897099	1.46221e+06	1.00763e+06	1.34856e+06	1.64188e+06	2.61919e+06	1.35498e+06	1.06832e+06	1.66409e+06	1.49314e+06
1459	1-stearoyl-2-oleoyl-GPE (18:0/18:1)	Lipid	Phospholipid Metabolism	42448	LC/MS Polar	100001856	750	744.555					165739	325664	235472		211055		309553	299852	226048	180169		475286		108640	339269		160057	170481	338347	543276	709488	1.12255e+06	249236	656376	156616	375933	273477	252266	302019	415390	572788	326014	1688801	429702	506350	420705	411027
1476	1-stearoyl-GPC (18:0)	Lipid	Lysolipid	33961	LC/MS Pos	100001271	5847	524.371	19420-57-6	497299		HMDB10384	6353817	13148743	5276547	5145306	3.62262e+06	3.51705e+06	4956457	4837207	4.12387e+06	5045389	4.47944e+06	10156840	1.60833e+06	9600781	11731305	3.64436e+06	3.73246e+06	6.99286e+06	3.25523e+06	3.08982e+06	11173132	8706002	8714709	23182836	14196645	6508352	8.36814e+06	10323421	12700413	4633776	4.7275e+06	12136655	37459412	6773663	7.35794e+06	5.72903e+06	610837
1512	1-stearoyl-GPE (18:0)	Lipid	Lysolipid	42398	LC/MS Neg	100001461	6514	480.31	69747-55-3	9547068		HMDB11130	192463936	72137512	241010464	156115264	202093312	184375904	303413440	107742912	61913024	68087464	82100952	37562376	220991856	65366480	41671480	32195860	50382736	116466936	46787216	58353380	134046432	72760192	47148088	123004928	77683600	60368476	45323848	62091372	92269216	95909440	34254636	165042048	75837808	67999488	55583848	64465132	22364024
1559	1-stearoyl-GPG (18:0)	Lipid	Lysolipid	34437	LC/MS Neg	100001462	5816	511.304					1.16799e+06	2.46064e+06	2.95249e+06	1.87798e+06	5.43002e+06	2967492	6965041	1.79008e+06	7047763	4.53845e+06	2.15022e+06	1.19707e+06	2.65747e+06	751684	1.28428e+06	1.74973e+06	985552	7.9477e+06	2.29846e+06	4.15687e+06	8071778	4.73549e+06	2.93244e+06	5546000	4858408	4532939	2431389	2923326	5.97778e+06	3.76002e+06	3908665	4.87975e+06	9945056	2712391	2.9576e+06	2.96178e+06	1.38943e+06
1535	1-stearoyl-GPI (18:0)	Lipid	Lysolipid	19324	LC/MS Neg	100000656	5794.3	599.32	796963-93-4			HMDB61696	47739360	19590170	92986968	15872350	53115140	38994512	38179504	27416506	36079476	81277440	38942908	8243711	34415756	11887976	52316244	14376908	21462102	23404806	41803088	107958904	123759752	179090768	55364324	102592680	92202704	97506920	79835960	162441104	136034544	83293992	34466588	78630360	82209016	107534944	111935240	55658724	33062330
1545	1-stearoyl-GPS (18:0)*	Lipid	Lysolipid	45966	LC/MS Neg	100004327	5800	524.299		9547101			9837182	8614460	16007155	7.08685e+06	15551009	8.30654e+06	32663210	14511471	10045250	10322090	14217529	6.7635e+06	13166703	5.13874e+06	8585118	2.87527e+06	3907848	12106886	12787966	22557728	41589184	27708852	11573051	24222846	22613532	18675630	17118900	26687226	29833190	25238406	12505025	21299648	27176026	13841497	17851806	11474740	10831918
1608	1-stearoylglycerol (18:0)	Lipid	Monoacylglycerol	21188	GC/MS	100000932	2186.6	399.4	123-94-4;31566-31-1	24699	D01947	HMDB31075	55613.6	107939	138122	88657.9	87075.1	80922.1	64953.8	160420	52218.1	155853	46643.2	75497.5	52582.3	79247.9	67403.1	41232.4	51618.7	56709.6	65946.4	198767	271174	190446	122757	190906	137284	158826	172911	252053	217097	173557	103932	176480	182191	151584	144046	176000	110051
1021	10-heptadecenoate (17:1n7)	Lipid	Long Chain Fatty Acid	33971	LC/MS Neg	100001278	5555	267.233	29743-97-3	5312435		HMDB60038	96074288	89796600	106357448	71976464	59280340	71864064	49088440	76150808	89468664	127713312	99750312	76516576	42361640	29066452	49175240	94939496	35832564	82864928	45886832	325069952	261930400	170743616	86662088	109301912	95538040	64295848	114661264	72974256	250381984	140795408	61962072	93892768	143537088	62475948	91680720	32635440	68677424
1031	10-nonadecenoate (19:1n9)	Lipid	Long Chain Fatty Acid	33972	LC/MS Neg	100001277	5780	295.264	73033-09-7	5312513		HMDB13622	48179736	36707648	58124728	35386132	43390076	39072888	27660604	55298764	32632680	101081832	44020584	28380270	26599832	17024650	25323240	27408446	13953329	38354924	45261844	242890640	312041440	172744640	68944504	101996088	86916056	58845080	98531184	53030956	227603504	90126856	63444624	72739880	133287120	68621472	66444920	15246712	36414640
1284	13-HODE + 9-HODE	Lipid	Fatty Acid, Monohydroxy	37752	LC/MS Neg	100002196	5275	295.228		43013			15702814	17239714	54577140	16943472	12011150	8.1515e+06	33497086	30571952	43373212	13563024	26470622	15715858	7911996	11896673	104373640	63863600	6.35437e+06	31410382	18805644	22649196	11293349	8472801	7701363	7760413	12005560	27492242	23300062	13465598	14465603	73917888	10981311	6.53834e+06	5.12399e+06	4.09341e+06	16510210	4.66662e+06	10410093
1118	15-methylpalmitate (isobar with 2-methylpalmitate)	Lipid	Fatty Acid, Branched	38768	LC/MS Neg	100002945	5695	269.249		17903417			80967112	68078608	18338348	59265256	58041864	47717852	54403224	44413800	105549088	100109144	36939880	52997780	34328948	24363612	47898604	93692392	42222956	51592820	59959716	185336160	222650880	129438960	53642632	55713584	88216064	89264232	47846556	67049500	83447320	81229976	99842656	65009992	133321864	87452584	70187608	37740792	37935584
1767	16a-hydroxy DHEA 3-sulfate	Lipid	Steroid	38168	LC/MS Neg	100002126	4240	383.153						745834	407171	92993.1	1.03277e+06	875465	95192.9	452024		278165		195639	1.24164e+06	152434	49598.4	605735	83764.6	676365	95868.9					397171	726338				331447			328890			248929		39430.6
1121	17-methylstearate	Lipid	Fatty Acid, Branched	38296	LC/MS Neg	100002356	5993	297.28	2724-59-6	3083779			6.15381e+06	9042966	7.92972e+06	5.57065e+06	5994046	3.63835e+06	4.42207e+06	5.18052e+06	8715943	13305168	8600800	5.19439e+06	2.73264e+06	3.94436e+06	4.05888e+06	18724352	4070965	5.18389e+06	12298151	21608732	59524740	22697112	7.43118e+06	8625384	12015179	16177539	8004027	11105541	21046232	10589153	29634070	7.62653e+06	25119654	16553300	13828949	6.28894e+06	7117114
2501	2'-deoxyguanosine	Nucleotide	Purine Metabolism, Guanine containing	1411	LC/MS Neg	348	1751	266.089	961-07-9	187790	C00330	HMDB00085		188661	166413		443002	164261		230447	237545		182884	165082	286352		174789	53262.9		295491	140332	864991	1.07813e+06	173077	389869	299720	465565	452261	402925	2.2419e+06	199510	551052	303973	373578	2.44076e+06	489644	505928	333560	262309
2436	2'-deoxyinosine	Nucleotide	Purine Metabolism, (Hypo)Xanthine/Inosine containing	15076	LC/MS Neg	100000135	1688	251.079	890-38-0	65058	C05512	HMDB00071	220398	418001	387608	505194	1.83303e+06	848927	295098	508869	446165	291174	515788	375546	905018	422952	1.21097e+06	173690	255244	1.04692e+06	683252	3.22488e+06	5.9405e+06	1.33758e+06	2.05189e+06	1.1312e+06	1.79876e+06	1.58547e+06	992167	4286893	389160	798196	1201132	1.15354e+06	9877852	2.33167e+06	2.00578e+06	918196	1551143
79	2-aminoadipate	Amino Acid	Lysine Metabolism	6146	LC/MS Pos	381	793.3	162.076	542-32-5;1118-90-7	469	C00956	HMDB00510	12594448	19858386	17264264	20120748	115793328	7798519	71086792	44819120	120711592	37384012	88198048	42456836	55409056	9243864	34806688	105279400	18487784	47295792	12573725	14297468	15962447	28035656	14687744	24822080	23299416	38399440	16563662	19468796	23089932	34142832	9047289	18948716	19448024	41412044	15445378	17107644	21789090
305	2-aminobutyrate	Amino Acid	Methionine, Cysteine, SAM and Taurine Metabolism	42374	LC/MS Polar	1128	2451.5	102.056	1492-24-6	439691	C02261	HMDB00650	249230	361790	416762	239709	554982	512572	363346	395729	771473	231346	363957	175667	468509	55903.5	427046	919788	484982	818184		425230	807997	606804	724750	713883	742943	1111924	953267	934095	314521	767523	419053	572895	99943.9	913624	1.34729e+06	1306351	1.8445e+06
1185	2-aminoheptanoate	Lipid	Fatty Acid, Amino	43761	LC/MS Pos	100004542	2530	146.118	1115-90-8	227939				960555	2.78544e+06	804467	12188502	6032595			2.98765e+06	3.86498e+06	1.00719e+06		8.06772e+06	1.33685e+06		8843432	3.32707e+06	13189058		9572165	29041066	15223229	8657710	22115422	20847554	9989427	24720970	7328908	7.46598e+06	8.1176e+06	9780796	26767994	72516496	28028420	27869772	13188310	20267770
1190	2-aminooctanoate	Lipid	Fatty Acid, Amino	43343	LC/MS Pos	100004227	3355	160.133	644-90-6	69522		HMDB00991				999146	722995	815660	888248		675334		1.3563e+06	1.4171e+06	585937		884471	1.02465e+06	1302359			548542	1.61929e+06	3.28005e+06	1.23377e+06	1.17722e+06	1.37095e+06	1.53181e+06	807265			1.49904e+06	2.91531e+06	1.024e+06	3.18027e+06	829400	1.23375e+06	1.85821e+06	1.04389e+06
3442	2-aminophenol sulfate	Xenobiotics	Chemical	43266	LC/MS Neg	100004322	1677	188.002		181670		HMDB61116		72800.1		51665									66812	115337	67028.3				117859				43894.1									34235.9
1616	2-arachidonoylglycerol (20:4)	Lipid	Monoacylglycerol	19266	LC/MS Neg	100000584	6170	303.233	53847-30-6	5282280	C13856	HMDB04666	1.34016e+06	4.75847e+06	1929463		3.45118e+06	2.00137e+06	1346862	2.18046e+06	2.10086e+06	9191730		1.62494e+06	4435355	885199		5.98268e+06	2.1209e+06	1092233	3651917	3.65549e+06	24793544	4867110	5087701	7425673	19309362	8496460	2.94711e+06	6369697	10348391	6.02162e+06	6420702	21734704	20827716	6138833	4715592	21740748	1.61989e+06
275	2-hydroxy-3-methylvalerate	Amino Acid	Leucine, Isoleucine and Valine Metabolism	36746	LC/MS Neg	100001541	1800	131.071	488-15-3	164623		HMDB00317	495175	525723	1.44702e+06	918486	2950570	3.29469e+06	1213166	1.29218e+06	4.06656e+06	516569	2.67895e+06	1.14302e+06	2.39879e+06	3.62736e+06	1.69666e+06	3083362	1.24603e+06	1551368	2.59088e+06	497913	3.12401e+06	1.49328e+06	1.07756e+06	6.9376e+06	3.5526e+06	1.36075e+06	1.31616e+06	5.0436e+06	1.33761e+06	880895	2.28019e+06	1.4447e+06	3.94e+06	3177520	2.50126e+06	5.06184e+06	32019628
3155	2-hydroxyacetaminophen sulfate*	Xenobiotics	Drug	33173	LC/MS Neg	100001791	1674	246.008																					1704301																			878228
306	2-hydroxybutyrate (AHB)	Amino Acid	Methionine, Cysteine, SAM and Taurine Metabolism	21044	LC/MS Polar	100000933	1258	103.04	3347-90-8	440864	C05984	HMDB00008	8677602	13960407	6195907	11516030	24949496	22105722	10667575	15107902	19063922	6769603	12391627	15237953	23921150	6.29982e+06	15550250	26521846	12956942	22909366	6.98341e+06	8425305	13777170	10122290	13882364	19388904	25914480	18660340	12896067	13610478	7.61497e+06	17890788	35060684	21268822	7603803	21303896	28788198	40606728	24710268
1132	2-hydroxyglutarate	Lipid	Fatty Acid, Dicarboxylate	37253	LC/MS Neg	100002070	600	147.03	40951-21-1	43	C02630	HMDB00606	20179136	18965390	30479776	14826562	29919906	22454404	18940844	21641378	22870134	33505542	16391016	17744686	41052892	39308788	32281160	28294134	21562374	24503704	30992908	33188816	37404852	23903404	20263490	30814504	31985470	26346126	30647140	34111660	13651939	35552656	50006112	25357066	73809328	34166044	45656416	74609408	81451328
1257	2-hydroxyoctanoate	Lipid	Fatty Acid, Monohydroxy	22036	LC/MS Neg	100000743	3736.8	159.103	617-73-2	94180		HMDB02264		2.26863e+06	588180	288189	339584	276977	310813				355595		276977	215235	163162	167772	186937		197099	504615	670494	187251		175121		456226			142861		240654
1260	2-hydroxypalmitate	Lipid	Fatty Acid, Monohydroxy	35675	LC/MS Neg	100001579	5511.2	271.228	764-67-0	92836		HMDB31057	82084616	79943336	101804688	51266860	104384592	42277408	96281008	123415744	56860132	157259216	84799480	74605088	52916548	53607860	79108256	191658000	64759168	168380048	108440552	109326512	47869524	119909712	86469240	149123296	96294192	282024416	88889704	314931264	203096416	77917008	114759720	86937872	41649228	100644608	80058648	165451664	222949216
1613	2-linoleoylglycerol (18:2)	Lipid	Monoacylglycerol	32506	LC/MS Neg	100000987	6250	279.233	3443-82-1	5365676		HMDB11538	8689945	10098625	9641993	3502216	14002566	11490268	5.18775e+06	8142025	6257479	42193556	4.58158e+06	4.29918e+06	17870050	4860675	5089914	24532284	6406125	14441173	18270366	17091410	55672136	18502456	13770522	50408704	29826870	28070330	12467816	10772356	18386412	30393508	18483708	88230312	112800808	10998217	28259962	61040424	16727684
3156	2-methoxyacetaminophen sulfate*	Xenobiotics	Drug	47031	LC/MS Neg	100001793	1949	260.023																					1288941																			551444
270	2-methylbutyrylcarnitine (C5)	Amino Acid	Leucine, Isoleucine and Valine Metabolism	45095	LC/MS Pos	100001509	2465	246.17	31023-25-3	6426901		HMDB00378	11128905	8347961	17857720	18078576	27109426	43665736	11311674	6978011	22835226	12129879	18917162	16695785	46956852	10368608	12315480	42568504	13053810	32885862	18282878	12447667	17573690	6.37596e+06	7482532	20129330	18340126	31915064	15044852	7.32084e+06	17798676	66812512	16444978	20085990	40180712	17289662	28534554	13092724	35730088
996	2-methylcitrate	Energy	TCA Cycle	37483	LC/MS Neg	90	575	205.035	6061-96-7	439681	C02225	HMDB00379	412944	1.01414e+06	577753	730522	1427637	835994	1.25306e+06	769791	849953	835142	1006441	1260100	1.35888e+06	863748	1.10776e+06	4.12145e+06	898801	1.19229e+06	711932	1070899	2.00216e+06	1.01383e+06	995055	1.5158e+06	1.67002e+06	2.77547e+06	3.46707e+06	1.27727e+06	1.21575e+06	1.4295e+06	1.25766e+06	1.06949e+06	10726435	996206	7.0646e+06	944678	2.27554e+06
1611	2-oleoylglycerol (18:1)	Lipid	Monoacylglycerol	21232	LC/MS Neg	100000943	6950	281.249	3443-84-3	5319879			5866144	13949333	10061066	8921327	19353216	28536336	4.43419e+06	16463938	6889728	37992552	4.78757e+06	8164028	21030418	9366810	8308775	28325528	18583890	30705120	17336514	44877108	212982320	34264256	53064800	146151824	79188064	38513928	40879040	53894792	67500168	19603720	59109496	80400272	285375328	43244156	41271228	63680492	43070452
1473	2-palmitoleoyl-GPC (16:1)*	Lipid	Lysolipid	35819	LC/MS Pos	100001561	5490	494.324						1493972		771177	817318				666321		812168	2081695			639812	1.0455e+06	1642302	982878		1262000	1.64112e+06	1.59754e+06	1.86276e+06	3.90723e+06	1.33788e+06	1.07359e+06	1.73395e+06	6.03955e+06	641512	793011	4.10803e+06	2.89889e+06	5558744	1.63296e+06	5163278	3.64099e+06	2.75877e+06
1626	2-palmitoleoylglycerol (16:1)*	Lipid	Monoacylglycerol	52432	LC/MS Neg	100008953	6016	253.217					1.47826e+06	2.5604e+06	2.20075e+06	513453	2496190	4.11902e+06	726233	572723	2.02087e+06	3286921	2448193	1.72198e+06	2.74532e+06	1.21753e+06		3.81734e+06	2.82104e+06	3399118		4906042		2.03384e+06	2.75213e+06	10451787	5024096	3.136e+06	4925677		1.03631e+06	3.43784e+06	5.83446e+06	7.69239e+06	18761472	3.00312e+06	1.96281e+06	7241936	4.7854e+06
1471	2-palmitoyl-GPC (16:0)*	Lipid	Lysolipid	35253	LC/MS Pos	100001562	5610	496.34		15061532		HMDB61702	2.53499e+06	6861212	1330792	1.35158e+06	1.75483e+06	778526	1.56488e+06	2.34185e+06	1.1663e+06	1.32911e+06	1.69454e+06	5920220	268211	2.67945e+06	4.76787e+06	1.99826e+06	1.83824e+06	2.25244e+06	1.55186e+06	1.46499e+06	4.68942e+06	3.16916e+06	3.35715e+06	7.14855e+06	5375073	3.11856e+06	5.73392e+06	4.2548e+06	4318191	2.49404e+06	2.93246e+06	6131711	24106120	3.43167e+06	10471426	2.51303e+06	1331612
1606	2-palmitoylglycerol (16:0)	Lipid	Monoacylglycerol	33419	LC/MS Neg	100001048	6628.9	255.233	23470-00-0	123409		HMDB11533	10173913	19342602	14665335	25923066	25808300	52320512	9827762	42523676	6844701	45157728	7.59313e+06	13733635	31462768	15444685	17973854	43922012	24423862	55885992	20910906	103182008	541207424	71825976	100797912	116237608	116728232	50806460	121805168	96039424	118689056	39452672	54862452	60349140	296116768	69317592	42256200	23628994	34717716
809	2-phosphoglycerate	Carbohydrate	Glycolysis, Gluconeogenesis, and Pyruvate Metabolism	35629	GC/MS	100000093	1734	459.1	70195-25-4	59	C00631	HMDB03391	55399	177602	122930	175925	52787.6	110287	64210.2	179989	204577	80416.2	170316	47814.4	212559	13302.3	32237.1	173292	136649	68082.4	20798.2	106657	19592.5	118153		54965.2	68397.8	76078.8	39076.3	145259	150033	40881.7		36728.6		45266.6	39949.5	12755.8	11426
2760	2-piperidinone	Xenobiotics	Food Component/Plant	43400	LC/MS Pos	100004295	2047	100.076	675-20-7	12665																																	301271808
1513	2-stearoyl-GPE (18:0)*	Lipid	Lysolipid	41220	LC/MS Neg	100003901	6350	480.31					19192220	8041425	19484856	13926122	14517394	16234606	26453594	6.31128e+06	4.84364e+06	40701288	7619249	4.88023e+06	9045344	8.17689e+06	4384246	4971711	5.22027e+06	13774236	12049274	5.10926e+06	8510168	10170409	4805271	12020686	10341860	8569083	4.82945e+06	7.36419e+06	9899421	15088918	4.79784e+06	16894460	7.21291e+06	4719292	14512033	8911244	1.85269e+06
2597	3'-dephosphocoenzyme A	Cofactors and Vitamins	Pantothenate and CoA Metabolism	18289	LC/MS Neg	100000138	2013	686.142	3633-59-8	444485	C00882	HMDB01373					181384	352106							435573			461062	501154							989620							471596	880676	3.45322e+06	316594	700551	1399612	2.33972e+06
121	3-(4-hydroxyphenyl)lactate	Amino Acid	Phenylalanine and Tyrosine Metabolism	32197	LC/MS Neg	240	1379	181.051	6482-98-0	9378	C03672	HMDB00755	6364986	23337488	17966308	14568431	25260410	21086740	15396639	19225548	28202554	14763845	25095282	12449931	23669794	15142820	11553718	28315070	15788177	15283895	15768947	29932454	20315204	18961048	18421030	18590278	24018830	30975794	55454560	134323024	130308368	40101976	28438116	20489340	17347094	20843602	30629680	12825955	15285370
172	3-(4-hydroxyphenyl)propionate	Amino Acid	Phenylalanine and Tyrosine Metabolism	39587	LC/MS Neg	100002914	1670	165.056	501-97-3	10394	C01744	HMDB02199			1.1913e+06	261753	253547	243799	86595.8	205424	1154277		434519		282831		354948	4.37474e+06	95366.5	569390		194181		584576	39761.8	4174043	334620		375276	1.18061e+06			734402	410868		56249.7	375531		919342
2563	3-aminoisobutyrate	Nucleotide	Pyrimidine Metabolism, Thymine containing	1566	GC/MS	1114	1252.2	102	10569-72-9;214139-20-5	64956	C05145	HMDB03911	138388	1309514	413453	831908	1.52942e+06	370196	680575	411816	1.84131e+06	237070	607930	1.64605e+06	855174	177016	202922	1.76976e+06	738804	958141	128315	314393	796988	1.28211e+06	701506	3.67201e+06	1.0678e+06	1.87832e+06	4213098	347929	456772	1.31635e+06	478288	3.25119e+06	539674	363019	1.75141e+06	4.51398e+06	2.14316e+06
1154	3-carboxy-4-methyl-5-propyl-2-furanpropanoate (CMPF)	Lipid	Fatty Acid, Dicarboxylate	31787	LC/MS Neg	100001178	2840	239.092	86879-39-2	123979		HMDB61112	6.46926e+06	24166898	10686502	49553860	23822942	1135183	3.32551e+06	10723168	8899995	2335055	12297975	2321076	20080078	4970929	9784708	10349838	4.8206e+06	27358928	6248588	6.36505e+06	6163600	3977113	30624652	8934801	1180138	1.40086e+06	4174120	2.38995e+06	2668751	4501838	686970	7.97204e+06	2709999	7010689	7.00242e+06	2106281	10234456
276	3-hydroxy-2-ethylpropionate	Amino Acid	Leucine, Isoleucine and Valine Metabolism	32397	LC/MS Neg	100001170	975	117.056	4374-62-3	188979		HMDB00396	590136	982226	841988	984242	1.95027e+06	1.51532e+06	973805	485578	1.38482e+06	838664	1116371	1.17238e+06	1.56949e+06	865085	1.2635e+06	1.08028e+06	684262	653281	1.20232e+06	913685	970570	672408	1.09241e+06	1.26534e+06	1.79433e+06	1187584	88169.4	1.27555e+06	1.02176e+06	928021	822668	994679	602578	1.33779e+06	1.2195e+06	805575	722258
1663	3-hydroxy-3-methylglutarate	Lipid	Mevalonate Metabolism	531	LC/MS Neg	112	621.1	161.046	503-49-1	1662	C03761	HMDB00355	1.02049e+06	3.78801e+06	2.4583e+06	3.01726e+06	4703335	623323	3.74749e+06	4.30167e+06	3.31881e+06	2.25433e+06	3.37348e+06	4.37673e+06	2696787	3.66434e+06	2170940	6.38808e+06	2.31057e+06	3747557	4.19299e+06	9166994	10375764	7.02946e+06	7.04749e+06	6660050	5.9443e+06	7.84629e+06	11890364	7534601	6.39116e+06	9231128	11176407	6.35608e+06	7.47106e+06	8194277	20128778	8564125	9667198
1253	3-hydroxybutyrate (BHBA)	Lipid	Ketone Bodies	542	LC/MS Polar	254	1443.3	103.04	625-72-9	441	C01089	HMDB00357	11150258	2962607	24414514	16721572	32855136	38794800	34837968	89329520	12124227	3.73051e+06	20233456	25580416	37662064	5.20209e+06	33328854	30940970	50048860	37919072	20284684	14249732	4136506	26746320	19323362	92258320	48459960	34712696	81093792	8201670	5613954	20265178	28668034	72540744	6818335	47133424	36676984	48917964	28213282
1265	3-hydroxydecanoate	Lipid	Fatty Acid, Monohydroxy	22053	LC/MS Neg	100000997	4634.7	187.134	5561-87-5	26612		HMDB02203	1.20152e+06	2.18849e+06	2.0094e+06	2.57629e+06	6.42668e+06	2.24267e+06	4.79912e+06	3.75589e+06	2.80572e+06	1.81915e+06	2844648	3.18194e+06	3.72013e+06	2.4287e+06	2497805	2.46117e+06	5.14642e+06	4.34542e+06	12030287	3.07135e+06	2041969	2.34038e+06	4140104	2.63769e+06	3.95172e+06	4307440	3.53891e+06	12205813	4.27408e+06	2.41371e+06	5155547	2.17788e+06	1.96561e+06	6.31972e+06	3.59875e+06	2.95402e+06	5049791
2863	3-hydroxyindolin-2-one	Xenobiotics	Food Component/Plant	42561	LC/MS Pos	100003823	2645	132.044	61-71-2	6097	C11130		928137	263243	411518	1.23915e+06	1015000	142992	2485488	1.5373e+06	1451450	279486	537833		1324148		851849	476164		2.14508e+06		988361		139761	1.78482e+06	1430609		2909621	1.50173e+06	1505169	567830	673610		1295645	187799	1111991	470330		2.30235e+06
284	3-hydroxyisobutyrate	Amino Acid	Leucine, Isoleucine and Valine Metabolism	1549	LC/MS Polar	111	1619.1	103.04	2068-83-9	87	C06001	HMDB00336	1364901	3279286	2.46792e+06	3564092	4921918	2.64475e+06	3.23328e+06	2.7646e+06	2.85478e+06	990300	3.32374e+06	5.41343e+06	3682004	3.14842e+06	5.3662e+06	3.00058e+06	3.7859e+06	4068571	3.13157e+06	1.0169e+06	1705464	1.40518e+06	1.89162e+06	3949327	2.68479e+06	2.76007e+06	2.82106e+06	1.59461e+06	1.05677e+06	2.31107e+06	1.31904e+06	1.79838e+06	1.06992e+06	4.81592e+06	2740960	1.36004e+06	2.3054e+06
1267	3-hydroxylaurate	Lipid	Fatty Acid, Monohydroxy	32457	LC/MS Neg	100001112	5175	215.165	53941-38-1	94216		HMDB00387	2.21894e+06	3.68636e+06	3.74466e+06	3.78148e+06	10386418	4.74322e+06	9267054	6.97272e+06	4.6769e+06	3745785	4.56602e+06	5421939	6084585	4.07589e+06	4782037	3.84664e+06	8761375	6.57805e+06	28448894	7.50689e+06	5051242	6.294e+06	11952801	7274803	7648660	7313363	7916874	19576046	7331921	5333425	10377530	4828080	3.94898e+06	16335649	5461748	5.50371e+06	11070374
1264	3-hydroxyoctanoate	Lipid	Fatty Acid, Monohydroxy	22001	LC/MS Neg	100000773	3446	159.103	88930-08-9	26613		HMDB01954	432469	2.08752e+06	1238677	1.66601e+06	3.79533e+06	1.43586e+06	2.60262e+06	2.73679e+06	1.45503e+06	1.36734e+06	1.61577e+06	2.04777e+06	2.30865e+06	1409666	1.53156e+06	1.55451e+06	2639589	3707327	5812822	1.62944e+06	1.1636e+06	1.32052e+06	1.78766e+06	2.03551e+06	2.3503e+06	3.32417e+06	2.25028e+06	7.61433e+06	2906391	1062275	2172079	1.2989e+06	1.38623e+06	3.64252e+06	2.78214e+06	1.76319e+06	4.86986e+06
202	3-indoxyl sulfate	Amino Acid	Tryptophan Metabolism	27672	LC/MS Neg	100000467	2222.2	212.002	2642-37-7	10258		HMDB00682	5.55058e+06	9492158	2.08599e+06	25963240	10688155	1760523	20315658	8500671	6982158	8081819	3.79874e+06	2.60037e+06	8941378	2.97332e+06	4.26342e+06	2.30476e+06	1.64154e+06	5.7272e+06	1.64356e+06	5352911	3.08099e+06	1027221	23130902	4.52874e+06	1.81249e+06	9321977	3.12603e+06	1.59164e+06	4206820	1.36588e+06	895377	4.08589e+06	1710633	2.49613e+06	1.63724e+06	1.15592e+06	3.89205e+06
160	3-iodotyrosine	Amino Acid	Phenylalanine and Tyrosine Metabolism	18300	LC/MS Neg	100000456	2056	305.963	70-78-0	439744	C02515	HMDB00021																																3308661
141	3-methoxytyrosine	Amino Acid	Phenylalanine and Tyrosine Metabolism	12017	LC/MS Pos	1342	1771	212.092	300-48-1	1670		HMDB01434		154794	170914	199559	547304		221890	350603	237672	308211	184814	242337	407181	100592	108526	380582	216523	323569		422216	559146	997245	355226	738390	363656	413054	658197	260874	632500		426594	753181	407990	312562	734133	850612	1.13171e+06
281	3-methyl-2-oxobutyrate	Amino Acid	Leucine, Isoleucine and Valine Metabolism	44526	LC/MS Neg	100000936	1465	115.04	3715-29-5	49	C00141	HMDB00019	3.5876e+06	931086	1.74607e+06	4.02661e+06	8.28133e+06	1.31371e+06	3.9998e+06	2865338	493726		1213941	9189216	8840419	7634844	3071274	2141279	2634705	3.24193e+06	944940		773836	786400	625527	467993			398309				839412			796842	837396		1.10444e+06
269	3-methyl-2-oxovalerate	Amino Acid	Leucine, Isoleucine and Valine Metabolism	15676	LC/MS Neg	100000036	2064.2	129.056	1460-34-0;51829-07-3	47	C00671	HMDB03736	8988685	2953028	3.04473e+06	21502904	32388080	3551618	20998860	1283429	4731954	975897	1778784	31727738	37511456	24162232	6248715	6970202	5.69419e+06	15580565	2.54164e+06	665155	1.0435e+06	1248874	1210285	751586	1.18316e+06	904318	859507	721622	713650	811140	3.25353e+06	864120	1235864	1.3024e+06	2.3009e+06	856673	4.41621e+06
84	3-methylglutarylcarnitine (1)	Amino Acid	Lysine Metabolism	46547	LC/MS Pos	100005849	1870	290.16		128145		HMDB00552		297158	247538	247649	1952357	971134	587817	471496	476139	256411	412069	695800	1.75512e+06	5816380	392966	597015	255282	690025	7.53312e+06					1.36186e+06	702080	350667		92229.8	442552		305313	1.07584e+06	2.24215e+06	457024		125102	380174
56	3-methylhistidine	Amino Acid	Histidine Metabolism	15677	LC/MS Neg	100000042	906.3	168.078	368-16-1	64969	C01152	HMDB00479	128452	419406	118474	2.27212e+06	1.17464e+06	344891	677566	638908	1.06565e+06	416322	1.25194e+06	639505	1.43719e+06	1.0987e+06	319228	2.72202e+06	202182	362412	349648	243220	683447	417380	3494807	1.43434e+06	681132	1.08297e+06	1.43159e+06	855692	872096	1.5077e+06	817096	1.51683e+06	3327831	558206	3.79676e+06	510758	833489
2745	3-methylxanthine	Xenobiotics	Xanthine Metabolism	32445	LC/MS Neg	100001108	1700	165.042	1076-22-8	70639	C16357	HMDB01886
810	3-phosphoglycerate	Carbohydrate	Glycolysis, Gluconeogenesis, and Pyruvate Metabolism	1414	LC/MS Neg	132	583	184.986	80731-10-8	724	C00597	HMDB00807	80072784	217499872	103149608	190988576	35224456	73098336	58955984	164899920	167845296	69014808	126284776	87737376	124071624	28320784	29594404	218805568	103802440	91645264	16835944	61737736	17762732	74949616	23725124	29083258	54553540	45268860	40246660	87523664	177493056	25249206	26424542	26447794	3.39946e+06	30420408	24121730	8859826	10820574
3160	4-acetamidophenol	Xenobiotics	Drug	12032	LC/MS Neg	1383	2173.7	150.056	103-90-2	1983	C06804	HMDB01859			25814.4					81842.8						348571			187744320	3389482	251797								83263.3				70483.3	29509.6	308937			115445928	2.33288e+06
3161	4-acetamidophenylglucuronide	Xenobiotics	Drug	15736	LC/MS Neg	100000043	1400	326.088	120595-80-4	83944		HMDB10316																	3451497																			1365480
3159	4-acetaminophen sulfate	Xenobiotics	Drug	37475	LC/MS Neg	2049	1792	230.013	10066-90-7;32113-41-0	83939	C06804	HMDB59911																	410806	270056																		218583	167110
1782	4-androsten-3beta,17beta-diol disulfate (1)	Lipid	Steroid	37202	LC/MS Neg	100001992	3740	224.062		10634	C04295	HMDB03818	1.16798e+06	2.61564e+06	16400289	4086375	23770654	17288024	6.16596e+06	2.88586e+06	2.76804e+06	2.76605e+06	11030953	5.42704e+06	24510126	11032142	1.99893e+06	7.76303e+06	7.36673e+06	6.91626e+06	9005382	1.10241e+06	814680	4.87793e+06	2.4361e+06	10737204	21400316	2.88218e+06	1.56212e+06	622209	3.21718e+06	3.97686e+06	1.59702e+06	11367866	4312956	1.62909e+06	6068424	3.57917e+06	3.62452e+06
1783	4-androsten-3beta,17beta-diol disulfate (2)	Lipid	Steroid	37203	LC/MS Neg	100001994	4065	224.062		10634	C04295	HMDB03818		998014	1.22583e+06	1.10158e+06	6.46309e+06	777436	1.96673e+06	685444	392496	643231	759291	1.47025e+06	7.41994e+06			1.06103e+06	1.57799e+06	1.45864e+06	655669	692277	123967		333511	2.68704e+06	1149729	203552	221739		905113			2.32648e+06		463543	503795	318239	306173
1773	4-androsten-3beta,17beta-diol monosulfate (1)	Lipid	Steroid	37211	LC/MS Neg	100002028	4547	369.174	521-17-5			HMDB03818	115839	224193		392767	233748	903662	412518	96211		130727		329605	405462	99547	858141	897447	1.24428e+06	354500	164213		205615		280858	132079	1009168	183686			101351		129013	183462		853805	598931	676202	126656
2715	4-ethylphenylsulfate	Xenobiotics	Benzoate Metabolism	36099	LC/MS Neg	100001756	3580	201.023	123-07-9		C13637		202750	489389	306230	530737		177527	267022		240122	100271	316757	229824		96451.9	73637.2	150275	206766		119540	169645	67123.5		199160		114426	43623			69583.6	47973.7						54797.5
375	4-guanidinobutanoate	Amino Acid	Guanidino and Acetamido Metabolism	15681	LC/MS Pos	100000096	1150	146.092	463-003;463-00-3	500	C01035	HMDB03464	1.86088e+06	3.55024e+06	2.24842e+06	3.6919e+06	947183	1.15409e+06	742359	559170	3.15819e+06	921504	1.03212e+06	1.32789e+06	1.66248e+06	1284784	1.15154e+06	3544208	1.80421e+06	2.2653e+06	855599	2.41888e+06	955895	993856	1095407	1.50262e+06	1.07985e+06	1.01334e+06	909370	1.17512e+06	998634	760262	1.88769e+06	1.52396e+06	3.09392e+06	890483	1.27407e+06	2.03258e+06	3.05138e+06
2692	4-hydroxybenzoate	Xenobiotics	Benzoate Metabolism	21133	LC/MS Neg	100000862	820	137.024	99-96-7	135	C00156	HMDB00500		739497	676988	476747	124155		402489	266345	440770	528055	308651	204029	244584		100301	2.8825e+06	354323	655921		696747	281008			210577	153546	697112	426682	282884	219208	361576							48787
1255	4-hydroxybutyrate (GHB)	Lipid	Fatty Acid, Monohydroxy	34585	LC/MS Pos	100001507	1480	87.0441	502-85-2	10413	C00989	HMDB00710	1.72361e+06	1.54301e+06	5304963	2.21985e+06	7621241	17299454	2.59825e+06	802728	4224173	7.1109e+06	2.26031e+06	469005	6.65182e+06	1.0364e+06	1.749e+06	4.36708e+06	2.2145e+06	6.51723e+06	2.73842e+06	3.50553e+06	4.94616e+06	9538150	2.29953e+06	9910698	10328641	4166360	2.7983e+06	1719330	2.10626e+06	6218360	1.16569e+06	11047299	6.64375e+06	4294093	7514367	7144885	7960658
240	4-methyl-2-oxopentanoate	Amino Acid	Leucine, Isoleucine and Valine Metabolism	22116	LC/MS Neg	100000551	2170	129.056	816-66-0	70	C00233	HMDB00695	25124180	6.20858e+06	8835544	34694468	75944976	5251843	47191188	2.66914e+06	4.10999e+06	1.93795e+06	4938283	50076812	88463568	39146440	16083565	10171252	12874991	24333604	6305643	6.98338e+06	4052759	3.99553e+06	2.47018e+06	2.16248e+06	2.79246e+06	3.5953e+06	2752057	3.37399e+06	1.8116e+06	3159890	4.39197e+06	3.20243e+06	3.33645e+06	3.15874e+06	3.91259e+06	2.57788e+06	3584880
2705	4-methylcatechol sulfate	Xenobiotics	Benzoate Metabolism	46146	LC/MS Neg	100004111	2665	203.002					742593	3.34057e+06	903784	9950593	954114	293216	1.80835e+06	1.17466e+06	155403	317380	160156		855493		371176	42022.5	24863	123544		598140	982550	359155	7.09332e+06	453669	170684	719407	383080		461968			415343		172471
2716	4-vinylphenol sulfate	Xenobiotics	Benzoate Metabolism	36098	LC/MS Neg	100001755	3320	199.007	2628-17-3	6426766	C05627	HMDB04072	687783	1.37581e+06	1.25477e+06	2.72251e+06	341147	878229	163891		259653	269911	3.50097e+06	1.82738e+06	592337	1.0146e+06	1.41718e+06	1.04681e+06	2.71933e+06	533507	1.20287e+06	744018	343831	364941	804332	30844.6	791822	70963.6				475813	472373		448475		59743.5	1.12903e+06
2561	5,6-dihydrothymine	Nucleotide	Pyrimidine Metabolism, Thymine containing	1418	LC/MS Pos	158	1654.2	129.066	696-04-8	93556	C00906	HMDB00079	519184	2.73656e+06	1.93882e+06	2.32836e+06	9421839	2.70304e+06	2251994	2.12203e+06	2871085	2121533	1875290	1852558	3.54806e+06	2.30142e+06	1.10982e+06	1.3835e+06	1.06601e+06	2.79321e+06	4927426	8417528	12668282	6.43707e+06	8705039	3.90839e+06	16072558	7.19982e+06	5.54969e+06	16093002	3.68517e+06	3.67597e+06	6376490	3.31629e+06	17040400	8501031	16594448	5.90091e+06	10323194
2527	5,6-dihydrouracil	Nucleotide	Pyrimidine Metabolism, Uracil containing	1559	LC/MS Pos	1125	1148	115.05	504-07-4	649	C00429	HMDB00076	2810864	11651617	27976694	6837821	74830888	20937296	23008642	13687056	30359164	41887836	12594057	5.35587e+06	40297528	13221765	12222596	9465241	13307589	25213270	39315336	29510272	57903820	52996712	24425060	73088720	80582064	74093080	53541700	32070986	57803348	42000960	9387985	59284876	88813992	39883500	86829400	59529712	58900940
93	5-aminovalerate	Amino Acid	Lysine Metabolism	18319	LC/MS Pos	100000454	835	118.086	660-88-8	138	C00431	HMDB03355	29618854	15526657	36202756	29598688	74726016		49581972	22614908	55499800	9956757	30304868		106063936		29947910	119311304	41267092	33596564		90324712	54430256	47568100		40649952	124743824	19126830	103116936	88377584	16017398	8899781	319392544	32296290		35530028	25521544	58037640	30703736
1012	5-dodecenoate (12:1n7)	Lipid	Medium Chain Fatty Acid	33968	LC/MS Neg	100001232	5224	197.155	2430-94-6	5312378		HMDB00529	15033071	12471823	15932592	15609034	10104511	13336552	19812206	10476553	11563660	13430227	15450933	17113652	9711424	9331197	10524657	9768562	7.89351e+06	12969389	21467650	47539456	38950956	17680700	26876254	18106778	20209428	20800994	25331660	63985760	28508340	24848922	45892448	12232368	22397946	18578572	12569426	10240922	19027150
1272	5-hydroxyhexanoate	Lipid	Fatty Acid, Monohydroxy	31938	LC/MS Neg	100001148	1267	131.071	44843-89-2	170748		HMDB00525	527209	803320	711040	361298	925482	638677	633491	732299	840602		1128101	529727	727114	2.29774e+06	637246	726086	786312	612949	1.88753e+06	757461			415605	565424	1.02269e+06	710675	1.01452e+06	416300	573101	506493	420387	705854	1.60984e+06	487775	950970	568379
2554	5-methyl-2'-deoxycytidine	Nucleotide	Pyrimidine Metabolism, Cytidine containing	38159	LC/MS Pos	100002300	1481	242.114	838-07-3	440055	C03592	HMDB02224	1.5827e+06	2125891	2.43742e+06	1.63955e+06	2.32777e+06	1175588	1.95702e+06	2837840	2.70188e+06	5972796	3.28272e+06	1302778	1.23258e+06	561126	1.55673e+06	1.06775e+06	561819	1.97249e+06	1566529	3.38827e+06	3104300	3.37166e+06	2.527e+06	2455379	2.75839e+06	2.91239e+06	3.52684e+06	3.71984e+06	3.87895e+06	4154859	1.75319e+06	2.53199e+06	2537406	2.45861e+06	2.90167e+06	1.98692e+06	2.27708e+06
366	5-methylthioadenosine (MTA)	Amino Acid	Polyamine Metabolism	1419	LC/MS Pos	212	2444.9	298.097	2457-80-9	439176	C00170	HMDB01173				3.31545e+06	3236144	3611765	1.07043e+06	345227	232362	2631245		3.85169e+06	4.38009e+06	994523	2.07897e+06	9843262	3063129	5.36859e+06	273844	11160608	29081826	13667064	24645068	21805514	3.84236e+06	3660503	2613641	2.80448e+06	630232		16404623	16028439	72899808	11908457	28715190	18595524	46696096
2520	5-methyluridine (ribothymidine)	Nucleotide	Pyrimidine Metabolism, Uracil containing	35136	LC/MS Neg	100001446	1778.1	257.078	1463-10-1	445408		HMDB00884	394585	659884	428855	374411	682568	316488	256781	702303	1.42007e+06	249552	940032	420111	129782	394491	178476	270030	319835	515859	610161	2.70218e+06	1.06803e+06	235074	1.04511e+06	139133	475602	665198	272586	4248755	324733	336366	941676	105697	389731	842110	306697	621484	222410
385	5-oxoproline	Amino Acid	Glutathione Metabolism	1494	LC/MS Neg	1021	738.5	128.035	98-79-3	7405	C01879	HMDB00267	460730496	520070912	475659424	215809392	247804128	161784000	180117968	694766720	494421856	576776128	578762496	161781296	169277536	92481360	178486000	192582864	132177720	206554720	137878016	417597696	508131008	429003808	329868704	186364608	414405568	328926400	631884608	913004224	835140928	739342656	202721744	187513920	321164832	300363488	259715376	150098960	180817872
1328	6-keto prostaglandin F1alpha	Lipid	Eicosanoid	20476	LC/MS Neg	100000571	4190	369.228	58961-34-8;58962-34-8	5280888	C05961	HMDB02886	1.57264e+06			407637				2.79919e+06	3.90905e+06	2.89784e+06	3.16382e+06							4688899		1.76353e+06			351807			14853766	12185323	5.5509e+06	7.36591e+06	45333524
3187	6-oxopiperidine-2-carboxylic acid	Xenobiotics	Drug	43231	LC/MS Pos	100004499	1826.6	144.066	34622-39-4	3014237			215641	672941	696888	684977	1.49722e+06		814759	739381	1.31454e+06	1.00627e+06	1.14706e+06	483397	865654	1.54905e+06	991200	1.94619e+06		802515	1508749	522984	523070	489966	554380	584324	608271	778080	704731	531059		867194	143754	555458	2.24983e+06	556629	581962	351103	713648
819	6-phosphogluconate	Carbohydrate	Pentose Phosphate Pathway	15442	LC/MS Neg	100000341	583.9	275.017	921-62-0;53411-70-4	91493	C00345	HMDB01316	2500287	4581967	2.48068e+06	4066440	1.52944e+06	3211899	2.40516e+06	5.53654e+06	3.71397e+06	12088164	4.68687e+06	2.91265e+06	4728549	618536	820004	7515504	4.02829e+06	3.51807e+06	689878	8195476	7.51988e+06	24804324	2.2264e+06	4.10459e+06	3174776	5267812	8657462	5517695	11643562	4804271	3160203	2.60539e+06	4.75941e+06	2.97919e+06	2661823	2.70888e+06	1.04014e+06
1685	7-alpha-hydroxy-3-oxo-4-cholestenoate (7-Hoca)	Lipid	Sterol	36776	LC/MS Neg	100001609	5288.1	429.301	115538-85-7	3081085	C17337	HMDB12458	3.02338e+06	6538222	6318319	3549095	5.61889e+06	4257434	11656158	5084572	4.34326e+06	1589969	10787604	6341660	5017200	2899943	3.00221e+06	2446977	2.17483e+06	6583528	1.7725e+06	2.40893e+06	5564334	2.307e+06	3014931	2.85605e+06	5936841	4.07508e+06	4874641	9395586	5836786	3.43327e+06	4336490	12920686	2726341	2905685	1437673	1.87562e+06	706744
2487	7-methylguanine	Nucleotide	Purine Metabolism, Guanine containing	35114	LC/MS Pos	100001456	1395.6	166.072	578-76-7	11361	C02242	HMDB00897	2.07375e+06	3.32923e+06	3325081	1.75571e+06	6370868	1.79805e+06	2.82722e+06	2.8237e+06	3851225	4271140	2.33388e+06	2.06336e+06	3.34014e+06	2.46307e+06	3.0536e+06	3.40349e+06	2.44251e+06	2.83271e+06	3.74989e+06	4.85709e+06	4.3935e+06	5608473	4.06287e+06	5.95606e+06	9732856	5.50507e+06	3.34453e+06	13138736	5984825	3425152	4415774	5.28603e+06	3524134	4916952	6579912	4.03961e+06	4318607
765	Ac-Ser-Asp-Lys-Pro-OH	Peptide	Polypeptide	40707	LC/MS Pos	100003761	1760	488.235	127103-11-1	4409396				793112	626467	325017	441657	87817.1		879533	873880	1.18255e+06	840774									5404261	8.14679e+06	5.31802e+06	979412	1.35043e+06	2.40991e+06	789160	9779010	5.4119e+06	4.51572e+06	4.31504e+06	733974	1.46126e+06	4.56651e+06	645915	2.58901e+06	412135	343579
1229	acetylcarnitine	Lipid	Fatty Acid Metabolism(Acyl Carnitine)	32198	LC/MS Pos	100000802	1166.9	204.123	5080-50-2	1	C02571	HMDB00201	776777792	1406398976	1098294912	3560675328	1278634880	6159945216	1609797376	1442430592	1831403520	657707008	1225020672	1069090496	2983300096	598099072	883404032	4693343232	3085501952	2655903744	845582464	589511488	696309504	531219392	1133394560	1514661504	2380171008	1706028544	1560083584	572763648	1470280960	1192532352	1504783744	1248468608	1411168896	1528258176	1957120384	1550985472	1185098112
1000	acetylphosphate	Energy	Oxidative Phosphorylation	15488	LC/MS Polar	1211	4013.9	138.98	94249-01-1	186	C00227	HMDB01494	6.27649e+06	18530148	8332584	12571234	2959063	7347915	3.91728e+06	11490210	9162416	5.22143e+06	8996074	6981204	6525283	2.84444e+06	3.69984e+06	9807056	8.17143e+06	6.632e+06	3.35177e+06	5766580	4589275	3.76367e+06	1.64322e+06	3.38793e+06	3731754	1.65606e+06	5.75124e+06	4995854	10034656	4775187	1.45123e+06	2.53954e+06	2.48045e+06	1.68438e+06	1707599		1.22907e+06
362	acisoga	Amino Acid	Polyamine Metabolism	43258	LC/MS Pos	100004541	2290	185.128	106692-36-8	129397			3.24871e+06	5.36802e+06	7.25596e+06	7.03779e+06	13308579	8.21974e+06	9297607	5641135	7.57243e+06	6956896	7.90771e+06	7.91812e+06	12773608	8342058	7594204	8396274	6.73336e+06	6.91383e+06	7.35386e+06	3.42932e+06	4692250	6139551	6983197	12867992	8358982	9415632	4.29448e+06	6379919	7735674	6708788	7808178	11811129	8.13538e+06	7857519	6.88585e+06	6.5307e+06	7684281
2452	adenine	Nucleotide	Purine Metabolism, Adenine containing	554	LC/MS Pos	880	1002	136.062	73-24-5	190	C00147	HMDB00034	2.66026e+06	1079472	2.03241e+06	1293921	654931	1304441	467696	389836	162947	2953995	403137	1.75657e+06	954710	1468849	6.8404e+06	18818004	4009160	2751655	894477	4.4882e+06	8556769	3650479	2885185	9243496	1878699	1.59887e+06	2320813	707277	720437	769637	36151120	3606677	26690754	3.2303e+06	2280660	4.01804e+06	5263263
2451	adenosine	Nucleotide	Purine Metabolism, Adenine containing	555	LC/MS Pos	798	1625.3	268.104	58-61-7	60961	C00212	HMDB00050	11361593	8657630	12902887	8508257	18392284	3.96985e+06	10357535	6877965	10737327	9879412	8302375	19147044	10129953	36734820	34441932	64446004	38137400	20635214	19201810	15110476	8495101	13430347	16378780	19717422	7112917	18786638	7.98736e+06	12920373	7.26538e+06	11590065	38462784	15411665	56523524	26953038	26815456	45568604	26643088
2446	adenosine 2'-monophosphate (2'-AMP)	Nucleotide	Purine Metabolism, Adenine containing	36815	LC/MS Pos	100001694	1658	348.07	130-49-4	94136	C00946	HMDB11617	8.35492e+06	53905488	15843415	9730495	7923350	1.81667e+06	10978889	41203956	40885260	8267358	31695256	19085904	2290344	581886	2.82038e+06	7016432	2.91108e+06	18644862	762379	14945279	16707992	3.91905e+06	3.42871e+06	1.75932e+06	4252503	3.92246e+06	8546443	3.17128e+06	1.83353e+06	6.69561e+06	310795	1801460	5.05173e+06	1.32677e+06	1.07401e+06	1.60891e+06	3.73837e+06
2447	adenosine 3',5'-cyclic monophosphate (cAMP)	Nucleotide	Purine Metabolism, Adenine containing	2831	LC/MS Neg	207	1952.2	328.045	60-92-4	6076	C00575	HMDB00058		153735	235995	268517	391896	186175	166988	144095	212301	342978		268922	424159	159232	222929	345358	311200	327219	163591	326824	339048	138465	331078	175428	194884	388061	321701	154039	132373	210134	206856	191207	397152	147908	266117	229297	206832
2449	adenosine 3',5'-diphosphate	Nucleotide	Purine Metabolism, Adenine containing	15691	LC/MS Neg	1214	575	426.022	75431-54-8	159296	C00054	HMDB00061		160297		957137	228116		362074		269816	182936		597677	204736	96180.2	579317	166056					589735	66028	683087		370471	243389	85262.6				236392			1460475	85564.4	105233	71784.6
2445	adenosine 3'-monophosphate (3'-AMP)	Nucleotide	Purine Metabolism, Adenine containing	35142	LC/MS Pos	100001449	1470	348.07	84-21-9	41211	C01367	HMDB03540	732802	3.74041e+06	3.8183e+06	1.70024e+06	1.35551e+06	1.66443e+06	1.28306e+06	4.32754e+06	3284470	1696573	2601703	530328	317129	371550	659248			3.69656e+06	1.58059e+06	23383154	22169016	7.00105e+06	4291353	2.00401e+06	19604722	21081824	26241354	4390358	10940498	16211329	992173	2.06169e+06	2.477e+06	1.08854e+06	3.91777e+06	1.63193e+06	521995
2443	adenosine 5'-diphosphate (ADP)	Nucleotide	Purine Metabolism, Adenine containing	3108	LC/MS Neg	208	680	426.022	20398-34-9	6022	C00008	HMDB01341				5.78628e+06	1345372	457831						3.33199e+06	4598325		283795	16128772	11762808	4.43386e+06			1.72617e+06		2.1872e+06			2.99129e+06	1.76845e+06				2.51499e+06	1609792	6.61287e+06	2855698	7012483	8031607	15600516
2589	adenosine 5'-diphosphoribose (ADP-ribose)	Cofactors and Vitamins	Nicotinate and Nicotinamide Metabolism	558	LC/MS Neg	215	920	558.064	68414-18-6	192	C00301	HMDB01178				1452604	3.2734e+06	12988418						2.76909e+06	16750974	4.04421e+06	858257	6096680	3.8201e+06	9566526	848653		151812			10065074							6319635	12472589	7.46115e+06		4.25547e+06	4542163	772665
2444	adenosine 5'-monophosphate (AMP)	Nucleotide	Purine Metabolism, Adenine containing	32342	LC/MS Pos	209	1208	348.07	149022-20-8	6083	C00020	HMDB00045	876471	537792	1.26873e+06	3.5121e+06	9602780	3794007	431152	157497	1108952	1447316	282986	4890663	12751046	3.20928e+06	4.03014e+06	61568624	37151360	16163613	2.59943e+06	3.53594e+06	4842324	4.45886e+06	9808898	22900528	2412531	9867257	2.48221e+06	4.16511e+06	829260	1.2716e+06	24883598	25672360	59312512	13270363	11604625	45006816	69959288
2450	adenylosuccinate	Nucleotide	Purine Metabolism, Adenine containing	18360	LC/MS Neg	1303	560	230.53	19046-78-7	195	C03794	HMDB00536													1.18849e+06			1.73262e+06	1.8007e+06	252304			1.06439e+06		564196	597483							630770	439663	497229		290906	1.26517e+06	11332944
1062	adrenate (22:4n6)	Lipid	Polyunsaturated Fatty Acid (n3 and n6)	32980	LC/MS Neg	100001193	5678	331.264	2091-25-0	5497181	C16527	HMDB02226	324157376	277255584	474031936	222560512	371709632	332369632	307969024	836602880	281035904	583578624	330085696	143175136	111055752	115263072	113985520	84894600	39905928	300626240	467379712	1829054336	4471971840	2356323584	762101056	1345498496	1906589568	1358672128	1977967360	1962627456	3034935296	1719287424	921692096	1101878784	1018974464	926959040	956628928	292490208	166093024
25	alanine	Amino Acid	Alanine and Aspartate Metabolism	1126	LC/MS Pos	811	696	90.055	56-41-7	5950	C00041	HMDB00161	216568176	223145888	327908928	195712288	254075200	345574560	202625136	256237136	395029472	391868128	290985440	97683752	293190016	97456400	190365344	305695168	154281072	238887392	147493008	425223424	429970688	445797024	311637184	189708224	257545248	303030304	542861056	675259904	377929856	457140864	164446592	200760608	209365728	274587712	353924736	212765424	338786016
423	alanylleucine	Peptide	Dipeptide	37093	LC/MS Pos	100001890	2165	203.139	1638-60-4	259583		HMDB28691	206182	736798	1364445	2.08341e+06	9366128	6.69467e+06	2.28107e+06	357213	3335980	1.24722e+06	697800	724590	7089311	414462	3.26102e+06	1.93804e+06	2281466	11748920	2600574	7.61943e+06	46164820	10953805	7531600	29244410	11962694	12627744	8730395	9087751	3.18341e+06	3.436e+06	10068991	32876190	54115000	23340960	6.98146e+06	6.43163e+06	6760472
2439	allantoin	Nucleotide	Purine Metabolism, (Hypo)Xanthine/Inosine containing	1107	LC/MS Polar	1002	1672	157.037	97-59-6	204	C02350	HMDB00462	815486	469023	805686	1.06611e+06	675414	862806	615702	1044763	1067694	1.19537e+06	717485	760134	886152	1.5165e+06	610156	249712	445635	461370	940110	271849	242181	207618	266180	263091	475357	264355	520875	682924	1.06082e+06	528047	200310	904768	146375	364784	193801	234074	453755
285	alpha-hydroxyisocaproate	Amino Acid	Leucine, Isoleucine and Valine Metabolism	22132	LC/MS Neg	100000706	1840	131.071	10303-64-7	83697	C03264	HMDB00746	837941	1.76863e+06	2409488	2.36742e+06	9117229	5.8842e+06	2192591	1.63094e+06	3.83227e+06	2.02017e+06	3.38695e+06	1.28273e+06	11610631	2234925	3.19955e+06	4729655	2.03312e+06	4866187	1.03895e+06	1.71398e+06	18346064	2987246	1.89386e+06	12170354	4307350	2510117	1.7691e+06	4.77862e+06	1.2207e+06	1.38451e+06	14134155	2.27726e+06	1.18237e+06	18977272	3.11024e+06	12620829	31428286
256	alpha-hydroxyisovalerate	Amino Acid	Leucine, Isoleucine and Valine Metabolism	33937	LC/MS Neg	100001300	1126	117.056	600-37-3	99823		HMDB00407	6285865	12514197	11001080	9948100	17078504	15355427	8.04994e+06	10323156	28965150	8592224	12883355	7.77708e+06	16536384	40158892	13880019	25853140	7.74009e+06	11723727	38248172	9292853	14828662	9575674	10850694	18356374	17263672	9279804	9385814	26151376	8.01583e+06	11138410	20652052	13053371	41632908	16839168	24332208	13976975	32546768
250	alpha-hydroxyisovaleroyl carnitine*	Amino Acid	Leucine, Isoleucine and Valine Metabolism	46263	LC/MS Pos	100005836	1863	262.165						512908	668953	571832	396024	2.95118e+06	512908		788811	805324			1.37746e+06		392209	2.43634e+06	1.06367e+06	844180			382179	362613	387674	533599	679318	649478				397918		320733	443063		416883
984	alpha-ketoglutarate	Energy	TCA Cycle	528	LC/MS Polar	93	2700	145.014	305-72-6;328-50-7;22202-68-2	51	C00026	HMDB00208	9249491	4.18343e+06	7.49307e+06	8166698	6450344	7345282	3944832	4.95539e+06	8833201	7.85824e+06	4517443	5830393	6910325	6208567	4.55916e+06	11331616	11848498	8753545	4407151	6764629	5780719	9205655	6275517	6300221	5.97967e+06	8727490	6.53439e+06	7.39581e+06	7639820	8759341	5.78307e+06	6960659	5792565	7.76676e+06	13890070	10986546	11408109
2608	alpha-tocopherol	Cofactors and Vitamins	Tocopherol Metabolism	1561	GC/MS	1105	2305.4	502.5	59-02-9;10191-41-0	14985	C02477	HMDB01893	90224.4	287632	152010	138071	128283	158907	223566	230651	83865.1	105664	130549	189985	182236	135522	108698	128024	102264	129760	139607	258970	171185	149395	118650	270174	149895	116957	136350	253540	163201	456343	74551.5	302600	272096	145786	237308	153221	225450
1772	androsterone sulfate	Lipid	Steroid	31591	LC/MS Neg	100001073	5022	369.174	2479-86-9	159663		HMDB02759	1265428	1.78543e+06	1.53391e+06	3.308e+06	1160021	2.17182e+06	10587024	1.00506e+06	609890	967480	3527077	2.89657e+06	1.0853e+06	811618	3.652e+06	3.92486e+06	1.64924e+06	1.72505e+06	1.91526e+06	1.31956e+06	513491	431130	1.66607e+06	388336	2.03603e+06	4.11205e+06	312830		976878	1159011	1.36472e+06		310097	2502283	1.9042e+06	753939	556612
412	anserine	Peptide	Dipeptide Derivative	15747	LC/MS Neg	100000044	1124.8	239.115	10030-52-1	112072	C01262	HMDB00194	119156	208598	312740	1522191	670382	4.12802e+06	1092612	41018.3	2133720		1318997	172320	9340981			4.17322e+06	4597139	1.98933e+06				316355			1.23353e+06	2368507		620663		294991			53327.5		1.18525e+06	723471
839	arabinose	Carbohydrate	Pentose Metabolism	575	GC/MS	828	1631.6	217	28697-53-2	66308	C00216	HMDB00646	55716.1	53465.1	68101.6	30754.9	108983	69366.7	17580.6	26943.4	77207	98011	43516.1	31773.5	72379.9	67202.3	17118.1	94932.1	51972.2	56422.4	20990.4	14340.4	77727.1	74257.9	31093.3	139125	94971.1	112141	136154	41451.8	65003.3	55746.1	22075.8	111278	176365	49448.1	117983	166194	70240.8
844	arabitol	Carbohydrate	Pentose Metabolism	38075	GC/MS	100000012	1687.5	307.1	7643-75-6	94154	C01904	HMDB00568	28411	43852.5	31194.9	47096.8	92548.6	63225.3	34899.8	31293.2	60398.5	93334	45010.7		98339.2		39814.5	40268.9	27082.5	39894.1	45947.9	65200.6	85900.7	57671.5	48475.2	111449	79319.5	97628	30257.9	59923.4	48971.8	80000.1	77621	114594	45666	102736	62799.6	53903.2	31794.4
1033	arachidate (20:0)	Lipid	Long Chain Fatty Acid	1118	LC/MS Neg	893	6295	311.296	506-30-9	10467	C06425	HMDB02212	54404204	41891256	78257592	58919792	54500488	35296064	46329728	82080552	68095552	65018500	59757592	46841260	34216016	36438856	61888964	57016768	74743624	54399056	74194768	191230112	173649760	87462576	80161672	73509568	66366268	90058456	91177968	123320336	115538904	82065752	143040016	57952804	77551000	132353376	74173536	61648636	62415816
1061	arachidonate (20:4n6)	Lipid	Polyunsaturated Fatty Acid (n3 and n6)	1110	LC/MS Neg	229	5535	303.233	506-32-1	444899	C00219	HMDB01043	2868968448	2373667584	4615069696	2773674752	3079685120	2914800896	2769438208	3390905344	2642192128	4575968768	2729053184	1351294720	1970958208	1168329984	1772619904	1128022912	1172344576	3720345600	1703576576	6172922880	10199950336	4871289856	3964645632	5560132608	6683162112	3863232256	6729612288	6880605184	7760495104	5139782656	2684277760	5474864128	3745918208	3416627456	1951933952	2231777536	1111996800
325	arginine	Amino Acid	Urea cycle; Arginine and Proline Metabolism	1638	LC/MS Pos	231	700	175.119	1119-34-2	232	C00062	HMDB00517	194317216	375415040	320824800	206950736	240999040	120558072	212131408	359662656	402224736	436895936	380373824	179573024	108777184	65988948	147325728	65259984	54702748	178337104	110480608	482898336	603271104	451024320	258358128	265283968	294731328	282171456	689137664	653140992	531875040	533822336	108146616	245930688	272439232	249580352	156202496	104699800	151476432
330	argininosuccinate	Amino Acid	Urea cycle; Arginine and Proline Metabolism	15497	LC/MS Neg	232	638.1	289.115	156637-58-0	16950;828	C03406	HMDB00052	3.8419e+06	3.21414e+06	6383909	1.4774e+06	1.37131e+06	289057	1609595	5.06768e+06	4.37407e+06	11986612	3.35135e+06	553045	481709	407250	1.85974e+06	365274		1.37289e+06	600930	2.2885e+06	467445	1066265	1.26681e+06	561618	2634249	2.44259e+06	5722070	5.09211e+06	4974940	5.60747e+06	271049	335686		711463	735783		2.78801e+06
2602	ascorbate (Vitamin C)	Cofactors and Vitamins	Ascorbate and Aldarate Metabolism	32354	LC/MS Neg	233	645.3	175.025	134-03-2		C00072	HMDB00044	6.57426e+06	8378352	26194384		67245576		4752038	442472	2.71994e+06			1.02018e+06	15641957	6312275	46332776	10908493	4802851	25357850	3.46161e+06	81520168	208516592	84641424	153685312	129551440	85837680	140120256	203750640	209846224	14324418	22079634	148646160	200734752	485785504	140611840	105303496	40712408	29894798
30	asparagine	Amino Acid	Alanine and Aspartate Metabolism	512	LC/MS Polar	917	2951.1	131.046	70-47-3	6267	C00152	HMDB00168	29476110	50135560	57144288	41202800	81104368	44333176	42490804	77942880	81817816	85866072	74603112	24504624	68875232	11751843	25361952	24791900	14147126	54365984	44794356	144827600	159305536	147387392	91696512	83950488	87952848	108108440	146193792	159740640	138446240	157458912	39320732	68318112	79907616	74230416	92225040	45029124	55763716
28	aspartate	Amino Acid	Alanine and Aspartate Metabolism	443	LC/MS Neg	234	640	132.03	56-84-8	5960	C00049	HMDB00191	113078592	113075184	165464496	58344572	126518008	42976384	65399472	200176752	169950016	172403328	197587984	46562324	57254020	19517726	56201332	53405064	22760336	69632512	70205760	258070448	214189824	224300272	183844672	214439280	169532400	144945360	374769312	420101216	298320672	376614368	58759000	213882512	206706992	126944368	186453376	161343648	245285072
1144	azelate (nonanedioate)	Lipid	Fatty Acid, Dicarboxylate	18362	LC/MS Neg	2029	1276	187.098	123-99-9	2266	C08261	HMDB00784	12079977	106386584	83889304	77048696	4.95624e+06	6120717	3993428	4901893	6.2796e+06	7.31151e+06	8112418	14590795	3.45803e+06	3.2609e+06	2.04726e+06	2.09879e+06	2.69978e+06	3.59989e+06	3.72164e+06	26631794	9771490	3831533	15206986	2585282	15263607	7.03938e+06	3.15106e+06	5.23224e+06	2.67831e+06	5284185	3.85291e+06	2745117	5.75509e+06	2274156	4.31688e+06	3.00847e+06	2534208
2683	benzoate	Xenobiotics	Benzoate Metabolism	15778	LC/MS Neg	100000008	1750	121.029	65-85-0	243	C00180	HMDB01870	29786034	46117272	27734082	18785876	25667844	16852402	49753476	33847524	30911402	18116530	25018636	52491096	15048209	29528402	38986116	18864002	17158134	29148600	37681520	27123944	21174102	21876534	37896324	19168062	54175972	24614460	23464410	39603132	26717192	20767744	28201574	17816036	21908604	23728480	22217376	20833630	23546682
2534	beta-alanine	Nucleotide	Pyrimidine Metabolism, Uracil containing	55	GC/MS	244	1451.8	174	56-41-7;107-95-9	239	C00099	HMDB00056	221055	467536	261635	1.05031e+06	317632	1.93123e+06	970309	188138	922097	280322	537610	285275	1.09375e+06	106675	475349	1.25016e+06	448388	980320	329110	928963	616756	448245	624347	888387	797132	1.45896e+06	838515	845408	710327	819258	611143	612342	1.13285e+06	1.64428e+06	1590912	848096	1.20631e+06
248	beta-hydroxyisovalerate	Amino Acid	Leucine, Isoleucine and Valine Metabolism	12129	LC/MS Neg	1442	1027	117.056	625-08-1	69362		HMDB00754	2.029e+06	4.07153e+06	2.08742e+06	3796337	6.7726e+06	2635965	3417448	2441178	4.47339e+06	5887401	3998087	5.13417e+06	4722391	7188859	5.12786e+06	4.67823e+06	5374426	6155379	7730142	2.8274e+06	2.92223e+06	1.51367e+06	2728122	2440892	4336618	3.26226e+06	2.03962e+06	4.76212e+06	6.3654e+06	3.87446e+06	2.57918e+06	2.16043e+06	2.62186e+06	4.05208e+06	5705529	3391195	3807011
249	beta-hydroxyisovaleroylcarnitine	Amino Acid	Leucine, Isoleucine and Valine Metabolism	35433	LC/MS Pos	100001594	1701	262.165	99159-87-2				5146552	9382414	11248815	15369291	9026944	54806296	11047879	4254523	17013718	8455303	8617326	3.94536e+06	39924688	5055950	5.46332e+06	22723036	49191828	10549938	6.44671e+06	7004937	15769627	9458497	8.1159e+06	13478129	19466618	18785822	7251349	6.71044e+06	21148402	15408787	6.64689e+06	10171253	10977823	14329094	16813924	10882755	5.94377e+06
6	betaine	Amino Acid	Glycine, Serine and Threonine Metabolism	3141	LC/MS Pos	799	734	118.086	107-43-7	247	C00719	HMDB00043	308272064	360885760	356305504	219039504	392617024	267160656	362641728	211392144	250708576	392383328	311068032	336590464	235667264	554892160	367379392	309279744	308019552	318029824	1197629440	411285504	674437632	489537792	415051232	537286848	546035648	482967008	507894560	354149120	381210368	461681152	517594240	486930176	801780800	451644032	600558016	532925184	422086432
7	betaine aldehyde	Amino Acid	Glycine, Serine and Threonine Metabolism	15499	LC/MS Pos	1219	646.2	120.102	7758-31-8	249	C00576	HMDB01252	41074036	3.33986e+06	10159726	1.07667e+06	1.95211e+06	445180	1.53793e+06	4.50265e+06	605927	39563120	2.59639e+06	1.8042e+06	1.49695e+06	7.13031e+06	13761404	158050	321817	342916	6.46877e+06	1.19722e+06	363330	341109	691623		2.99666e+06	3.53434e+06	1.64611e+06	13488585	1.58684e+06	4736134	194984	219386		1.45031e+06		340949
2643	bilirubin (Z,Z)	Cofactors and Vitamins	Hemoglobin and Porphyrin Metabolism	43807	LC/MS Neg	1090	4796.2	583.256	635-65-4	5280352	C00486	HMDB00054	261237	1.57017e+06	870167		2.0342e+06		1.7569e+06	263437	97885.7		312931	201317	1.56777e+06	208044	650900	1.07855e+06	630533	675270	647172	968737	734048	464983	1.15183e+06	743277	558679	1.60349e+06	680289	95658.5	179295	367461	930401	719694	187670	1.04325e+06	1140955	568174	287300
2646	biliverdin	Cofactors and Vitamins	Hemoglobin and Porphyrin Metabolism	2137	LC/MS Neg	250	4695.6	581.241	55482-27-4;55482-27-4	5353439	C00500	HMDB01008		720972		87628.6	238710		672117	380626	192029		213555	442186	312206	59433.4	128772	441482	251317	133812	363432	448283	202792	97934	144966		72461.1	146872	194797		172408	114484	64335.2			149804	283243
2628	biopterin	Cofactors and Vitamins	Tetrahydrobiopterin Metabolism	12358	LC/MS Pos	1548	1562.7	238.093	22150-76-1	445040	C06313	HMDB00468																				204496	209857	518201					233559		1838792	544437			401337		339468
1212	butyrylcarnitine	Lipid	Fatty Acid Metabolism (also BCAA Metabolism)	32412	LC/MS Pos	100001054	1977	232.154	25576-40-3	439829	C02862	HMDB02013	100503472	120940032	249413040	133945192	114140864	1766289664	141121104	99977240	206072944	78515648	94596640	69502584	524891424	32536276	52774972	901014144	740711744	257271280	50615188	184554800	117849728	71154192	84554200	1216087296	408864928	159292704	481364512	137033984	170233168	214469424	272586496	722118144	697925952	158546960	182905808	509982336	243685376
234	C-glycosyltryptophan	Amino Acid	Tryptophan Metabolism	48782	LC/MS Pos	100006379	1907	367.15	180509-18-6	10981970			1.06978e+06	1.99781e+06	2.55586e+06	1.3564e+06	6846872	2.50315e+06	2.16997e+06	3.58144e+06	3.02096e+06	2.47673e+06	2836180	1.93819e+06	2767565	1.34012e+06	1.56738e+06	2687202	1.65066e+06	4.14243e+06	4048902	5.42168e+06	5.53665e+06	7.31771e+06	5136123	9943344	7.03327e+06	7757642	6075461	6.00194e+06	12889877	6.75957e+06	4805310	7.09737e+06	5360685	8901112	8903937	4.18689e+06	6253394
91	cadaverine	Amino Acid	Lysine Metabolism	15308	LC/MS Pos	100000110	593.9	103.123	462-94-2;1476-39-7	273	C01672	HMDB02322			1.98362e+06	280701	1.53781e+06	1.25748e+06		381638	895964		1122761	304672	2.38029e+06			2.54155e+06	208946	805836		285770	785513	434482		527275	642245		941318				3342093		436069		946868		593835
2734	caffeine	Xenobiotics	Xanthine Metabolism	569	LC/MS Pos	849	2819	195.088	58-08-2	2519	C07481	HMDB01847
1008	caprate (10:0)	Lipid	Medium Chain Fatty Acid	1642	LC/MS Neg	888	5090.7	171.139	112-37-8	2969	C01571	HMDB00511	21500152	18330856	23162462	25540636	26570868	20349596	96004736	26578232	26370630	25350424	28090282	33171230	15668232	18733358	20912398	15396444	19944424	25721892	75142904	39880556	28035088	25507850	37836272	23161340	21223980	38659440	25685866	80325728	31336468	27072320	38778736	16054404	20378982	26925746	19398580	21861386	19418230
1004	caproate (6:0)	Lipid	Medium Chain Fatty Acid	32489	LC/MS Neg	926	2713.7	115.076	142-62-1	8892	C01585	HMDB00535	6102585	6.36673e+06	7701153	4897503	3.21232e+06	5141560	10139318	5418299	6452207	5.58153e+06	5.37024e+06	8794608	3706469	2.93793e+06	4397759	3.9888e+06	4976082	7.34245e+06	8.01649e+06	9227833	3.3574e+06	4570680	5319844	3702479	4503643	7.09003e+06	6124541	13622641	4222030	4.19224e+06	4.10195e+06	3953754	5.20548e+06	4.40866e+06	4720200	4853694	3.94638e+06
1006	caprylate (8:0)	Lipid	Medium Chain Fatty Acid	32492	LC/MS Neg	932	4362	143.108	124-07-2	379	C06423	HMDB00482	8791714	4.04389e+06	11393517	5.32865e+06	6.69733e+06	4.22157e+06	63124240	9820629	8206796	4.48956e+06	8.20911e+06	9514891	3.44101e+06	5597652	5380760	2.08884e+06	7913715	8207955	29077876	10346490	5772808	6.53284e+06	10713086	5.94561e+06	6600706	13469084	23551712	34906188	6.88644e+06	6.76182e+06	10263715	11170864	4.9538e+06	6.99723e+06	5.57666e+06	10090912	2856509
1248	carnitine	Lipid	Carnitine Metabolism	15500	LC/MS Pos	100000007	688.9	162.112	461-05-2	10917	C00318	HMDB00062	771198464	876174592	948436160	1809305088	1065166336	4223010048	989791488	703387776	1662442624	924078080	1067032192	583338176	3629885184	540139520	898304320	2222507520	1552525184	1381090816	528959424	953254656	1120871936	1134518144	980127104	1383296384	1350237184	1160532480	1271466112	1460405376	1316372992	1101607168	856071232	1196607104	1324983296	1374447488	1274618240	1199370880	1335253632
409	carnosine	Peptide	Dipeptide Derivative	1768	LC/MS Neg	249	804	225.099	305-84-0	439224	C00386	HMDB00033	5.42526e+06	36400204	28921940	289106048	28974528	707864256	37615732	5645821	44635076	6.05849e+06	12005336	19008606	395751680	2.81138e+06	2395061	605593024	316605216	235826096	2.96444e+06	4516857	4890447	16104891	5.08411e+06	3.71027e+06	128437376	29185048	4.15765e+06	10045401	7807729	6203237		846751	479687	5.99861e+06	71712816	36548136	9217251
2700	catechol sulfate	Xenobiotics	Benzoate Metabolism	35320	LC/MS Neg	100001605	1906	188.986	4918-96-1	3083879	C00090	HMDB59724	893254	4.18631e+06	1.38367e+06	2146962	3.6031e+06	962980	1.22963e+06	678721	1.95874e+06	629203	434460	874247	3093891	1.09259e+06	1.45517e+06	127196	637568	366286	744932	644331	1.57394e+06	743049	1.47559e+06	2.12213e+06	816372	668654	376973	585343	623951	97149.2	373951	2139788	540143	576666		454440	233274
1391	chiro-inositol	Lipid	Inositol Metabolism	37112	GC/MS	100001859	1857	318.1	643-12-9		C19891	HMDB34220	34309.5	98050.5	22814.2		289323	89891.2	109468	120059	225875		99462.1		249188		50218.9		92947.9	91635.2	19860.9	110199	247978	18836.5		169690		348816	110723	114343		56343.3		154401		128647	99651.1
1840	cholate	Lipid	Primary Bile Acid Metabolism	22842	LC/MS Neg	136	5165	407.28	81-25-4	221493	C00695	HMDB00619	452965				313720		1.14297e+06					332307	285487	933790					977080					68972.3		501075			294844			135497	573623				1.56513e+06
1675	cholesterol	Lipid	Sterol	63	GC/MS	266	2316.9	329.3	57-88-5	11025495	C00187	HMDB00067	6.77596e+06	10223301	7.52044e+06	5983523	6.8855e+06	4541889	6.54173e+06	9168006	6677610	6.8437e+06	5.7332e+06	11105958	6.91376e+06	6.80031e+06	8735478	7.20097e+06	4.85652e+06	6.49626e+06	8022104	14007641	12316443	10893148	6191203	13718075	8159507	11492731	9000300	11704680	10593036	11226598	7.12818e+06	8452277	20745754	10136310	9472532	11558203	10866771
1417	choline	Lipid	Phospholipid Metabolism	15506	LC/MS Pos	1256	675	104.107	67-48-1	305	C00114	HMDB00097	839150336	769999168	1138185984	592355264	796067264	537049600	614691328	809374144	815448768	1561361664	810950016	521283936	622301376	573624512	722306240	562151168	500128192	522976448	742217152	838109632	707247104	789641152	803599808	659651584	999423616	1102830080	989703872	1143538176	1146927360	1160803072	935083264	592487104	837401856	820627072	813960320	859541824	634016576
1418	choline phosphate	Lipid	Phospholipid Metabolism	34396	LC/MS Pos	267	692.5	184.073	72556-74-2	1014	C00588	HMDB01565	398228672	219095760	493057376	72998120	107229064	52197640	147110496	194583376	78105104	822857664	195154848	103165320	62560384	401440672	588512704	49393036	73333352	53461540	150533856	177084096	139739232	108530576	220664080	84310560	185255248	341016672	245310592	2302388992	148641440	399556768	228536576	232209280	739709760	181389968	145081408	385769184	117274384
1026	cis-vaccenate (18:1n7)	Lipid	Long Chain Fatty Acid	33970	GC/MS	100001228	1987	339.3	506-17-2	5282761	C08367	HMDB03231	407331	366675	442025	407043	403129	354887	316158	474578	455244	518674	526632	377873	235009	181393	340806	312915	207648	453914	333370	1.8681e+06	1.87208e+06	1.13876e+06	627059	1.48327e+06	1.05055e+06	885464	953285	1273139	1.209e+06	1695714	869424	847258	1.15708e+06	651444	876822	384381	848770
979	citrate	Energy	TCA Cycle	1564	LC/MS Neg	1124	582	191.02	77-92-9	311	C00158	HMDB00094	131210848	371534176	198698480	128981024	296604384	48416816	256426384	381434912	268978816	875501696	215751440	383879488	100815944	291206400	249731584	187081616	76569088	69547848	162467328	91062496	104535272	47387944	128306976	38054592	63194828	58561880	166403840	40750224	100210888	209490432	107394096	711898496	35832856	65901908	127638552	51760060	90499704
329	citrulline	Amino Acid	Urea cycle; Arginine and Proline Metabolism	2132	LC/MS Pos	391	730.3	176.103	372-75-8	9750	C00327	HMDB00904	237862976	125623072	318265056	37911100	37894948	57125868	45169896	125155248	113563888	306673472	145824416	20239368	32533448	11226337	36728472	22418242	20830048	65201368	44118668	89407608	43085132	72780128	37840540	26798630	77937064	105094776	70686688	103000000	75059912	160080512	45794440	18336126	7.43405e+06	41015948	31640714	28121324	33180396
2598	coenzyme A	Cofactors and Vitamins	Pantothenate and CoA Metabolism	46322	LC/MS Neg	270	1448	382.55	85-61-0;18439-24-2	317	C00010	HMDB01423					567735	582323						652736	1.21689e+06	377556	215483	3.55287e+06	2023533	317379				352271	865581	1.60763e+06		386133					1422805	1.63817e+06	2280204	1.37366e+06	4718506	4.48175e+06	6.41982e+06
1756	cortisol	Lipid	Steroid	1712	LC/MS Pos	356	4561.9	363.217	50-23-7	5754	C00735	HMDB00063	2.34118e+06	4.12885e+06	2.44215e+06	6.13039e+06	1.88641e+06		661281	7.4633e+06	922394			1.40176e+06	2.58315e+06	792302	1572916	1.01773e+06	479787	2636213	531961	2.10692e+06	4.02896e+06	1509310	4037487	944630	638477	301756	6935452	218240	798483		884275	843838		2.26745e+06	1.95973e+06		456712
1761	cortisone	Lipid	Steroid	1769	LC/MS Pos	273	4407.9	361.201	53-06-5	222786	C00762	HMDB02802	160837		153711	183468					325047	1.23181e+06			139039							402873		1.18478e+06		807568				610307	375369			577379		153706			466789
2750	cotinine	Xenobiotics	Tobacco Metabolite	553	LC/MS Pos	848	1525.2	177.102	486-56-6	854019		HMDB01046	64265764	11779201	27054706	10288012	515750	14800315	630958	194520	550166		946459	32857080	1.03179e+06				45729768			49870472	9828054	20186826	10209700	371672	14751431	1858291					39870688					49435732	204572
353	creatine	Amino Acid	Creatine Metabolism	27718	LC/MS Pos	1221	771	132.077	57-00-1	586	C00300	HMDB00064	3095371520	3513259008	4388345344	6794545152	3843355392	17447131136	4213196800	2335911168	6430156800	4680359424	3641194752	2401997568	15911749632	1686633728	3369400064	12588453888	9751297024	6325511680	2052787712	6307490304	3603108352	6084119552	4479529984	4033547776	5155192832	4337124864	2276005376	3682597120	3225408000	2449185024	5605389824	3032582144	5930309120	5283792896	4506064896	4844464128	7589858304
356	creatine phosphate	Amino Acid	Creatine Metabolism	33951	LC/MS Polar	100000112	3831	210.029	922-32-7	587	C02305	HMDB01511	1.18684e+06	1.41549e+06	187124	696665	627917		274927	477589	228114		867554	3.4355e+06	289903	597779	281954	1.38452e+06	138689		304980	72572.9			131722		61367.9	122322		342394	215988	89972.6	207619			97519	178129	46215.9	46241
354	creatinine	Amino Acid	Creatine Metabolism	513	LC/MS Pos	275	730.8	114.066	60-27-5	588	C00791	HMDB00562	64952052	74354240	48480220	72703304	87444040	127538480	68647392	69641648	78805624	66535140	65488744	53356496	107717272	45320056	71086784	117099672	63722444	61843500	33879424	68477096	63419064	53334348	65220400	91743520	68351808	61751916	48010880	75121312	61610028	60566556	61558980	93038840	58338988	67190896	84997696	52759440	76482880
511	cyclo(pro-val)	Peptide	Dipeptide	49795	LC/MS Pos	100006065	2794	197.128	2854-40-2	98951			637929	1.22189e+06	963275	1.85853e+06	982155	506382	806984	696132	513148	392807	1.10764e+06	2.18188e+06	501162	690023	716358	1182103	596740	840620	485218	712970	2.24471e+06	925256	1.52875e+06	324223	736694	984860	621046	217594	442079	845970	2.49798e+06	501003	478637	621597	460064	1.00377e+06	507866
302	cystathionine	Amino Acid	Methionine, Cysteine, SAM and Taurine Metabolism	15705	LC/MS Pos	310	674.7	223.075	535-34-2	439258	C02291	HMDB00099		75813.4	434478																132443	1365278	6.14862e+06	2.70021e+06	2.95729e+06	319609	1.62764e+06	2706968		512113			800862	590720	159901	3.24939e+06			2.89362e+06
307	cysteine	Amino Acid	Methionine, Cysteine, SAM and Taurine Metabolism	1868	LC/MS Pos	800	736.4	122.027	52-90-4;56-89-3	5862	C00097	HMDB00574	4.01986e+06	4.17104e+06	12602653		372640		654022	809544	4369017	5064719	594135		33289092		2.95379e+06	15012174		294181		22226866	286283904	104018048	219112	5139092	12912617	405594	40350756	12088598	3744882	10606311		234672528	620668	3.66839e+06	17984242	13150154	532591
315	cysteine sulfinic acid	Amino Acid	Methionine, Cysteine, SAM and Taurine Metabolism	37443	LC/MS Neg	100002113	637.5	152.002	207121-48-0	109	C00606	HMDB00996		969638	370141					1150943			940684								151340	1.26702e+06	483783		7445846		923920	1.36089e+06	898595	3.78335e+06	1210135	1.34374e+06	2.73538e+06			1.84509e+06
380	cysteine-glutathione disulfide	Amino Acid	Glutathione Metabolism	35159	LC/MS Pos	100001437	824	214.051	13081-14-6	4247235		HMDB00656	3864052	64125504	12301388	21824948	6.68538e+06	7.70549e+06	20108626	6.89879e+06	22814670	11171381	10370870	9815338	20501098	8928289	18176764	38265540	2.8219e+06	9884671	10864098	78613008	272144384	113210592	12398975	13122378	79557544	9476186	11386437	7977352	22029580	1.70475e+06	7756315	28585270	12847038	6.16538e+06	29530164	7.72592e+06	9845435
383	cysteinylglycine	Amino Acid	Glutathione Metabolism	35637	LC/MS Pos	278	790	179.048	19246-18-5	439498	C01419	HMDB00078	1.49109e+06	3.73296e+06	2961584	251462		659821			1.53311e+06	3.45763e+06	240651	565127	1.55906e+06		911129	6834947	1.44362e+06	1.055e+06		945864	43483832	7902695	621355	2.68613e+06	1.5116e+06	666855	2315891	560268	587778	1.1147e+06	1.66507e+06	9567953	4.02885e+06	3.99318e+06	7161837	2.34662e+06	3.09122e+06
309	cystine	Amino Acid	Methionine, Cysteine, SAM and Taurine Metabolism	56	LC/MS Pos	279	675	241.031	56-89-3	67678	C00491	HMDB00192	22070568	24662160	30385338	454798	247755		451053	16995664	16853164	30043550	29953558		881743	868116	671318				528711	56970648	30682716	20648408			1.62864e+06		28944668	25136436	30551104	41431888		7057895
2543	cytidine	Nucleotide	Pyrimidine Metabolism, Cytidine containing	514	LC/MS Pos	827	1075.9	244.093	65-46-3	6175	C00475	HMDB00089	8.09697e+06	6514406	6109275	922212	2732179	863264	2.87683e+06	5201602	2.09614e+06	3062101	3.70337e+06	18298182	1.22399e+06	14736142	21786518	3.39573e+06	2045816	2.50557e+06	2.91831e+06	4677951	3.63114e+06	1.90833e+06	1.77693e+06	1412570	3.15927e+06	3.20589e+06	2.60962e+06	3.44285e+06	2678803	3.48218e+06	7377207	912520	2.35789e+06	13340309	1.79963e+06	315234	1.09843e+06
2542	cytidine 2',3'-cyclic monophosphate	Nucleotide	Pyrimidine Metabolism, Cytidine containing	37465	LC/MS Neg	73	937	304.034	15718-51-1	417654	C02354	HMDB11691	330368	634871	309942	615351	927493		534848	503955	982483		637228	3.80047e+06	412300	275590		1.44327e+06	368053	1.58198e+06	186242	711870	160618	141269		332884	432271	754348	293508			262364	349186	312122	196290		674351	179794	293888
2541	cytidine 3'-monophosphate (3'-CMP)	Nucleotide	Pyrimidine Metabolism, Cytidine containing	2959	LC/MS Pos	105	1203	324.059	84-52-6	66535	C05822		1437417	1.07622e+06	1.13366e+06	1.20803e+06	843171	756086	1.31958e+06	3.39686e+06	1.16648e+06		1.52201e+06	1.96189e+06	229815	1.38644e+06	681442	316112	469251	931476	655568	4.48284e+06	1.88206e+06	609069	669041	652707	2.55637e+06	3.76022e+06	2443933	1.44607e+06	730814	3.51362e+06	435238	1.04356e+06	1.17083e+06	276209	1.81126e+06	714368
1419	cytidine 5'-diphosphocholine	Lipid	Phospholipid Metabolism	34418	LC/MS Pos	1220	776.6	489.115	33818-15-4	13804	C00307	HMDB01413				2.29027e+06	3.44316e+06	5.30171e+06	1.76683e+06		3.46501e+06			1.52582e+06		1824604	4.58792e+06	11011084	2.99045e+06	5688742	2162191	24412760	29167020	20821636	29724938	20424028	25127494	43513536	15295997	16490957	2.45585e+06	5.0766e+06	33416854	14454965	51494744	31805376	36477652	26365022	36898388
2540	cytidine 5'-monophosphate (5'-CMP)	Nucleotide	Pyrimidine Metabolism, Cytidine containing	2372	LC/MS Pos	282	890	324.059	63-37-6	6131	C00055	HMDB00095	1.53851e+06	3.23284e+06	2.6393e+06	2.16595e+06	6774890	2.93692e+06	2.98234e+06	2531146	5.85012e+06	10933667	4.71493e+06	7496466	4535947	3441398	4693182	6340954	3.05082e+06	7.60001e+06	2.52691e+06	4.64914e+06	3.60336e+06	4.91404e+06	5117875	5256464	3.19235e+06	8554945	2.76168e+06	5387947	3.77747e+06	1.82454e+06	7.90273e+06	3.65202e+06	6.11603e+06	8430697	7.36046e+06	4161311	13787998
940	cytidine 5'-monophospho-N-acetylneuraminic acid	Carbohydrate	Nucleotide Sugar	36831	LC/MS Polar	1223	3900	613.14	3063-71-6	448209	C00128	HMDB01176	143700	386228	207135	181880	623688	309906	265314	259222	659722	1111451	461539	587362	384531	267270	364209	462922	179549	790345	222632	422262	254822	462405	486063	391027	241102	637657	247949	427092	359442	161375	430784	308958	592251	522468	736974	402160	1.73973e+06
1425	cytidine-5'-diphosphoethanolamine	Lipid	Phospholipid Metabolism	34410	LC/MS Pos	100001407	761.8	447.068	72842-05-8	123727	C00570	HMDB01564				1.38767e+06	11164292	2.39878e+06	1461204		1.61974e+06			2.98792e+06	5.04725e+06	1.58629e+06	3.76104e+06	6683960	2.83415e+06	3.91938e+06	667135	4802666	7373470	7695016	5.95756e+06	7.1692e+06	4297348	5781545	2704655	2888519		516804	5.99858e+06	4446947	13940069	6300333	5.49008e+06	7762651	11017736
1235	decanoylcarnitine	Lipid	Fatty Acid Metabolism(Acyl Carnitine)	33941	LC/MS Pos	100001251	4700	316.248	1492-27-9	10245190		HMDB00651	1.07879e+06	2199978	1.54374e+06	2.42931e+06	2300358	2.84129e+06	7591373	1.8908e+06	2.4489e+06	317093	3.77937e+06	3.7265e+06	10449108	1.24506e+06	1.34904e+06	8579119	6682652	2215808	3.70171e+06	760083	1.06332e+06	155684	2074957	866044	874358	2.05474e+06	943364	1.45885e+06	1.38705e+06	2.34141e+06	48199760	1.49503e+06	491564	4.18095e+06	1.30616e+06	1.70523e+06	2486598
2603	dehydroascorbate	Cofactors and Vitamins	Ascorbate and Aldarate Metabolism	34302	LC/MS Neg	301	739.6	173.009	490-83-5	835	C05422	HMDB01264		25086638	30296706		23807940	22608534	8345662	6.32439e+06	27246460	39335772	13058124	9667757	20318646	5795545	9303546	20297960	14635487	25080234	7.94686e+06	53008616	35288312	19868556	17625338	5111534	28961232	15416890	110305408	45096276	59726564	30716380	17341648	5210856	9465800	10965622	6529315	6.84556e+06	8263988
1766	dehydroisoandrosterone sulfate (DHEA-S)	Lipid	Steroid	32425	LC/MS Neg	100000792	4745	367.158	651-48-9	12594	C04555	HMDB01032	6.09826e+06	6.35053e+06	4650361	5.26893e+06	6143384	5.71492e+06	6463662	2138396	1.54988e+06	2.20098e+06	2.41476e+06	5090319	6986311	1.26608e+06	6.14462e+06	9532896	15557402	4.59312e+06	2.13973e+06	6.62585e+06	2.04396e+06	1.96514e+06	2960100	2.89488e+06	5049744	2381650	1.25142e+06	401262	2398204	843708	2.40166e+06	2.12244e+06	520916	4424603	4291569	7.38814e+06	1.94632e+06
1247	deoxycarnitine	Lipid	Carnitine Metabolism	36747	LC/MS Pos	100001662	742.4	146.118	6249-56-5	134	C01181	HMDB01161	40385132	63725488	46555072	134301984	70187704	230271968	71866144	42120560	108365880	47746692	57890620	38009740	164552688	28808192	45665976	169111936	94247600	74374776	56772328	72858112	120582552	63688692	81781776	110895096	118187624	112629840	112245880	126315744	100040664	98714632	87402688	93664128	132824440	67762080	166966560	104001408	64388592
1851	deoxycholate	Lipid	Secondary Bile Acid Metabolism	1114	LC/MS Neg	302	5294	391.285	83-44-3	222528	C04483	HMDB00626			3099837	5.2916e+06	1825433		7932137	4.84884e+06		388132	1133236		514769		1000179			1.3328e+06					1.21255e+06			2903779	914525			16768366							1.66515e+06
3231	desmethylnaproxen sulfate	Xenobiotics	Drug	46106	LC/MS Neg	100001788	2276	295.028		184679				666831				15474.2									137955					131975	298345				25354.1
1065	dihomo-linoleate (20:2n6)	Lipid	Polyunsaturated Fatty Acid (n3 and n6)	17805	LC/MS Neg	1231	5730	307.264	2091-39-6	6439848	C16525	HMDB05060	285089760	294060864	479467072	171753616	409345728	229228368	248978528	778753088	304191168	554271744	352085504	175066512	116950840	111918160	219176288	138856544	62515780	384094336	389524672	1808465152	3126074112	1775854464	593234752	913676352	950655936	598830080	1639275008	1265088640	1636062208	1329653376	584953216	690923264	722827392	699096960	1499862272	199764000	352957824
1060	dihomo-linolenate (20:3n3 or n6)	Lipid	Polyunsaturated Fatty Acid (n3 and n6)	35718	LC/MS Neg	100001739	5596	305.249	17046-59-2	5280581	C03242	HMDB02925	1172597888	946806080	1503232000	517633056	448906656	442694688	731033536	747391232	617640256	1303317120	669650752	390166816	196621248	226305984	482450784	170311376	114038824	448557600	334060128	2939024640	7037854208	1493686528	1293816192	995208768	1502215552	898403392	1617686016	2569856000	3382420480	1700270208	646852480	1231284224	1349672192	647698112	520680832	425024544	255264400
2629	dihydrobiopterin	Cofactors and Vitamins	Tetrahydrobiopterin Metabolism	35129	LC/MS Pos	100001506	1515	240.109	6779-87-9	1879	C00268	HMDB00038			205522		258855															1.02237e+06	909796	3.82765e+06	652768	423831	351852	557143	1323787	130111	465592	1.46564e+06	669837	292634	464292		3052141	332333
805	dihydroxyacetone phosphate (DHAP)	Carbohydrate	Glycolysis, Gluconeogenesis, and Pyruvate Metabolism	15522	LC/MS Neg	309	603	168.991	102783-56-2	668	C00111	HMDB01473	31968756	31425804	27832026	6.38348e+06	15861977	1.28143e+06	23266106	42910940	51489940	18817638	16736252	10901517	12473259	9902451	16431475	28569608	11730750	9067447	15222835	28881882	15242793	12904257	17655566	8613615	11862361	6.94777e+06	22897720	12854649	18902856	27057386	7777147	6960612	3.33117e+06	10614849	12879453	16405907	11371861
3485	dimethyl sulfone	Xenobiotics	Chemical	43424	LC/MS Pos	100004284	1035	95.0161	67-71-0	6213	C11142	HMDB04983		298320	166207				256671	162226					162208		79540.2			63339.7				332868		158626		348856				135487				123714			157820
336	dimethylarginine (SDMA + ADMA)	Amino Acid	Urea cycle; Arginine and Proline Metabolism	36808	LC/MS Pos	100001810	810	203.15	102783-24-4	123831	C03626	HMDB01539	25256794	114548024	54863884	43207356	68826368	18731774	28211684	129302408	79366864	30590308	73202376	35531308	15065308	14625543	11765146	16128414	8615981	25957606	22410166	195366992	256770560	115421792	79680856	34696528	103846840	70967872	256960720	293444864	279786176	212966960	38416040	24910890	56341272	41534644	40033252	24827082	37371848
5	dimethylglycine	Amino Acid	Glycine, Serine and Threonine Metabolism	5086	GC/MS	806	1030	57.9	1118-68-9	673	C01026	HMDB00092	561789	559307	754717	416767	837271	594198	458291	573198	743564	1.00233e+06	489825	1.0095e+06	1.07131e+06	1.33222e+06	379161	877412	547688	778595	1.72133e+06	620223	666165	797928	750999	853638	680477	590661	454611	842978	1.43868e+06	635260	951478	762268	2.08238e+06	666200	714283	649176	644641
3237	diphenhydramine	Xenobiotics	Drug	38669	LC/MS Pos	100002732	3863	256.17	147-24-0	3100	C06960	HMDB01927					756463	1.87836e+06				16438952	13008051			1.29477e+06					1941789					930069	2.00521e+06				7.73388e+06	20439956		1.82034e+06	8838977		441260
1064	docosadienoate (22:2n6)	Lipid	Polyunsaturated Fatty Acid (n3 and n6)	32415	LC/MS Neg	100001182	6034	335.296	7370-49-2	5282807	C16533	HMDB61714	19858526	49788592	40820644	19158336	38474136	22981750	20803098	86863608	23002478	80483528	30621864	21027064	8966987	11583694	16629774	31790708	4.68996e+06	40877864	79316440	224207616	718216704	308493408	91671440	98630568	171624096	115269552	208179536	174103056	406052384	246102544	257865280	89911080	75382448	84466568	433392800	42166528	66034656
1052	docosahexaenoate (DHA; 22:6n3)	Lipid	Polyunsaturated Fatty Acid (n3 and n6)	44675	LC/MS Neg	100000665	5525	327.233	6217-54-5	445580	C06429	HMDB02183	1067221056	781869248	1453834496	611770368	516123904	282674208	381210944	980786304	607787328	792983936	560746240	192893792	221217552	321953088	570852544	140678608	124439728	721490176	478001184	1694082048	2828412416	1530876160	1272628224	835406144	909537856	475758048	2294983424	1435310592	1316707456	1337320832	235138448	787905920	1188894464	720316224	496799008	403580192	386182848
1051	docosapentaenoate (n3 DPA; 22:5n3)	Lipid	Polyunsaturated Fatty Acid (n3 and n6)	32504	LC/MS Neg	100001181	5571	329.249	2234-74-4	6441454	C16513	HMDB01976	288109376	262803568	491302048	234815328	247422720	196834768	120179560	452001024	230268752	487566784	244499696	68516760	93263584	71443096	175298176	50730472	56547540	366210272	281543424	1181395200	2024375552	1235699328	554495936	479045088	519989152	229356752	1022317696	599894656	631470400	766050048	104384480	543227328	618991744	424956928	248858912	185511680	166016240
1063	docosapentaenoate (n6 DPA; 22:5n6)	Lipid	Polyunsaturated Fatty Acid (n3 and n6)	37478	LC/MS Neg	100001580	5624.5	329.249	25182-74-5	6441454	C16513	HMDB01976	72202528	85840152	128749848	77281960	83732136	88343168	144609456	81813216	82943576	184151040	113657912	53438912	49086908	33188468	34607944	17262330	28168292	47783284	85257000	448178944	1063054080	308428032	239562160	250472320	394836736	301092224	371627136	710139328	606440320	549969280	279068000	141777424	147813456	256918544	68445224	59797864	29955638
1053	docosatrienoate (22:3n3)	Lipid	Polyunsaturated Fatty Acid (n3 and n6)	32417	LC/MS Neg	100001195	5823	333.28	59708-86-0	5312556	C16534	HMDB02823	31181712	30455928	57399340	23983188	35818728	22067590	34007860	36798928	29426584	39748968	38406608	13169820	7005762		9796486	5412328	4502585	15514728	34231240	580472576	1034129600	269199296	120465160	57580444	67411584	137669072	139565936	534054016	358057632	225622032	275501216	70051600	62700616	211465248	86869368	34113360	17093220
1148	dodecanedioate	Lipid	Fatty Acid, Dicarboxylate	32388	LC/MS Neg	100001102	2990	229.145	693-23-2	12736	C02678	HMDB00623	756655	2182481	2580067	2.33026e+06	491320	496726	1.49097e+06	517847	495831	509640	651466	2566662	393647	189370	1.17935e+06	319901	567159	466063	341832	858861	620599	311328	713721	413264	593937	843057	407365	391062	345363	549796	1.29391e+06	274018	369719	1.14153e+06	489119	383971	278331
3487	ectoine	Xenobiotics	Chemical	35651	LC/MS Pos	100001635	823	143.082	96702-03-3	126041	C06231			321528	314650			658051	742182		864161			528150	632666	110231		958896	279790		445535	328723		233793	244635	284527		1.00695e+06		853583	177569	299785	1.75712e+06	314904			310036	280436	710878
1050	eicosapentaenoate (EPA; 20:5n3)	Lipid	Polyunsaturated Fatty Acid (n3 and n6)	18467	LC/MS Neg	2050	5450	301.217	10-2005-9;10417-94-4	446284	C06428	HMDB01999	339791808	232176688	610022592	430426240	138148688	128348752	70236736	324360192	144302816	249626928	133175272	42188316	77727456	77560720	267361792	49614480	73854040	480239968	156562656	591032320	977606400	377049632	601552576	186566304	171232464	82189544	454955136	471929760	344728000	270876288	53321092	262213024	264787408	243606288	85212768	180987520	137476080
1036	eicosenoate (20:1)	Lipid	Long Chain Fatty Acid	33587	LC/MS Neg	100001335	5950	309.28		5282768		HMDB02231	228594288	294223200	363915456	190109536	324830400	213347440	162089632	525442720	202879344	638626368	268137856	156868416	127152112	112223808	127501400	151098176	57014744	300701024	400385728	1753867136	2979028480	1212819968	504116736	863440832	765270464	502263936	980809088	573807232	1574132096	886109376	952219072	571154304	649492736	663340480	826946304	178614048	365681760
1769	epiandrosterone sulfate	Lipid	Steroid	33973	LC/MS Neg	100001287	4855	369.174	22229-22-7		C07635	HMDB00365	284149	738700	460284	813731	145656	667742	1.92625e+06	97720.4	73638.4	80290.9	974391	771683			1.49071e+06	577109	433786	421802	138847	265829	148110		390098		720499	611273			114617	313636	238461			1.18954e+06	318733	109839
2940	ergothioneine	Xenobiotics	Food Component/Plant	37459	LC/MS Pos	100002154	823	230.096	58511-63-0	3032311	C05570	HMDB03045	3.61675e+06	12083002	9740877	34520852	19427736	16663462	37007272	100648328	17293284	4.82219e+06	11493189	5357899	35412032	1.13328e+06	5837050	37677296	15572519	13007820	9110600	12273252	52764652	21587348	42264944	32937962	25848630	78621024	182865904	18144668	17918660	55519716	13011512	28426286	28178388	30433604	179030448	60759388	9978670
1040	erucate (22:1n9)	Lipid	Long Chain Fatty Acid	1552	LC/MS Neg	1087	6355.6	337.311	112-86-7	5281116	C08316	HMDB02068	32358940	43382244	71795848	60893400	59618536	23781722	24656644	122014008	32789766	79434984	43138136	24578048	16384938	20010034	42756852	28036128	15612487	53743536	104118152	487016960	537347840	220348688	136495856	238180336	114359552	109327936	229758176	203350416	399950368	160010784	388349664	112980944	133559032	232078608	139418880	52453584	102433008
2942	erythritol	Xenobiotics	Food Component/Plant	20699	GC/MS	100000846	1517.5	217	149-32-6	222285	C00503	HMDB02994	176799	300379	291478	258115	564773	351397	192558	222339	401975	411482	275188	261891	564020	389795	294377	433908	171500	241230	332295	345422	1018282	460750	396755	1.02662e+06	314412	385539	332821	420989	426819	437502	410549	994261	1.3346e+06	743356	474227	349867	527949
972	erythronate*	Carbohydrate	Aminosugar Metabolism	42420	LC/MS Polar	100001320	2186	135.03	88759-55-1	2781043		HMDB00613	27952302	60609776	56926144	40307892	80183320	32267338	32550362	37540688	55126964	57238488	35966388	37940628	45561212	32622886	44371216	70657064	25566726	42803428	36460496	87712744	152422736	72485280	74143656	97072744	74911704	81816072	112398000	99235800	66765840	67333312	68476064	89120856	164451568	103746712	105551944	59555556	89715264
1423	ethanolamine	Lipid	Phospholipid Metabolism	1497	GC/MS	420	1304	174.1	141-43-5	700	C00189	HMDB00149	2516375	4911940	9210034	2.1275e+06	13049291	3.30244e+06	2.88102e+06	7338489	7010139	8.30084e+06	5004020	1.70161e+06	7.1376e+06	1665472	3.4813e+06	4440705	3.46941e+06	5.3794e+06	7.02249e+06	21273674	23275714	28496798	10886979	28205968	22051786	23996110	26972710	16245870	35929812	24740638	12447013	21992948	51400040	20715466	22049136	9057762	6.48578e+06
277	ethylmalonate	Amino Acid	Leucine, Isoleucine and Valine Metabolism	15765	LC/MS Polar	2054	2785	131.035	601-75-2	11756		HMDB00622	3.49768e+06	6.1592e+06	18679484	3611996	5.04817e+06	8733176	3.58545e+06	4.43995e+06	7.93413e+06	12180815	4550067	5146922	5.47872e+06	4464212	5245669	12472360	7.42825e+06	4.797e+06	1.91939e+06	6.84869e+06	7.22023e+06	2.7014e+06	3.60182e+06	16989446	10639049	5045949	6276300	12529936	3.79122e+06	4.14369e+06	19771518	10667912	9942325	4105838	4514350	4264566	4.28463e+06
2592	flavin adenine dinucleotide (FAD)	Cofactors and Vitamins	Riboflavin Metabolism	2134	LC/MS Neg	327	2425	784.15	146-14-5;84366-81-4	643975	C00016	HMDB01248	1.4996e+06	1.11069e+06	1.84999e+06	1.38048e+06	1.84459e+06	1.38079e+06	963656	1.20695e+06	1.18216e+06	1.95425e+06	1.22153e+06	1365802	1.77483e+06	915555	1757954	2.00254e+06	1.91155e+06	1.51421e+06	678655	2.67074e+06	2537410	2.85173e+06	1915037	1.91853e+06	2.03533e+06	3.24799e+06	2.72635e+06	1794681	1.73696e+06	2.04207e+06	1.98432e+06	2.04025e+06	2.72936e+06	2.35961e+06	2.66228e+06	3.35692e+06	1769204
2593	flavin mononucleotide (FMN)	Cofactors and Vitamins	Riboflavin Metabolism	15797	LC/MS Neg	100000251	2390	455.097	130-40-5	710	C00061	HMDB01520	80239.3		104495	87237.6	106502	54938.7	69929.1	163261		161836	120258	142302	77586.9		97859.5	65578.1				136046	94926	123322	81925	31863	71573.7	91992.5	199797	50861.1	138972	101540	141366	63435.2	88160.8	105970	142696	110150	56564.3
900	fructose	Carbohydrate	Fructose, Mannose and Galactose Metabolism	48195	LC/MS Polar	878	2022.2	225.062	57-48-7	5984	C00095	HMDB00660	1509822	2.30067e+06	2.91574e+06	1.40795e+06	3.09295e+06	12782285	1.59993e+06	1609919	3031282	3.05181e+06	1.29683e+06	1.8615e+06	6.45841e+06	787608	1.59287e+06	2.47503e+06	1.57031e+06	959232	1.43718e+06	7531845	7797972	3.87189e+06	494922	5890312	1.92673e+06	698458	4.09845e+06	1.09163e+06	2002910	6.76983e+06	252135	5444006	7369507	1.05186e+06	1.03834e+06		157353
901	fructose 1-phosphate	Carbohydrate	Fructose, Mannose and Galactose Metabolism	15909	GC/MS	100000253	1983.1	445.2	53823-70-4	65246	C01094	HMDB01076	39031.3	69465.1	141100	17730.8	62350	4931.96	19286.7	81872.5	287647	111235	113804		52108.8		47062.5	14790.2	19510.1		13725.1	531523	163754	149598		173482	20785.2	32552.4	279328		97502.8	467008	8417.9	105561		24349.3	47184.4	36760	19617.8
800	fructose-6-phosphate	Carbohydrate	Glycolysis, Gluconeogenesis, and Pyruvate Metabolism	12021	GC/MS	1232	1994.9	315.1	103213-47-4	69507	C05345	HMDB00124	503903	1.1996e+06	1.28761e+06	168406	602960	4.4693e+06	793629	1.32503e+06	874424	1.58266e+06	736459	232169	1.66897e+06	60705.2	668968	490007	182890	84881.5	715783	2.53905e+06	3366613	1.4722e+06	170977	3.2549e+06	696601	747110	2274369	1.34672e+06	1.22472e+06	4.35154e+06	71891.3	2318821	4430035	820670	159219	106076
850	fucose	Carbohydrate	Pentose Metabolism	15821	GC/MS	918	1682.2	204	2438-80-4	19466	C01018	HMDB00174	550010	425005	2141627	187196	792643	305763	361093	342152	732690	2.40443e+06	678363	88188.4	431794	364490	554448	222678	153815	395592	284552	828790	1.00999e+06	1.28139e+06	343533	757235	1.08616e+06	1.26049e+06	770593	902856	628441	1.04802e+06	434881	552517	987111	480281	1127769	370670	490262
988	fumarate	Energy	TCA Cycle	1643	LC/MS Polar	330	3084	115.004	100-17-8	444972	C00122	HMDB00134	69648912	37033800	77378504	52238804	58278808	87319600	43467128	38463144	89544152	132771792	41966348	22872688	66425368	22696620	51184952	76181936	34989468	69665632	31361264	60395644	48481568	58778672	61506932	41901900	66183156	65917576	56542796	65429360	39829300	65274072	41996992	43703040	23724592	47284800	81895176	56382480	99626752
924	galactonate	Carbohydrate	Fructose, Mannose and Galactose Metabolism	27719	LC/MS Polar	100001026	3085	195.051	299-28-5	128869	C00880	HMDB00565		1.05355e+06	1.19659e+06	873877	3.55936e+06	1.9083e+06	603734	263423	2.29603e+06		1.64679e+06	715223	1.88679e+06	295629	700229	1.20029e+06		937772	2.39225e+06	3.28285e+06	6153277	24107614	4631219	9406694	6.27547e+06	6.49865e+06	8936027	7.56019e+06	11080821	7931207	3.69992e+06	9873544	5247193	9867547	17719224	7930890	13686225
917	galactose 1-phosphate	Carbohydrate	Fructose, Mannose and Galactose Metabolism	15706	LC/MS Polar	100000300	4552	259.022	19046-60-7	123912	C00446	HMDB00645	182703	521059	299516	379183	354635		304686	470500	441190	567826	278280	182158	553700	98616.4	206769	542989	287444	467247	149057	826827	868346	1.15273e+06	632570	1.3062e+06	789453	489914	1.72124e+06	377574	935188	840302	524424	1.25273e+06	2.46511e+06	1.06244e+06	786428	720762	595720
43	gamma-aminobutyrate (GABA)	Amino Acid	Glutamate Metabolism	1416	GC/MS	141	1539.7	304.1	56-12-2	119	C00334	HMDB00112	341549	145031	327282	41953.7	95152.3	32814.1	33751.4	176113	74768.7	203512	79297.6	30752	45548.2	28206.5	67055.5	91497.8	37520	58747.6	24554.7	244322	81264.4	175773	105187	116016	144888	134408	175256	310813	193394	296983	35814.1	77844.6	71761.2	180393	170235	171424	160782
393	gamma-glutamylalanine	Peptide	Gamma-glutamyl Amino Acid	37063	LC/MS Pos	100001843	1116	219.098	5875-41-2	440103		HMDB29142		1602604	641669	2.20562e+06	1.74249e+06	900130	1.83994e+06	710537	1.8489e+06	1.27628e+06	735758	1.29875e+06	1.86364e+06	453127	965449	2.67876e+06	949476	1622217	886614	2.98481e+06	3.09134e+06	1.84328e+06	2.14273e+06	296386	2970876	2.2451e+06	2.51568e+06	1622217	1651860	1.13672e+06	1.54218e+06	610009	586556	3.15014e+06	5.11489e+06	2.02689e+06	2.02204e+06
394	gamma-glutamylcysteine	Peptide	Gamma-glutamyl Amino Acid	1778	LC/MS Pos	1036	1263.5	251.07	636-58-8	842	C00669	HMDB01049			657512	3.35378e+06	1.19847e+06	2.05633e+06	1.27731e+06	337158	717526	1.59483e+06		5717263	3679905	1.22816e+06	630418	2.80645e+06	2134508	2.5831e+06	807292	2.5509e+06	24269322	3202042	1903881	3.53783e+06	6.20058e+06	1.2471e+06	2232516	1.32521e+06	1.55003e+06	2.29449e+06	2288073	6199538	3920827	4.01558e+06	6.06834e+06	4305145	1.46437e+06
395	gamma-glutamylglutamate	Peptide	Gamma-glutamyl Amino Acid	36738	LC/MS Pos	331	1045	277.103	1116-22-9	92865	C05282	HMDB11737	6.24071e+06	9248758	7830397	4274271	5.48999e+06	375952	5676317	14411894	7.73025e+06	6.46706e+06	15758660	3.34889e+06	2.53672e+06	1336278	3.56434e+06	3.34359e+06	1.22851e+06	1.64562e+06	3.88154e+06	9627985	10581710	11236479	8.11268e+06	7879162	11102646	9617904	17032004	22159796	30497480	18722324	4525847	9422593	5.84846e+06	15915306	17477184	12712804	7.8597e+06
396	gamma-glutamylglutamine	Peptide	Gamma-glutamyl Amino Acid	2730	LC/MS Pos	1140	817.9	276.119	10148-81-9	150914	C05283	HMDB11738	1.14141e+06	10417947	3651176	22867468	11972754	5.16533e+06	14913934	3313035	6360155	3.52717e+06	4.60667e+06	18982236	11981077	4686451	5985389	11508559	7.72228e+06	10910308	5410621	7.09208e+06	15659160	6.84825e+06	5332439	5269280	14311123	9861779	7.19063e+06	3409210	6221861	4236084	5365115	6.11334e+06	7378907	13642216	21041946	8454917	7077099
399	gamma-glutamylisoleucine*	Peptide	Gamma-glutamyl Amino Acid	34456	LC/MS Pos	100001485	2661	261.144		14253342		HMDB11170		1.12213e+06	1.73799e+06	192760	707418			1.41481e+06	1.51748e+06	1.71291e+06	1.34714e+06		307103			517713		306125		6.36918e+06	7893298	6941586	1.82793e+06	1.54866e+06	3.02612e+06	2.24414e+06	7.19448e+06	9632415	5740563	5.68956e+06	914545	1.21603e+06	1.08831e+06	1.7739e+06	2.85983e+06	921113	1755946
400	gamma-glutamylleucine	Peptide	Gamma-glutamyl Amino Acid	18369	LC/MS Pos	1268	2757.2	261.144	2566-39-4	151023		HMDB11171	5.03922e+06	6.44399e+06	9987925	2.98393e+06	4.84479e+06	1.27454e+06	2.56772e+06	8687341	8688036	7590566	8737344	1.47971e+06	2.70674e+06	172235	2.32844e+06	2293546	1.19152e+06	2254207	1.67253e+06	22428564	23269624	22457718	6340245	5.85718e+06	7.80852e+06	8364671	21796072	30738520	19729830	24169424	3.22489e+06	4.941e+06	3165723	7200490	7.16825e+06	3.66151e+06	5204889
402	gamma-glutamylmethionine	Peptide	Gamma-glutamyl Amino Acid	44872	LC/MS Pos	100001313	2016.5	279.101	17663-87-5	7009567		HMDB29155		745651	340027	877161	755062	107619	839615	463387	931929	302168	613278	429579	361803		416384	158156		551653	470966	3.03254e+06	4.0117e+06	2.22168e+06	1.2094e+06	893333	2.05432e+06	1.88217e+06	2.4576e+06	1.55187e+06	1415161	1167781	615666	994318	415799	2.2819e+06	1.74927e+06	538045	621156
403	gamma-glutamylphenylalanine	Peptide	Gamma-glutamyl Amino Acid	33422	LC/MS Pos	100000491	2865	295.129	7432-24-8	111299		HMDB00594	1.17671e+06	1812941	2.77038e+06	822732	1.51709e+06	305470	857732	2290815	2.52994e+06	3577032	2.40505e+06	374415	831682	221519	712888	424983	286562	746396	520969	8024212	9185128	7.23752e+06	2.32297e+06	1.86919e+06	3256088	3.33566e+06	6673030	10104540	5561083	6.55581e+06	1251583	1.3873e+06	1.1316e+06	2.40501e+06	2431623	1.30212e+06	1890660
404	gamma-glutamylthreonine*	Peptide	Gamma-glutamyl Amino Acid	33364	LC/MS Pos	100001314	996.6	249.108	5652-48-2			HMDB29159		809654	956773	519368	532266		723827	978642	1.65574e+06	1024851	1270213	349507	251923		227908	473024		444884		4699568	4859324	3.68517e+06	1366958	931690	1.72855e+06	1.62021e+06	3.01001e+06	5365279	2.80493e+06	2.72482e+06	726606	678086	295196	1.23099e+06	2.01719e+06	592130	861965
406	gamma-glutamyltyrosine	Peptide	Gamma-glutamyl Amino Acid	2734	LC/MS Neg	1102	1240	309.109	7432-23-7	94340		HMDB11741	376843	433217	610734	203562	471943	73562.1	323328	584988	716575	1.12683e+06	1.02154e+06	152970	209890	72767	216550	151772	84566.1	176153	224507	1995031	1.63196e+06	2.10268e+06	770583	413507	897461	888042	1.62901e+06	2.32292e+06	1.23215e+06	2.09646e+06	243656	503624	257099	785306	818187	403703	389151
407	gamma-glutamylvaline	Peptide	Gamma-glutamyl Amino Acid	43829	LC/MS Pos	100001126	2045	247.129	2746-34-1	7015683		HMDB11172	1.3236e+06	2.79632e+06	3995364	1.49092e+06	1947204	775909	1.09115e+06	2.94505e+06	3646267	2.3839e+06	3.11488e+06	783916	1.68894e+06		958926	2.44045e+06	825487	1.02376e+06	495147	11607076	11975678	12042090	3.39693e+06	3.82227e+06	4.53732e+06	4026831	11031924	15480080	9468357	10408243	2236102	2.66314e+06	1756576	4.6461e+06	5784075	3.12929e+06	3613444
2874	gluconate	Xenobiotics	Food Component/Plant	587	LC/MS Polar	338	2922	195.051	527-07-1	10690	C00257	HMDB00625	1.63383e+06	2785924	1.07794e+06	1.35307e+06	2.07361e+06	3.48909e+06		27466974	1.23181e+06	4691367	1.89875e+06	1.01139e+06	981060	671496	1218359	1.165e+06	691724	1.4594e+06	1.98723e+06	3.5847e+06	8065086	18959480	1.60053e+06	13151661	3.5847e+06	1.64042e+06	10005075	2.10952e+06	8502614	4.02272e+06	1.89439e+06	6.00647e+06	15243158	2943665	1.39206e+06	3.94811e+06	4225185
945	glucosamine-6-phosphate	Carbohydrate	Aminosugar Metabolism	580	LC/MS Polar	290	4521.5	258.038	3616-42-0	439217	C00352	HMDB01254	239755	886852	1.37179e+06	332427	634925	9946710	1.03813e+06	1.90974e+06	446110	3.22126e+06	1200361	336264	2.58212e+06		660466	1788347	755613	308333	720662	3.77302e+06	8086488	1.8997e+06	376086	5.60744e+06	2082098	1498693	6390154	2.95881e+06	3.19463e+06	4362163	180865	2678998	7.58581e+06	2.07809e+06	515186	166344	211577
796	glucose	Carbohydrate	Glycolysis, Gluconeogenesis, and Pyruvate Metabolism	48152	LC/MS Polar	572	2342	225.062	50-99-7	79025	C00031	HMDB00122	184493856	194859680	53060740	112513912	23384170	164619200	41574124	93861152	86614296	64943644	89247664	94705720	78958280	30715512	103956256	55356760	23215610	34152140	22494866	111378968	119109320	57478044	16028906	39621540	22925546	17850550	41059392	10765823	31965890	59246876	16212567	42699960	67717200	11101533	4750321	3.21736e+06	1908305
797	glucose 6-phosphate	Carbohydrate	Glycolysis, Gluconeogenesis, and Pyruvate Metabolism	31260	LC/MS Polar	291	4537	259.022	103192-55-8	5958	C00668	HMDB01401	451057	2.0727e+06	3.73343e+06	1.04697e+06	1.6785e+06	17386570	2.20855e+06	4.10977e+06	1081297	6.31385e+06	2.89168e+06	896233	5216443	98972.2	1.3121e+06	3125552	1.89407e+06	863847	1.45587e+06	5019362	13137061	3.22277e+06	1.26308e+06	12625887	3.85196e+06	2145294	7856715	3.96472e+06	5825058	6939295	655481	4996297	10267703	3957817	1.18258e+06	435105	695225
949	glucuronate	Carbohydrate	Aminosugar Metabolism	15443	LC/MS Polar	100000257	3233.3	193.035	207300-70-7	444791	C00191	HMDB00127	1.08059e+06	2.13124e+06	1.8655e+06	1.04469e+06	2.62869e+06	645201	1.10348e+06	1348604	1.1565e+06	723199	1.08147e+06	1.17564e+06	1.43541e+06	1.45298e+06	1.08695e+06	525574	885621	1.71617e+06	1.86351e+06	2.05731e+06	2.45382e+06	2.24338e+06	1167422	4.50569e+06	1797663	1663509	1.82085e+06	1.31078e+06	3.28441e+06	2.15063e+06	1497278	2.99346e+06	1.64622e+06	2.07476e+06	2615938	1.09149e+06	2.61909e+06
943	glucuronate 1-phosphate*	Carbohydrate	Nucleotide Sugar	52312	LC/MS Neg	100001585	560	273.002	13168-11-1		C04037,C01195,C05385	HMDB03976	5353360	7835805	6430212	2.2256e+06	2.32931e+06	374709	3.04917e+06	6.51878e+06	4548018	7.09052e+06	4799429	4172163	531139	1.56076e+06	3.84334e+06	837376	323785	1.201e+06	791188	6587705	12063888	2.80315e+06	4.04675e+06	2.27785e+06	2.06885e+06	3.33123e+06	15878044	6275744	5.71908e+06	7.09501e+06	2.96232e+06	2.73534e+06	2.64329e+06	7806147	2.74077e+06	1.59708e+06	1.01911e+06
38	glutamate	Amino Acid	Glutamate Metabolism	57	LC/MS Pos	561	710	148.06	56-86-0	611	C00025	HMDB00148	469716928	737451840	813927296	537405888	914119680	401495296	602249152	1135926144	1055353152	1384236672	935142208	521876000	444175808	267156608	486518848	879393856	348504256	751373952	670498176	2227749120	3002365696	2487303680	1859453952	2491247616	1891413888	1648655488	3255100672	2961327616	2494429952	2213361152	1196615552	2509912064	2675596544	1851865856	3168672768	2284104192	2752085248
48	glutamate, gamma-methyl ester	Amino Acid	Glutamate Metabolism	33487	LC/MS Pos	100001103	1068.8	162.076	1499-55-4	68662			9567493	12832881	27281054	23425758	153027392	26291646	48902316	7.57512e+06	44215216	16592936	9716581	54080772	98316752	14120351	76383688	145269168	109364216	125056640	33555468	105571336	203994016	157405536	209391584	242090224	131969352	180136320	34781576	60433564	13265035	24833504	198527744	270527360	212337056	311424800	276017056	392629088	256442144
39	glutamine	Amino Acid	Glutamate Metabolism	53	LC/MS Pos	563	680	147.076	56-85-9	5961	C00064	HMDB00641	899862848	1078503552	1192277504	1267548288	1406582400	1604003456	1057757888	1230935424	1297150848	1323406336	1144083840	984501824	1727616384	559536576	903869440	1695549824	1099249408	1271151744	625527552	1126756352	1297110144	1636164608	802286592	855390208	1063402944	1256383744	1569813248	1119218048	1078440320	1456281216	644651904	883768896	1013076736	962895296	1771012096	684227264	1536857216
522	glutamine-leucine	Peptide	Dipeptide	42994	LC/MS Pos	100003160	2195	260.16							166551		569905	1009471			316110	109080			715679	2134076	3.93566e+06			1.421e+06		1009471	5018049	1.21899e+06	552009	3.07779e+06	753381	1.31179e+06	1.06577e+06	1.12804e+06		161824	1.56921e+06	3.82887e+06	18853138	1.01839e+06	636265	170412	1383834
83	glutarylcarnitine (C5)	Amino Acid	Lysine Metabolism	44664	LC/MS Pos	100001593	1583.3	276.144	102636-82-8	71464488		HMDB13130	624394	1.84784e+06	479890	1.45865e+06	2.06454e+06	999908	1.11413e+06	1.02689e+06	1.86098e+06	1.07419e+06	2.16956e+06	1389719	2.80991e+06	3.28143e+06	1.04123e+06	2.35884e+06	540130	1.33155e+06	832201	493860	694559	269913	585687	933336	721457	778904	366938	411745	660205	1.27915e+06	748225	867630	792548	683379	708581	298643	385210
378	glutathione, oxidized (GSSG)	Amino Acid	Glutathione Metabolism	38783	LC/MS Pos	448	1512	307.083	103239-24-3	65359	C00127	HMDB03337		6209457	1.53452e+06	99965296	156732272	129379696	187340080	504474	6.25947e+06		749257	198728224	108560672	36298580	208600160	148101296	147522960	79356696	67358712	39206604	103054968	285855520	255520032	160475616	116545208	299691648		750426			177379712	75990720	163367552	257353376	185041888	107803544	143657024
377	glutathione, reduced (GSH)	Amino Acid	Glutathione Metabolism	2127	LC/MS Pos	496	1270	308.091	70-18-8	124886	C00051	HMDB00125	1753811	3330178	8765773	102812744	201539344	266485344	74969520	459958	8833756	2857050	934876	223917584	486106624	55414188	72455384	790942336	446493632	319247968	52109228	29441266	456884992	331989824	526649664	983847808	266764608	599787520	3055460	4.01828e+06	2794167	697474	956781056	1056206144	1138957568	1554152576	1571560704	794110464	1005023552
816	glycerate	Carbohydrate	Glycolysis, Gluconeogenesis, and Pyruvate Metabolism	1572	LC/MS Polar	1052	2070.4	105.019	600-19-1	752	C00258	HMDB00139	65691012	94085256	127361632	50014032	48826392	66837360	36903004	78715944	83068552	110466560	36834080	30369210	58239136	27760802	47621420	67504312	42438548	70534024	39800256	122765664	89095808	114110608	36191896	73634912	64609048	40575792	108937472	127665440	123631456	67998376	31188144	67010252	77957496	39343728	45142720	20655876	28599276
1594	glycerol	Lipid	Glycerolipid Metabolism	15122	LC/MS Neg	1254	758	91.0401	56-81-5	753	C00116	HMDB00131	86806560	78422864	163334064	77323752	36707724	341123776	74578848	58121292	117583544	267618880	76731168	41027008	87289336	28855480	94940216	174503184	89865768	93766896	24404486	144679088	266051824	154930960	65164368	102139032	233263280	107011600	121200384	99118824	173387360	131433848	77487664	104664496	179581264	92200224	142551776	57324020	38289036
1595	glycerol 3-phosphate	Lipid	Glycerolipid Metabolism	43847	LC/MS Polar	100000258	3938.7	171.006	29849-82-9	754	C00093	HMDB00126	396009	197375	255946	20802570	430556	837867	1.28696e+06	210364	328039	320342	486775	7629918	31666662	3.78817e+06	3453241	77634448	65745288	2.70166e+06	370937	143062	214393	60224.9	332968	561068	272471	230459	165964	737381	266199	168273	4.58052e+06	2099073	132289	283757	2.58287e+06	1806916	854416
1426	glycerophosphoethanolamine	Lipid	Phospholipid Metabolism	37455	LC/MS Pos	100001620	705	216.063	33049-08-0	123874	C01233	HMDB00114	3883836	5.3884e+06	9280741	13062291	10101869	28943598	8720358	5.5525e+06	8689369	12167148	3.58479e+06	8783936	25423706	5561439	8.31781e+06	11247669	9050198	15586731	4443863	16900610	58047032	21652898	7.79665e+06	27255964	18878606	9556147	20279168	4608009	5186962	8441698	34269516	30261028	236390192	10438271	10270070	17676414	7.94679e+06
1600	glycerophosphoglycerol	Lipid	Glycerolipid Metabolism	48857	LC/MS Polar	100001619	2430	245.043		439964	C03274		2.9461e+06	2.76487e+06	4.5072e+06	1.781e+06	5.63283e+06	2.54739e+06	1.64899e+06	3.00313e+06	6.94958e+06	8484495	2.48614e+06	1.06932e+06	3.64729e+06	1.272e+06	2.41873e+06	2612163	1.92234e+06	2.833e+06	1.73605e+06	10832745	26815232	11643283	7720274	10593827	9287934	9280390	14721561	6.74019e+06	6.95344e+06	9567899	11915030	12537183	33795020	6692323	7201344	6.57283e+06	5.38732e+06
1428	glycerophosphoinositol*	Lipid	Phospholipid Metabolism	47155	LC/MS Polar	100001621	3850	333.059	16824-65-0				1.40874e+06	1.52338e+06	4.21741e+06	1.20648e+06	3548045	2.78055e+06	1.65688e+06	1.55643e+06	2.2688e+06	7.39361e+06	1.51196e+06	856801	2.27182e+06	1.8317e+06	3.72338e+06	2727808	1.51185e+06	1.98909e+06	2.02156e+06	6812391	11346864	9778306	8558394	9117703	13761135	10706882	7007452	11025287	6.84076e+06	5406109	7180869	9780858	20249470	12825416	23811942	5.10568e+06	9204481
1420	glycerophosphorylcholine (GPC)	Lipid	Phospholipid Metabolism	15990	LC/MS Pos	100000269	709.9	258.11	28319-77-9	71920	C00670	HMDB00086	18665262	56651484	71698712	168550688	76447208	366240064	63260236	46546876	108310240	120193536	26527592	80403200	259218480	81880664	64094292	154874608	81033952	142514272	40353160	162155200	408551840	149222496	43195976	155659744	136214784	56454292	166374560	30340590	27854882	40907892	271524288	186907312	1395949184	65263016	69167232	152847872	56836416
1	glycine	Amino Acid	Glycine, Serine and Threonine Metabolism	58	LC/MS Pos	340	700	263.147	56-40-6	750	C00037	HMDB00123	25731688	32765566	32162846	19779190	24058986	14017202	18751648	39710432	27773230	35558160	31032558	16925278	17206128	21984972	22637776	14411355	9791561	17351394	32910502	49411760	50258280	45721324	51108812	34445204	38475348	28951742	37157556	44179328	44000712	41946376	30631202	37844592	23432538	41435448	29609754	26968108	25366204
1844	glycochenodeoxycholate	Lipid	Primary Bile Acid Metabolism	32346	LC/MS Neg	1628	5236.1	448.307	16564-43-5	12544	C05466	HMDB00637	1.95885e+06	744934	1.27646e+06	1.40718e+06	7.19307e+06	902622	4421366	1.17723e+06	559066	920358	8.27774e+06	5254619	3.11133e+06	6749984	837945	420964	236137	20315606	9606514	521214			555487	2.50117e+06	695851	1070950	750944		1.92226e+06	983856	2.81016e+06	3.71588e+06	3289219	366009			14719926
1841	glycocholate	Lipid	Primary Bile Acid Metabolism	18476	LC/MS Neg	342	5163	464.302	475-31-0;863-57-0	10140	C01921	HMDB00138					3.14183e+06		937775	430037		272781	1.49424e+06	420055	1.45036e+06	3643882	233488			33232248	4.04591e+06					1.09377e+06	159121	367422	902305		524956	239641	863506	1.36354e+06	1.76124e+06	102979			15822959
1880	glycocholenate sulfate*	Lipid	Secondary Bile Acid Metabolism	32599	LC/MS Neg	100001989	4750	254.623					676748	960361	3152405	1.1173e+06	2.32388e+06	922708	3.25933e+06	1.05359e+06	885361	706337	3.15164e+06	1.38485e+06	2.09953e+06		360720	893516	677252	3.50899e+06	344914	794179	209730	815877	272507	1.01521e+06	1661543	1.20566e+06	315835		815638	1.13899e+06	401999	1.38421e+06		419234	622434	356073	794418
1852	glycodeoxycholate	Lipid	Secondary Bile Acid Metabolism	18477	LC/MS Neg	100000436	5281	448.307	360-65-6	3035026	C05464	HMDB00631			1082812	447920		188701	3.31966e+06	882926		275675			455997		384395		52173.1	17145950	1106376	134209			476394	183103	470159	1.39451e+06	715421		636304	382629	900373			241763			12296125
1858	glycolithocholate sulfate*	Lipid	Secondary Bile Acid Metabolism	32620	LC/MS Neg	100001657	5011	255.631	15324-64-8	72222	C11301	HMDB02639	407548	438393	3.14788e+06	978622	1.02831e+06	1.03731e+06	5.68909e+06	1.09765e+06			1.25476e+06	303934	696362		714419		230400	1.34171e+06		306057		855413	599330	278631	909544	1.60014e+06	275390			225525				368770			696362
1863	glycoursodeoxycholate	Lipid	Secondary Bile Acid Metabolism	39379	LC/MS Neg	100002911	5033	448.307	64480-66-6	12310288		HMDB00708					794312		256930	254604		128476	103921	364092	269118			115312		1.35179e+06						143331					270769		163676	401207					790033
534	glycylisoleucine	Peptide	Dipeptide	36659	LC/MS Pos	100001790	2080	189.123	19461-38-2	88079		HMDB28844		232004	341597	1.08922e+06	2072590	1.57896e+06	789630	89720	2.00952e+06	573795	552708	266379	1.02652e+06	192142	971456	566042		2.80046e+06	416040	3.1148e+06	18044382	6.71613e+06	2889193	4.08679e+06	3.95564e+06	4.94871e+06	3.14602e+06	2.42611e+06	1.14441e+06	1.00336e+06	5.57595e+06	4.65321e+06	5937066	4.4305e+06	3.87917e+06	3.57259e+06	2.52184e+06
535	glycylleucine	Peptide	Dipeptide	34398	LC/MS Pos	100001258	2190.9	189.123	869-19-2	92843	C02155	HMDB00759	430626	2.54954e+06	2.77194e+06	7553011	21706820	12502849	3.96874e+06	916882	13961830	4023221	2.24382e+06	1.06947e+06	9468143	1.50038e+06	3.9335e+06	2.77846e+06	1.69435e+06	15773965	4.64302e+06	33599528	147938256	61734568	17966424	47856120	30047446	23893700	18565538	11658588	9694566	7.14754e+06	18411362	55649872	35495492	38718408	14666306	11277160	9610269
545	glycylvaline	Peptide	Dipeptide	18357	LC/MS Pos	100000487	1561.6	175.108	1963-21-9	97417		HMDB28854		1.49603e+06	1037782	3.29172e+06	3082938	2.20338e+06	1.57624e+06	291340	6342782	789554	1.41614e+06	1.03608e+06	1.17041e+06	121298	1.07113e+06	491495	195738	3.05452e+06	1180887	8468868	26965962	9049910	4.59569e+06	3999720	5137013	6.33913e+06	8410783	3622380	1.57023e+06	1.56575e+06	11204862	4516030	5.9309e+06	5199401	3.85167e+06	1.58913e+06	2.41058e+06
359	guanidinoacetate	Amino Acid	Creatine Metabolism	43802	LC/MS Pos	344	711.2	118.061	352-97-6	763	C00581	HMDB00128	10196776	7.17834e+06	14654419	1.1812e+06	5.44569e+06		2.72313e+06	14478361	1.91287e+06	6.85925e+06	3.06291e+06	3.95082e+06	644925	8406894	7.66547e+06	2.72313e+06	571111	668002	461734	7396653	1.86562e+06	5.5619e+06	13150057	469766	7013269	9184439	5.51552e+06	7.81546e+06	1.69424e+06	5901840	902081		1.56994e+06	1.32681e+06	624964	2.34089e+06
2485	guanine	Nucleotide	Purine Metabolism, Guanine containing	32352	LC/MS Pos	172	1035	152.057	73-40-5	764	C00242	HMDB00132	4545054	14615950	2373421	30400722	147171056	5.524e+06	21768606	4573997	212764896	90311408	10016794	83091896	15236604	38438048	24119408	89653672	7037701	41905544	47438364	4.76693e+06	27514376	947126	14261175	175268256	49064324	14782831	91511808	424166848	255794000	215919216	80864288	131763952	353369568	7.14481e+06	460962560	114290216	124690520
2484	guanosine	Nucleotide	Purine Metabolism, Guanine containing	1573	LC/MS Pos	1099	1680	284.099	118-00-3	6802	C00387	HMDB00133	17170846	36741536	17199344	26531962	84529040	49348792	28374542	24493676	85501592	35342524	25273386	49163180	35827664	36939924	44762452	57904192	29036070	77343264	26659750	52247764	82124360	12250690	60270344	86808896	40117912	46449816	24287156	67070276	16328557	34554880	50430516	69820720	138426064	55072136	195549264	81802472	59079316
2502	guanosine 2'-monophosphate (2'-GMP)*	Nucleotide	Purine Metabolism, Guanine containing	52442	LC/MS Neg	100002733	1241	362.051		444571			7.09072e+06	63923636	11479211	12587607	6.5735e+06	1.16147e+06	11139213	54530360	52295080	1.33288e+06	33020206	36549580	2.21571e+06	636448	1.66568e+06	9236586	4.72724e+06	21363312	460952	9511510	5969201	2.29203e+06	1962421	1.10969e+06	2.8095e+06	1.81397e+06	4260783	1.39581e+06	1.01458e+06	3.73572e+06	81744.5	1.33771e+06	2.59148e+06	198796	1.14562e+06	1.21058e+06	6.46686e+06
2480	guanosine 3'-monophosphate (3'-GMP)	Nucleotide	Purine Metabolism, Guanine containing	39786	LC/MS Neg	100002704	773.9	362.051	117-68-0	3522			808533	5508169	3.45288e+06	1.77003e+06	1.07221e+06	647634	1.4469e+06	7.14076e+06	3.77608e+06	1.15686e+06	2.88835e+06	795311	164515	633336	192471		137436	3.80893e+06	1.65816e+06	18104034	13845100	3853322	2.13305e+06	1.13441e+06	13911659	12376888	23030226	2.25269e+06	8469774	12756266	351085	1.24202e+06	2.01445e+06	377478	3.06744e+06	1.32856e+06	1.05864e+06
2479	guanosine 5'- monophosphate (5'-GMP)	Nucleotide	Purine Metabolism, Guanine containing	2849	LC/MS Pos	347	1300	364.065	5550-12-09	6804	C00144	HMDB01397												686436	4.62311e+06			7388531	3.7767e+06	789090					340604	685947							3333065	1242456	12535242	120762		2.88943e+06	20499208
935	guanosine 5'-diphospho-fucose	Carbohydrate	Nucleotide Sugar	15903	LC/MS Neg	335	755	588.075	15839-70-0								201255							109256											177203			376303					256503		198230		501624	849519	630702
2607	gulonic acid*	Cofactors and Vitamins	Ascorbate and Aldarate Metabolism	46957	LC/MS Polar	100001586	2750	195.051	20246-53-1	9794176			2.9956e+06	6295094	9797270	7882194	17414980	8.08207e+06	7352592	6.60036e+06	12961184	11533871	8.32174e+06	7.61844e+06	9893025	4.13011e+06	7315742	8293412	3.34075e+06	14703867	5292703	56940516	73063000	111716984	29930300	71256944	66421160	28406712	59623776	46568084	41297384	21875780	26897514	68402816	58587204	40224872	192220336	31056558	162993088
2642	heme	Cofactors and Vitamins	Hemoglobin and Porphyrin Metabolism	41754	LC/MS Pos	100001386	5003	616.176	14875-96-8	26945	C00032	HMDB03178		460306		1.51535e+06			915104	1174049	4631238		4118622	5125293		506416	1.07203e+06	570115	1.27606e+06												1.1998e+06
1005	heptanoate (7:0)	Lipid	Medium Chain Fatty Acid	1644	LC/MS Neg	925	3670	129.092	111-14-8	8094	C17714	HMDB00666	3729879	3.93605e+06	3.72627e+06	3.93733e+06	2.93819e+06	3.75585e+06	3.14869e+06	2.86605e+06	3037204	3978369	2782837	5942301	2.65999e+06	2.47154e+06	3.42695e+06	2951204	5.16472e+06	3.11245e+06	9740424	4.73529e+06	1.87617e+06	3.15046e+06	3.29149e+06	3.12115e+06	2.56238e+06	3.29503e+06	4342704	4.0852e+06	3.84287e+06	2.98912e+06	2.71995e+06	3443822	3.43671e+06	2.77122e+06	5.29117e+06	3.36854e+06	4.95021e+06
1232	hexanoylcarnitine	Lipid	Fatty Acid Metabolism(Acyl Carnitine)	32328	LC/MS Pos	100000781	3194	260.186	6920-35-0	6426853		HMDB00705	6589794	11381872	22099466	15752396	12631526	184611840	27407338	11319218	17269646	6.33569e+06	8886757	12854490	42834800	4921722	4652132	131575752	117233656	32289944	11928430	3.72986e+06	5636826	3.84782e+06	9324305	25286692	30793638	18974264	11876164	6569723	10227244	13355161	26909230	19738020	32503716	8806763	15203023	17316208	15886198
1221	hexanoylglycine	Lipid	Fatty Acid Metabolism(Acyl Glycine)	35436	LC/MS Neg	100001527	2900	172.098	24003-67-6	99463		HMDB00701	115684	245821	201431	186555	144474	65996.3	105666		100072	114423	175327	99526.8	59405.6			78221.2	90313.3			177312	97172.6		109168	77376.2	125604	122136		77678.2		85281.9	99668.7	44421.6
2671	hippurate	Xenobiotics	Benzoate Metabolism	15753	LC/MS Neg	100000014	2106.9	178.051	495-69-2	464	C01586	HMDB00714	2.94918e+06	5139650	5.21641e+06	9621635	2.63238e+06	2782204	6655841	6561148	17860308	2216492	1.38032e+06	1138289	1.95822e+06	1339301	2572821	5735640	1.29013e+06	1133877	1.42197e+06	2876364	2734250	3.61494e+06	7.13527e+06	2.30273e+06	2757576	4.39487e+06	4696228	8259120	2292648	586947	667891	1.83028e+06	867190	2638788	5384068	786851	873565
65	histamine	Amino Acid	Histidine Metabolism	1574	LC/MS Pos	354	579	112.087	51-45-6	774	C00388	HMDB00870	67174336	212999968	98099224	272327520	236033232	114876184	333020512	160581712	265338160	26572306	246980624	431251968	199706816	61624728	221820784	200299504	137566608	401893088	35850460	152305904	205115664	154687856	413573984	158285152	486786080	251692848	378660704	358250976	144388288	68850520	134461840	116498968	40356636	632453824	72400152	113748208	32389596
53	histidine	Amino Acid	Histidine Metabolism	59	LC/MS Neg	355	755.9	154.062	5934-29-2	6274	C00135	HMDB00177	140949968	191706112	177209584	128858992	112412616	152135776	148194096	196856112	195492304	649893824	167690176	89722560	92930392	50955028	115149304	101891120	56044332	128690808	96494192	209363904	278588576	254906352	138559360	113096560	185536400	174433056	329169056	233231184	294681760	265481664	84781240	112915000	118983120	110572696	187800368	117538928	144983776
332	homocitrulline	Amino Acid	Urea cycle; Arginine and Proline Metabolism	22138	LC/MS Pos	100000963	821.7	190.119	1190-49-4	65072	C02427	HMDB00679	372675	715368	286082	1.06285e+06	2.09577e+06	2.10693e+06	314118	452135	1.04877e+06	2.12281e+06	1.47338e+06	624097	2.01995e+06	1888391	481520	1.00453e+06	563461	693267	1.00978e+06	679573	1.00978e+06	1.04875e+06	794639	2.51774e+06	2.28392e+06	461316	969931	448908	3.3386e+06	1.36171e+06	825140	2.31284e+06	5047912	216357	1.42279e+06	1.38044e+06	2.0701e+06
2964	homostachydrine*	Xenobiotics	Food Component/Plant	33009	LC/MS Pos	100001550	1211	158.118	1195-94-4	441447	C08283	HMDB33433	480548	887316	1.13875e+06	838560	1232209	323912	1.1027e+06		4817602	3.29003e+06	2287546	1.75493e+06	1.11801e+06			780262	1.24183e+06			1.30531e+06	1307908	2125177	824336	1.16099e+06		1.09439e+06		5634742	5.92228e+06	2.9803e+06	3.34232e+06	1.8192e+06	436163	816201	2.21299e+06	3.21761e+06
1230	hydroxybutyrylcarnitine*	Lipid	Fatty Acid Metabolism(Acyl Carnitine)	43264	LC/MS Pos	100003926	1477	248.149		53481617		HMDB13127	21413506	32244980	51396560	87122432	51679732	524954912	58636180	62581264	38708584	29750542	20209478	19565744	295741440	11537035	20156832	325664032	331394944	125396648	15178746	16884930	30628586	37744568	34295964	77920320	161391664	46833552	111602344	13664901	35149520	27302558	33777568	76969088	30985098	45811124	70835520	71258808	53848200
2751	hydroxycotinine	Xenobiotics	Tobacco Metabolite	38661	LC/MS Pos	100002717	1275	193.097	34834-67-8	10219774		HMDB01390	840976	5.81703e+06	3.13987e+06	2.0393e+06		3.03956e+06						2.09654e+06					2.43901e+06			1545628	3948962	2.79854e+06	1.78582e+06		3079230						2.07158e+06					2.10312e+06
316	hypotaurine	Amino Acid	Methionine, Cysteine, SAM and Taurine Metabolism	590	LC/MS Pos	358	690	110.027	300-84-5	107812	C00519	HMDB00965	1.2324e+06	7.72604e+06	4110345	3.95383e+06	2.63465e+06	3.8709e+06	3.44233e+06	2531878	7339254	5122342	7133971	2.18704e+06	4.8384e+06	1.2582e+06	2.17358e+06	5846736	4.99555e+06	12835406	3305011	8382059	12897310	5045437	11917649	5.45608e+06	4217751	7.77924e+06	8735510	6557873	7.10928e+06	11255063	26565444	6585042	5539167	9543418	6.19857e+06	11203146	4.24281e+06
2430	hypoxanthine	Nucleotide	Purine Metabolism, (Hypo)Xanthine/Inosine containing	3127	LC/MS Neg	171	1291.2	135.031	68-94-0	790	C00262	HMDB00157	265611024	589907264	538638464	613813696	606994048	739173056	399388512	729471616	774430272	1149907712	544914048	285048032	452466528	176085296	332493760	388697088	245783792	594000128	382701600	953287296	1333238912	953730496	940326784	745357824	1136940288	902123008	1326207104	988656384	695361088	777816320	555970240	692110592	1204631936	738003776	1198674688	809864768	690697664
64	imidazole lactate	Amino Acid	Histidine Metabolism	15716	LC/MS Pos	100000263	782.7	157.061	14403-45-3	440129	C05568	HMDB02320	701009	1.20184e+06	319180	807049	3.76766e+06	1.58836e+06	946914		3.18585e+06	1.8559e+06	1.61964e+06	969802	3.20696e+06	1.582e+06	1.09157e+06	2.37973e+06	929501	433060	578905	8893333	3.68488e+06	2.01703e+06	4779440	6956663	2.9812e+06	1.67629e+06	1.50487e+06	9785611	4.42428e+06	1.86355e+06	8466441	5561244	6844977	7277596	2785607	3187240	8.12126e+06
63	imidazole propionate	Amino Acid	Histidine Metabolism	40730	LC/MS Pos	100003434	1020	141.066	1074-59-5	70630		HMDB02271	401280	956816	2.0004e+06	422441	2.78956e+06	2.07691e+06	1.35985e+06	1.49002e+06	2.39856e+06	1954543	2.29322e+06	536790	2.95986e+06	392937	3.13865e+06	3945809	3447619	7.73222e+06	784341	2.73079e+06	1.41416e+06	2.50484e+06	987784	13227715	5.20113e+06	1.5759e+06	3.43299e+06	6165855	2521574	1244658	6.04304e+06	1725848	1.3229e+06	3.55522e+06	1974252	51350128	59665816
198	indoleacetate	Amino Acid	Tryptophan Metabolism	27513	LC/MS Pos	100001034	3766.3	176.071	6505-45-9	802	C00954	HMDB00197	346127	1.23605e+06	10977019	1.58939e+06	2.55916e+06	2.39886e+06	2763191	1.2235e+06	4.87688e+06	875291	1.66655e+06	955961	2.34511e+06	1.4121e+06	1319691	7.69519e+06	1.33845e+06	1.44158e+06	1.07809e+06	841454	759413	5.88076e+06	1.6418e+06	1.88462e+06	3059574	1.60478e+06	927216	2544653	1.41174e+06	1.14508e+06	1526533	1277278	801146	950798	762123	925498	956148
197	indolelactate	Amino Acid	Tryptophan Metabolism	18349	LC/MS Pos	100000463	3514	206.081	832-97-3	92904	C02043	HMDB00671	264344	1.17746e+06	864444	557246	1.43168e+06	726355	921594	640605	1.86338e+06	923542	1.70733e+06	672571	1.32997e+06	316034	604938	862872	803737	437392	601418	750783	803059	405752	936029	925490	1.12309e+06	873271	727712	2.30897e+06	2.98475e+06	960970	1.62713e+06	894574	868158	977483	440828	561484	414312
200	indolepropionate	Amino Acid	Tryptophan Metabolism	32405	LC/MS Pos	100001083	4147.9	190.086	830-96-6	3744		HMDB02302	779035	522968	378243	746226	462029		474933		1.39392e+06				478174		942201	426898		191090		416860			622962	225775										539095
2429	inosine	Nucleotide	Purine Metabolism, (Hypo)Xanthine/Inosine containing	1123	LC/MS Pos	361	1679.3	269.088	58-63-9	6021	C00294	HMDB00195	97156120	131372544	110053376	417431040	461254912	1025726464	291780480	61474036	175377856	200437024	102210424	270529856	816521664	230118992	391766112	766322752	809591680	483511200	184831088	253043728	469339584	240224912	348621216	397584800	218509568	329464416	83124744	176082768	42607696	86170480	359293504	377760064	666511040	448361568	562108608	622221632	379077184
2428	inosine 5'-monophosphate (IMP)	Nucleotide	Purine Metabolism, (Hypo)Xanthine/Inosine containing	2133	LC/MS Polar	362	4267.7	347.04	4691-65-0	8582	C00130	HMDB00175				1265564		1595327						820383	11026736			23960324	4824213	260381								30920.8					302339		388201		48632	81823.2	2352316
1398	inositol 1-phosphate (I1P)	Lipid	Inositol Metabolism	1481	GC/MS	370	2057.8	318.1	573-35-3;106032-59-1	440194	C04006	HMDB00213	365870	523187	448731	359760	292991	187883	247898	426134	523321	552073	411079	613745	289431	221874	264335	337306	233184	515498	131012	1.02778e+06	590022	640821	493088	1.11829e+06	674755	441879	768450	553637	428892	791081	190565	749708	585254	495184	318589	898939	989463
803	Isobar: fructose 1,6-diphosphate, glucose 1,6-diphosphate, myo-inositol 1,4 or 1,3-diphosphate	Carbohydrate	Glycolysis, Gluconeogenesis, and Pyruvate Metabolism	46896	LC/MS Neg	100002180	551	338.989					7093713	17980712	19674398	1.59952e+06	5159862	581705	9131802	17030252	63438132	13694813	7335940	3.61867e+06	8970002	905821	9740460	18065846	8185878	1610036	2.60617e+06	69244168	14786012	11639055	7403857	4487576	6.47841e+06	2.93448e+06	43592220	13391181	11768865	33557788	1.36283e+06	5662185	1.45225e+06	7910229	7.72499e+06	5944684	4.46737e+06
282	isobutyrylcarnitine	Amino Acid	Leucine, Isoleucine and Valine Metabolism	33441	LC/MS Pos	100001055	1955.1	232.154	25518-49-4	168379		HMDB00736	12785919	13205681	22225408	50178988	12704782	26502722	8894721	7.66723e+06	16812804	4.83369e+06	25683322	27394708	66878392	13069487	14298352	109632824	13184873	24198172	10906103	13685695	9580481	3.93648e+06	26426266	7524241	12114789	13427928	13306401	5927175	22039706	64456808	25106524	9638640	107552968	19008270	16043780	8451168	8.01676e+06
983	isocitrate	Energy	TCA Cycle	12110	LC/MS Pos	1206	967.7	193.034	20226-99-7	1198	C00311	HMDB00193					628253			444293							446569	344555				144192	3.55541e+06	536062	3.4991e+06	1707909	686402	1.51378e+06	2.48279e+06	3.16524e+06			547538	2.87022e+06	10640430	1.97213e+06	2201493	413106
266	isoleucine	Amino Acid	Leucine, Isoleucine and Valine Metabolism	1125	LC/MS Pos	376	1599	132.102	73-32-5	6306	C00407	HMDB00172	1491446400	1897464064	2224434432	1093158656	1859423360	1436605312	1187494784	2459163904	2415421952	2214576896	2475943424	727068160	1055636608	342522144	986596160	1125890944	370405984	1503220736	946401920	3503986944	4159021824	3072506624	2021275264	2475702272	2952971264	2478792192	4343379456	4153542912	3750714880	3682792448	1844647936	2113144192	2604192512	2358162432	2947420928	1392853632	2213696000
569	isoleucylglycine	Peptide	Dipeptide	40008	LC/MS Pos	100003169	1740	189.123	868-28-0	342532			166109	1.52672e+06	1.05565e+06	6.75699e+06	6192782	7495123	1.70767e+06	419556	4.89431e+06	3499990	647632	1.10688e+06	2.34469e+06	508053	2.27386e+06	1.42261e+06	980157	12200341	889037	8443045	80499640	25943612	7330170	27949980	17984644	7.23247e+06	11871966	5145018	3.79383e+06	3.14346e+06	5.08987e+06	21360330	20911548	14992355	5515200	3.79956e+06	4860912
243	isovalerate	Amino Acid	Leucine, Isoleucine and Valine Metabolism	44656	LC/MS Neg	100000708	1564	101.061	503-74-2	10430	C08262	HMDB00718				1.26295e+06	1.01694e+06		1077837	317991				1.5817e+06			930000							7.15419e+06						2.3941e+06			24123700						247910
245	isovalerylcarnitine	Amino Acid	Leucine, Isoleucine and Valine Metabolism	34407	LC/MS Pos	100001393	2504.9	246.17	31023-24-2	6426851		HMDB00688	7.27884e+06	7.39331e+06	2.9658e+06	22688558	21493084	10224501	7274950	5.2249e+06	10890681	6824742	18708658	32195538	17765298	9341961	9299587	20253402	19838058	60241176	15919209	14284529	6531682	1.23436e+06	6166484	11676047	9599753	14498815	10169757	9822125	137288624	73127024	21766746	4.15886e+06	8568852	5.46133e+06	13737753	7.66366e+06	9551859
204	kynurenate	Amino Acid	Tryptophan Metabolism	1417	LC/MS Neg	98	2224	188.035	492-27-3	3845	C01717	HMDB00715		136188	271295	245249	367637	193463	350930	68927	191404	82246.9	273840	150007	392089	303182	285751	348134	210357	153939	283367	218742	109012	289643	287697	1.29905e+06	388424	1.08918e+06	518887	233661	291400	508837	1.30888e+06	112965	348518	484940	1.06899e+06	1213936	73829.2
203	kynurenine	Amino Acid	Tryptophan Metabolism	15140	LC/MS Pos	100000265	1902.1	209.092	2922-83-0	161166	C00328	HMDB00684	5.47088e+06	15561657	30113738	9592670	64751904	22555146	20956452	27051712	13907021	11830727	14459086	10645902	28009900	25706762	22925744	8646332	9321226	11910482	85284064	254908544	74155544	131691000	104804312	97640112	161210752	336195040	240078976	115197456	127545200	248495040	69980464	71976592	101223624	83559128	436048000	168746272	30563626
813	lactate	Carbohydrate	Glycolysis, Gluconeogenesis, and Pyruvate Metabolism	527	LC/MS Neg	482	681.6	89.0244	79-33-4	612	C00186	HMDB00190	2583977472	4066792192	4594750976	3663156736	4843670528	6096754176	3192396288	2794707968	5563123200	4640098816	3251417344	2248451328	5361636864	2602926336	2304263680	5734587904	4141123072	5296136192	3541150208	4885378560	6868754432	5470672896	4195515392	5903707136	4854713856	4261047040	4644420096	3566325760	4700227584	3365112576	3851189504	5907745280	7450648576	4344814592	4884502016	5472155136	6091773952
1238	laurylcarnitine	Lipid	Fatty Acid Metabolism(Acyl Carnitine)	34534	LC/MS Pos	100001392	5070	344.28	25518-54-1	10427569		HMDB02250		697787	403508	1.54724e+06	1.37791e+06	1.64289e+06	1.97821e+06	733585	2.70422e+06		1.31692e+06	3.09413e+06	3893964	490189	746212	3.6271e+06	2.60974e+06	1.80704e+06	1281770	1.05438e+06	2299379	286522	3.1732e+06	1363684	992915	2579790	810842	5186245	1476041	1.54683e+06	34770844	1.11815e+06	1.88944e+06	3.47157e+06	1.67004e+06	1.90646e+06	818585
237	leucine	Amino Acid	Leucine, Isoleucine and Valine Metabolism	60	LC/MS Pos	397	1680.2	132.102	61-90-5	6106	C00123	HMDB00687	3682415104	4762693120	5528952320	2862441216	4418538496	3318275584	2778240512	5509998080	5390802944	5856876032	5522134528	1923238656	2568423936	878318016	2638426368	2383583488	951137920	3539982336	2139193344	7937463296	10584415232	6790767104	4625980416	5373832192	6010232832	5561428992	9598873600	8647552000	7684621824	7807794688	3896293376	4755301376	5580238336	4848193536	5877843456	3031393792	4263424000
748	leucylglutamine*	Peptide	Dipeptide	48189	LC/MS Pos	100003183	1578	260.161		4305457					206571	342696	587594	467228			271148	276032			908607	695065	2.81836e+06	398536		1334652	428650	679280	4286672	1.29911e+06	1205205	3.91392e+06	2.04191e+06	1.85265e+06	1.01301e+06	1.1113e+06	290568	359059	1226273	5498495	11366218	2.98352e+06	1.78986e+06	1.70264e+06	1.05929e+06
587	leucylglycine	Peptide	Dipeptide	40045	LC/MS Pos	100003185	1805	189.123	686-50-0	79070			283938	764860	938124	1.47467e+06	2.49269e+06	4.8925e+06	642391	460271	1.52035e+06	1.63608e+06	370356	636363	4260367	1.26142e+06	3.61368e+06	2.44536e+06	1.17152e+06	5863442	1088906	2.21408e+06	17443558	4.44629e+06	2460853	20123052	4848721	2.92238e+06	2.8013e+06	2.42901e+06	1.25303e+06	1.2285e+06	3.1753e+06	16557966	28976896	5995878	2.40074e+06	2.88359e+06	3342072
3277	lidocaine	Xenobiotics	Drug	35661	LC/MS Pos	100001538	2850	235.18	137-58-6	3676	D00358	HMDB14426	398546	1619620	36554440	1.05698e+06	300322	17070032	834808	6.87383e+06	91996560	2.25882e+06	7.1583e+06	617566	683729		12189947	53376416	19027242	271097632	1157785	466437	543399	4573890	194445		15180640	630166	5846028	38800408	1.0585e+06	7.66625e+06		129266		8510442	43832296	17474926	234221120
1056	linoleate (18:2n6)	Lipid	Polyunsaturated Fatty Acid (n3 and n6)	1105	LC/MS Neg	180	5535	279.233	60-33-3	5280450	C01595	HMDB00673	3953260800	3756964608	5472193024	2590604032	3359631104	3269783040	3607157760	4880493568	4510183936	6907230208	4808113152	2550777856	1894947712	1345275264	3028645120	2075373312	1033249024	4777424896	2588074496	7072300544	6697462784	5089667072	2658911744	3710321664	3751086336	2489997056	5552650240	2541613568	5282826240	7065155072	2091449344	2938841600	3508177664	2079358976	4099308288	1428308352	2387079168
1058	linolenate [alpha or gamma; (18:3n3 or 6)]	Lipid	Polyunsaturated Fatty Acid (n3 and n6)	34035	LC/MS Neg	100001337	5450	277.217		5280934	C06426	HMDB03073	130285152	117757640	135433344	85080808	55417540	61259256	84659592	82622800	104351744	162616896	106322280	71853472	36114508	27856492	62579348	27037176	21968492	79865576	97074504	454110112	400536352	122860072	83586624	71738472	103692704	54747576	104701208	255129024	224312368	193772592	50119052	53843340	79996744	59675016	49752096	27600180	31345728
1243	linoleoylcarnitine*	Lipid	Fatty Acid Metabolism(Acyl Carnitine)	46223	LC/MS Pos	100003151	5190	424.342	36816-10-1	6450015		HMDB06469	739948	2.04466e+06		1.28103e+06	3.51236e+06	203825	913274	1.15734e+06	14252628		4531660	5888764	5226573	457076	1017975	9359768	716992	5618340	1.00197e+06	2.49361e+06	1.45214e+06	983655	1.23193e+06	1.3995e+06	559034	1.23705e+06	1.57354e+06	966637	1.25815e+06	3.75738e+06	2.95572e+06	890302	3.47769e+06	543702	1.63654e+06	1876451
73	lysine	Amino Acid	Lysine Metabolism	1301	LC/MS Pos	407	613.8	147.113	56-87-1	5962	C00047	HMDB00182	246096320	557544960	466287488	264821088	295383264	190592480	259138320	583683968	582592832	488595904	581553152	190542128	145772064	52930656	151694816	126860072	72632224	251619952	117885656	715758528	714888448	469200576	302506016	256156960	364414816	329926816	1160808448	973798464	776109120	753391936	172206064	204871824	299675424	280853184	212270608	119849944	239260336
606	lysylleucine	Peptide	Dipeptide	40020	LC/MS Pos	100003196	1561	260.197	7369-79-1	4682588						774060	767954	1.08594e+06	44018.4		762012	156795	130634		497892				142669	1.55651e+06		1.46259e+06	5.83747e+06	2.55124e+06	764983	1.17376e+06	876542	1091854	957282	642055		211402	2.47946e+06	1.42137e+06	10201718	780449	280226	64255.4	746853
989	malate	Energy	TCA Cycle	1303	LC/MS Polar	409	3343.1	133.014	6915-15-7	525	C00149	HMDB00156	1398324480	1801158784	1569423616	2105038464	1178067328	1780658432	847015296	1457400448	1940711808	2930608640	984480576	923169280	1278766592	1459102720	1036655360	304060576	702746304	2135447296	638081408	1405080448	112321848	1247078656	1048601344	989260352	1201095552	1380458112	1110402304	1506492672	948202560	1293892480	811787456	908450240	198179584	945479872	595462400	1148186240	1243118848
1198	malonylcarnitine	Lipid	Fatty Acid Synthesis	37059	LC/MS Pos	100001526	965	248.113	853728-01-5	22833583		HMDB02095			1.07394e+06	2.30145e+06	681068	9560596	306934	316606	2.24574e+06	681068	842880		6.21154e+06		117507	4858441	2.82278e+06	2053314				795928			1.78828e+06	915815	271489	1.57693e+06	387054	603336		336328		530027	1.26965e+06	1.03804e+06	275305
856	maltohexaose	Carbohydrate	Glycogen Metabolism	35170	LC/MS Neg	100001448	1215.2	989.32	34620-77-4	439606	C01936	HMDB12253	1.10732e+06	834116	375042	722667	307155	1.55458e+06	139315	746373	833365		1.50443e+06	241894	62429.7	101152	180379		550935	1.36364e+06	89165.6	1.35456e+06	293027	147179	73984.8							197170		1.23814e+06
858	maltopentaose	Carbohydrate	Glycogen Metabolism	35163	LC/MS Neg	100001447	1080.9	827.267	34620-76-3	13489094	C06218	HMDB12254	1.12583e+06	534704		2.1853e+06	938045	5576241	257828	183475	2.54014e+06	376877	209458	1203182	2.00384e+06		112254	86323.3	593248	3.26604e+06	492051	2.07535e+06	3.1083e+06	1.02466e+06		1.0048e+06		79891.2	368567			416093		1.17721e+06	963780			49794.3	36220.5
864	maltose	Carbohydrate	Glycogen Metabolism	15586	LC/MS Polar	913	3329.4	387.114	6363-53-7	10991489	C00208	HMDB00163	12290895	16107185	4.03173e+06	17106112	4861562	36390812	1.85259e+06	21265232	11447990	1204070	26495502	7.87982e+06	6366803	6202926	5228667	8308733	13282362	24803302	1.60287e+06	19929914	10578224	2.72765e+06	3006393	5.9283e+06	2677901	162236	2075634	144912	672043	3362341	1359116	16534317	3509223	1.15685e+06	772676	1.69514e+06	2108176
859	maltotetraose	Carbohydrate	Glycogen Metabolism	15910	LC/MS Pos	100000275	960	667.229	34612-38-9	446495	C02052	HMDB01296	475543	660493			860481	4.17306e+06			621304	482988		656951	449868					2.91117e+06	112401	2.54755e+06	535804			696140								1.11335e+06
861	maltotriose	Carbohydrate	Glycogen Metabolism	44688	LC/MS Neg	100000276	812	503.162	1109-28-0	439586	C01835	HMDB01262	113982840	95193040	13244385	136155040	46049996	183449936	12833803	86358824	48783108	1.27615e+06	126663240	55076216	34183716	44718652	21010158	36393360	64600816	130043216	6174809	129792552	47758048	12854323	13234808	46879816	9837322	1.64289e+06	5526521	614788	1.51899e+06	13225231	7093698	98118224	13995379	6901024	3.28239e+06	10844037	11636718
910	mannitol	Carbohydrate	Fructose, Mannose and Galactose Metabolism	15335	GC/MS	100000277	1839	319.1	69-65-8	6251	C00392	HMDB00765	57231.9	91736.5	107364	303547	187985	864674		3649351	428139	176069	198836	164189	797546	2.77693e+06	126644	713602	67828504	610823	3.22853e+06		113124		189792	308858	173329	170048	1.35879e+06		195072	251944	251944	249261	1.92943e+06	262475	205275	44761216	501519
906	mannose	Carbohydrate	Fructose, Mannose and Galactose Metabolism	48153	LC/MS Polar	803	2200	225.062	3458-28-4	18950	C00159	HMDB00169	3013192	3304526	2.63946e+06	1.56819e+06	683495	12075271	906090	3.81007e+06	593070	4.18215e+06	1.46425e+06	1.56725e+06	2.93512e+06	1.12975e+06	2.04278e+06	1.4591e+06	200984	322370	595268	1.99358e+06	8.33421e+06	2.05765e+06	482886	1.79861e+06	1.60901e+06	491384	5.71103e+06	1.62784e+06	2.93395e+06	5112412	294573	1588597	4310033	626944	154912
907	mannose-6-phosphate	Carbohydrate	Fructose, Mannose and Galactose Metabolism	1470	GC/MS	294	2035.9	387.2	70442-25-0;104872-94-8	439198	C00275	HMDB01078	261912	368715	583195	130839	424119	2.76586e+06	137492	664978	229219	1.75409e+06	491873	82191.6	1.47671e+06	151747	283478	700621	303188	117908	221129	984484	2143962	880171	182308	1.85811e+06	546386	698335	1.5313e+06	605513	701180	2272144	98212.7	1.30648e+06	3.09824e+06	631621	218568	199196	222913
1020	margarate (17:0)	Lipid	Long Chain Fatty Acid	1121	LC/MS Neg	891	5731	269.249	506-12-7	10465		HMDB02259	241179696	195034256	354159936	156974464	158859248	125486216	136361344	220421600	227119744	385770080	199176672	149591456	98792072	102819000	167574096	232572128	91531784	186823584	165397552	389321952	413135968	347430464	196017792	206792608	323119712	262683728	266312528	194166256	626462016	225966080	174743232	188376656	303769440	227373520	196896864	107831320	119513336
290	methionine	Amino Acid	Methionine, Cysteine, SAM and Taurine Metabolism	1302	LC/MS Pos	415	1250	150.058	63-68-3	6137	C00073	HMDB00696	427452608	695287744	678116416	454450368	609302720	442574752	395259520	863158336	851052032	623567360	837777024	274488096	254779888	130158656	288240640	171745344	90438016	488468096	289929696	1387708800	1785630208	1077414144	649718784	630476928	853989632	889906368	1610387840	1659181312	1381198080	1312684032	364149856	501629888	548307456	616657856	526212672	219924144	343834496
294	methionine sulfone	Amino Acid	Methionine, Cysteine, SAM and Taurine Metabolism	44878	LC/MS Polar	100004635	1880	180.034	820-10-0	69961				153062		112397	189442	249820		47588.8		189746			196532	131774		119287		68508	74541.5		293378	224034	128391		199726		146750		338005	151341	67689.1	175302	383540		216867	172157	313526
295	methionine sulfoxide	Amino Acid	Methionine, Cysteine, SAM and Taurine Metabolism	18374	LC/MS Pos	100000039	741.1	166.053	3226-65-1	158980	C02989	HMDB02005	7301815	6934185	8.13222e+06	4387564	5281676	3.10456e+06	3543870	7.71631e+06	7.90317e+06	6.23872e+06	7810435	3.6846e+06	3.50059e+06	3.73969e+06	2967487	835060	940012	5005981	6443596	11788981	12062697	8758465	5.77493e+06	5034755	7174329	10555989	17671462	14359240	16931712	11577836	5.89811e+06	4.36021e+06	7.48887e+06	4.13799e+06	4.65914e+06	2.01794e+06	4471817
3070	methyl glucopyranoside (alpha + beta)	Xenobiotics	Food Component/Plant	46144	LC/MS Neg	100005864	1070	193.072					387881	476915	526072	1.03266e+06	2108893	3.19392e+06	895358	746107	1.39999e+06	601086	681621	257368	2.12766e+06	699866	734011	1740907	1.64738e+06	13581061	748420	5056391	5223021	2.39403e+06	2130163	7.65884e+06	1.90763e+06	731363	778508	190238	421397	515084	1453733	13914641	18259126	1.41477e+06	1.78138e+06	2.28597e+06	5.48038e+06
1218	methylmalonate (MMA)	Lipid	Fatty Acid Metabolism (also BCAA Metabolism)	1496	LC/MS Polar	418	3078.4	117.019	516-05-2	487	C02170	HMDB00202	5.63047e+06	6.17436e+06	10361565	3.6533e+06	14944576	68289464	9427549	4.83384e+06	7629711	41031276	5005670	2.82967e+06	28352664	3.96202e+06	19650676	55601012	4.38484e+06	13810143	3.20537e+06	4151401	8839636	4.05891e+06	3.12689e+06	15571710	17515184	22243756	4.74574e+06	5.47048e+06	5.64397e+06	7.4174e+06	2023971	18198874	16165140	3.64513e+06	6.84427e+06	7335984	21422802
2564	methylphosphate	Nucleotide	Purine and Pyrimidine Metabolism	37070	LC/MS Neg	100001805	605	110.985	7023-27-0	13130		HMDB61711	48532252	61843372	72029008	24853190	72110536	33667512	65644084	66962168	62790476	60461140	37774636	30110998	56447064	30361132	84498880	57325644	46060460	68999864	63844020	92359248	93585984	143758752	79985480	150794208	87991752	79676648	91021728	74178664	97315200	95824184	97438744	92850760	273310656	97455280	134358928	70523072	67413096
3530	MOPS	Xenobiotics	Chemical	47137	LC/MS Neg	100005863	1532	208.065	1132-61-2	70807;2723950			2.03854e+06	640026	105469848	3040248	2.61165e+06	428016	434753	145055		208895	38247136	479252	94035.1	378551		1037317	204555	150768	110511	856502	55404	257933	111546	2.81285e+06	227605	1.24438e+06	198346			80802.6	297224	40175.3	469998	187724	392086	176361
1390	myo-inositol	Lipid	Inositol Metabolism	1124	LC/MS Polar	363	3506.3	225.062	87-89-8	892	C00137	HMDB00211	88960248	50539744	62263664	54597348	60567220	53378832	33837408	66038636	65926232	128915312	42821780	59423788	91086984	90509432	73327968	52661648	27541246	30993758	34265316	50362584	74870192	54617440	43812968	72681432	98235976	102713752	120240288	73557192	88987760	78175576	45989484	119673984	95030800	75118488	73198744	65120604	27277842
1014	myristate (14:0)	Lipid	Long Chain Fatty Acid	1365	LC/MS Neg	519	5440	227.202	544-63-8	11005	C06424	HMDB00806	490847936	408233536	446484448	479459968	318434624	367101664	492024320	435332736	453200416	593748032	507679648	470143552	228798944	245985216	345654496	277371328	240329344	374170720	325641536	1679607296	1416749056	660216384	491926656	513325472	583263488	429369696	528462944	859291776	863105536	672040320	576119168	346922944	605298496	425153280	428212800	339751040	338831520
1015	myristoleate (14:1n5)	Lipid	Long Chain Fatty Acid	32418	LC/MS Neg	100001198	5346.9	225.186	544-64-9	5281119	C08322	HMDB02000	67164456	48336852	58685956	79714704	44475244	51919692	74319512	58558952	52628468	70659584	90049288	76914528	33963780	31261000	40231308	32344392	31548238	55362948	83487656	349285120	323148992	86920056	141772016	65657740	65688184	53093880	75781576	249140288	107196504	108723336	166947072	43941196	69610880	65028796	35375340	30870968	39591976
1246	myristoleoylcarnitine*	Lipid	Fatty Acid Metabolism(Acyl Carnitine)	48182	LC/MS Pos	100006051	5120	370.295	889848-55-9					759148	317704	5.39684e+06	2.0274e+06	1.63767e+06	1.3089e+06	1.32474e+06	1.3913e+06	205935	1.65799e+06	2.54677e+06	7.67993e+06	475548	843834	7.66785e+06	1.53199e+06	5.07865e+06	1.2259e+06	459267	583376		2.0912e+06	2.32143e+06	1.36694e+06	2.3806e+06	826570	1.90902e+06	1.7416e+06	1.99123e+06	20520154	1.22422e+06	1.97263e+06	3.91876e+06	2.61597e+06	1.54548e+06	985466
1239	myristoylcarnitine	Lipid	Fatty Acid Metabolism(Acyl Carnitine)	33952	LC/MS Pos	100001270	5142.1	372.311	18822-89-4	53477791		HMDB05066	435642	1.67492e+06	444811	1.96585e+06	1.80383e+06	830755	1.25514e+06	1.74838e+06	2.66451e+06		1.96336e+06	6472967	1.65627e+06	946438	1.33381e+06	5.88497e+06	1.61287e+06	3.87289e+06	1.07913e+06	3.24887e+06	3.35046e+06	1164351	4787130	3.2596e+06	1.99046e+06	2.99912e+06	2.26193e+06	6.33037e+06	2.68616e+06	2.22474e+06	17130112	1.63249e+06	7132004	2.72899e+06	2.5295e+06	3232377	1285088
2582	N'-Methylnicotinamide	Cofactors and Vitamins	Nicotinate and Nicotinamide Metabolism	31465	LC/MS Pos	100001113	1595	137.071	114-33-0	64950		HMDB03152	4474515	6644245	8710263	2.13601e+06	401480	2754333	298004	341621	1242818	1242818	2698825	2223586		394767	128908		261963		655350	14721874	26859908	8987394	11179880	407010	13768538	1.29935e+06	653985	3019619	1.03012e+06	11317376	16098004	99250.4	1.28774e+06	409557	397271	3.93407e+06	79144.7
367	N(1)-acetylspermine	Amino Acid	Polyamine Metabolism	32360	LC/MS Pos	1200	550	245.234	77928-70-2	916	C02567	HMDB01186				2404585	2.67888e+06	1.45386e+06	678266		2.90885e+06	467728	1.20111e+06	330281	1.0969e+06	474582	141605		573903	1.29291e+06	4055023	14052085	6310849	11814840	14855221	4.94369e+06	3960572	16636753	1.1107e+06	13513193	1.76611e+06	1.4383e+06	25359344	162491	14325989	23454668	5979452	3.11604e+06	5477872
76	N-6-trimethyllysine	Amino Acid	Lysine Metabolism	1498	LC/MS Pos	189	690	189.16	23284-33-5	440120	C03793	HMDB01325	8508879	18962778	14889111	9653094	12128909	8046555	7880611	30220750	24073856	7983802	23995210	9399553	9596688	3.49019e+06	5867838	9066126	5089497	8281321	6.46216e+06	24743898	27948802	14750940	16965686	9703714	13746417	14361631	50059156	60688964	29495096	30394628	11424973	9466789	18996242	13900094	12512373	7.63045e+06	16469539
42	N-acetyl-aspartyl-glutamate (NAAG)	Amino Acid	Glutamate Metabolism	35665	LC/MS Pos	100001612	1575.4	305.098	3106-85-2	5255	C12270	HMDB01067	1.04343e+06	1.48513e+06	1.06533e+06	2.82032e+06	1169394	3976118	2631291	1.52811e+06	872516	3756494	3.35081e+06	10654223	2309296	311661	2.19392e+06	1.16931e+06	1.66086e+06	932200	469323	4648158	1.22498e+06	647748	856361	576149	7820741	1.04882e+06	4.24432e+06	4.17329e+06	3.40842e+06	1.65805e+06	169690	6.16062e+06	2.07417e+06	1.13721e+06	1.30853e+06	625892
2535	N-acetyl-beta-alanine	Nucleotide	Pyrimidine Metabolism, Uracil containing	37432	LC/MS Pos	100002102	1471	132.066	3025-95-4	76406	C01073		1235354	6.52546e+06	4.21532e+06	3.38028e+06	19575798	2.28322e+06	7.61064e+06	7.11056e+06	6636126	1627571	7593116	4876638	7722928	4984473	3.51311e+06	4254717	1858032	4.15229e+06	6456780	9101293	10812267	6.63855e+06	9142924	4.47369e+06	4699995	8.17707e+06	9393212	18729642	3684878	10492704	8.351e+06	3145445	11727125	6244232	14172809	3036583	8528089
954	N-acetyl-glucosamine 1-phosphate	Carbohydrate	Aminosugar Metabolism	15741	LC/MS Polar	1212	4052	300.049	31281-59-1	440364	C04256	HMDB01367		275301	246465	386809	1.16061e+06	440335	290197	308276	468607	817801	191695	477349	295750	512777	338706	367749	73015.6	599396	386565	1371355	2.29238e+06	1.41857e+06	1.84199e+06	2.79821e+06	606008	970610	1.03154e+06	430844	362350	340145	903520	1.80789e+06	2.03415e+06	1.64594e+06	1.28753e+06	777002	1900299
26	N-acetylalanine	Amino Acid	Alanine and Aspartate Metabolism	1585	LC/MS Neg	1110	861.2	130.051	97-69-8	88064	C02847	HMDB00766	18816414	26956120	30377914	25167468	37948596	13533713	16723235	39343556	42959472	22399728	53022384	15974481	12417973	8923170	10530640	10804963	6.44198e+06	17024756	14044748	66969676	75926384	56150004	43922380	29342986	35579804	45301320	82511112	69767888	75136392	67758320	25148778	22035686	34930460	34132792	32618978	14687515	26505824
32	N-acetylaspartate (NAA)	Amino Acid	Alanine and Aspartate Metabolism	22185	LC/MS Pos	100000787	1222.4	176.055	997-55-7;997-55-7	65065	C01042	HMDB00812	1.02259e+06	2.31099e+06	5250820	8711441	13569443	9310832	12394838	1603101	7081655	35187600	3.10159e+06	18311010	6903196	3.6512e+06	11252553	6.29854e+06	7477923	10131358	5.79831e+06	46941224	30165878	11735690	52171372	18580286	30438928	19969550	44334528	37002632	43637736	19583618	12273514	44539056	36092892	38491356	24810830	10361072	7.70003e+06
410	N-acetylcarnosine	Peptide	Dipeptide Derivative	43488	LC/MS Neg	100004046	1235	267.11	56353-15-2	9903482		HMDB12881	266017	278275	213099	1.98095e+06	364287	4833937	466951		269993	58825.6	313704	171353	2.23019e+06		305459	3.43739e+06	2.84719e+06	620228	34429.8	145446			97019.9	103246	593159	198300	66648.4		80042.9	158165				234763	507947	144326	48737.7
308	N-acetylcysteine	Amino Acid	Methionine, Cysteine, SAM and Taurine Metabolism	1586	LC/MS Pos	1107	1792	164.038	616-91-1	12035	C06809	HMDB01890	242078	560356	167331	207737	734922	254881							914423		167923	2.15692e+06	158877	581765	145548	659181	3.36526e+06	1.27647e+06	575298	1.01241e+06	1.65007e+06	520456	1.53783e+06	658568	365240	182609	993916	1.42333e+06	887530	834704	1.85711e+06	1.23724e+06	1.12362e+06
956	N-acetylgalactosamine	Carbohydrate	Aminosugar Metabolism	2766	GC/MS	1106	1887.4	245.1	14215-68-0	35717	C01074	HMDB00212	25292.6	39874.4			63795.2		33319.8	57020.5		276776	42686.3	49017.1		18084.3	38494.6				57403.2	61494.8	92114.5	327331	40499.5	317547	61728.2	116418		155303	270096	175164		187637	174056	44307.6	123952	61547.8	85397.4
952	N-acetylglucosamine	Carbohydrate	Aminosugar Metabolism	15095	GC/MS	100000281	1903.3	245	7512-17-6	24139	C00140	HMDB00215	21267.2	120298			119843		47383.2	191731		422772	56813.7	84203.5		40679.8	53463.5				196643	217965	255497	489727		866281		172744	151090	204693	241131	413556		568868	1.75537e+06	106784	200423	118005	196077
953	N-acetylglucosamine 6-phosphate	Carbohydrate	Aminosugar Metabolism	15107	LC/MS Polar	1213	4114	300.049	102029-88-9	439219	C00357	HMDB02817	245001	2.10386e+06	1464798	2.14665e+06	4.13201e+06	1.33367e+06	1.7237e+06	1.9438e+06	2.93925e+06	7.17737e+06	1.41683e+06	2.26594e+06	1.55689e+06	1260889	1.66275e+06	698251	364002	2.08428e+06	2153241	7.77473e+06	9600532	8770291	8.08355e+06	9891563	4385893	4.81216e+06	9728971	3.87911e+06	3934099	3.57427e+06	2542478	7.20786e+06	6237555	6.80018e+06	7044754	4.24028e+06	2.49861e+06
40	N-acetylglutamate	Amino Acid	Glutamate Metabolism	15720	LC/MS Pos	100000282	1492	190.071	5817-08-03	70914	C00624	HMDB01138		492060	382775	464562	1.62774e+06	703519	641029	798577	783429	751885	628458	732165	882848	143577	492416	1203518	570025	964383	714808	2.40384e+06	2.00454e+06	1.52014e+06	1.92861e+06	1.77187e+06	2.62034e+06	2360628	2.80608e+06	2858024	2.83779e+06	3.03439e+06	2.13116e+06	1.92861e+06	1.26658e+06	3.05533e+06	21015010	2.95372e+06	2.60267e+06
41	N-acetylglutamine	Amino Acid	Glutamate Metabolism	33943	LC/MS Pos	100001253	1193	189.087	2490-97-3	182230	C02716	HMDB06029		188880	144366	280010	670780	370577	269954	255843	563389	197060	216960	223567	382400			950798	229354	401035		361981	580214	546220	398424	312779	740977	586273	606625	903669	271967	431244	565338	320184	724627	432506	1.51379e+06	423549	1.15104e+06
2	N-acetylglycine	Amino Acid	Glycine, Serine and Threonine Metabolism	27710	LC/MS Neg	100001006	731	116.035	543-24-8	10972		HMDB00532	1.45395e+06	2.95864e+06	3.29889e+06	2735836	3.4628e+06	4272890	2.23191e+06	2.3982e+06	1.37083e+06	961264	3.6103e+06	3.01721e+06	2.65584e+06	1080870	1583573	2334083	3712248	2.79801e+06	1.37161e+06	2.31671e+06	2.98951e+06	3590652	2.56085e+06	3.337e+06	5623953	3.01491e+06	2.58209e+06	1.89738e+06	1.18562e+06	3.18528e+06	2.61044e+06	2.81584e+06	1.12875e+06	1.63006e+06	2.91607e+06	4.08166e+06	3.19681e+06
54	N-acetylhistidine	Amino Acid	Histidine Metabolism	33946	LC/MS Neg	100001293	900	196.073	39145-52-3	75619	C02997	HMDB32055		71965.1	137910	147483	472043	338876	158316	42973.9	235259		325117	77094.3	595372		164445	291883	318980	89493.7	185329	338876	276214	459177	1.42046e+06	235569	387817	719515	416735	659522	187309	432931	2.14901e+06	323168	418471	654845	645068	321170	376947
238	N-acetylleucine	Amino Acid	Leucine, Isoleucine and Valine Metabolism	1587	LC/MS Neg	1082	2400	172.098	1188-21-2	70912	C02710	HMDB11756	714547	762940	729788	350827	670219	276266	280333	608181	451614	851931	1.12161e+06		335966		456532	447689	174735	389068	285131	819193	942910	908623	449908	638290	775873	716081	761713	1.14568e+06	601817	871821	808679	656455	825655	512824	715314	960107	515638
957	N-acetylmannosamine	Carbohydrate	Aminosugar Metabolism	15060	GC/MS	1217	1915.9	245.1	7772-94-3	439281	C00140	HMDB01129	102448	153203	306534		243910		59389	193821	83489.7	407231	199419	55131.8		146794	272717				101852	287494	399095	666925	96354.4	796067	371682	770298	840682	536588	462857	584901	60162.3	735480	297064	341111	1.211e+06	218166	217540
291	N-acetylmethionine	Amino Acid	Methionine, Cysteine, SAM and Taurine Metabolism	1589	LC/MS Neg	1083	1787	190.054	65-82-7	448580	C02712	HMDB11745	9404713	50888432	23001538	53646764	63440672	44780704	23440448	46275888	64683092	31433442	36909260	35975092	18788736	10396961	17403202	24895170	6555298	61021876	24790102	156086320	359835392	159648752	102770080	72808536	137567136	96429640	164384416	98084272	117421264	61169784	45579484	60587840	95452120	57164444	96325960	29233094	57049016
296	N-acetylmethionine sulfoxide	Amino Acid	Methionine, Cysteine, SAM and Taurine Metabolism	45428	LC/MS Neg	100005463	942	206.049		193368				170917	196589	253842	295718	254043	61891.1	71138.3	265301		132991	155514	154226					195287	179714	640826	956835	808983	164139	178436	461410	655974	834772	378115	260949	468647	282871	283027	309279	300395	396796	155422
960	N-acetylneuraminate	Carbohydrate	Aminosugar Metabolism	32377	LC/MS Pos	1162	796.9	310.113	131-48-6	439197	C00270	HMDB00230	18764556	30745512	35695444	8829476	31495310	8924922	21315918	17009442	51629676	48073676	43296492	38287640	18541486	26801032	25385506	7.07139e+06	4.96704e+06	46810944	13950360	14209729	18926622	20977518	17049746	19757496	23019812	24796352	17414360	14235078	18566720	19203246	12872330	16632766	23591246	13363736	29122870	9976771	32766486
99	N-acetylphenylalanine	Amino Acid	Phenylalanine and Tyrosine Metabolism	33950	LC/MS Neg	100001256	2597	206.082	2018-61-3	74839	C03519	HMDB00512	1.04399e+06	1.34631e+06	1.09337e+06	703640	658866	547086	356684	1.96952e+06	618257	1.6599e+06	1.58111e+06	381306	353047	250660	582880	330591	295887	594571	237180	870946	1.08717e+06	700400	659612	473309	788398	850340	1.85816e+06	1641416	1373336	1.50063e+06	862277	421316	954700	398567	727839	870338	637343
369	N-acetylputrescine	Amino Acid	Polyamine Metabolism	37496	LC/MS Pos	192	840	131.118	18233-70-0	122356	C02714	HMDB02064	97121	2921045	2.21741e+06	4402051	2.66753e+06	6665192	2276104	1.31749e+06	1.64614e+06	879521	2.52797e+06	3244344	1.63411e+06	3387718	4390308	4.19781e+06	1.60208e+06	3725572	4799622	69745616	25306126	22792136	10139900	6.54718e+06	10849020	6484465	7.05883e+06	11715603	6.1761e+06	12447138	105099648	4588424	25406000	9530973	13153701	7621972	20216160
10	N-acetylserine	Amino Acid	Glycine, Serine and Threonine Metabolism	37076	LC/MS Pos	100001851	1021	148.06	97-14-3	65249		HMDB02931	16839408	19094786	22196536	5764368	17637516	5.35898e+06	7086481	26064502	21521814	19580662	24100084	5.28935e+06	7.85857e+06	2.7412e+06	5561807	13707864	6296295	8702078	6.73722e+06	28865866	23301748	21430710	15024573	18426428	18720070	18129310	27204834	52783772	24223960	33448486	13494413	13508743	22091494	21228198	26882068	10723908	20789374
318	N-acetyltaurine	Amino Acid	Methionine, Cysteine, SAM and Taurine Metabolism	48187	LC/MS Neg	100005466	800	166.018		159864			1.74074e+06	5045293	5449690	2.90901e+06	7463044	3.67856e+06	4.93893e+06	4.30557e+06	6.19283e+06	2.81388e+06	4.59351e+06	3.56858e+06	5495997	1.28073e+06	3.46374e+06	6.21975e+06	5570017	6.23363e+06	4.37886e+06	9497019	7822089	6898934	6899870	4.9163e+06	7108683	8622642	6164491	11034048	4538004	5252928	9597699	4.02113e+06	2.85848e+06	11149878	7684876	6369904	6.11034e+06
15	N-acetylthreonine	Amino Acid	Glycine, Serine and Threonine Metabolism	33939	LC/MS Neg	100001274	821.6	160.062	17093-74-2	152204	C01118		12649553	18707140	25813768	10468267	18913944	12439248	10074107	25006178	20303546	19932018	16692436	11037696	13601671	7.18299e+06	7704577	20000736	9402918	16486821	9993545	27024684	29617808	27645786	24298278	27129880	29146148	28567628	72127328	58548224	58654308	42898920	15955171	28937878	39998336	19369240	58753180	22322606	46025080
194	N-acetyltryptophan	Amino Acid	Tryptophan Metabolism	33959	LC/MS Neg	100001254	2630	245.093	1218-34-4	700653	C03137	HMDB13713	137515	112488	142471					76506.9			99199		33695.6	5.85165e+06	70084.6				4.03436e+06						77803.9	51768.5			85909.8			114288	2590381			88381.1
112	N-acetyltyrosine	Amino Acid	Phenylalanine and Tyrosine Metabolism	32390	LC/MS Neg	100001104	1680	222.077	537-55-3	68310		HMDB00866	291983	209681	210092	87475.5	81590.1	75642.5	77661.4	323674	152728	292644	310595	52209.6							76471	245346	156388	122668	85186.8	87498.6	125405	135974	302560	501008	197715	472642	155078	88115.1	151228	112238	159103	654770	111086
279	N-acetylvaline	Amino Acid	Leucine, Isoleucine and Valine Metabolism	1591	LC/MS Neg	1084	1704	158.082	96-81-1	66789		HMDB11757	544334	614229	756243	516205	1.13879e+06	453614	396533	851154	951937	529595	1.0116e+06	357946	614835	257139	686492	588139	367499	515354	532392	1.38967e+06	1516672	1.2413e+06	925946	1.01824e+06	1.08372e+06	1.04824e+06	1.50507e+06	2.04582e+06	1.22203e+06	1.59505e+06	841895	1.10218e+06	1.41549e+06	964182	1.51879e+06	1.03748e+06	1.16346e+06
340	N-delta-acetylornithine	Amino Acid	Urea cycle; Arginine and Proline Metabolism	43249	LC/MS Pos	100004523	887	175.108		9920500			749106	2.02571e+06	4068793	3124262	5835265	1.66326e+06	946596	198009	1.23807e+06	2.29381e+06	1.83057e+06	2.87493e+06	5270916	1.75044e+06	1.4842e+06	3.15274e+06	3996186	789299	1.83973e+06	3.12251e+06	3.72639e+06	13786566	4.16025e+06	9687691	2.00336e+06	1.74823e+06	541819	1.29574e+06	4.76854e+06	1.16546e+06	4.32199e+06	8.15586e+06	8770553	3.12602e+06	5.15302e+06	13441071	5273286
3298	N-ethylglycinexylidide	Xenobiotics	Drug	33080	LC/MS Pos	100001539	2630	207.149	7728-40-7	24415	C16561	HMDB60656			9266031			8922074		353895	38239708	168500	3.15456e+06				8.13049e+06	7698924	27169572	33105162	397627			8.3194e+06			12926776	938255	1.00329e+06	60337108		19726892				7968303	14163342	45469608	29619092
292	N-formylmethionine	Amino Acid	Methionine, Cysteine, SAM and Taurine Metabolism	2829	LC/MS Neg	194	1543.8	176.039	4289-98-9	439750	C03145	HMDB01015	1.14826e+06	2.02194e+06	1.98505e+06	2986156	4.67688e+06	2.9367e+06	2.54988e+06	1.81986e+06	3.01251e+06	1.92478e+06	1841008	1.96439e+06	5024582	1.27014e+06	1.94812e+06	4.05891e+06	3657837	3.46888e+06	1.39343e+06	5077509	8835298	4366079	5.31764e+06	3.31805e+06	4.02087e+06	4654086	3.03575e+06	2.94722e+06	2174470	2.57051e+06	5421630	4518861	6224816	5016703	6.46002e+06	3.35949e+06	3338774
3529	N-methylpipecolate	Xenobiotics	Chemical	47101	LC/MS Pos	100005383	1129	144.102	41447-17-0	11862129;11286529			1.4684e+06	1.84323e+06	1.02386e+06	4.89652e+06	13931436	7198280	1.10679e+06	2.80701e+06	6149050	9338713	6.80618e+06	2.28932e+06	14023581	14475130	2.49143e+06	5481453	2.88032e+06	4812876	10478699	1.32548e+06	1.74174e+06	935175	5177941	15881471	6.7492e+06	1425473	2.85039e+06	5.56122e+06	11440428	6.03743e+06	2.87237e+06	14009945	18530804	5602888	5728823	4.22736e+06	5.85906e+06
344	N-methylproline	Amino Acid	Urea cycle; Arginine and Proline Metabolism	37431	LC/MS Pos	100001956	831	130.086	475-11-6	557			5248822	3.94646e+06	2.17921e+06	2478245	3.19401e+06	1.58173e+06	2.97513e+06	1.32333e+06	2.08529e+06	1.68982e+06	2.20896e+06	3.32713e+06	2.7701e+06	6114549	8.17674e+06	15602617	2.03247e+06	957081	5431362	5282647	3.13135e+06	1.57862e+06	1.47017e+06	3.39331e+06	2013287	3233357	2052446	1.19444e+06	3.26751e+06	1.92859e+06	2778300	2.33785e+06	7.59215e+06	11447275	15495525	2380384	1.12761e+06
1385	N-oleoyltaurine	Lipid	Endocannabinoid	39732	LC/MS Neg	100003119	5610	388.253	52514-04-2	6437033			280707		433522	756636	1318708	2.89296e+06	360704	953270	1.37583e+06	1.69766e+06	587099	464632	2.3563e+06		220680	1321758	1100678	5.15518e+06	1.18731e+06	3.96552e+06	2.04758e+06		611543	4.01879e+06	1.51542e+06	635977	1634067		1.95836e+06	1.65212e+06	3945876	2.48851e+06		2.79002e+06	1.7181e+06		429126
1224	N-palmitoyl glycine	Lipid	Fatty Acid Metabolism(Acyl Glycine)	42092	LC/MS Neg	100003686	5580	312.254	2441-41-0	151008			477756	733622	1.00254e+06	539729	856128		594517	1.14726e+06	791086	1.25406e+06	743944	658781	456876	313891	714092	485493	252242	320082	648320	963479		682113	439782	384861	1.43514e+06	1.04087e+06	842165	1.04921e+06	636654	564631	829645	426162		828146	1.10221e+06	232817	200943
1651	N-palmitoyl-sphingosine	Lipid	Sphingolipid Metabolism	48278	LC/MS Polar	1518	703	582.51	24696-26-2	5283564		HMDB04949	411545	151551	334258	92017.8	60897.5		113173	363632	74964.3	99943.6	82047.2	167369		419035	272163		74320.6		547635	246201	321299	115594	96811	62732.1	129293	166862	265159	258426	126938	345202	255840	71664.8	714488	92889.4	157267	193442	156053
1387	N-palmitoyltaurine	Lipid	Endocannabinoid	39835	LC/MS Neg	100003239	5560	362.237	83982-06-3				734746	690626	1.70319e+06	748464	1.1981e+06	3.27136e+06		1.21722e+06	1.12094e+06	2.21285e+06	522776	413143	1.79472e+06		706185	1344821	1.78567e+06	3.33926e+06	898194	2.31709e+06		378548	584139	706168	2.17742e+06	1.4852e+06	1.62063e+06	1.32936e+06	1.05884e+06		3.04433e+06	1.01277e+06		1705753	1.65418e+06	422997	325747
1386	N-stearoyltaurine	Lipid	Endocannabinoid	39730	LC/MS Neg	100003240	5782	390.268	63155-80-6	168274				584620	1498418	798804	2.0196e+06	2.26312e+06	1.22287e+06	762520	1.13364e+06	975211	730589	444306	2515213	226738	977230	916126	2.30027e+06	3080611	2.27096e+06	3.53473e+06	1.56884e+06	1.48172e+06	1182592	2.81712e+06	1.72717e+06	3.35914e+06	1.64804e+06	1.43128e+06	1.44977e+06	922452	5.52301e+06	2785112		4.47016e+06	2.46526e+06	902285	726480
2588	N1-Methyl-2-pyridone-5-carboxamide	Cofactors and Vitamins	Nicotinate and Nicotinamide Metabolism	40469	LC/MS Neg	100001468	1668	151.051	701-44-0	69698	C05842	HMDB04193	3.8278e+06	6.1943e+06	2.32558e+06	5922607	8595904	4.11948e+06	8873575	3.20659e+06	3.93282e+06	4585048	4136421	4463044	7.76845e+06	3880306	6022878	3.98805e+06	3508143	6.17756e+06	6.75832e+06	3.73899e+06	4.98529e+06	1.62065e+06	7240518	3733044	5.22034e+06	9239779	2287661	2.31027e+06	7.09374e+06	4531372	3.33447e+06	3.61022e+06	1.18143e+06	6.72308e+06	3.4598e+06	3612712	3366905
2457	N1-methyladenosine	Nucleotide	Purine Metabolism, Adenine containing	15650	LC/MS Pos	1242	1399	282.12	15763-06-1	27476	C02494	HMDB03331	5.48245e+06	6257964	9214322	4851180	14720486	7663822	6.27644e+06	5924396	18763742	8896566	7297688	4.29006e+06	6841683	3.53124e+06	7.20461e+06	9223584	6841873	11037079	5.13713e+06	12257275	8445641	13474663	10272063	10128160	26392452	13612757	7.18918e+06	36957516	15238207	7.85493e+06	9002288	8464394	8010939	9788949	14776175	6.06307e+06	9212306
2491	N1-methylguanosine	Nucleotide	Purine Metabolism, Guanine containing	31609	LC/MS Pos	100001122	1869	298.115	2140-65-0	96373		HMDB01563	1.55798e+06	3.45438e+06	3.76344e+06	1274946	6227555	1.51516e+06	2.18275e+06	3.5758e+06	10175051	5045783	4355232	1.17586e+06	1.53898e+06	1596912	1.20481e+06	2.97779e+06	1.80646e+06	4.18938e+06	4197628	9496699	6.19686e+06	6696439	4.24877e+06	4869576	13433575	6.67905e+06	3.86614e+06	14494083	7.2069e+06	5.06349e+06	2.40925e+06	3.78546e+06	5.14259e+06	3311535	6304656	1919809	3.00412e+06
2493	N2,N2-dimethylguanosine	Nucleotide	Purine Metabolism, Guanine containing	35137	LC/MS Pos	100001412	2168	312.13	2140-67-2	92919		HMDB04824	111458	345543	381683	198291	2.1358e+06	391975	493127	542501	1.63082e+06	713608	559328	230916	698491	708419	328745	1.19433e+06	452501	1.01207e+06	1446292	1.25337e+06	672013	1.76304e+06	1.12789e+06	1.20753e+06	4347490	1.69481e+06	709364	6279174	1.86335e+06	418754	1.22989e+06	839832	973489	1.35941e+06	2.51623e+06	646395	986419
74	N2-acetyllysine	Amino Acid	Lysine Metabolism	36751	LC/MS Pos	100001721	836	189.123	1946-82-3	92907	C12989	HMDB00446		225099	135297		249777			202664	660677		678415	279038	166696	58969.8		393875		314126	257104	912604	661705	456964	634134	1.01481e+06	650698	467208	901530	1.08546e+06	715558	790150		781041	1.64152e+06	465199	1.33201e+06	227125	1690648
2492	N2-methylguanosine	Nucleotide	Purine Metabolism, Guanine containing	35133	LC/MS Neg	100001467	1988	296.1	2140-77-4	3035422		HMDB05862	167352	239521	392011	202446	1.3433e+06	332791	434035	342346	907982	474196	331578	264483	471407	475130	286659	813821	536808	1.12307e+06	1.17272e+06	1.18944e+06	867866	1527473	1.23616e+06	1.04578e+06	4119228	1.51877e+06	850054	4.02311e+06	1.64776e+06	512687	519057	717955	1.27312e+06	907830	1776689	502223	915313
2547	N4-acetylcytidine	Nucleotide	Pyrimidine Metabolism, Cytidine containing	35130	LC/MS Pos	100001413	2040	286.103	3768-18-1	107461		HMDB05923	111334	355308	617377	183991	1.01726e+06	545782	564273	563959	1173137	556070	496403	282272	833172	280574	485661	913677	373541	934517	644490	543319	531572	1.16984e+06	466303	1.12237e+06	1632390	1.06849e+06	441461	2.1776e+06	928437	476477	728902	737122	472589	917027	1.58452e+06	444545	808060
75	N6-acetyllysine	Amino Acid	Lysine Metabolism	36752	LC/MS Pos	100001734	1140	189.123	692-04-6	92832	C02727	HMDB00206	4.08798e+06	27658312	15143804	4.81454e+06	6468385	3059083	2947766	35623516	29086320	6929639	20232918	3.81719e+06	2952423	1382287	2.0473e+06	3.16546e+06	1226470	3.96594e+06	3.3926e+06	31590140	28737466	12817488	6.75369e+06	4752834	8726509	9086981	68106816	57757952	26085554	22455746	10518276	4.31457e+06	8290160	6.8693e+06	7633304	2931809	6651253
2467	N6-carbamoylthreonyladenosine	Nucleotide	Purine Metabolism, Adenine containing	35157	LC/MS Pos	100001415	2673	413.142	24719-82-2	161466		HMDB41623	101923		407718		265004			241197	626419	847654	297837					196252		217758		669514	240549	384658		240995	816221		332186	610474		265523	165318	171267	482040		568883
2458	N6-methyladenosine	Nucleotide	Purine Metabolism, Adenine containing	37114	LC/MS Pos	213	1988	282.12	1867-73-8	102175		HMDB04044									134724									196591			1.86847e+06					351748		249802	125690		574290			231061	433430	87347
2476	N6-succinyladenosine	Nucleotide	Purine Metabolism, Adenine containing	48130	LC/MS Pos	100001664	2222	384.115	4542-23-8			HMDB00912	1.20546e+06	1.91576e+06	3.32481e+06	585171	1.92066e+06	793087	828977	1.37742e+06	7.45492e+06	10639884	2.22306e+06	886374	914121	837556	2.68183e+06	5027014	885030	1.53919e+06	859441	8054389	6152054	7.24365e+06	2857507	4.09043e+06	2.00061e+06	2.28605e+06	3.01251e+06	7.00921e+06	3.02573e+06	2.36217e+06	2.07392e+06	3.23837e+06	3.85092e+06	2.68693e+06	6.73405e+06	2.82918e+06	9689909
3295	naproxen	Xenobiotics	Drug	12122	LC/MS Neg	1384	4155	229.087	22204-53-1	156391	C01517	HMDB01923		41100648	592568	281695		1.33697e+06									2.69075e+06					2.76347e+06	10653557	1.3423e+06			1.64854e+06									1.64854e+06
2569	nicotinamide	Cofactors and Vitamins	Nicotinate and Nicotinamide Metabolism	594	LC/MS Pos	432	1271.1	123.055	98-92-0	936	C00153	HMDB01406	511667872	546777280	670190144	565321536	671414784	1049315264	493554624	512955104	515646080	1224160000	486639680	336269056	721406848	365445504	612077312	435820480	331479456	689013248	413316640	756241792	1049367552	821203200	822436032	947315648	726426688	971750144	878148288	1019520256	813833728	824049152	630083456	857539200	857689280	726926976	966628544	725926400	370297088
2573	nicotinamide adenine dinucleotide (NAD+)	Cofactors and Vitamins	Nicotinate and Nicotinamide Metabolism	5278	LC/MS Neg	1310	1434	662.102	53-84-9	5893	C00003	HMDB00902	383083	134483	251215	961937	242611	2.06799e+06	237915	64391	174929	213281	305701	1.42653e+06	30441556	985108	1.14224e+06	22627716	42720116	2.9368e+06	361867	220114	45488.1	1.22646e+06	531010	2567133	128612	1.12557e+06	61126.9	356687	193834	98151.6	1.96254e+06	2.37161e+06	162518	931247	4228994	11616623	14356003
2574	nicotinamide adenine dinucleotide reduced (NADH)	Cofactors and Vitamins	Nicotinate and Nicotinamide Metabolism	31475	LC/MS Neg	428	1540	664.117	58-68-4;606-68-8	439153	C00004	HMDB01487		89751	120047	46519.2	51036.2	37708.2	231837		140009			967576	4623514	341172	1.06657e+06	8919236	4213972	419754	154536	100062			173313	251671	89508.2		50656	430673	212678		1.57305e+06	1.1028e+06		1.47161e+06	911483	2200816	3.36909e+06
2566	nicotinate	Cofactors and Vitamins	Nicotinate and Nicotinamide Metabolism	1504	LC/MS Neg	567	1180	122.025	59-67-6	938	C00253	HMDB01488	7.30989e+06	8206860	7884447	5207057	6.08976e+06	8705314	6069583	5.43664e+06	8290338	6.66029e+06	6.49426e+06	6037305	6.82835e+06	5299771	5953535	7934808	7.88051e+06	5724694	6.71662e+06	9856446	20300176	9029591	6.00084e+06	15933990	11473194	7.11746e+06	8880165	19086010	6370451	6.82074e+06	10431589	8907087	9309066	6.65788e+06	6.70028e+06	25066150	10657407
1030	nonadecanoate (19:0)	Lipid	Long Chain Fatty Acid	1356	LC/MS Neg	892	6068	297.28	646-30-0	12591	C16535	HMDB00772	18776354	17599072	25291422	13327526	14563739	9735276	12399812	18677782	15365665	27914940	16484872	13981235	8930732	9292587	11970820	24568218	10025358	15909202	25887966	37102528	35171672	31464400	17855360	16059437	22509102	27014278	22009124	17493838	56217144	22889248	34340528	20489392	20560804	19515870	21689320	13509325	13630036
387	norophthalmate*	Amino Acid	Glutathione Metabolism	39251	LC/MS Pos	100002287	975	276.119	1116-21-8	5489007		HMDB05766				825440	191570										190471					1.65396e+06	19071414	2.24681e+06	1239100	416665	1.99476e+06	244407					204669	653158		870691	377762		256042
2702	O-methylcatechol sulfate	Xenobiotics	Benzoate Metabolism	46111	LC/MS Neg	100004208	2344	203.002		22473				153876	55237.6	273221	586760	157025	175081	66173.4	211367		83027.7	165929	572507	97276.7	272753	274675	299197	154506	50168.1				148057	205370	109610	51129.3					56554.7	227416		59628.5		121638
3426	O-sulfo-L-tyrosine	Xenobiotics	Chemical	45413	LC/MS Neg	100005384	990	260.023		514186			1.15067e+06	1.52546e+06	1.26304e+06	910358	1.88806e+06	824066	860194	1548229	1.48108e+06	4.04822e+06	1.71777e+06	706423	1.45878e+06	988724	740339	583744	486615	1.23516e+06	1.11424e+06	1.8581e+06	2.47773e+06	1.87061e+06	1.27085e+06	2415455	2.315e+06	1.61346e+06	2.64806e+06	1.83585e+06	2.93597e+06	2.56697e+06	1.48059e+06	2822986	2.313e+06	1.48299e+06	1.71141e+06	1.16094e+06	829150
1233	octanoylcarnitine	Lipid	Fatty Acid Metabolism(Acyl Carnitine)	33936	LC/MS Pos	100001247	4090	288.217	3671-77-0	123701	C02838	HMDB00791	1.59828e+06	3.2147e+06	2720693	4692473	4.00002e+06	15608682	12838332	2.59919e+06	3.64077e+06	603834	3.83833e+06	6977458	11219447	2.19139e+06	1597872	24571916	19061446	6460004	5.16784e+06		356767	500350	1.83512e+06	2820345	2.88302e+06	4.38531e+06	1.18247e+06	1.51118e+06	2.32611e+06	3.05924e+06	23449320	2.76429e+06	1.6147e+06	3.55969e+06	2.75767e+06	2.81025e+06	4.61212e+06
1024	oleate (18:1n9)	Lipid	Long Chain Fatty Acid	1359	GC/MS	442	1984.4	339.2	112-80-1	445639	C00712	HMDB00207	2.36135e+06	2.59957e+06	3.31278e+06	2.68451e+06	2.79221e+06	2.9212e+06	2.08419e+06	4.05118e+06	2.57089e+06	6192972	3.28275e+06	2.20375e+06	1.95516e+06	1.23286e+06	2218071	1.85106e+06	1.14702e+06	3.36501e+06	2982090	8941199	10667436	5748527	3.02131e+06	5.00324e+06	4.47927e+06	3.48748e+06	5357088	4.72399e+06	6.75363e+06	7461529	2812375	3810404	3.93886e+06	3.66245e+06	3.72345e+06	1.97589e+06	2.30957e+06
1375	oleic ethanolamide	Lipid	Endocannabinoid	38102	LC/MS Neg	1137	6900	324.291	11-58-0;111-58-0	5283454		HMDB02088	5.23173e+06	7821831	6558998	5887256	8897419	4757207	3700306	29678122	6.93631e+06	12455906	6868569	8768097	1.39244e+06	8970028	9312732	22084430	5.71755e+06	24739952	10403538	91201472	25783218	24813042	36980172	49663456	113907064	11704462	100207000	33245446	32887390	33548232	15388704	64923492	22571702	21960768	71946248	37932500	104668576
1582	oleoyl-linoleoyl-glycerophosphocholine (1)	Lipid	Phosphatidylcholine (PC)	48270	LC/MS Polar	100006165	777	828.576					7048968	5.74555e+06	6.15834e+06	3.003e+06	4884341	3872995	4.75815e+06	4.79487e+06	5344151	5548186	4517047	6010804	3941217	4452631	5.59176e+06	4.81508e+06	3.87512e+06	5.49198e+06	4993854	5.24394e+06	4.35195e+06	4.21508e+06	4184684	4324966	3.65996e+06	3.60188e+06	4.62672e+06	3.81236e+06	3.75057e+06	5569840	2.76071e+06	3.88546e+06	4.86537e+06	3.11408e+06	6.24696e+06	3.99457e+06	5.87461e+06
1583	oleoyl-linoleoyl-glycerophosphocholine (2)	Lipid	Phosphatidylcholine (PC)	48390	LC/MS Polar	100006166	860	828.576					2.6214e+06	2703911	3.09418e+06	1.51706e+06	2.11869e+06	1.66911e+06	1.79472e+06	1833129	2154053	2.12909e+06	1892041	2.45997e+06	1.58724e+06	1.47381e+06	2251530	1.91065e+06	1.59685e+06	2.23657e+06	2.61687e+06	2664069	1.97037e+06	851979	1.75412e+06	1.7185e+06	1.66291e+06	1.46149e+06	2.12579e+06	1833129	1.46611e+06	2.12693e+06	1250601	1.67224e+06	2.46583e+06	1.59883e+06	3.00675e+06	894599	2.16447e+06
1590	oleoyl-linoleoyl-glycerophosphoinositol (1)	Lipid	Phosphatidylinositol (PI)	48303	LC/MS Polar	100006140	902	859.534					427377	357253	285735	131137	172747		105062	276602	124292	390151	113320	359573	73951.6	188981	212656	126074		177097	143577	192180	146656	195366	142231	148816	123231	223023	229235	261340	125736	232471	198565	184631	404965	88457.2	307064	249253	270654
1244	oleoylcarnitine	Lipid	Fatty Acid Metabolism(Acyl Carnitine)	35160	LC/MS Pos	100001501	5215	426.358	38677-66-6	6441392;53477789		HMDB05065	788089	1.64292e+06	871534	2371552	3.3985e+06	668524	1.30501e+06	2.93093e+06	5.87567e+06		3.75115e+06	7.52766e+06	6478679	1406089	1.09235e+06	10283979	1.47967e+06	7.99325e+06	1.54254e+06	6.74655e+06	4.30754e+06	2166188	3.98517e+06	4733798	3.39665e+06	2.85342e+06	4230643	4631018	4.07934e+06	6.17392e+06	14961797	2.71148e+06	9982384	2.71133e+06	3.29759e+06	3347122	1.06848e+06
386	ophthalmate	Amino Acid	Glutathione Metabolism	34592	LC/MS Pos	100001311	1462	290.135	495-27-2	7018721		HMDB05765		776120	628838	6.49863e+06	7.3058e+06	8106643	14796864		2.13554e+06			9571389	11177772	9283016	63091088	18921312	20556596	10053306	2.08326e+06	3.86006e+06	27070698	6.30114e+06	12419775	43676932	7222874	11434206	289161				2.96495e+06	23793492	6.29532e+06	13312153	11860393	16360749	22828162
327	ornithine	Amino Acid	Urea cycle; Arginine and Proline Metabolism	1493	LC/MS Pos	444	614	133.097	3184-13-2	6262	C00077	HMDB03374	9488096	7268972	8752473	10805157	9401369	9316481	14346113	13397804	19908596	12801767	12745473	7982541	11290407	1.8909e+06	10635597	9153742	5677695	14241332	6740869	47615012	8.26399e+06	21788186	17485964	19619892	10446481	14552366	10649536	16082377	15998555	10019216	21333436	12858060	8547673	10676062	8606719	20794332	26419876
2505	orotate	Nucleotide	Pyrimidine Metabolism, Orotate containing	1505	LC/MS Polar	445	1638.1	155.01	50887-69-9	967	C00295	HMDB00226	1.70837e+06	2.98575e+06	8795748	1.80955e+06	2437736	2.05515e+06	2.93628e+06	7116901	5.48439e+06	4760953	6115294	1.34478e+06	2.29188e+06	1.3013e+06	3.29441e+06	1.83116e+06	1.09571e+06	3.37589e+06	3270107	16485633	31286492	9428306	5089828	35340824	11600375	6.35918e+06	11420643	36800760	34629748	8.00407e+06	12643124	10249041	23216082	16443904	12814874	18933050	6839840
2507	orotidine	Nucleotide	Pyrimidine Metabolism, Orotate containing	35172	LC/MS Polar	100001416	2250	287.052	314-50-1	92751	C01103	HMDB00788		375943	231739	231572	1.37065e+06	211874	270127	423285	645286	436794	402157	583872	455978	255361	220687	778457	170903	712268	485245	898284	1.24476e+06	500400	396259	712268	739312	582622	1015062	1.77825e+06	593246	781352	366591	736116	1.531e+06	577463	1.70848e+06	701452	1055686
2606	oxalate (ethanedioate)	Cofactors and Vitamins	Ascorbate and Aldarate Metabolism	20694	LC/MS Neg	100000841	603	88.988	144-62-7	971	C00209	HMDB02329	14975946	10727443	9187060	25091320	8262969	1.39046e+06	9922297	17187744	7.37428e+06	4235942	5.81615e+06	14411796	4.95753e+06	6.12228e+06	10605914	4.71569e+06	3.2759e+06	5.25233e+06	6523709	9012825	4.71861e+06	3.44782e+06	11901158	4.17122e+06	3200381	5837767	10122849	18904090	7.90668e+06	5.77127e+06	5512174	3275897	5.88022e+06	6.85223e+06	4437774	2.9598e+06	4.6526e+06
128	p-cresol sulfate	Amino Acid	Phenylalanine and Tyrosine Metabolism	36103	LC/MS Neg	100001315	2890	187.007	3233-57-7	4615423	C01468	HMDB11635	29270164	41086780	40964896	52846200	52416836	26528670	141320448	51620772	25032418	23792866	20345612	3.04135e+06	42595088	5.02096e+06	33221638	12642946	814632	33167002	971715	25069594	14824355	17488280	42053360	25551966	25094318	65275908	22962238	6.6637e+06	35975868	8219774	270912	22832562	3.09574e+06	21715338	7.72237e+06	275127	18629856
1017	palmitate (16:0)	Lipid	Long Chain Fatty Acid	1336	LC/MS Neg	424	5618	255.233	57-10-3	985	C00249	HMDB00220	6957248000	5098567168	8837294080	5245026816	6099045376	4586873344	5102868992	6994693120	6184842240	10043814912	6365570048	5004752896	3443595008	3528976896	5622121472	3795344640	3078929152	6577609728	5283544576	8830342144	9356270592	7185362944	5767925248	6912582144	9331522560	6981116928	8856445952	9233471488	9609630720	7347823104	6384855040	6049875968	7017232384	6713772544	6904538624	4401876480	4164619520
1018	palmitoleate (16:1n7)	Lipid	Long Chain Fatty Acid	33447	LC/MS Neg	452	5475	253.217	373-49-9	445638	C08362	HMDB03229	945842880	821945472	1083443584	797073024	603425024	791194240	560036352	705066112	1004954944	1163327360	1395335296	768149120	336827392	319037248	485578368	462707520	331562880	936602240	392941408	4090789632	3874092032	1407681792	950483584	1304342144	1103111680	625974912	1320259712	2678085120	2251578368	2420540672	1021140416	829697280	925218112	697352448	903095616	465550240	758123072
1378	palmitoyl ethanolamide	Lipid	Endocannabinoid	38165	LC/MS Neg	1489	6760	298.275	544-31-0	4671	C16512	HMDB02100	5.9136e+06	8607750	7050683	7.22686e+06	8571462	6440453	6473638	16149011	4.98246e+06	12136762	6.59642e+06	10762681	2.97942e+06	6816251	9627880	19985844	6.94997e+06	17444824	9137065	46398816	15861567	19546710	30219158	41074528	70981536	16435920	47468344	27914158	28946094	20301990	11915016	66795316	13648612	15125309	42489692	100925600	80152600
1637	palmitoyl sphingomyelin (d18:1/16:0)	Lipid	Sphingolipid Metabolism	37506	LC/MS Polar	100002107	870	747.566	6254-89-3	9939941			10917382	12547587	9632710	11432918	11420986	5.93271e+06	9015063	9195456	8518998	5.70055e+06	8.06224e+06	10886241	7454385	10647829	8.34644e+06	8.08473e+06	6.54652e+06	9579166	10824049	12160736	13494790	8.08502e+06	12057066	10524601	10116066	9498303	10254748	11381088	9596080	10452725	10136840	11625184	16060055	9226153	10043240	13427524	8156183
1241	palmitoylcarnitine	Lipid	Fatty Acid Metabolism(Acyl Carnitine)	44681	LC/MS Pos	100000776	5204	400.342	6865-14-1	461	C02990	HMDB00222	2.0033e+06	4413454	1.81491e+06	3.72739e+06	6018928	1.6016e+06	2.72362e+06	6175593	6.49402e+06	1.04262e+06	6052272	13773723	3.71955e+06	3.92562e+06	3509619	14835167	3.01127e+06	12725126	4341995	13760519	10656987	5763168	11309834	10441433	7368284	8142430	11267320	20245164	7986546	9033825	24106366	5870684	20622766	7560876	6.67873e+06	14134342	3.49931e+06
3310	pantoprazole	Xenobiotics	Drug	38609	LC/MS Neg	100002808	4398	382.068	102625-70-7	4679	C11806	HMDB05017														7.85563e+06					10775523														1.96742e+06
2594	pantothenate	Cofactors and Vitamins	Pantothenate and CoA Metabolism	1508	LC/MS Pos	1024	2212.4	220.118	137-08-6	6613	C00864	HMDB00210	17230546	27667896	44780452	26131372	26067472	73990824	20141276	19067550	35523592	96974512	27442948	5.48037e+06	62566484	8956917	13367215	49647988	32949516	23926280	10946893	42619700	44472832	37668132	15945314	31299124	49067200	34494620	40859132	53580052	39036032	47908124	11080521	27213708	19385088	30242380	47314108	16430569	11702549
2735	paraxanthine	Xenobiotics	Xanthine Metabolism	18254	LC/MS Pos	100000453	2443.3	181.072	611-59-6	4687	C13747	HMDB01860
1016	pentadecanoate (15:0)	Lipid	Long Chain Fatty Acid	1361	LC/MS Neg	980	5521	241.217	1002-84-2;10002-84-2	13849	C16537	HMDB00826	176157232	144570272	147566736	137841328	116729040	181270592	107848936	113802712	130946832	242384400	144223968	167216272	116121456	69362448	123166896	148457792	135841792	107883912	97781240	231662384	117476856	145013232	108240224	122696176	130698384	151853600	93036912	130449920	273528352	119638968	125031352	113467592	212934256	109712320	138885408	106879680	116763776
126	phenol sulfate	Amino Acid	Phenylalanine and Tyrosine Metabolism	32553	LC/MS Neg	100001510	2156	172.991	937-34-8	74426	C02180	HMDB60015	3.59519e+06	50582692	15082814	21017056	31787356	8927927	21452342	24428862	10987421	3.54504e+06	19350240	15639993	31870480	4357614	10086046	6.93326e+06	28471992	14705271	3.51657e+06	4595236	17146964	5.96486e+06	13555230	13957297	21258030	12454729	10720518	7.50167e+06	4.19115e+06	8377762	41491356	13429069	1.40853e+06	5.23737e+06	3.42686e+06	25590728	3.07728e+06
110	phenylacetylglutamine	Amino Acid	Phenylalanine and Tyrosine Metabolism	35126	LC/MS Pos	100001417	2875	265.118	28047-15-6	92258	C04148	HMDB06344	2.0302e+06	3.14196e+06	3.3975e+06	5.18383e+06	1.01292e+06	816837	12104642	3.07405e+06	3988513	1.38418e+06	925159		766388	2419402	3.02905e+06	626608	144396	1.43434e+06	1.56715e+06	1.30824e+06	1.30824e+06	1.84819e+06	3.98884e+06	719460	711464	8495604	1.27279e+06	2.02597e+06	1.45972e+06	433526		611382	797730	2.52415e+06	419616	86991.4	1.06146e+06
98	phenylalanine	Amino Acid	Phenylalanine and Tyrosine Metabolism	64	LC/MS Pos	460	2050	166.086	63-91-2	6140	C00079	HMDB00159	2002523904	2618481408	3060669696	1557592064	2388228864	1595761792	1713000576	3137961984	2818116864	6168265728	2999822080	1239935360	1285512064	702126784	1578711808	925550976	503200928	1994660736	1252763264	4407673856	5714614272	3740977920	2453523456	2649852416	3216413952	3195333888	5354542592	4924214784	4386456064	4284941824	1859661696	2161510656	2981971712	2354800384	2639110912	1489999616	2071444224
635	phenylalanylalanine	Peptide	Dipeptide	41374	LC/MS Pos	100003589	2120	237.123	3918-87-4	6993123;5488196						332963	1.1454e+06	1.37393e+06			225494	132196			411412		86298.4			1.16501e+06		534362	8960834	1.72283e+06	586299	3942845	1.49947e+06	979200	465433	339378	170029		1.09814e+06	3.22843e+06	9674504	1.913e+06	298091	513194	910675
639	phenylalanylglycine	Peptide	Dipeptide	41370	LC/MS Pos	100003588	2155	223.108	721-90-4	98207			647490	1.93082e+06	1.94047e+06	4369637	6.31522e+06	7659572	1.05558e+06		3737109	7740858	676086	1.5906e+06	3.33483e+06	221478	1.64515e+06	955347	833080	8565014	1.04507e+06	13207578	95484248	34665048	2.78382e+06	33197620	16457749	6.93659e+06	4.28812e+06	2.86229e+06	1.25066e+06	581592	2180576	17543188	24945228	8185468	2.71593e+06	2.72974e+06	4.30791e+06
103	phenyllactate (PLA)	Amino Acid	Phenylalanine and Tyrosine Metabolism	22130	LC/MS Neg	100000774	2208	165.056	828-01-3	3848	C05607	HMDB00779	792166	5464426	4235867	1869902	3.48389e+06	3.18651e+06	2.35078e+06	3.21996e+06	5.3615e+06	4534531	5.54765e+06	2.34347e+06	3.53228e+06	1.65018e+06	1.50597e+06	2.10632e+06	1171841	2.07363e+06	3.11469e+06	20853308	7750092	6740264	4.50865e+06	13235688	6.32804e+06	9068812	17453600	148125056	123743496	10711788	10367571	6972289	4.89497e+06	3.14819e+06	3.91007e+06	4768276	6.75207e+06
1002	phosphate	Energy	Oxidative Phosphorylation	11438	GC/MS	461	1307.7	298.9	7664-38-2	1061	C00009	HMDB01429	102430544	173884176	226249456	249366256	262400176	386438944	152542960	143669376	275776128	331985472	251832416	140806048	350996768	101073104	160129680	306284160	273491136	216590848	143092784	353545728	346410848	357078560	281097504	326272928	284255296	404496288	279834368	467927712	251469520	305016224	221154352	263662192	434808128	360591040	325080192	402260640	328035232
811	phosphoenolpyruvate (PEP)	Carbohydrate	Glycolysis, Gluconeogenesis, and Pyruvate Metabolism	597	LC/MS Neg	463	587.3	166.975	10526-80-4	1005	C00074	HMDB00263	55455012	96872856	57019160	50675748	12654139	36428124	23326234	83659576	57627772	33606044	59800492	28324332	49064316	9875692	5290593	34880796	16001877	28129650	6138997	34288580	9778270	47865568	7006051	19001716	27147058	29166268	23436224	54720800	89064192	11745769	14115415	4.36072e+06	1.5495e+06	8764773	10201270	4.07135e+06	4744882
1424	phosphoethanolamine	Lipid	Phospholipid Metabolism	1600	LC/MS Neg	1026	638	140.012	1071-23-4	1015	C00346	HMDB00224	51076928	63426392	82435120	44518208	63826364	22177122	59423992	77769752	60990300	45311900	68153632	66541284	31245584	55727952	78649568	77541128	40184024	62916372	38115600	119805704	133780440	71857400	157925936	70595104	88985528	110096832	157151936	148193856	74844736	106204680	122178752	91845736	128901336	125262656	115204200	68035608	52269680
2596	phosphopantetheine	Cofactors and Vitamins	Pantothenate and CoA Metabolism	15504	LC/MS Neg	100000328	1596.9	357.089	NA	987	C01134	HMDB01416				362543	2.09594e+06							663325	2.61309e+06	919670	815761	1425654	1.41225e+06	593243					711852	700774		738745					1365470	567412	367037	1301779	957995	663194
90	pipecolate	Amino Acid	Lysine Metabolism	1444	LC/MS Pos	1025	1120	130.086	4043-87-2	849	C00408	HMDB00070	6.79676e+06	6285820	151160992	12439645	14128940	6301201	7477917	9596643	17432330	6.65209e+06	11024555	5772559	8212537	11110130	9525016	15220693	6421169	7.327e+06	12392015	59352172	36035096	565830656	20277510	17236044	13638233	24365776	20209378	15541919	9939834	11253555	37911728	10278482	44776008	32833272	24357352	15826544	25366224
1747	pregn steroid monosulfate*	Lipid	Steroid	32619	LC/MS Neg	100002067	5000	397.205	1247-64-9				370142	1816632	1.11462e+06	1.1049e+06	1.65605e+06	1.04237e+06	1.51806e+06	881390	145148	378878	146734	1.30336e+06	2.23469e+06	184253	651522	2.00009e+06	1.75276e+06	1.16889e+06	99291.2	660400	720415	779694	632394	950099	860709	491189	748502		538080	67240.1	651522	839423		787092	960403	771781	330919
1746	pregnen-diol disulfate*	Lipid	Steroid	32562	LC/MS Neg	100001993	3868	238.077					727985	3.67413e+06	7.04501e+06	2.50963e+06	13919849	3.32973e+06	6594696	5018221	1.61689e+06	1.84962e+06	2489788	2384410	18420080	2164105	659724	5091325	4.11384e+06	4.72241e+06	2.29403e+06	997861	1084615	3167270	1.0493e+06	6158442	5.26351e+06	2600028	2.09253e+06	470797	2292770	808319	825892	6.28388e+06	906219	595067	3.19781e+06	1.97017e+06	1.95226e+06
348	pro-hydroxy-pro	Amino Acid	Urea cycle; Arginine and Proline Metabolism	35127	LC/MS Pos	100001167	950	229.118	18684-24-7	11673055		HMDB06695	2.12718e+06	4.1515e+06	3802736	5545804	8.08396e+06	6.86944e+06	3483620	4872010	4.35642e+06	7.15829e+06	5.78984e+06	3.40524e+06	8.14007e+06	5.14644e+06	4.6089e+06	5.51139e+06	1.66192e+06	5.82267e+06	12942362	10867876	15025804	36002252	9247211	61287468	24871788	22006378	24183734	11928614	55097624	12299764	11698224	48248532	17175220	55911612	30562544	18416728	10783903
328	proline	Amino Acid	Urea cycle; Arginine and Proline Metabolism	1898	LC/MS Pos	480	805	116.071	147-85-3	145742	C00148	HMDB00162	2013378560	2178509824	2460338688	997652736	2066888576	799754496	1165713536	2390991872	2109161600	2940147456	2219750144	736500864	1027717312	789360192	1196359040	710849536	350927552	931472000	1428239360	3022794752	2895812352	2515553024	2302113280	2368910336	2011263616	2392078592	3429950720	4130484224	3567911936	3702629376	1975914496	1880331776	2225671424	2130315264	2204707584	1201403392	1813182976
656	prolylglycine	Peptide	Dipeptide	40703	LC/MS Pos	100003674	875	173.092	2578-57-6	7408076;6426709			4436665	6.86744e+06	10525531	3.23723e+06	2.00915e+06	4.43766e+06	1.1142e+06	6381834	8816480	6607857	5.86538e+06	2.07049e+06	1.14634e+06		1.33456e+06	557573		5329133	1.95142e+06	31878406	20066504	12742936	6.85173e+06	5.03569e+06	8403672	5.2277e+06	32009456	38495080	41846508	24741180	6179968	4.05512e+06	10125558	4886391	3.97392e+06	1.48778e+06	2.40278e+06
1215	propionylcarnitine	Lipid	Fatty Acid Metabolism (also BCAA Metabolism)	32452	LC/MS Pos	100001162	1590	218.139	17298-37-2	107738	C03017	HMDB00824	34631032	39672172	60762868	87401224	151769152	645975232	86781544	44152604	72807224	42097348	34832144	57542460	691710784	50722348	47801652	417081984	92284048	139866320	127073104	23676672	23883318	14261545	23263690	72728160	129386096	140196560	108424304	14479828	66732408	60466152	50473172	56419492	322680608	41295436	67613520	48269212	124461680
1313	prostaglandin E2	Lipid	Eicosanoid	7746	LC/MS Neg	487	4573	351.218	363-24-6	5280360	C00584	HMDB01220	546805			1.26342e+06			1.02328e+06	1.08999e+06	15448170	455822	3485374	153780	148330					2.74173e+06	2.4598e+06	993868		909571	1.14566e+06	450776	835947	12520355	993868	3.05996e+06	532305	2.35673e+06	456296	568646		422624			1.13867e+06
1324	prostaglandin F2alpha	Lipid	Eicosanoid	19398	LC/MS Neg	100000574	4658	353.233	551-11-1	5280363	C00639	HMDB01139	125510			71293				328883	3.18865e+06	220733	1.16262e+06							518022	298181	475157		443427	361758	70226	238212	1.71487e+06	599596	1.733e+06	371427	1.31012e+06		162305					517607
3324	pseudoephedrine	Xenobiotics	Drug	39586	LC/MS Pos	100002738	2312	166.123	90-82-4	7028	C02765	HMDB01943			1.97707e+06		141479168		106812584					147466	85531096	8698563	4707898	7.63824e+06	4.45038e+06		287173632					18356362		146872208					80106.4	4145620	49679456	11267840	14539085	5.63276e+06
2519	pseudouridine	Nucleotide	Pyrimidine Metabolism, Uracil containing	33442	LC/MS Pos	821	1173	245.077	1445-07-4	15047	C02067	HMDB00767	3.06233e+06	6.73341e+06	4.82802e+06	2.97288e+06	8.31489e+06	5075261	4265559	6624721	11444607	4854680	7333430	3.74357e+06	6344393	4.28961e+06	3.77911e+06	5.57913e+06	3.20925e+06	5381255	5.53946e+06	7.25767e+06	5243924	5.38827e+06	5.07225e+06	6588535	10448814	6566865	4.87264e+06	11167205	8039259	5.93733e+06	5553845	5.22805e+06	5295387	4.54112e+06	8612258	3.31545e+06	5.12256e+06
2632	pterin	Cofactors and Vitamins	Pterin Metabolism	43023	LC/MS Pos	100004216	1545	164.057	22363-60-4	73000	C00715	HMDB00802	443884		352976							235875	225731										101071	135424			205875		167286	258988	454035	747446					680264		52810.9
363	putrescine	Amino Acid	Polyamine Metabolism	1408	GC/MS	49	1705.8	174	110-60-1	1045	C00134	HMDB01414	47224.6	503168	402825	556982	542258	1.87681e+06	444175	488788	382788	285948	269061	362136	916375		313297	643354	325439	1.34674e+06	248555	10065989	6.39001e+06	4.82356e+06	1.31983e+06	1.8134e+06	2142863	1.28361e+06	1.76088e+06	1452084	879840	1.79553e+06	6779273	1208901	7.11417e+06	1.2835e+06	2.49326e+06	2.1118e+06	5136105
2668	pyridoxal	Cofactors and Vitamins	Vitamin B6 Metabolism	1651	LC/MS Pos	491	1203	168.066	65-22-5	1050	C00250	HMDB01545	461594	268635	1.3866e+06					389025		1.83777e+06					349259					3.7918e+06	2.34515e+06	1790165					2.40515e+06	1.64882e+06	1.57787e+06	2015100			4.51452e+06
2669	pyridoxate	Cofactors and Vitamins	Vitamin B6 Metabolism	31555	LC/MS Polar	100001121	846	182.046	82-82-6	6723	C00847	HMDB00017	62873.9	131673	163466	463365	212115	160307	313975	115057	209792	216211	282621	92601.8	174208	166625	193618	109173	390336	180138	198496	48095.7	51144.9	69724	483330	62543.4	179524	146421		45453.3	232189	417688		49994.4		211407		426394
49	pyroglutamine*	Amino Acid	Glutamate Metabolism	46225	LC/MS Pos	100001540	750	129.066	2353-44-8	134508			80470624	44705928	65302392	62641240	136136400	285717152	192407920	137812704	229897456	190030528	195547856	174843872	190042592	71017016	69981496	193505808	137407280	190750496	70315992	524887904	75044824	164656912	190521248	302761472	270735072	317200480	395933376	357017024	525456576	231578944	1027898496	237103520	455863648	345038528	167616640	238292320	1119797376
3098	pyrraline	Xenobiotics	Food Component/Plant	48428	LC/MS Neg	100001767	2304	253.119	74509-14-1						90755	128333	39690				307413										61492			477300	64345.3					96339				42599	353808
812	pyruvate	Carbohydrate	Glycolysis, Gluconeogenesis, and Pyruvate Metabolism	22250	LC/MS Polar	823	2650	175.025	127-17-3	1060	C00022	HMDB00243	93372.3	172031	356741	1.08046e+06	947989	2114220	259078	161640	1.54048e+06	689706		274344	700828	145853	213539	861784	569337	867338	475785	1.18186e+06	1.31701e+06	2.0492e+06	1.26844e+06	930378	1.64858e+06	1.44276e+06	1847991	1.61976e+06	994325	974883	528149	1.47262e+06	2.33455e+06	1.08046e+06	1.80015e+06	1.12868e+06	1.42673e+06
3026	quinate	Xenobiotics	Food Component/Plant	18335	LC/MS Polar	100000442	2432.9	191.056	77-95-2	6508	C00296	HMDB03072	772048	452491	670292	2.14751e+06	1.00431e+06	1.44353e+06	384435	279243	503418	184708	177000	2.93545e+06	997372	310361	422382	639014	486155	963097	162107	264145	428940	569558	1.57218e+06	1.04877e+06	769938	470461	393046	216353	105760	204764	2716762	854192	222403	452491	398026	411769	1.60213e+06
2565	quinolinate	Cofactors and Vitamins	Nicotinate and Nicotinamide Metabolism	1899	LC/MS Neg	182	630	166.015	89-00-9	1066	C03722	HMDB00232	144773	395699	786099	509952	3580510	104707	1.00248e+06	1.34451e+06	398187	243282	1.41124e+06	523772	906303	2.34217e+06	893884		371819	214672	8698417	12574610	12484108	2.68718e+06	7.05261e+06	5.27702e+06	5.88582e+06	11718914	11635585	3.10056e+06	5.18345e+06	19311632	1994987	5461741	7.03806e+06	5291615	13977600	6658531	322435
832	ribitol	Carbohydrate	Pentose Metabolism	15772	LC/MS Polar	100000406	1789.6	151.061	488-81-3	6912	C00474	HMDB00508	298202	526896	1.0415e+06	620990	840052	2931208	439460	523382	542434	1.58691e+06	434730	220411	1239573	371933	538334	354671	240713	806015	775107	1.72944e+06	7361597	2.96985e+06	2.92252e+06	4621529	3522975	1.69363e+06	1.78046e+06	1.78444e+06	1.87943e+06	684046	2523266	4.4838e+06	4.12858e+06	7170807	1.33827e+06	1.23273e+06	633391
2591	riboflavin (Vitamin B2)	Cofactors and Vitamins	Riboflavin Metabolism	1827	LC/MS Pos	500	3098.3	377.146	83-88-5	493570	C00255	HMDB00244	731272	387259	1426616		236619	150456		451826		1.66776e+06	114653				279156					712112	887453	919008	242655	530463	492842	464648	708664	1.07246e+06	521896	852016	153112	455588		480021	371609	153492
833	ribonate	Carbohydrate	Pentose Metabolism	27731	LC/MS Polar	100001007	2425	165.04	5336-08-03	5460677	C01685	HMDB00867	2.46642e+06	3.63686e+06	4.39189e+06	3.63975e+06	5.07242e+06	4.00753e+06	1.93807e+06	2.365e+06	4.17624e+06	4769775	2.13515e+06	3.1748e+06	3.50488e+06	2.27247e+06	4.53137e+06	5.01393e+06	2.16078e+06	4.31159e+06	1.74375e+06	7.43813e+06	16380908	8172307	6984317	9194832	7030468	5.87666e+06	7386324	7.61299e+06	5425754	4.57831e+06	10141997	6795952	15081096	5.8266e+06	8305668	6111856	7.06617e+06
831	ribose	Carbohydrate	Pentose Metabolism	1471	LC/MS Polar	914	1508.2	195.051	50-69-1	5779	C00121	HMDB00283	1.54355e+06	1307448	3.9673e+06	1175311	3.34902e+06	7.09896e+06	1.26622e+06	2382915	1.52015e+06	6137470	1.47778e+06	525087	1.62299e+06	1278926	1502173	436380	636252	2618543	3.13978e+06	4.26709e+06	7.07597e+06	4.8767e+06	1334398	5055082	3237606	1.96216e+06	3752656	940636	2445154	4149235	1.28128e+06	3.45825e+06	5014911	1.5731e+06	1618887	1.25351e+06	703407
822	ribose 1-phosphate	Carbohydrate	Pentose Phosphate Pathway	1763	LC/MS Polar	219	4025	229.012	50-99-7;58459-37-3	439236	C00620	HMDB01489		211526	319383	1.71953e+06	1.47511e+06	3.52558e+06	553778	80004.7	715247	350056	460985	644925	2.91414e+06	380942	651481	3.43288e+06	4.10365e+06	1.4603e+06	330145	770118	1139332	669196	1.41655e+06	973800	606503	1.21173e+06	311418	457897	154458	306249	2.6684e+06	803180	804260	1.96265e+06	2.00489e+06	2078505	1.38533e+06
821	ribose 5-phosphate	Carbohydrate	Pentose Phosphate Pathway	561	GC/MS	19	1928.4	315.1	18265-46-8;108321-05-7		C00117	HMDB01548	25694.1		74006.3	235013	525993	257622	28405	48213.2	87159.6	39953.7	27557.4	33475.8	215923	126524	35894.6	211252	212613	97915.9	30981.1	216696	40148.9	32422.7	63916.8	199356	40612.6	70625.3	52432.7	37088.9	31612.6	42500.6	115068	115045	429992	37884.4	79395.2	139410	140341
829	ribulose	Carbohydrate	Pentose Metabolism	35855	GC/MS	100000147	1662	306.1	488-84-6	151261	C00309	HMDB00621	32016	60530.1	86917.5	131613	154886	260927	57986.5	41997.2	127532	159364	52117.9	44071.7	77820	57305.3	61734.3	36703.6	26169.8	91625.9	102810	218563	191723	105836	85372.2	262789	103234	91213.2	107596	70400.9	64518.7	157199	31337.5	161659	304999	54518.7	56584.8	65672.7	68779.5
826	ribulose/xylulose 5-phosphate	Carbohydrate	Pentose Phosphate Pathway	37288	GC/MS	100002179	1935	357.2			C00199		104589	163084	158904	995074	950093	951445	287485	133523	231852	145246	64066.8	348885	908230	339033	264290	477846	452812	623962	216992	440870	220603	165270	204865	591075	139871	351054	159937	84020	73554.4	240434	194284	406654	427710	263285	431142	626823	303766
3385	rocuronium	Xenobiotics	Drug	52381	LC/MS Pos	100006745	2623	265.204	143558-00-3	9849870						76241392	265225632	119423416	157609712	1799780	2.89229e+06	716711	73086088	103838112	207803600	147504976	101494560	151163248	34532728	230674976	160600944				98353432	128854480	133388776	111678808	1.63365e+06			96273960	95891328	128793376	103675848	73736680	133626040	39551160	81791880
298	S-adenosylhomocysteine (SAH)	Amino Acid	Methionine, Cysteine, SAM and Taurine Metabolism	42382	LC/MS Pos	197	1495.9	193.068	979-92-0	439155	C00021	HMDB00939		1.06956e+06	1.84542e+06	6.52935e+06	12614359	11021743	7.08379e+06	736775	5.52931e+06	3.06673e+06	935624	6872981	10727462	3.18321e+06	11021743	11579841	4.39682e+06	11693872	5008636	11681596	27866610	24294150	15147377	24605044	12410737	12279889	6357528	7.48793e+06	2.66361e+06	2.31199e+06	22389006	20787654	55185252	23026560	35048464	17827248	16146585
297	S-adenosylmethionine (SAM)	Amino Acid	Methionine, Cysteine, SAM and Taurine Metabolism	15915	LC/MS Pos	1263	670	399.145	24346-00-7;86867-01-8;86867-0108	34755	C00019	HMDB01185				409106	608253	529641						246204	1.00057e+06	80925.1	373179	1.64262e+06	1.0117e+06	1.03664e+06		3237123	7.11942e+06	4777067	5238995	8803493	709908	838925					2.56968e+06	9064374	15614398	3.62157e+06	5855905	6734586	10470447
382	S-lactoylglutathione	Amino Acid	Glutathione Metabolism	15731	LC/MS Neg	1343	1248	378.098	54398-03-7	440018	C03451	HMDB01066				931491	859900	1.19619e+06	155063					1254139		84464.3	80954.1	170581	843674	4.00617e+06					21936612	6.99524e+06	2.86266e+06	15999773					31612744		8453089	15212481	5469391	2.89167e+06	6.48493e+06
310	S-methylcysteine	Amino Acid	Methionine, Cysteine, SAM and Taurine Metabolism	39592	LC/MS Neg	100002749	880	134.028	1187-84-4	24417		HMDB02108	922499	486057	708079	424084	903456	363210	461407	924648	768506	1.05663e+06	708734	939871	786271	301133	536240	708594	741433	565062	382367	2103417	1.65893e+06	2.21782e+06	860169	1.19323e+06	795357	1.15397e+06	2.24945e+06	754236	901918	885766	1.41753e+06	1.46408e+06	939234	1.12738e+06	1.61617e+06	2.09356e+06	1.51702e+06
381	S-methylglutathione	Amino Acid	Glutathione Metabolism	33944	LC/MS Pos	100001259	1600	322.107	2922-56-7	3605667	C11347							184858						343014				578760	298473	144878			187607	195441	440413	724119	182825	265585					283466	660344	1.65879e+06	428490	1.923e+06	379735	975097
3334	salicylate	Xenobiotics	Drug	1515	LC/MS Neg	501	2195	137.024	69-72-7	338	C00805	HMDB01895	141791	1.09552e+06		458135		327803	136495	344445		111009	2790572					8.09345e+06	476612	2.88628e+06		155913							476612	43519.7		1.47094e+06			1.27492e+06		1.09167e+06		718891
4	sarcosine (N-Methylglycine)	Amino Acid	Glycine, Serine and Threonine Metabolism	1516	GC/MS	1023	1182.9	116	107-97-1	1088	C00213	HMDB00271		336528	279580	741472	931423	561422	199028		920611	663416	230496	289202	1.13123e+06	217802	273248	1.68574e+06	366622	373653	412312	1.04561e+06	1.35005e+06	1.27001e+06	1.94136e+06	1.08081e+06	618294	502463	392204	1112508	1.00131e+06	497131	532201	1.08512e+06	1.03862e+06	1199444	768782	378943	755069
1393	scyllo-inositol	Lipid	Inositol Metabolism	32379	GC/MS	100001215	1893.8	318.2	488-59-5	892	C06153	HMDB06088	1064672	761718	1.01526e+06	676269	609357	1.56967e+06	303423	1.20404e+06	709910	5.72841e+06	376434	334393	1.56728e+06	1.66863e+06	1278374	728880	286638	270271	625385	1.47788e+06	1.6954e+06	796395	642916	988010	1.58063e+06	1.94401e+06	3.55752e+06	1.89379e+06	2.50325e+06	1.70976e+06	362576	1.59857e+06	3.00081e+06	1.64866e+06	1.19438e+06	939456	242014
1145	sebacate (decanedioate)	Lipid	Fatty Acid, Dicarboxylate	32398	LC/MS Neg	100001211	1788	201.113	111-20-6	5192	C08277	HMDB00792	714498	3066583	2.25717e+06	2.80059e+06	591710	746217	891690	396333	647959	702880	686771	1119123	454397	408329	613406	514987	624184	534945	565928	1.24745e+06	1.29078e+06	434587	625382	472437	941400	949535	829471	354938	523711	791890	976827	423798	667365	504955	618758	687504	589671
824	sedoheptulose-7-phosphate	Carbohydrate	Pentose Phosphate Pathway	35649	GC/MS	100001628	2070	691.35	2646-35-7	616	C05382	HMDB01068	10092.1	14661.7	20368.3	67035.9	31501.9	227538	19511.7	24648.2	5453.77	60662.6	21318.8	81728.1	63812	9901.85	17700.3	39219.4	19841.8	51906.4	24655.8	48291.9	73062.1	59217.8	20842.1	166465	12381.6	62286.5	50765.8	27990	23966.3	133420	21994.9	96014.6	372920	110721	49756.7	35607.2	11360.5
9	serine	Amino Acid	Glycine, Serine and Threonine Metabolism	1648	LC/MS Pos	503	676.7	106.05	56-45-1	5951	C00065	HMDB00187	130488584	144149568	171366544	83425904	86718744	58822976	65169096	188297536	123279768	187564992	147207424	57962280	51115368	36903552	77787032	36505032	27546684	93773752	68960304	206322176	235662416	224154304	111292432	97090712	123492904	120010912	304171520	248330896	253025968	255261200	61243720	102573960	97493440	93338936	80575544	47253916	87585976
903	sorbitol	Carbohydrate	Fructose, Mannose and Galactose Metabolism	15053	GC/MS	506	1843	319.1	6706-59-8	5780	C00794	HMDB00247	187694	470981	468617	646439	311127	4.73189e+06	202232	134399	704433	610110	122102	196058	1.91932e+06	75266.9	154432	1924996	1.15705e+06	621831	225816	636240	1.86175e+06	822396	227800	1.61302e+06	659246	267720	225429	381452	325287	325547	280305	2353156	1.41012e+06	1022799	599517	594015	459766
365	spermidine	Amino Acid	Polyamine Metabolism	485	LC/MS Pos	50	533.5	146.165	124-20-9	1102	C00315	HMDB01257	26699606	26468140	55726008	127863632	561988416	154282288	206019472	204461936	192228496	225034992	390995264	143427552	61958604	48420984	87325792	43829132	199580496	169085920	125941920	89226720	66346828	67127424	343970304	602100352	222565088	699383808	79174088	456301888	236927680	279712480	313750112	99252928	352145472	444018240	198306416	198896912	238072560
364	spermine	Amino Acid	Polyamine Metabolism	603	LC/MS Pos	507	500.4	203.223	71-44-3	1103	C00750	HMDB01256	2700399	1.8471e+06	4.22501e+06	68157704	452287360	78072576	97019248	91905656	187765344	107658840	405818048	41399188	10633351	31693910	26043466	4562115	101456616	56958384	27309210	5.06996e+06	2238869	2.50825e+06	310585504	154145952	31041920	586818112	3133852	358029536	57594912	66060752	399574464	3.34824e+06	32382428	224973808	30379144	49129072	70903112
1634	sphinganine	Lipid	Sphingolipid Metabolism	17769	LC/MS Pos	313	5178.3	302.305	3102-56-5	3126	C00836	HMDB00269		1081346								558685		830871				875912	995420					1.26855e+06	631537		463890							1.19336e+06	2.93116e+06		2.02761e+06	953489
1653	sphingomyelin (d18:1/14:0, d16:1/16:0)*	Lipid	Sphingolipid Metabolism	42463	LC/MS Polar	100004328	873	719.534		11433862			2.49054e+06	1.28845e+06	1.16381e+06	942691	981218	685167	1.34971e+06	1.28774e+06	915087	686565	989778	1.11466e+06	524979	2.3501e+06	2.0826e+06	650946	689993	922352	2.20863e+06	1.72538e+06	1429473	797887	1.25546e+06	1.01661e+06	1387686	1090827	921601	916053	1.27312e+06	1.53391e+06	1.26927e+06	940352	1025001	1.18245e+06	986426	1.1303e+06	1.10999e+06
1656	sphingomyelin (d18:2/16:0, d18:1/16:1)*	Lipid	Sphingolipid Metabolism	42459	LC/MS Polar	100004329	866	745.55					1.26785e+06	1.20916e+06	828005	1.01867e+06	1.23721e+06	807059	1.10402e+06	1.49969e+06	1.02654e+06	364382	876527	1.07108e+06	747731	2113889	1.13568e+06	1150472	522252	1.44655e+06	2452188	1.23175e+06	1.35077e+06	588359	1.09175e+06	2.04704e+06	1.18374e+06	677849	1.06535e+06	2.37488e+06	1079366	1419126	1.02288e+06	1.27218e+06	1.27864e+06	910838	1.74502e+06	1.70807e+06	992904
1643	sphingosine	Lipid	Sphingolipid Metabolism	17747	LC/MS Pos	297	5179.9	300.29	123-78-4	5353955	C00319	HMDB00252	1.11002e+06	4.00472e+06	1.39456e+06	2.06578e+06	1.61008e+06		1.6647e+06	1.73724e+06	2.26195e+06		2.30607e+06	2.7757e+06	243279	447811		1.13796e+06	1074824	3.64922e+06	1.93834e+06	2.56489e+06	7525018	2.67109e+06	2.11444e+06	5.63758e+06	2.57679e+06	4009898	2.91401e+06	3.11651e+06	2.42419e+06	1582927	2.38014e+06	14346828	27171016	4022028	3.9989e+06	2.35478e+06	1.55277e+06
3048	stachydrine	Xenobiotics	Food Component/Plant	34384	LC/MS Pos	100001296	838.7	144.102	4136-37-2	115244	C10172	HMDB04827	19472598	21438328	12383110	16234265	54272480	47414720	5628479	8493428	4508557	7365356	3.72021e+06	14924284	69182720	103030808	19568428	143068256	1.41933e+06	2.30898e+06	41384616	21803126	29191634	12762545	8392476	72295200	34663984	6.67891e+06	11420491	2.81075e+06	7.76706e+06	4.10525e+06	15754259	63616492	169725424	25151426	164157872	1.76259e+06	2.9523e+06
1022	stearate (18:0)	Lipid	Long Chain Fatty Acid	1358	LC/MS Neg	439	5872	283.264	57-11-4	5281	C01530	HMDB00827	4030892544	3441908736	5517698048	3598931968	4397119488	2922284288	3459696640	4899988992	4659854848	4977468928	4504119296	3274939136	2762093568	2606866432	3422655232	3097304832	2933925376	4613579264	4495797248	6759358464	7732353024	5658062848	4514214912	4901085184	5721789440	5524014080	5902927360	6274150400	8185959936	5498520576	5906834944	4540354560	4883625472	6382407680	5136700416	3998549760	3046769664
1049	stearidonate (18:4n3)	Lipid	Polyunsaturated Fatty Acid (n3 and n6)	33969	LC/MS Neg	100001229	5395	275.202	111174-40-4	5312508	C16300	HMDB06547	6.11119e+06	3.20578e+06	7.11637e+06	7160533	2.0466e+06	1.80293e+06	1.93112e+06	4.98862e+06	2.46144e+06	3.00745e+06	3.57332e+06	1712895		1.19005e+06	3.2915e+06	1.09403e+06		1.94042e+06	3.29901e+06	12787410	12921530	7.3803e+06	4719613	1.59238e+06	2.32702e+06	1.44106e+06	6560671	5700240	3.87509e+06	7.34266e+06	1.38109e+06	1.94358e+06	3.66655e+06	1.96954e+06	1.30976e+06	1.18741e+06
1638	stearoyl sphingomyelin (d18:1/18:0)	Lipid	Sphingolipid Metabolism	19503	LC/MS Polar	1538	979	775.597	85187-10-6;85187-10-6	6453725	C00550	HMDB01348	715084	712263	324127	916700	535429	917087	345721	447301	435580	470257	464237	803255	759481	554882	379216	468786	654564	407403	242440	292594	131648	112412	288491	145305	433806	188125	199331	113379	128435	208127	188903	391992	94411.7	186630	137591	139853	113931
1242	stearoylcarnitine	Lipid	Fatty Acid Metabolism(Acyl Carnitine)	34409	LC/MS Pos	100001391	5256	428.373	18822-91-8	6426855		HMDB00848	291705	1406993	833022	1.59251e+06	1.20114e+06	1.33855e+06	1.16731e+06	2.1602e+06	1.91886e+06	613649	1.16366e+06	2480701	1223391	1.08201e+06	1.12499e+06	4.33768e+06	975759	3.94249e+06	1.19388e+06	5447896	5959586	4.41177e+06	5.46852e+06	6089900	3.78072e+06	2799050	6146502	6120945	8550575	2.84452e+06	13864200	2.92109e+06	11731707	3.31687e+06	3.69519e+06	6.90239e+06	1.92033e+06
987	succinate	Energy	TCA Cycle	1437	LC/MS Neg	252	603	117.019	110-15-6	1110	C00042	HMDB00254	15123967	12489821	13595625	35435552	42851548	375956416	41005388	10914440	54028080	19727604	8.29095e+06	74486704	145261088	78691160	53782312	829147840	376856896	217400720	38145748	16637894	208971152	139611328	24222418	102724768	25922428	25191284	7444844	7711513	7.65715e+06	6236883	428025312	189653808	359661632	33364152	269875808	346189376	522743008
986	succinylcarnitine	Energy	TCA Cycle	37058	LC/MS Pos	100001948	1419	262.129					1.61429e+06	567868	1.55901e+06	7298834	20304258	249441712	4.73264e+06	808655	6699153	8902604	405247	1185451	126221536	2091508	5083542	12123652	4.11066e+06	7108758	1.60985e+06	1.10406e+06	3.35185e+06	9604525	1219295	2.05592e+06	17021800	7.03283e+06		609916			994804	1.35209e+06	3814981	2.74941e+06	5998649	4187836	5425665
3423	sulfate*	Xenobiotics	Chemical	46960	LC/MS Neg	100002528	616	96.9601	14808-79-8	1118	C00059	HMDB01448	26263528	49547760	24176968	22552760	26556012	9190250	26207480	18816688	25589524	15751820	35883452	41543528	20198658	28016320	23431704	33490186	19612388	46242980	29020382	25804978	23804336	21301710	15262428	22748352	20752768	37866152	16623450	20786824	23064942	26045396	32335196	17661164	7.40137e+06	20204352	50145636	19930838	32757888
3125	tartronate (hydroxymalonate)	Xenobiotics	Bacterial/Fungal	20693	LC/MS Neg	100000840	610	118.999	80-69-3	45	C02287	HMDB35227	2.5952e+06	5.00971e+06	3.94942e+06	1.30895e+06	4857191	489345	2.01726e+06	6156594	3.46164e+06	2.46673e+06	1.58497e+06	2669921	1.68255e+06	2.10233e+06	3.94182e+06	1.84861e+06	2301958	3.68003e+06	1.62554e+06	6090078		1.05006e+06	6.50613e+06	1.51036e+06	2382715	2413363	7.38407e+06	9816054	6.36659e+06	2.78613e+06	3077794	1.04547e+06	2107261	2.71189e+06	1.31967e+06	1.04169e+06	1.96444e+06
317	taurine	Amino Acid	Methionine, Cysteine, SAM and Taurine Metabolism	2125	LC/MS Neg	512	690	124.007	107-35-7	1123	C00245	HMDB00251	138324944	200482848	303161408	269621376	299103200	631748160	304263264	190171504	427139936	212748464	279481568	172911200	623873728	74467640	210889392	543404160	538065664	430555136	180569680	467129120	386670176	366780256	310437632	271419168	381318240	408150816	407050368	371894688	305118240	321793856	342540960	282988544	201063472	522249120	345016448	305973184	215638640
1845	taurochenodeoxycholate	Lipid	Primary Bile Acid Metabolism	18494	LC/MS Neg	1629	5250	498.289	6009-98-9	387316	C05465	HMDB00951					1.23297e+06						953828	321537	659150	679060				5086693	1.32822e+06					368133							190731	402647	250948				3.96305e+06
1842	taurocholate	Lipid	Primary Bile Acid Metabolism	18497	LC/MS Neg	1648	5150	514.284	145-42-6	6675	C05122	HMDB00036					1.26933e+06						363777		738850	37402.6				728023	621215					349118								387676					387676
1881	taurocholenate sulfate	Lipid	Secondary Bile Acid Metabolism	32807	LC/MS Neg	100001990	4750	279.614						201533	700306		1607305	413725	364782	142455	535032	161992	831392	536561	1637164		293730		223987	902588				249105		919489	746699	110064			121450	251011	117262	1.31714e+06		304832			404370
1860	taurolithocholate 3-sulfate	Lipid	Secondary Bile Acid Metabolism	36850	LC/MS Neg	100001658	5026.7	280.622	64936-83-0	440071	C03642	HMDB02580			669796		912646		1.09584e+06				333067		776722		183743					143334		159026			164687	347018
2736	theobromine	Xenobiotics	Xanthine Metabolism	18392	LC/MS Pos	100000445	2151	181.072	83-67-0	5429	C07480	HMDB02825
2737	theophylline	Xenobiotics	Xanthine Metabolism	18394	LC/MS Pos	100000437	2531.8	181.072	58-55-9	2153	C07130	HMDB01889
2656	thiamin diphosphate	Cofactors and Vitamins	Thiamine Metabolism	35670	LC/MS Neg	522	1195.1	423.03	154-87-0	1132	C00068	HMDB01372		32647.4	41643.5	43205.7	53833.1	46138.3			110339	83256.7		77600.2	56591.9		39108.3	47763.7	248947	86030.8		288823	249914	150132	272721	69274.9	185316	160914	186894	155730	112597	196733	347672		256326	146660	209053	187507	140101
842	threitol	Carbohydrate	Pentose Metabolism	35854	GC/MS	100001419	1513	217.1	2418-52-2	169019	C16884	HMDB04136	90565.5		59575.1	71674.6	84454	227745	84231.9	83502.4	331232		48595.6	64070.2	164699	163005	130892	83319.3	75196.4			67234.7		65205	28879.8	189213	98803	135184		217665		112421	105951	134726		85653.5		96363.5	118537
2604	threonate	Cofactors and Vitamins	Ascorbate and Aldarate Metabolism	27738	LC/MS Polar	100001022	2384	135.03	70753-61-6	151152	C01620	HMDB00943	54300620	156623408	79388520	149111712	173189072	73278704	71803480	153761216	138081232	73707136	55772656	187207792	156498112	63124144	164485968	198886720	62793788	135125344	73547832	306041440	517469664	250452496	309021760	189394912	211607008	195241360	601451072	504660992	174454368	74197768	159307648	372875104	705035008	206185600	228882176	88900384	167195888
14	threonine	Amino Acid	Glycine, Serine and Threonine Metabolism	1284	LC/MS Pos	564	701.5	120.066	72-19-5	6288	C00188	HMDB00167	144050272	182652688	215795200	110778464	184540112	109656504	126814136	251765856	248495936	253459296	252195952	76784456	112679064	42067500	100107104	80196552	46218324	143960160	102604560	376613120	409044288	343493504	218745776	195801744	215965424	252503856	500523296	520635584	379268704	407814912	122957024	193156912	182449248	183795056	227289680	105542464	172388544
696	threonylphenylalanine	Peptide	Dipeptide	31530	LC/MS Pos	100001125	2452	267.134	16875-27-7	4099799;4099798							916246	854262				664772			1190046		269058	3.53054e+06	493329	1.64076e+06	505219	449970	2698563	1006091		3.12053e+06	566724	1.59532e+06		555513			1.47501e+06	3.29494e+06	10695408	1.36915e+06	898682	411239	1.06776e+06
2560	thymine	Nucleotide	Pyrimidine Metabolism, Thymine containing	604	LC/MS Neg	882	1654	125.036	65-71-4	1135	C00178	HMDB00262	374775	514051	615386	415772	1.5082e+06	390646	366396	768132	1.51931e+06	375718	1.12199e+06	353753	334465	163063		776303	302033	521769	1.81392e+06	6192019	2265950	1.69115e+06	5264299	760567	2.44597e+06	2.72026e+06	1.93995e+06	13478859	1.09576e+06	1.44113e+06	4.48503e+06	663872	1.72078e+06	2.8434e+06	1.51676e+06	3.74892e+06	1.41158e+06
272	tiglyl carnitine	Amino Acid	Leucine, Isoleucine and Valine Metabolism	35428	LC/MS Pos	100001597	2354	244.154	64191-86-2	22833596		HMDB02366	1.27861e+06	1.84821e+06	2.81444e+06	5486928	4716616	10034584	3.58063e+06	855249	6.85151e+06	1.65351e+06	2.87278e+06	622051	11266532	1.23523e+06	2331733	9908330	8906367	4.0832e+06	1066517	888886	2.30612e+06	1.59497e+06	1.57094e+06	1.58282e+06	3468499	4027610	1.05858e+06	798396	1.65338e+06	4264941	781157	1.67664e+06	1.43279e+06	2.4034e+06	3.91997e+06	1.94021e+06	2.72349e+06
346	trans-4-hydroxyproline	Amino Acid	Urea cycle; Arginine and Proline Metabolism	32306	LC/MS Pos	1001	685	132.066	51-35-4	5810	C01157	HMDB00725	9928043	7805449	8640180	9492892	14966153	10150512	8839931	11727068	8992894	17005214	10269366	7.44693e+06	14877348	16039728	8103383	13294575	7.34176e+06	10152803	33484548	28033204	19224656	53023796	28213880	43514012	26883062	31633110	32675362	20872364	55265936	17939962	15565087	38707408	37305492	34758172	38299900	32083862	19692024
60	trans-urocanate	Amino Acid	Histidine Metabolism	607	LC/MS Pos	537	1125.4	139.05	104-98-3	736715	C00785	HMDB00301	3638605	9201194	6.06912e+06	3668312	2.68858e+06	15110949	7694214	5525202	7.21598e+06	2.92356e+06	3.97747e+06	6.86414e+06	4063143	1.52602e+06	5.83822e+06	61212992	12508574	3634326	1.66019e+06	3698019	3.17259e+06	3.47852e+06	2.4015e+06	4247991	9120406	2.11369e+06	7055466	11623904	2.03317e+06	1.16716e+06	8.00687e+06	1.57478e+06	595965	1.0068e+06	5214207	15340147	8604032
2586	trigonelline (N'-methylnicotinate)	Cofactors and Vitamins	Nicotinate and Nicotinamide Metabolism	32401	LC/MS Pos	100001092	771.8	138.055	535-83-1	5570	C01004	HMDB00875	2.2027e+06		1.0693e+06	4.6735e+06	2.44939e+06	700014	3.04662e+06	720406	3.47784e+06	1.64798e+06	1.42137e+06	9427868	1.11384e+06	2.12484e+06	1.69677e+06			702090	1.65478e+06	13732794	1.32761e+06	1.69912e+06	12179321	2568067	2.7124e+06	2.96965e+06	1.89456e+06	2.62265e+06	2395388	1.55144e+06	13356509	2495608	1.36641e+06	3.62013e+06	1.46258e+06	2.03692e+06	8747929
193	tryptophan	Amino Acid	Tryptophan Metabolism	54	LC/MS Pos	565	2440	205.097	73-22-3	6305	C00078	HMDB00929	300947360	355517600	467091104	202505216	249220000	235917888	267033648	432992576	423724352	276601152	268749888	182720512	222107552	68756440	235770608	218225440	133391560	298640704	116867584	402036736	707664960	535519168	242940592	361042784	370439296	122351600	487160384	541263616	542524608	460364736	191070672	336265248	419069856	349184352	47938124	215602912	413950784
227	tryptophan betaine	Amino Acid	Tryptophan Metabolism	37097	LC/MS Pos	100001743	2466	247.144	20671-76-5	442106	C09213	HMDB61115	1.03281e+06	458128	1.09449e+06	8470731	2.3116e+06	3001684	1.40336e+06		3.21884e+06		3.08993e+06	3.35104e+06	3.91474e+06	2.63658e+06	5011192	2.30061e+06	1.1871e+06	519013	3.84305e+06	2.87374e+06	2.23447e+06	1.69088e+06	8.00298e+06	2.61045e+06	2861924	2774105		2667618	893129	9955833	5.6334e+06	2.22469e+06	15445674	9701639	5.51229e+06	3105158
705	tryptophylglycine	Peptide	Dipeptide	43028	LC/MS Pos	100003609	2364	262.119	7360-09-0	263471				3.06344e+06	1480529			582120			190053									216775		600460	5.64919e+06	2.73181e+06		752286	611800							497008	1248321
111	tyrosine	Amino Acid	Phenylalanine and Tyrosine Metabolism	1299	LC/MS Pos	815	1516.3	182.081	60-18-4	6057	C00082	HMDB00158	557965248	796928384	863316288	511668032	811156288	478866464	550680000	1015044992	990771776	3241293824	1090668544	417246336	401647104	197683664	435703008	393843520	204730640	615411648	412736416	1555877376	1680352256	1282882048	815351936	865433024	1042547584	1123165696	1698706816	1757508736	1485583872	1498411264	564677568	748695872	861552320	859788352	1011910528	565609728	674921216
932	UDP-galactose	Carbohydrate	Nucleotide Sugar	15860	LC/MS Polar	100000298	4000	565.048	2956-16-3;91183-98-1;137868-52-1	18068	C00052	HMDB00302				87408.5	237595							412151				181331	296683	308540		232447	821077	311640	217140	777324		142681					608186	626739	2.45246e+06	1.07005e+06	292062	1.56103e+06	258620
928	UDP-glucose	Carbohydrate	Nucleotide Sugar	32344	LC/MS Polar	1096	3950	565.048	117756-22-6	8629	C00029	HMDB00286												513884	126372			307462	384318	126864		95497.8	1167214	71928.4	63054.2	474608							525675	338448	5759368	209194	48866.9	880039	335880
933	UDP-glucuronate	Carbohydrate	Nucleotide Sugar	2763	LC/MS Neg	1097	588	579.027	28053-08-9;63700-19-6	17473	C00167	HMDB00935				242182	1.72636e+06	58638.7			215599			1.881e+06	840012	414675	490459	2.59304e+06	2.18057e+06	1.47867e+06	283027	781326	2.42605e+06	691165	828520	1.34864e+06	346006	2.07729e+06	861606	358456			2.60603e+06	2.37963e+06	5812341	2.2612e+06	5.58567e+06	4778721	4504470
937	UDP-N-acetylglucosamine	Carbohydrate	Nucleotide Sugar	35162	LC/MS Polar	1249	3708.7	606.074	91183-98-1	445675	C00043	HMDB00290				253777	1.76104e+06	673118	16703.4		195531			667519	1.43881e+06	223484	154760	2.0897e+06	1.11853e+06	1.59993e+06	563307	593607	2283574	781018	1847308	7.19455e+06	584148	3.12055e+06	219364	46243.2			3.54972e+06	4655473	11715036	3811458	3451700	11370145	7.3406e+06
2518	uracil	Nucleotide	Pyrimidine Metabolism, Uracil containing	605	LC/MS Polar	825	1089.7	111.02	66-22-8	1174	C00106	HMDB00300	29999628	83137912	75753632	39566856	83424800	33100034	38425720	116955824	151839616	104786232	83498120	31272354	23146712	12148680	18652278	42956960	22033738	54788988	74005416	175057792	191982736	170970816	142724368	121567920	133634824	144935984	209298528	195982576	179930736	207629056	79964280	98158112	107349816	112328320	122471224	102654904	60470580
2438	urate	Nucleotide	Purine Metabolism, (Hypo)Xanthine/Inosine containing	1604	LC/MS Neg	1134	757.1	167.021	69-93-2;120K5305	1175	C00366	HMDB00289	146812640	124153792	162328320	107798624	234674352	107862616	127364032	135244704	112366872	271482240	115239048	146111472	132939448	211893424	175620672	119625296	108217176	162094672	155546704	67296816	76709592	97191680	101334824	156653632	186588432	120251800	127849736	115384528	291467776	140355568	96915504	148488784	59898768	120179416	102180592	106556928	124080288
326	urea	Amino Acid	Urea cycle; Arginine and Proline Metabolism	1670	LC/MS Pos	533	739	121.072	57-13-6	1176	C00086	HMDB00294	37985176	65577060	44380680	50468828	54856700	20043654	66878692	33183014	39755588	28325644	48340208	99657560	28973788	41691516	39990300	37643508	29282902	56400940	14422123	27857802	28599582	32243740	50752712	47924228	39170276	51874704	8142318	28355898	24146082	38141784	70238128	45311900	10046899	29560920	33109204	21882704	46059940
2517	uridine	Nucleotide	Pyrimidine Metabolism, Uracil containing	606	LC/MS Neg	535	1457.6	243.062	58-96-8	6029	C00299	HMDB00296	274113376	413770464	302599648	245660048	300250944	202568080	258712736	346594496	287927072	389532192	308571936	387654176	135973776	204729936	277880480	191059712	137072272	314526368	158936624	362757472	410773632	130452560	267530464	165126304	144606800	302172800	267433760	349566144	224709168	166344816	295249920	112002688	284346496	427535552	135509696	167969136	65655144
2537	uridine 2'-monophosphate (2'-UMP)*	Nucleotide	Pyrimidine Metabolism, Uracil containing	52444	LC/MS Neg	100008975	824	323.029					3.97761e+06	9773048	6248064	6.63539e+06	4.75986e+06	695817	4963028	18539298	8955154	2897010	5118772	10899341	2.12329e+06	3077125	1.56289e+06	2.47583e+06	1.58021e+06	13739078	3.78255e+06	13864532	14152484	6590418	3.96216e+06	4.70049e+06	12942460	7.67548e+06	9346610	1.25657e+06	3321037	5900890	3.63372e+06	3429779	1909343	1.1016e+06	10937713	2.04633e+06	1.89547e+06
2514	uridine 3'-monophosphate (3'-UMP)	Nucleotide	Pyrimidine Metabolism, Uracil containing	39764	LC/MS Neg	106	750	323.029	35170-0-7;35170-03-7	101543	C01368		360423	1538483	1.14689e+06		494233				1.00284e+06		810877			791321	269589			1.50838e+06	703480	8616800	18570544	3.10038e+06		1.62516e+06	5864172	3.17852e+06	5943705	619490	1.6505e+06	2.93085e+06		1.85601e+06	10369820		1.10016e+06
2511	uridine 5'-diphosphate (UDP)	Nucleotide	Pyrimidine Metabolism, Uracil containing	5345	LC/MS Neg	870	599.5	402.995	21931-53-3	6031	C00015	HMDB00295				35571.5								1.02032e+06	316090			775054	2.39807e+06	119356													155718		578409	133081		1372551	1.9944e+06
2512	uridine 5'-monophosphate (UMP)	Nucleotide	Pyrimidine Metabolism, Uracil containing	2856	LC/MS Polar	869	4150	323.029	3387-36-8	6030	C00105	HMDB00288								42535.9	155034		86136.5	483833	962525	57207.1		1.18605e+06	1.94812e+06	579245		98101.1	209136		146810	787863		286612					673676	623533	3.11267e+06	667142	86991.1	1173263	1929145
2510	uridine 5'-triphosphate (UTP)	Nucleotide	Pyrimidine Metabolism, Uracil containing	33448	LC/MS Neg	871	572	482.961	19817-92-6	6133	C00075	HMDB00285												509510	509510			1.12769e+06	1942188	179720																		461648	585279
2516	uridine-2',3'-cyclic monophosphate	Nucleotide	Pyrimidine Metabolism, Uracil containing	37137	LC/MS Neg	75	1090	305.018	40632-52-8	439715	C02355	HMDB11640	210906	612555	449452	723403	988731	180185	653174	403554	1.3338e+06	255851	1086958	2.22088e+06	63796.8	65269.7	194662	724918	357382	1.53304e+06	254444	1.23228e+06	865974	778126	190680	638386	956298	1.76046e+06	710984	149170	312962	559988	501965	710984	1.8861e+06		2.05143e+06	417287
1003	valerate	Lipid	Short Chain Fatty Acid	33443	LC/MS Neg	1136	1718	101.061	109-52-4	7991	C00803	HMDB00892			684052			671240	2.08079e+06					696864	671134														661398	296339			3.96518e+06
1231	valerylcarnitine	Lipid	Fatty Acid Metabolism(Acyl Carnitine)	34406	LC/MS Pos	100001394	2555	246.17		6426903		HMDB13128	2.35294e+06	1892715	6374479	2733670	3.95837e+06	47404048	3.65648e+06	1.81973e+06	5810906	2027706		1.53455e+06	18488650		1.10401e+06	23851412	8440756	6.04149e+06	1.43611e+06	1.01777e+06	2.21897e+06	1.18959e+06	724365	3975266	5.7907e+06	5.14268e+06	2.21596e+06	1.32878e+06			1.88967e+06	1.63953e+06	9892176	1.85743e+06	812815	2342856	2142478
278	valine	Amino Acid	Leucine, Isoleucine and Valine Metabolism	1649	LC/MS Pos	566	1042.1	118.086	72-18-4	6287	C00183	HMDB00883	1067528448	1462596864	1550944384	873138688	1374551424	970914368	844858304	1701366144	1647134720	1268983168	1715457536	618718464	784900288	299650752	815900544	994400896	374924032	1034875456	683500480	2382894592	2786820608	2053086592	1419863424	1573252352	1808477312	1658426240	2933800704	2735041792	2480158976	2531903744	1351593088	1340996352	1542712064	1652890496	2117072256	1131269248	1551345536
734	valylglutamine	Peptide	Dipeptide	42079	LC/MS Pos	100003640	1100	246.145	42854-54-6	5253209						215280	1275381	1603503			402176				995596		512079	541845		2.03733e+06	243665	1262297	13404638	1.88411e+06	2.54557e+06	4117171	3895573	1693177	2.33392e+06	2.20881e+06	811112	645741	1.65618e+06	4422746	12941883	4.21623e+06	1.73018e+06	1.20002e+06	1.27152e+06
735	valylglycine	Peptide	Dipeptide	40475	LC/MS Pos	100003641	1372	175.108	686-43-1	136487			67777.8	899849	749243	2.82921e+06	4404461	11249129	626013	164600	3.02758e+06	1.23053e+06	623224	259040	2699509	362669	2.20472e+06	951990	557893	8437230	627650	6.50141e+06	123035696	29633878	3.76371e+06	36937416	10137150	5.28183e+06	5197548	3.8302e+06	1.9213e+06	1.36973e+06	3.26956e+06	29337916	24320616	10236764	3.8038e+06	3550523	4543697
738	valylleucine	Peptide	Dipeptide	39994	LC/MS Pos	100003210	2562	231.17	22906-55-4	352039				169069	726440	986812	3290304	2.53529e+06	979823		1.78922e+06	825501			4293772	388195	3.54399e+06	1.08973e+06	1.02501e+06	5.44526e+06	1554822	3.41311e+06	14565855	5119029	3478549	16440849	4.12378e+06	6.13629e+06	2750079	4408841	1133938	1.69066e+06	7.1195e+06	20254716	62948736	7.65975e+06	4.25829e+06	3279958	7074053
2431	xanthine	Nucleotide	Purine Metabolism, (Hypo)Xanthine/Inosine containing	3147	LC/MS Neg	1004	908.9	151.026	69-89-6	1188	C00385	HMDB00292	311436448	241177040	441212064	134690768	296883648	142941520	172151280	261408224	248247856	356730112	271943168	92847256	161761760	124803904	167449232	135295312	118601504	253787648	218334288	413110080	400714432	548150400	316805600	281403328	474843680	392792192	641941184	252760752	813454720	479560704	167115616	254814528	148968560	356946752	101973856	206677984	267840288
2433	xanthosine	Nucleotide	Purine Metabolism, (Hypo)Xanthine/Inosine containing	15136	LC/MS Pos	100000299	1827	285.083	146-80-5	64959	C01762	HMDB00299	2.5765e+06	6.12768e+06	8915507	2.84075e+06	8.22638e+06	5.33418e+06	4850177	10376806	10804130	11518075	6.40883e+06	3.71389e+06	3.74798e+06	7.28292e+06	5.2702e+06	8.25185e+06	2.97303e+06	5.858e+06	31355450	11273563	7702257	14098861	21107324	6691292	34264168	22351506	21830520	71514280	20546826	11290420	10760142	7353039	5.49411e+06	10716153	34937332	7667922	5.61884e+06
838	xylitol	Carbohydrate	Pentose Metabolism	4966	GC/MS	543	1677.6	307.2	87-99-0	6912	C00379	HMDB02917	27849.2	48199	83012.1	71349.9	112778	188598	53422.7	82023.5	121752	79605.2	74202.5	47933.1	117657	55484.7	67698.3	56393.5	78111.3	146645	97456.1	173565	205270	301728	86811.5	719172	171095	238709	126872	125661	184822	152814	114985	509214	384662	202902	268805	210730	173824
836	xylonate	Carbohydrate	Pentose Metabolism	35638	GC/MS	100001627	1722	292	73686-31-7	6602431	C05411	HMDB60256	119047	92171.7	88679.9	45337.7	59510.7	76288.9	62011.5	91588.1	54221.5	175834	55143	51282.3	87890.9		101680	52504.8	34859.3		50951.5	106609	158325	115697	90119.8	128739	72164.2	75046.7	98016.8	147515	88883.1	120085	75739.1	167123	178522	94871.4	177256	48733.4	68428.8
837	xylose	Carbohydrate	Pentose Metabolism	15835	GC/MS	826	1723.9	204	609-06-3	135191	C00181	HMDB00098	33152.3	73759.9	139323	121321	325547	138441		185362	226596	265708	155340	195410	217601	163958	219538			179447	53100.2	120306	66740.8	147672	75568	274822	206880	177871	131955	151319	143449	139021	154825	325336		165474	216672	125771	149496
834	xylulose	Carbohydrate	Pentose Metabolism	18344	GC/MS	100000421	1668	306.1	551-84-8	5289590	C00310	HMDB00654	36714.6	17850.8	57812.3	57561	107240	29522.6	39827.2	64626	58707.1	49378.6	24050.3	35759.8	32862.5	38989.6	32085.4	22616.6	22393.4	51372.8	71547	131786	55167.9	43069.1	33029.6	70950.2	24195.6	38994.1	47470.9	25319.5	41961.6	85382.9	27776.7	24542	102521	24851	33870.7	40854.2
[truncated: 20 more columns]

## Sheet: ScaledImpData
												SAMPLE NAME	MICH-00330	MICH-00331	MICH-00332	MICH-00333	MICH-00334	MICH-00335	MICH-00336	MICH-00337	MICH-00338	MICH-00339	MICH-00340	MICH-00341	MICH-00342	MICH-00343	MICH-00344	MICH-00345	MICH-00346	MICH-00347	MICH-00348	MICH-00349	MICH-00350	MICH-00351	MICH-00352	MICH-00353	MICH-00354	MICH-00355	MICH-00356	MICH-00357	MICH-00358	MICH-00359	MICH-00360	MICH-00361	MICH-00362	MICH-00363	MICH-00364	MICH-00365	MICH-00366
												CLIENT IDENTIFIER	A1	A2	A3	A4	A5	A6	A7	A8	A9	A10	A11	A12	A13	A14	A15	A16	A17	A18	A19	B1	B2	B3	B4	B5	B6	B7	B8	B9	B10	B11	B12	B13	B14	B15	B16	B17	B18
												SAMPLE ID	2368936	2368976	2368937	2368977	2368938	2368978	2368939	2368979	2368940	2368980	2368941	2368981	2368942	2368983	2368943	2368984	2368945	2368985	2368946	2368947	2368986	2368948	2368987	2368949	2368988	2368950	2368989	2368951	2368990	2368952	2368992	2368954	2368993	2368955	2368994	2368956	2368995
												PARENT SAMPLE ID	2289403	2289404	2289405	2289406	2289407	2289408	2289409	2289410	2289411	2289412	2289413	2289414	2289415	2289416	2289417	2289418	2289419	2289420	2289421	2289422	2289423	2289424	2289425	2289426	2289427	2289428	2289429	2289430	2289431	2289432	2289433	2289434	2289435	2289436	2289437	2289438	2289439
												LC COLUMN	1	1	2	2	1	1	2	2	1	1	2	2	1	2	2	1	2	2	1	2	1	1	2	2	1	1	2	2	1	1	1	1	2	2	1	1	2
												MATCHED PAIRING	1	2	3	4	5	6	7	8	9	10	11	12	13	14	15	16	17	18	19	1	2	3	4	5	6	7	8	9	10	11	12	13	14	15	16	17	18
												RUN DAY	1	2	1	2	1	2	1	2	1	2	1	2	1	2	1	2	1	2	1	1	2	1	2	1	2	1	2	1	2	1	2	1	2	1	2	1	2
												EMPTY TUBE WEIGHT MG	2130	2100	2110	2110	2110	2130	2130	2110	2120	2130	2110	2120	2120	2130	2140	2130	2130	2120	2130	2130	2130	2110	2120	2120	2120	2110	2120	2110	2090	2120	2120	2090	2120	2120	2130	2110	2130
												SAMPLE WEIGHT MG	45.4	44.2	45	43.2	43.7	44.2	42.5	43.8	48.9	48.3	44.6	42.7	43	49.7	44.8	49.7	45.2	45.7	47.2	36.2	43.6	42	43.8	41	43.3	46.8	42.6	45.5	46.1	44.5	49.1	49.4	47.3	50.5	44.5	48.2	50.2
												GROUP	A	A	A	A	A	A	A	A	A	A	A	A	A	A	A	A	A	A	A	B	B	B	B	B	B	B	B	B	B	B	B	B	B	B	B	B	B
												GROUP DESCRIPTION	Benign	Benign	Benign	Benign	Benign	Benign	Benign	Benign	Benign	Benign	Benign	Benign	Benign	Benign	Benign	Benign	Benign	Benign	Benign	Indolent	Indolent	Indolent	Indolent	Indolent	Indolent	Indolent	Indolent	Indolent	Indolent	Indolent	Indolent	Indolent	Indolent	Indolent	Indolent	Indolent	Indolent
PATHWAY SORTORDER	BIOCHEMICAL	SUPER PATHWAY	SUB PATHWAY	COMP ID	PLATFORM	CHEMICAL ID	RI	MASS	CAS	PUBCHEM	KEGG	Group HMDB	Control	Control	Control	Control	Control	Control	Control	Control	Control	Control	Control	Control	Control	Control	Control	Control	Control	Control	Control	Primary	Primary	Primary	Primary	Primary	Primary	Primary	Primary	Primary	Primary	Primary	Primary	Primary	Primary	Primary	Primary	Primary	Primary
1432	1,2-dipalmitoyl-GPC (16:0/16:0)	Lipid	Phospholipid Metabolism	19130	LC/MS Polar	100000657	830	778.56	63-89-8	452110		HMDB00564	0.8386	1.0468	0.8641	0.5256	0.9099	0.3878	0.604	1	0.5574	0.5528	0.6151	1.0622	0.4929	0.4084	0.48	0.4178	0.384	0.5707	0.9723	1.2997	1.0929	0.828	1.0099	1.4171	0.8894	0.9826	1.4179	1.4135	1.3279	1.1592	0.8491	0.9916	2.0512	0.8901	0.9764	1.0784	0.9243
3415	1,2-propanediol	Xenobiotics	Chemical	38002	GC/MS	100001176	1041	117	57-55-6	1030	C00583	HMDB01881	0.7268	0.9218	0.9476	0.8603	1.0097	2.6701	1.0034	3.5786	2.7369	1	1.0087	1.3228	1.3548	0.6349	0.961	6.4095	4.0961	0.9627	0.7489	0.7181	0.9909	0.9075	0.5641	1.305	2.5647	0.9217	2.8675	1.7987	0.8393	0.9966	1.1445	1.0492	0.77	1.0554	5.286	3.7229	1.047
2743	1,3,7-trimethylurate	Xenobiotics	Xanthine Metabolism	34404	LC/MS Neg	100001397	1985	209.068	5415-44-1	79437	C16361	HMDB02123	1	1	1	1	1	1	1	1	1	1	1	1	1	1	1	1	1	1	1	1	1	1	1	1	1	1	1	1	1	1	1	1	1	1	1	1	1
2740	1,3-dimethylurate	Xenobiotics	Xanthine Metabolism	32391	LC/MS Neg	100001106	1671.4	195.052	944-73-0	70346		HMDB01857	1	1	1	1	1	1	1	1	1	1	1	1	1	1	1	1	1	1	1	1	1	1	1	1	1	1	1	1	1	1	1	1	1	1	1	1	1
793	1,5-anhydroglucitol (1,5-AG)	Carbohydrate	Glycolysis, Gluconeogenesis, and Pyruvate Metabolism	20675	LC/MS Neg	100000580	802	163.061	154-58-5	64960	C07326	HMDB02712	0.9471	1.4332	1.1465	1.2513	0.8068	1	1.2646	0.9087	1.044	1.1091	1.075	1.7405	0.8493	0.6652	1.0943	0.6953	1.0739	1.2102	0.6281	0.956	1.1798	1.078	0.9897	0.8008	0.9911	1.2601	0.775	0.7262	1.3144	1.1018	1.5607	0.7682	0.4746	1.0623	0.5919	0.8262	0.8933
2741	1,7-dimethylurate	Xenobiotics	Xanthine Metabolism	34400	LC/MS Neg	100001399	1578.6	195.052	33868-03-0	91611	C16356	HMDB11103	1	1	1	1	1	1	1	1	1	1	1	1	1	1	1	1	1	1	1	1	1	1	1	1	1	1	1	1	1	1	1	1	1	1	1	1	1
1506	1-(1-enyl-oleoyl)-GPE (P-18:1)*	Lipid	Lysolipid	44621	LC/MS Neg	100005372	6250	462.299					1.1017	1.0173	1.1823	0.9819	1.1236	1.7765	1.3498	0.6716	0.5269	7.1821	0.499	1.3764	0.8673	0.7248	0.7842	0.9426	0.3235	1.5615	0.5531	0.7718	1.5843	1.3999	0.8512	2.8231	2.7397	0.85	0.6033	0.7488	0.8945	1.0907	2.7561	1.7253	1.8161	0.7076	1.9146	0.8057	0.7305
1460	1-(1-enyl-palmitoyl)-GPC (P-16:0)*	Lipid	Phospholipid Metabolism	52474	LC/MS Neg	100002875	6300	554.346		10917802			1.1942	0.5546	1.1253	1.1652	6.8887	9.1901	1.9334	0.0574	1.4229	1.275	1.9785	0.8437	6.435	0.0659	0.0535	1.5259	0.2699	3.1652	0.0535	0.4436	4.3122	1.2422	0.7482	0.7913	2.5904	1.2149	0.5551	2.1222	0.7331	0.6485	11.3283	1.2291	0.4534	0.4499	1.1368	0.7711	0.0535
1504	1-(1-enyl-palmitoyl)-GPE (P-16:0)*	Lipid	Lysolipid	39270	LC/MS Neg	100003000	6285	436.283					0.6407	0.8073	1.0189	0.6398	1.2589	1.5603	1.3027	0.639	0.8137	2.5576	0.7131	0.7722	0.8816	0.2871	0.6012	0.5823	0.4412	1.8496	0.2495	1.3509	1.6202	1.4761	0.8599	3.3117	1.4853	0.7213	1	2.4203	1.0038	0.7602	1.7062	1.6264	2.631	0.821	1.3647	1.1207	0.9318
1452	1-(1-enyl-stearoyl)-2-arachidonoyl-GPE (P-18:0/20:4)*	Lipid	Phospholipid Metabolism	52475	LC/MS Polar	100008999	753	750.544					1.0049	1.7843	1.1769	1.152	1.0523	0.9579	1.2676	1.1603	0.9805	0.9075	0.9936	2.3592	0.9919	0.5496	0.6685	0.8838	0.7047	0.6813	1.0518	1.2709	1.3451	1.2813	0.7789	1.0012	1.2605	1.0309	0.8539	0.9988	1.3327	0.8872	1	0.7475	1.55	1.0749	0.8976	0.8572	0.3607
1505	1-(1-enyl-stearoyl)-GPE (P-18:0)*	Lipid	Lysolipid	39271	LC/MS Neg	100003001	6500	464.315					1.0587	0.7236	1.7403	0.9854	1.7348	1.4017	1.9024	0.9123	1.0785	1.5846	0.6933	0.7061	1.4886	0.4792	0.4685	0.3668	0.2388	1.0012	0.8424	0.7402	1.9062	2.1788	1	1.3791	1.4561	1.265	0.8565	0.6252	0.9089	0.9413	1.7196	1.2142	1.5357	0.9021	1.0402	0.8963	0.4543
1493	1-arachidonoyl-GPC (20:4)*	Lipid	Lysolipid	34061	LC/MS Neg	100001551	6074	618.341			C05208	HMDB10395	0.6111	0.5825	0.7525	1	1.0982	0.8472	0.7447	0.8799	0.592	1.5545	0.6597	0.4232	0.8867	0.2661	0.3983	0.6879	0.6315	0.7416	0.3286	1.6218	5.9245	1.1393	1.7354	1.2039	3.8457	0.9591	3.8455	1.4476	1.4049	1.617	0.9963	2.4024	2.1464	1.4908	2.5208	0.8744	0.3174
1522	1-arachidonoyl-GPE (20:4)*	Lipid	Lysolipid	35186	LC/MS Neg	100001571	5874	500.278		42607465		HMDB11517	0.9324	0.8682	1.0878	0.8409	1.111	0.8349	1.1374	0.7155	0.813	1.0662	0.9769	1.0708	0.7504	0.4916	0.7563	0.6655	0.6522	0.7864	0.7067	1.2526	2.2326	0.8224	1.1667	1.2236	1.7805	0.8639	1.3811	1.1666	1.4884	1.2503	0.7698	1.452	1.3762	0.998	1.3683	0.976	0.523
1543	1-arachidonoyl-GPI (20:4)*	Lipid	Lysolipid	34214	LC/MS Neg	100001654	5482	619.289				HMDB61690	0.3191	0.239	0.642	0.601	1.5587	0.7125	0.5325	0.3142	0.4648	0.8077	0.3669	0.279	0.5556	0.1346	0.7562	0.3372	0.317	1	0.8143	1.0384	2.3458	0.9426	1.7508	1.1302	1.9732	1.5523	1.7123	1.3318	1.0849	1.8283	0.7624	1.3852	1.6062	1.6429	1.6103	0.6257	0.6442
1615	1-arachidonylglycerol (20:4)	Lipid	Monoacylglycerol	34397	LC/MS Neg	100001433	6450	303.233	35474-99-8	5282281	C13857	HMDB11572	0.1107	0.6258	0.2845	0.4344	0.3332	0.2677	0.1813	0.9767	0.1787	1.7952	0.1107	0.42	0.368	0.477	0.1113	0.8527	0.1449	0.6318	0.7844	0.7779	7.0952	1	2.1496	0.9615	5.3342	1.3164	1.3016	1.4028	3.4137	1.6976	1.902	3.4181	3.2561	0.8275	1	2.0336	0.2558
1622	1-dihomo-linolenylglycerol (alpha, gamma)	Lipid	Monoacylglycerol	48341	LC/MS Neg	100006121	6220	305.249					0.4931	0.629	0.5247	0.3472	0.2684	0.2674	0.24	0.9257	0.2429	1.3047	0.2197	0.831	0.1458	0.3976	0.5524	0.4997	0.3825	0.674	0.3104	2.0696	5.6734	0.6233	3.158	2.4122	2.7066	1.0048	1.3928	7.7569	3.8996	0.6527	1.4809	1.4028	3.7667	1.8145	0.6992	1.6357	0.7433
1620	1-docosahexaenoylglycerol (22:6)	Lipid	Monoacylglycerol	35153	LC/MS Neg	100001481	6150	309.222				HMDB11587	0.206	0.5157	0.3337	0.5355	0.2016	0.2413	0.0554	0.5407	0.1071	1.4013	0.1098	0.1752	0.1919	0.1858	0.1698	0.5066	0.1393	0.6768	0.7918	0.8248	15.0281	1.0524	2.0854	0.9319	2.8563	0.9476	1.3292	1.6807	1.5403	1.1993	0.7783	2.6049	4.6339	0.866	1.4226	1.1081	0.4469
1481	1-linoleoyl-GPC (18:2)	Lipid	Lysolipid	34419	LC/MS Pos	100001395	5575.9	520.34		11988421	C04100	HMDB10386	1	2.4534	0.4097	0.7347	0.787	0.2363	1.1656	0.8214	0.6669	0.7017	0.9268	1.5257	0.338	0.7351	2.3222	0.8294	0.788	1.2515	0.5324	0.4009	1.6289	1.294	1.2214	2.3877	1.2368	0.7885	2.1209	0.7862	1.01	1.6173	0.5307	2.5705	3.2356	1.2433	6.108	1.2924	0.3895
1518	1-linoleoyl-GPE (18:2)*	Lipid	Lysolipid	32635	LC/MS Neg	100001570	5900	476.278		52925130		HMDB11507	1.1412	1.1048	1.0379	0.549	1.0912	1	1.9887	0.7769	1.0808	1.5992	0.9621	1.23	0.726	0.6284	1.4414	0.664	0.5694	1.8899	0.5478	0.8076	1.9601	1.2016	0.94	1.7655	1.3865	0.5559	0.9716	0.4719	0.6723	1.3313	0.5627	1.9459	2.3036	0.5644	4.9007	1.0551	1.6513
1539	1-linoleoyl-GPI (18:2)*	Lipid	Lysolipid	36594	LC/MS Neg	100001778	5494	595.289					0.5656	0.25	0.7738	0.356	1.3204	0.7805	0.7414	0.3229	1.0352	2.5229	0.5343	0.4239	0.401	0.1156	2.5389	0.7372	0.3616	1.8113	0.8079	0.7003	1.4711	1.506	1.0067	1.9447	1.5264	1.0638	0.9302	0.9627	0.5554	2.2167	0.7436	2.215	1.5979	0.9648	7.1175	0.5325	2.2417
1612	1-linoleoylglycerol (18:2)	Lipid	Monoacylglycerol	27447	LC/MS Neg	100001040	6477	279.233	2277-28-3	5283469			0.3121	0.5947	0.3199	0.5237	0.352	0.3428	0.2299	1	0.1917	2.3766	0.2532	0.4172	0.396	0.4012	0.3556	0.6817	0.2705	1.3093	0.7968	1.1931	3.8305	0.8821	1.3986	2.1014	1.5796	0.9336	1.0035	0.8799	1.5471	1.6376	0.797	2.6467	3.5475	0.5686	1.2623	1.3763	0.7345
1548	1-linoleoylglycerophosphoserine*	Lipid	Lysolipid	43676	LC/MS Neg	100004606	5500	520.268					0.1072	0.2339	0.1072	0.1072	0.7383	0.5464	0.3792	0.3626	0.1072	1.6677	0.2114	0.305	0.1072	0.1072	0.7565	0.5967	0.1072	1.1542	0.3865	0.4421	2.8255	1	1.0619	3.5273	1.9134	0.7227	1.733	0.7229	0.8269	3.0935	0.7508	3.2578	4.1127	0.5514	6.3823	1.5657	2.1451
66	1-methylhistamine	Amino Acid	Histidine Metabolism	43831	LC/MS Pos	100001204	585.5	126.103	501-75-7	3614	C05127	HMDB00898	0.238	0.5383	1.0199	1.3757	1.7245	0.2522	0.825	0.413	1.0279	1	0.9801	0.6401	0.7149	0.5945	1.6733	0.7308	0.5694	1.4995	0.4126	4.1791	2.042	0.9778	3.5293	0.7057	2.9143	2.2857	4.0272	4.8828	3.2997	1.2515	0.2948	0.3775	0.0457	2.7642	0.4002	0.5468	0.1673
55	1-methylhistidine	Amino Acid	Histidine Metabolism	30460	LC/MS Neg	100001051	1227	168.078	332-80-9	92105	C01152	HMDB00001	0.2681	0.2681	0.2681	0.5561	0.8108	0.3524	0.4215	0.2681	0.4924	0.2681	0.5536	0.4083	1.2325	0.2681	0.2681	0.4867	0.2681	0.2681	0.2681	0.886	1.8105	1.7998	1.2801	2.1392	1.2027	1.2127	1	0.7056	0.6817	1.1	0.8335	2.3345	1.5952	0.582	2.7656	1.516	2.8937
70	1-methylimidazoleacetate	Amino Acid	Histidine Metabolism	32350	LC/MS Pos	100001208	833	141.066	2625-49-2	75810	C05828	HMDB02820	6.9584	6.5452	3.4593	3.646	6.0445	0.5732	1.9781	5.8788	3.1456	3.0033	2.2989	2.8787	1.9182	3.3317	1.1085	0.3796	0.1854	1	0.7048	1.1054	1.0594	0.343	1.1992	0.5917	0.7319	1.0692	0.525	5.0441	1.2655	0.6057	0.5609	0.3625	0.3292	0.8156	0.2983	0.1562	0.3794
2581	1-methylnicotinamide	Cofactors and Vitamins	Nicotinate and Nicotinamide Metabolism	27665	LC/MS Pos	55	691.3	137.071	1005-24-9	10129985	C02918	HMDB00699	0.0896	0.2041	0.2083	0.1775	0.8994	0.681	0.3705	0.5333	0.2427	0.1944	0.2461	0.2277	0.4533	0.4653	0.2197	0.1007	0.1402	0.8212	1.0228	1.087	0.9824	1.1029	1.172	1.9696	1.3899	1.0529	1	1.2634	1.6963	0.788	0.3877	2.0928	2.3971	1.0479	1.4606	0.8958	0.7373
2738	1-methylurate	Xenobiotics	Xanthine Metabolism	34395	LC/MS Pos	100001400	1860.5	183.051	708-79-2	69726	C16359	HMDB03099	1	1	1	1	1	1	1	1	1	1	1	1	1	1	1	1	1	1	1	1	1	1	1	1	1	1	1	1	1	1	1	1	1	1	1	1	1
1601	1-myristoylglycerol (14:0)	Lipid	Monoacylglycerol	35625	LC/MS Neg	100001618	6353.3	227.202	75685-84-6	79050	C01885	HMDB11561	0.3675	0.8742	0.8123	0.7721	0.5222	0.6372	0.6774	0.5409	0.619	1.1077	0.4233	0.815	0.4608	0.4572	0.6548	0.4418	0.5823	0.7445	0.5033	2.1785	4.518	0.9896	1.0657	1.6325	1	1.0104	1.151	3.2332	1.5757	0.9229	1.1676	0.8623	1.6721	1.3503	0.7014	0.7125	0.3914
1478	1-oleoyl-GPC (18:1)	Lipid	Lysolipid	48258	LC/MS Pos	100001272	5700	522.355	19420-56-5	16081932		HMDB02815	0.6556	1.4157	0.3877	0.3521	0.7062	0.2776	0.7614	0.6447	0.5158	0.3098	0.4916	1.2038	0.2643	0.7613	1.7782	0.5306	0.5807	1	0.5548	0.558	1.9636	1.9582	0.9576	4.9556	1.3572	1.4351	1.4123	1.498	1.1591	0.9376	1.0346	3.3086	5.5389	1.2784	3.3971	1.0819	0.3635
1514	1-oleoyl-GPE (18:1)	Lipid	Lysolipid	35628	LC/MS Neg	100001569	6125.1	478.294	89576-29-4	9547071		HMDB11506	1.6078	0.8396	1.9628	0.5883	1.1375	0.7342	2.6038	0.7648	0.5181	1.2256	0.7206	1.0279	1.0282	1.0391	1.9639	0.3032	0.5753	1.5421	0.9463	1.0008	1.6899	0.9992	0.8473	2.3976	2.0964	0.6083	0.8338	0.9142	1.0281	1.2046	0.9136	1.9682	1.5656	0.7244	2.0859	0.5696	1.0943
1561	1-oleoyl-GPG (18:1)*	Lipid	Lysolipid	45968	LC/MS Neg	100005716	5610	509.288					0.4968	0.5699	0.672	0.3143	1.4068	0.5663	0.931	0.7689	0.9332	1.714	1.0734	0.4855	0.4771	0.1665	0.6155	0.4348	0.3711	1.0034	0.6271	1.0627	1.7627	0.8522	0.9768	1.5509	1.184	1.6983	1.0678	0.9963	1.3938	1.2956	1.3324	1.4371	2.1154	0.9343	1.0343	0.6487	0.7502
1537	1-oleoyl-GPI (18:1)*	Lipid	Lysolipid	36602	LC/MS Neg	100001777	5599	597.305					0.3779	0.2666	0.5427	0.2247	0.942	0.3847	0.6155	0.1941	0.5408	1.1232	0.4498	0.3477	0.3638	0.2187	0.7487	0.3073	0.2582	0.801	0.4237	0.9767	1.6552	1.4754	1	2.0848	1.8513	1.0233	0.7824	1.3849	1.0536	1.1628	1.03	1.4327	1.7129	1.5953	2.7188	0.5085	1.1582
1546	1-oleoyl-GPS (18:1)	Lipid	Lysolipid	19260	LC/MS Neg	100000630	5607	522.284		9547099			0.0486	0.2428	0.0486	0.2928	0.489	0.2234	0.6125	0.3721	0.6153	0.4852	0.5281	1.1868	0.3361	0.1973	0.4328	0.4829	0.164	0.5567	0.5613	0.8546	1.641	1.3956	0.9072	1.8734	3.0491	0.9498	1.0657	1.7801	1	1.7378	1.4677	2.2493	1.6832	0.9177	2.3382	0.8712	0.8839
1610	1-oleoylglycerol (18:1)	Lipid	Monoacylglycerol	21184	LC/MS Pos	100000924	5820.4	374.326	111-03-5	5283468		HMDB11567	0.4327	0.5512	0.4027	0.6197	0.6994	0.4961	0.4764	0.7617	0.4208	0.7866	0.3665	1.2189	0.4808	0.4892	0.4919	0.9026	0.3996	1.0674	0.6755	1.0141	4.2055	1.5261	1.3745	3.7407	1.3849	1.3438	1.3261	2.4012	2.3436	0.8114	1.2504	1.5811	5.2865	0.8422	1	1.1288	0.4501
1472	1-palmitoleoyl-GPC (16:1)*	Lipid	Lysolipid	47117	LC/MS Neg	100001511	5794	568.326		24779461		HMDB10383	0.5077	0.4143	0.459	0.2792	0.5766	0.7397	0.5232	0.2699	0.4223	0.6277	0.4809	0.4677	0.3093	0.202	0.5724	0.5454	0.5671	0.6487	0.2038	1.3703	3.2728	1.3112	1.1846	3.317	1.7771	0.6376	1.1535	3.2225	1.0004	1.3213	1.5009	2.2335	2.0751	0.8162	4.9768	1.672	3.0815
1625	1-palmitoleoylglycerol (16:1)*	Lipid	Monoacylglycerol	52431	LC/MS Neg	100008952	6094	253.217					0.4597	0.9712	0.3422	0.2224	0.42	0.6545	0.2944	0.2141	0.2968	1.0025	0.3335	0.557	0.3354	0.091	0.1228	0.7632	0.3863	0.65	0.2995	2.4077	10.4429	0.9956	1.3126	1.9836	1.5858	1.0044	0.7364	6.436	1.7388	1.652	2.3492	2.0085	2.0018	0.9303	0.9166	1.5769	0.9175
1435	1-palmitoyl-2-arachidonoyl-GPC (16:0/20:4)*	Lipid	Phospholipid Metabolism	52459	LC/MS Polar	100008914	870	826.56	35418-58-7	10747814			1.9124	1.1883	1.7849	0.995	1.2242	0.7069	1.1569	1.8762	1.177	1.3274	1.0711	0.9753	0.9615	1.2242	1.0487	0.912	0.9059	0.8829	0.991	1.6527	1.6253	0.5101	1.2879	0.7193	1.6194	0.6376	2.3938	1.3583	1.1612	1.4845	0.6378	0.9549	0.6765	1.1079	0.8612	0.9688	0.46
1461	1-palmitoyl-2-arachidonoyl-GPE (16:0/20:4)*	Lipid	Phospholipid Metabolism	52464	LC/MS Polar	100008990	758	738.508					2.0536	1.9927	2.0525	0.7267	0.833	0.2413	1.0335	1.7232	0.7288	0.9912	0.5993	1.4281	0.2413	0.9981	1.3183	0.6593	0.5472	0.6665	0.7478	1.7112	1.8415	0.648	1	1.0758	0.9084	0.7162	1.996	1.8052	0.8252	1.0789	0.4308	0.8442	2.152	0.7175	1.1587	1.1704	0.6388
1446	1-palmitoyl-2-arachidonoyl-GPI (16:0/20:4)*	Lipid	Phospholipid Metabolism	52467	LC/MS Polar	100008993	892	857.519					3.6479	1.5453	2.8903	0.6178	1.0461	0.2295	0.7153	1.5907	0.7493	1.6414	0.8547	1.2481	0.3241	1.1564	1.3915	0.559	0.3611	0.5788	0.8913	0.976	0.8268	1.044	0.9201	0.5527	1	1.2612	1.5097	1.1939	1.0317	1.1543	0.9003	1.2557	1.1464	0.5677	0.6627	1.8269	0.6595
1439	1-palmitoyl-2-palmitoleoyl-GPC (16:0/16:1)*	Lipid	Phospholipid Metabolism	52470	LC/MS Polar	100008984	872	776.545					0.7862	1.0404	0.5821	0.6043	0.9847	0.5806	0.3539	0.4496	1.1209	0.4222	0.7049	0.936	0.4219	0.3226	0.4194	0.6504	0.5661	0.5441	0.2994	1.5929	1.2865	0.8525	1.2293	1.5215	0.9277	0.8818	0.8601	3.3946	1.0385	1.609	2.1061	1.1513	1.5316	0.7047	1	2.3598	2.0926
1470	1-palmitoyl-GPC (16:0)	Lipid	Lysolipid	33955	LC/MS Pos	100001263	5670	496.34	17364-16-8	86554		HMDB10382	1.5408	2.0888	1.0956	0.7436	0.7629	0.6335	0.8939	0.937	0.7474	1	0.713	2.0184	0.3345	1.6949	3.3207	0.8161	0.9436	1.2868	0.593	0.5009	1.4194	1.3268	1.1164	3.4394	2.2036	1.2285	1.9574	2.6544	1.3658	0.8032	0.7008	2.4378	4.7323	1.0256	1.3525	1.1924	0.2148
1509	1-palmitoyl-GPE (16:0)	Lipid	Lysolipid	35631	LC/MS Neg	100001567	6057.2	452.278		9547069		HMDB11503	3.6438	1.5383	3.8675	0.8597	1.137	0.7305	3.1979	1.2173	0.8396	2.3599	0.8234	0.7753	0.9452	1.7515	3.3316	0.348	0.4704	1.5451	1.0163	0.9389	1.2418	0.97	0.9387	2.411	1.362	0.8393	1.1431	2.0981	0.863	1.265	0.6736	2.0961	1.5947	0.6072	1.2103	1.0442	0.7332
1556	1-palmitoyl-GPG (16:0)*	Lipid	Lysolipid	45970	LC/MS Neg	100005717	5570	483.273		3300276			0.6903	0.716	0.9659	0.9167	1.5242	1.3352	1.6155	0.9109	1.2245	1.2869	0.7329	0.5265	1.0639	0.5095	0.5066	0.8136	0.5545	2.5344	0.5776	0.9888	2.0211	1.0112	0.9442	2.9175	1.3928	1.1141	1.1153	1.3338	1.1108	1.1201	1.1156	1.8487	2.4358	0.6301	1.42	2.7273	1.0918
1532	1-palmitoyl-GPI (16:0)*	Lipid	Lysolipid	35305	LC/MS Neg	100001655	5564	571.289				HMDB61695	1.0552	0.402	1.5758	0.1663	0.5561	0.222	0.4204	0.358	0.5125	2.9013	0.4174	0.2466	0.229	0.2827	1.0798	0.4205	0.193	0.4164	0.2658	1.0205	0.9074	2.3515	0.6723	2.3624	1.7957	1.3872	1.1014	3.7422	1.3761	0.7719	0.5445	1.7998	1.5969	0.7613	2.1863	1.3417	1
1558	1-palmitoyl-GPS (16:0)*	Lipid	Lysolipid	46130	LC/MS Neg	100005805	5572	496.268		9547100			0.446	0.6124	0.446	0.446	0.7019	0.446	2.194	1.5332	0.6677	0.446	0.446	0.9784	0.446	0.446	0.446	0.446	0.446	0.9119	0.446	0.446	2.4247	0.446	1.0094	2.7406	2.0717	0.8171	0.9906	0.7892	0.9555	1.457	2.1525	1.8256	0.446	0.446	2.2932	0.446	0.6905
1605	1-palmitoylglycerol (16:0)	Lipid	Monoacylglycerol	21127	LC/MS Neg	100000827	6400	255.233	542-44-9	14900		HMDB31074	0.3843	0.5069	0.5532	0.4226	0.466	0.5767	0.2596	0.7464	0.2663	1.3038	0.2623	0.3321	0.423	0.257	0.4526	0.4054	0.344	0.591	0.4125	1.8489	6.452	1.4024	1	1.4568	1.3533	0.7772	1.4793	2.2533	1.9619	1.1113	0.6718	0.8859	1.18	0.9317	0.4714	0.4721	0.257
1430	1-stearoyl-2-arachidonoyl-GPC (18:0/20:4)	Lipid	Phospholipid Metabolism	42450	LC/MS Polar	100001869	850	854.591	35418-59-8	16219824			1.1886	1.1887	1.117	0.7615	0.612	0.4833	1.2309	0.9227	0.9628	0.6919	1.0238	1.0729	0.389	0.9509	0.7031	0.5684	0.7077	0.605	1.4698	1.5633	1.3259	0.5753	1.2531	0.9422	1.244	1.4913	1.1598	1.0991	1.6064	1.3217	0.7868	1.0432	0.437	1.4265	0.7429	0.5846	0.3251
1457	1-stearoyl-2-arachidonoyl-GPE (18:0/20:4)*	Lipid	Phospholipid Metabolism	52447	LC/MS Polar	100008977	756	766.539					1.0521	1.3449	1.0548	0.9327	0.8097	0.9268	0.8578	1.0177	0.4997	0.5726	0.6558	1.1574	0.9858	0.4894	0.5871	1.0413	0.9645	0.6391	0.835	1.8103	1.9991	0.7542	0.9018	1.0304	1.1593	1.0782	1.2466	1.06	1.6671	1.2112	0.8968	0.8279	1.7525	1.0833	0.8588	0.9797	0.2359
1443	1-stearoyl-2-arachidonoyl-GPI (18:0/20:4)*	Lipid	Phospholipid Metabolism	52449	LC/MS Polar	100000616	870	885.549					1.6711	1.1279	1.3234	1.0142	1.0504	0.7135	0.6626	1.3536	0.5532	0.6195	0.9137	1.3159	1.0113	0.7582	0.7298	0.702	0.7868	0.5106	1.2768	1.4106	1.1165	0.9328	0.9402	0.4845	0.9743	1.4533	1.4468	0.7976	0.99	1.6904	1.0166	0.9017	1.3742	0.9691	0.6981	1.0034	0.3511
1433	1-stearoyl-2-oleoyl-GPC (18:0/18:1)	Lipid	Phospholipid Metabolism	52438	LC/MS Polar	100008904	830	832.607	56421-10-4				0.8841	0.9245	0.7592	0.5723	0.9657	0.4915	0.8944	0.7032	0.5685	0.7814	0.8481	1.0742	0.8202	0.7286	0.8003	0.5711	0.7837	0.7319	1.8313	1.0134	1.0755	1.9801	0.8616	1.6788	0.7737	1.4033	0.6781	0.7029	1.1457	0.7895	1.0566	1.2864	2.0522	1.0617	0.837	1.3038	1.1699
1459	1-stearoyl-2-oleoyl-GPE (18:0/18:1)	Lipid	Phospholipid Metabolism	42448	LC/MS Polar	100001856	750	744.555					0.4039	0.7937	0.5739	0.2648	0.5144	0.2648	0.7545	0.7308	0.5509	0.4391	0.2648	1.1584	0.2648	0.2648	0.8269	0.2648	0.3901	0.4155	0.8246	1.3241	1.7292	2.7359	0.6074	1.5997	0.3817	0.9162	0.6665	0.6148	0.7361	1.0124	1.396	0.7946	4.116	1.0473	1.2341	1.0254	1.0018
1476	1-stearoyl-GPC (18:0)	Lipid	Lysolipid	33961	LC/MS Pos	100001271	5847	524.371	19420-57-6	497299		HMDB10384	1.2349	2.5555	1.0255	1	0.7041	0.6835	0.9633	0.9401	0.8015	0.9806	0.8706	1.974	0.3126	1.8659	2.28	0.7083	0.7254	1.3591	0.6327	0.6005	2.1715	1.692	1.6937	4.5056	2.7591	1.2649	1.6264	2.0064	2.4683	0.9006	0.9188	2.3588	7.2803	1.3165	1.43	1.1134	0.1187
1512	1-stearoyl-GPE (18:0)	Lipid	Lysolipid	42398	LC/MS Neg	100001461	6514	480.31	69747-55-3	9547068		HMDB11130	2.7718	1.0389	3.471	2.2484	2.9105	2.6554	4.3697	1.5517	0.8917	0.9806	1.1824	0.541	3.1827	0.9414	0.6001	0.4637	0.7256	1.6773	0.6738	0.8404	1.9305	1.0479	0.679	1.7715	1.1188	0.8694	0.6527	0.8942	1.3289	1.3813	0.4933	2.3769	1.0922	0.9793	0.8005	0.9284	0.3221
1559	1-stearoyl-GPG (18:0)	Lipid	Lysolipid	34437	LC/MS Neg	100001462	5816	511.304					0.3936	0.8292	0.9949	0.6329	1.8298	1	2.3471	0.6032	2.375	1.5294	0.7246	0.4034	0.8955	0.2533	0.4328	0.5896	0.3321	2.6783	0.7745	1.4008	2.7201	1.5958	0.9882	1.8689	1.6372	1.5275	0.8193	0.9851	2.0144	1.2671	1.3172	1.6444	3.3513	0.914	0.9967	0.9981	0.4682
1535	1-stearoyl-GPI (18:0)	Lipid	Lysolipid	19324	LC/MS Neg	100000656	5794.3	599.32	796963-93-4			HMDB61696	0.7248	0.2974	1.4118	0.241	0.8064	0.592	0.5797	0.4162	0.5478	1.234	0.5912	0.1252	0.5225	0.1805	0.7943	0.2183	0.3258	0.3553	0.6347	1.6391	1.879	2.719	0.8406	1.5576	1.3999	1.4804	1.2121	2.4662	2.0653	1.2646	0.5233	1.1938	1.2481	1.6326	1.6994	0.845	0.502
1545	1-stearoyl-GPS (18:0)*	Lipid	Lysolipid	45966	LC/MS Neg	100004327	5800	524.299		9547101			0.6378	0.5585	1.0378	0.4595	1.0082	0.5385	2.1177	0.9408	0.6513	0.6692	0.9218	0.4385	0.8536	0.3332	0.5566	0.1864	0.2534	0.7849	0.8291	1.4625	2.6964	1.7965	0.7503	1.5705	1.4661	1.2108	1.1099	1.7302	1.9342	1.6363	0.8108	1.3809	1.7619	0.8974	1.1574	0.744	0.7023
1608	1-stearoylglycerol (18:0)	Lipid	Monoacylglycerol	21188	GC/MS	100000932	2186.6	399.4	123-94-4;31566-31-1	24699	D01947	HMDB31075	0.3568	0.6926	0.8862	0.5689	0.5587	0.5192	0.4168	1.0293	0.335	1	0.2993	0.4844	0.3374	0.5085	0.4325	0.2646	0.3312	0.3639	0.4231	1.2753	1.7399	1.222	0.7876	1.2249	0.8809	1.0191	1.1094	1.6172	1.393	1.1136	0.6669	1.1323	1.169	0.9726	0.9242	1.1293	0.7061
1021	10-heptadecenoate (17:1n7)	Lipid	Long Chain Fatty Acid	33971	LC/MS Neg	100001278	5555	267.233	29743-97-3	5312435		HMDB60038	1.0479	0.9794	1.1601	0.7851	0.6466	0.7839	0.5354	0.8306	0.9759	1.393	1.088	0.8346	0.4621	0.317	0.5364	1.0355	0.3908	0.9038	0.5005	3.5457	2.857	1.8624	0.9453	1.1922	1.0421	0.7013	1.2507	0.796	2.731	1.5357	0.6758	1.0241	1.5656	0.6815	1	0.356	0.7491
1031	10-nonadecenoate (19:1n9)	Lipid	Long Chain Fatty Acid	33972	LC/MS Neg	100001277	5780	295.264	73033-09-7	5312513		HMDB13622	0.7251	0.5525	0.8748	0.5326	0.653	0.588	0.4163	0.8322	0.4911	1.5213	0.6625	0.4271	0.4003	0.2562	0.3811	0.4125	0.21	0.5772	0.6812	3.6555	4.6962	2.5998	1.0376	1.535	1.3081	0.8856	1.4829	0.7981	3.4254	1.3564	0.9548	1.0947	2.006	1.0328	1	0.2295	0.548
1284	13-HODE + 9-HODE	Lipid	Fatty Acid, Monohydroxy	37752	LC/MS Neg	100002196	5275	295.228		43013			1.308	1.436	4.546	1.4113	1.0005	0.679	2.7901	2.5465	3.6128	1.1297	2.2049	1.309	0.659	0.9909	8.6938	5.3195	0.5293	2.6163	1.5664	1.8866	0.9407	0.7057	0.6415	0.6464	1	2.29	1.9408	1.1216	1.2049	6.157	0.9147	0.5446	0.4268	0.341	1.3752	0.3887	0.8671
1118	15-methylpalmitate (isobar with 2-methylpalmitate)	Lipid	Fatty Acid, Branched	38768	LC/MS Neg	100002945	5695	269.249		17903417			1.1778	0.9903	0.2668	0.8621	0.8443	0.6941	0.7914	0.6461	1.5354	1.4563	0.5374	0.7709	0.4994	0.3544	0.6968	1.3629	0.6142	0.7505	0.8722	2.696	3.2388	1.8829	0.7803	0.8104	1.2833	1.2985	0.696	0.9753	1.2139	1.1816	1.4524	0.9457	1.9394	1.2721	1.021	0.549	0.5518
1767	16a-hydroxy DHEA 3-sulfate	Lipid	Steroid	38168	LC/MS Neg	100002126	4240	383.153					0.1203	2.2751	1.2421	0.2837	3.1504	2.6706	0.2904	1.3789	0.1203	0.8485	0.1203	0.5968	3.7876	0.465	0.1513	1.8478	0.2555	2.0632	0.2924	0.1203	0.1203	0.1203	0.1203	1.2116	2.2157	0.1203	0.1203	0.1203	1.0111	0.1203	0.1203	1.0033	0.1203	0.1203	0.7594	0.1203	0.1203
1121	17-methylstearate	Lipid	Fatty Acid, Branched	38296	LC/MS Neg	100002356	5993	297.28	2724-59-6	3083779			0.5621	0.826	0.7243	0.5088	0.5475	0.3323	0.4039	0.4732	0.7961	1.2153	0.7856	0.4744	0.2496	0.3603	0.3707	1.7103	0.3718	0.4735	1.1233	1.9737	5.4369	2.0731	0.6788	0.7878	1.0975	1.4776	0.7311	1.0144	1.9223	0.9672	2.7067	0.6966	2.2944	1.512	1.2631	0.5744	0.6501
2501	2'-deoxyguanosine	Nucleotide	Purine Metabolism, Guanine containing	1411	LC/MS Neg	348	1751	266.089	961-07-9	187790	C00330	HMDB00085	0.14	0.4959	0.4375	0.14	1.1645	0.4318	0.14	0.6058	0.6244	0.14	0.4807	0.434	0.7527	0.14	0.4595	0.14	0.14	0.7768	0.3689	2.2738	2.8341	0.455	1.0249	0.7879	1.2238	1.1889	1.0592	5.8933	0.5245	1.4486	0.7991	0.982	6.416	1.2871	1.3299	0.8768	0.6895
2436	2'-deoxyinosine	Nucleotide	Purine Metabolism, (Hypo)Xanthine/Inosine containing	15076	LC/MS Neg	100000135	1688	251.079	890-38-0	65058	C05512	HMDB00071	0.1835	0.348	0.3227	0.4206	1.5261	0.7068	0.2457	0.4237	0.3715	0.2424	0.4294	0.3127	0.7535	0.3521	1.0082	0.1446	0.2125	0.8716	0.5688	2.6849	4.9458	1.1136	1.7083	0.9418	1.4976	1.32	0.826	3.569	0.324	0.6645	1	0.9604	8.2238	1.9412	1.6699	0.7644	1.2914
79	2-aminoadipate	Amino Acid	Lysine Metabolism	6146	LC/MS Pos	381	793.3	162.076	542-32-5;1118-90-7	469	C00956	HMDB00510	0.6476	1.0211	0.8877	1.0346	5.954	0.401	3.6552	2.3046	6.2069	1.9223	4.5351	2.1831	2.8491	0.4753	1.7897	5.4134	0.9506	2.4319	0.6465	0.7352	0.8208	1.4416	0.7552	1.2763	1.198	1.9745	0.8517	1.0011	1.1873	1.7556	0.4652	0.9743	1	2.1294	0.7942	0.8797	1.1204
305	2-aminobutyrate	Amino Acid	Methionine, Cysteine, SAM and Taurine Metabolism	42374	LC/MS Polar	1128	2451.5	102.056	1492-24-6	439691	C02261	HMDB00650	0.4468	0.6486	0.7471	0.4297	0.9949	0.9189	0.6514	0.7094	1.383	0.4147	0.6525	0.3149	0.8399	0.1002	0.7656	1.6489	0.8694	1.4668	0.1002	0.7623	1.4485	1.0878	1.2993	1.2798	1.3319	1.9934	1.7089	1.6746	0.5638	1.376	0.7512	1.027	0.1792	1.6379	2.4153	2.3419	3.3067
1185	2-aminoheptanoate	Lipid	Fatty Acid, Amino	43761	LC/MS Pos	100004542	2530	146.118	1115-90-8	227939			0.0822	0.0982	0.2848	0.0822	1.2462	0.6168	0.0822	0.0822	0.3055	0.3952	0.103	0.0822	0.8249	0.1367	0.0822	0.9042	0.3402	1.3485	0.0822	0.9787	2.9692	1.5564	0.8852	2.2611	2.1315	1.0213	2.5275	0.7493	0.7633	0.83	1	2.7368	7.4142	2.8657	2.8494	1.3484	2.0722
1190	2-aminooctanoate	Lipid	Fatty Acid, Amino	43343	LC/MS Pos	100004227	3355	160.133	644-90-6	69522		HMDB00991	0.1218	0.1218	0.1218	0.7672	0.5551	0.6263	0.682	0.1218	0.5185	0.1218	1.0414	1.0881	0.4499	0.1218	0.6791	0.7868	1	0.1218	0.1218	0.4212	1.2434	2.5185	0.9473	0.9039	1.0527	1.1762	0.6198	0.1218	0.1218	1.151	2.2385	0.7863	2.4419	0.6368	0.9473	1.4268	0.8015
3442	2-aminophenol sulfate	Xenobiotics	Chemical	43266	LC/MS Neg	100004322	1677	188.002		181670		HMDB61116	0.4911	1.0443	0.4911	0.7412	0.4911	0.4911	0.4911	0.4911	0.4911	0.4911	0.4911	0.4911	0.9584	1.6545	0.9615	0.4911	0.4911	0.4911	1.6907	0.4911	0.4911	0.4911	0.6297	0.4911	0.4911	0.4911	0.4911	0.4911	0.4911	0.4911	0.4911	0.4911	0.4911	0.4911	0.4911	0.4911	0.4911
1616	2-arachidonoylglycerol (20:4)	Lipid	Monoacylglycerol	19266	LC/MS Neg	100000584	6170	303.233	53847-30-6	5282280	C13856	HMDB04666	0.2634	0.9353	0.3792	0.174	0.6783	0.3934	0.2647	0.4286	0.4129	1.8067	0.174	0.3194	0.8718	0.174	0.174	1.1759	0.4169	0.2147	0.7178	0.7185	4.8732	0.9566	1	1.4595	3.7953	1.67	0.5793	1.252	2.034	1.1836	1.262	4.272	4.0937	1.2066	0.9269	4.2732	0.3184
275	2-hydroxy-3-methylvalerate	Amino Acid	Leucine, Isoleucine and Valine Metabolism	36746	LC/MS Neg	100001541	1800	131.071	488-15-3	164623		HMDB00317	0.3192	0.3389	0.9327	0.592	1.9019	2.1237	0.782	0.8329	2.6213	0.333	1.7268	0.7368	1.5462	2.3382	1.0937	1.9875	0.8032	1	1.6701	0.321	2.0137	0.9626	0.6946	4.4719	2.29	0.8771	0.8484	3.2511	0.8622	0.5678	1.4698	0.9312	2.5397	2.0482	1.6123	3.2628	20.6396
3155	2-hydroxyacetaminophen sulfate*	Xenobiotics	Drug	33173	LC/MS Neg	100001791	1674	246.008					0.6801	0.6801	0.6801	0.6801	0.6801	0.6801	0.6801	0.6801	0.6801	0.6801	0.6801	0.6801	0.6801	0.6801	0.6801	0.6801	1.3199	0.6801	0.6801	0.6801	0.6801	0.6801	0.6801	0.6801	0.6801	0.6801	0.6801	0.6801	0.6801	0.6801	0.6801	0.6801	0.6801	0.6801	0.6801	0.6801	0.6801
306	2-hydroxybutyrate (AHB)	Amino Acid	Methionine, Cysteine, SAM and Taurine Metabolism	21044	LC/MS Polar	100000933	1258	103.04	3347-90-8	440864	C05984	HMDB00008	0.6216	1	0.4438	0.8249	1.7872	1.5835	0.7641	1.0822	1.3656	0.4849	0.8876	1.0915	1.7135	0.4513	1.1139	1.8998	0.9281	1.641	0.5002	0.6035	0.9869	0.7251	0.9944	1.3888	1.8563	1.3367	0.9238	0.9749	0.5455	1.2815	2.5114	1.5235	0.5447	1.526	2.0621	2.9087	1.77
1132	2-hydroxyglutarate	Lipid	Fatty Acid, Dicarboxylate	37253	LC/MS Neg	100002070	600	147.03	40951-21-1	43	C02630	HMDB00606	0.6584	0.6188	0.9945	0.4838	0.9763	0.7327	0.618	0.7061	0.7462	1.0933	0.5348	0.579	1.3395	1.2826	1.0533	0.9232	0.7036	0.7995	1.0113	1.0829	1.2205	0.78	0.6612	1.0055	1.0437	0.8597	1	1.113	0.4455	1.1601	1.6317	0.8274	2.4084	1.1148	1.4897	2.4345	2.6577
1257	2-hydroxyoctanoate	Lipid	Fatty Acid, Monohydroxy	22036	LC/MS Neg	100000743	3736.8	159.103	617-73-2	94180		HMDB02264	0.4742	8.1907	2.1236	1.0405	1.226	1	1.1222	0.4742	0.4742	0.4742	1.2838	0.4742	1	0.7771	0.5891	0.6057	0.6749	0.4742	0.7116	1.8219	2.4208	0.6761	0.4742	0.6323	0.4742	1.6472	0.4742	0.4742	0.5158	0.4742	0.8689	0.4742	0.4742	0.4742	0.4742	0.4742	0.4742
1260	2-hydroxypalmitate	Lipid	Fatty Acid, Monohydroxy	35675	LC/MS Neg	100001579	5511.2	271.228	764-67-0	92836		HMDB31057	0.7557	0.736	0.9373	0.472	0.961	0.3892	0.8864	1.1362	0.5235	1.4478	0.7807	0.6869	0.4872	0.4935	0.7283	1.7645	0.5962	1.5502	0.9984	1.0065	0.4407	1.104	0.7961	1.3729	0.8865	2.5965	0.8184	2.8994	1.8698	0.7173	1.0565	0.8004	0.3834	0.9266	0.7371	1.5232	2.0526
1613	2-linoleoylglycerol (18:2)	Lipid	Monoacylglycerol	32506	LC/MS Neg	100000987	6250	279.233	3443-82-1	5365676		HMDB11538	0.4726	0.5492	0.5244	0.1905	0.7616	0.6249	0.2822	0.4428	0.3403	2.2948	0.2492	0.2338	0.9719	0.2644	0.2768	1.3343	0.3484	0.7854	0.9937	0.9296	3.0279	1.0063	0.749	2.7416	1.6222	1.5267	0.6781	0.5859	1	1.653	1.0053	4.7987	6.135	0.5982	1.537	3.3199	0.9098
3156	2-methoxyacetaminophen sulfate*	Xenobiotics	Drug	47031	LC/MS Neg	100001793	1949	260.023					0.5993	0.5993	0.5993	0.5993	0.5993	0.5993	0.5993	0.5993	0.5993	0.5993	0.5993	0.5993	0.5993	0.5993	0.5993	0.5993	1.4007	0.5993	0.5993	0.5993	0.5993	0.5993	0.5993	0.5993	0.5993	0.5993	0.5993	0.5993	0.5993	0.5993	0.5993	0.5993	0.5993	0.5993	0.5993	0.5993	0.5993
270	2-methylbutyrylcarnitine (C5)	Amino Acid	Leucine, Isoleucine and Valine Metabolism	45095	LC/MS Pos	100001509	2465	246.17	31023-25-3	6426901		HMDB00378	0.6333	0.475	1.0162	1.0287	1.5426	2.4847	0.6437	0.3971	1.2994	0.6902	1.0764	0.95	2.672	0.59	0.7008	2.4223	0.7428	1.8713	1.0404	0.7083	1	0.3628	0.4258	1.1454	1.0436	1.8161	0.8561	0.4166	1.0128	3.8018	0.9358	1.143	2.2864	0.9838	1.6237	0.745	2.0332
996	2-methylcitrate	Energy	TCA Cycle	37483	LC/MS Neg	90	575	205.035	6061-96-7	439681	C02225	HMDB00379	0.3277	0.8048	0.4585	0.5797	1.133	0.6634	0.9944	0.6109	0.6745	0.6628	0.7987	1	1.0784	0.6855	0.8791	3.2707	0.7133	0.9462	0.565	0.8499	1.5889	0.8046	0.7897	1.2029	1.3253	2.2026	2.7514	1.0136	0.9648	1.1344	0.9981	0.8487	8.5124	0.7906	5.6064	0.7497	1.8058
1611	2-oleoylglycerol (18:1)	Lipid	Monoacylglycerol	21232	LC/MS Neg	100000943	6950	281.249	3443-84-3	5319879			0.1435	0.3412	0.2461	0.2182	0.4734	0.6981	0.1085	0.4027	0.1685	0.9294	0.1171	0.1997	0.5145	0.2291	0.2033	0.6929	0.4546	0.7511	0.4241	1.0978	5.2101	0.8382	1.2981	3.5752	1.9371	0.9421	1	1.3184	1.6512	0.4796	1.446	1.9668	6.981	1.0579	1.0096	1.5578	1.0536
1473	2-palmitoleoyl-GPC (16:1)*	Lipid	Lysolipid	35819	LC/MS Pos	100001561	5490	494.324					0.2974	0.8853	0.2974	0.457	0.4843	0.2974	0.2974	0.2974	0.3948	0.2974	0.4813	1.2336	0.2974	0.2974	0.3791	0.6195	0.9732	0.5824	0.2974	0.7478	0.9725	0.9467	1.1038	2.3154	0.7928	0.6362	1.0275	3.5789	0.3801	0.4699	2.4343	1.7178	3.294	0.9677	3.0597	2.1576	1.6348
1626	2-palmitoleoylglycerol (16:1)*	Lipid	Monoacylglycerol	52432	LC/MS Neg	100008953	6016	253.217					0.4497	0.779	0.6695	0.1562	0.7594	1.2532	0.2209	0.1742	0.6148	1	0.7448	0.5239	0.8352	0.3704	0.1527	1.1614	0.8583	1.0341	0.1527	1.4926	0.1527	0.6188	0.8373	3.1798	1.5285	0.9541	1.4986	0.1527	0.3153	1.0459	1.7751	2.3403	5.7079	0.9137	0.5972	2.2033	1.4559
1471	2-palmitoyl-GPC (16:0)*	Lipid	Lysolipid	35253	LC/MS Pos	100001562	5610	496.34		15061532		HMDB61702	0.9142	2.4744	0.4799	0.4874	0.6328	0.2808	0.5643	0.8445	0.4206	0.4793	0.6111	2.135	0.0967	0.9663	1.7194	0.7206	0.6629	0.8123	0.5597	0.5283	1.6912	1.1429	1.2107	2.578	1.9384	1.1247	2.0678	1.5344	1.5573	0.8994	1.0575	2.2113	8.6934	1.2376	3.7763	0.9063	0.4802
1606	2-palmitoylglycerol (16:0)	Lipid	Monoacylglycerol	33419	LC/MS Neg	100001048	6628.9	255.233	23470-00-0	123409		HMDB11533	0.182	0.3461	0.2624	0.4639	0.4618	0.9362	0.1759	0.7609	0.1225	0.808	0.1359	0.2457	0.563	0.2764	0.3216	0.7859	0.437	1	0.3742	1.8463	9.6841	1.2852	1.8036	2.0799	2.0887	0.9091	2.1795	1.7185	2.1238	0.7059	0.9817	1.0799	5.2986	1.2403	0.7561	0.4228	0.6212
809	2-phosphoglycerate	Carbohydrate	Glycolysis, Gluconeogenesis, and Pyruvate Metabolism	35629	GC/MS	100000093	1734	459.1	70195-25-4	59	C00631	HMDB03391	0.9263	2.9697	2.0555	2.9417	0.8827	1.8441	1.0737	3.0096	3.4208	1.3447	2.8479	0.7995	3.5542	0.2224	0.539	2.8976	2.2849	1.1384	0.3478	1.7834	0.3276	1.9756	0.093	0.9191	1.1437	1.2721	0.6534	2.4289	2.5087	0.6836	0.093	0.6141	0.093	0.7569	0.668	0.2133	0.1911
2760	2-piperidinone	Xenobiotics	Food Component/Plant	43400	LC/MS Pos	100004295	2047	100.076	675-20-7	12665			1	1	1	1	1	1	1	1	1	1	1	1	1	1	1	1	1	1	1	1	1	1	1	1	1	1	1	1	1	1	1	1	1	1	1	1	1
1513	2-stearoyl-GPE (18:0)*	Lipid	Lysolipid	41220	LC/MS Neg	100003901	6350	480.31					2.3867	1	2.4231	1.7318	1.8053	2.0189	3.2897	0.7848	0.6023	5.0615	0.9475	0.6069	1.1248	1.0168	0.5452	0.6183	0.6492	1.7129	1.4984	0.6354	1.0583	1.2648	0.5976	1.4948	1.2861	1.0656	0.6006	0.9158	1.2311	1.8764	0.5966	2.1009	0.897	0.5869	1.8047	1.1082	0.2304
2597	3'-dephosphocoenzyme A	Cofactors and Vitamins	Pantothenate and CoA Metabolism	18289	LC/MS Neg	100000138	2013	686.142	3633-59-8	444485	C00882	HMDB01373	0.1917	0.1917	0.1917	0.1917	0.3209	0.623	0.1917	0.1917	0.1917	0.1917	0.1917	0.1917	0.7707	0.1917	0.1917	0.8158	0.8867	0.1917	0.1917	0.1917	0.1917	0.1917	0.1917	1.751	0.1917	0.1917	0.1917	0.1917	0.1917	0.1917	0.8344	1.5582	6.11	0.5602	1.2395	2.4764	4.1398
121	3-(4-hydroxyphenyl)lactate	Amino Acid	Phenylalanine and Tyrosine Metabolism	32197	LC/MS Neg	240	1379	181.051	6482-98-0	9378	C03672	HMDB00755	0.2727	1	0.7698	0.6243	1.0824	0.9036	0.6597	0.8238	1.2085	0.6326	1.0753	0.5335	1.0142	0.6489	0.4951	1.2133	0.6765	0.6549	0.6757	1.2826	0.8705	0.8125	0.7893	0.7966	1.0292	1.3273	2.3762	5.7557	5.5837	1.7184	1.2186	0.878	0.7433	0.8931	1.3125	0.5496	0.655
172	3-(4-hydroxyphenyl)propionate	Amino Acid	Phenylalanine and Tyrosine Metabolism	39587	LC/MS Neg	100002914	1670	165.056	501-97-3	10394	C01744	HMDB02199	0.112	0.112	3.3563	0.7374	0.7143	0.6869	0.244	0.5787	3.252	0.112	1.2242	0.112	0.7968	0.112	1	12.325	0.2687	1.6041	0.112	0.5471	0.112	1.6469	0.112	11.7596	0.9427	0.112	1.0573	3.3261	0.112	0.112	2.069	1.1575	0.112	0.1585	1.058	0.112	2.5901
2563	3-aminoisobutyrate	Nucleotide	Pyrimidine Metabolism, Thymine containing	1566	GC/MS	1114	1252.2	102	10569-72-9;214139-20-5	64956	C05145	HMDB03911	0.1736	1.6431	0.5188	1.0438	1.919	0.4645	0.8539	0.5167	2.3103	0.2975	0.7628	2.0653	1.073	0.2221	0.2546	2.2206	0.927	1.2022	0.161	0.3945	1	1.6087	0.8802	4.6074	1.3398	2.3568	5.2863	0.4366	0.5731	1.6517	0.6001	4.0793	0.6771	0.4555	2.1975	5.6638	2.6891
1154	3-carboxy-4-methyl-5-propyl-2-furanpropanoate (CMPF)	Lipid	Fatty Acid, Dicarboxylate	31787	LC/MS Neg	100001178	2840	239.092	86879-39-2	123979		HMDB61112	1.0862	4.0578	1.7943	8.3204	4	0.1906	0.5584	1.8005	1.4944	0.3921	2.0649	0.3897	3.3716	0.8347	1.6429	1.7378	0.8094	4.5937	1.0492	1.0687	1.0349	0.6678	5.1421	1.5002	0.1982	0.2352	0.7009	0.4013	0.4481	0.7559	0.1153	1.3386	0.455	1.1771	1.1758	0.3537	1.7184
276	3-hydroxy-2-ethylpropionate	Amino Acid	Leucine, Isoleucine and Valine Metabolism	32397	LC/MS Neg	100001170	975	117.056	4374-62-3	188979		HMDB00396	0.5996	0.998	0.8555	1	1.9815	1.5396	0.9894	0.4934	1.407	0.8521	1.1342	1.1912	1.5946	0.8789	1.2837	1.0976	0.6952	0.6637	1.2216	0.9283	0.9861	0.6832	1.1099	1.2856	1.8231	1.2066	0.0896	1.296	1.0381	0.9429	0.8358	1.0106	0.6122	1.3592	1.239	0.8185	0.7338
1663	3-hydroxy-3-methylglutarate	Lipid	Mevalonate Metabolism	531	LC/MS Neg	112	621.1	161.046	503-49-1	1662	C03761	HMDB00355	0.1524	0.5658	0.3672	0.4507	0.7026	0.0931	0.5598	0.6426	0.4957	0.3367	0.5039	0.6538	0.4028	0.5474	0.3243	0.9542	0.3451	0.5598	0.6263	1.3693	1.5499	1.05	1.0527	0.9948	0.8879	1.172	1.7761	1.1255	0.9547	1.3789	1.6695	0.9494	1.116	1.224	3.0067	1.2793	1.444
1253	3-hydroxybutyrate (BHBA)	Lipid	Ketone Bodies	542	LC/MS Polar	254	1443.3	103.04	625-72-9	441	C01089	HMDB00357	0.4359	0.1158	0.9544	0.6537	1.2844	1.5166	1.3619	3.4921	0.474	0.1458	0.791	1	1.4723	0.2034	1.3029	1.2096	1.9565	1.4823	0.793	0.5571	0.1617	1.0456	0.7554	3.6066	1.8944	1.357	3.1702	0.3206	0.2195	0.7922	1.1207	2.8358	0.2665	1.8426	1.4338	1.9123	1.1029
1265	3-hydroxydecanoate	Lipid	Fatty Acid, Monohydroxy	22053	LC/MS Neg	100000997	4634.7	187.134	5561-87-5	26612		HMDB02203	0.3157	0.575	0.5279	0.6769	1.6885	0.5892	1.2609	0.9868	0.7372	0.478	0.7474	0.836	0.9774	0.6381	0.6563	0.6466	1.3522	1.1417	3.1608	0.807	0.5365	0.6149	1.0878	0.693	1.0383	1.1317	0.9298	3.2069	1.123	0.6342	1.3546	0.5722	0.5164	1.6604	0.9455	0.7761	1.3268
2863	3-hydroxyindolin-2-one	Xenobiotics	Food Component/Plant	42561	LC/MS Pos	100003823	2645	132.044	61-71-2	6097	C11130		0.9144	0.2594	0.4054	1.2208	1	0.1409	2.4488	1.5146	1.43	0.2754	0.5299	0.1377	1.3046	0.1377	0.8393	0.4691	0.1377	2.1134	0.1377	0.9738	0.1377	0.1377	1.7584	1.4095	0.1377	2.8666	1.4795	1.4829	0.5594	0.6637	0.1377	1.2765	0.185	1.0956	0.4634	0.1377	2.2683
284	3-hydroxyisobutyrate	Amino Acid	Leucine, Isoleucine and Valine Metabolism	1549	LC/MS Polar	111	1619.1	103.04	2068-83-9	87	C06001	HMDB00336	0.5972	1.4348	1.0798	1.5594	2.1535	1.1571	1.4146	1.2096	1.249	0.4333	1.4542	2.3685	1.611	1.3775	2.3478	1.3128	1.6564	1.7801	1.3701	0.4449	0.7462	0.6148	0.8276	1.7279	1.1747	1.2076	1.2343	0.6977	0.4624	1.0111	0.5771	0.7868	0.4681	2.1071	1.1992	0.595	1.0087
1267	3-hydroxylaurate	Lipid	Fatty Acid, Monohydroxy	32457	LC/MS Neg	100001112	5175	215.165	53941-38-1	94216		HMDB00387	0.3026	0.5028	0.5107	0.5158	1.4166	0.6469	1.2639	0.951	0.6379	0.5109	0.6228	0.7395	0.8299	0.5559	0.6522	0.5246	1.195	0.8972	3.8801	1.0239	0.6889	0.8584	1.6302	0.9922	1.0432	0.9975	1.0798	2.67	1	0.7274	1.4154	0.6585	0.5386	2.228	0.7449	0.7507	1.5099
1264	3-hydroxyoctanoate	Lipid	Fatty Acid, Monohydroxy	22001	LC/MS Neg	100000773	3446	159.103	88930-08-9	26613		HMDB01954	0.1991	0.9611	0.5703	0.767	1.7473	0.6611	1.1982	1.26	0.6699	0.6295	0.7439	0.9428	1.0629	0.649	0.7051	0.7157	1.2152	1.7068	2.6762	0.7502	0.5357	0.608	0.823	0.9371	1.082	1.5304	1.036	3.5056	1.3381	0.4891	1	0.598	0.6382	1.677	1.2809	0.8118	2.242
202	3-indoxyl sulfate	Amino Acid	Tryptophan Metabolism	27672	LC/MS Neg	100000467	2222.2	212.002	2642-37-7	10258		HMDB00682	1.5387	2.6314	0.5783	7.1974	2.9629	0.488	5.6318	2.3565	1.9356	2.2404	1.0531	0.7209	2.4787	0.8243	1.1819	0.6389	0.4551	1.5877	0.4556	1.4839	0.8541	0.2848	6.4122	1.2554	0.5025	2.5842	0.8666	0.4412	1.1662	0.3786	0.2482	1.1327	0.4742	0.692	0.4539	0.3204	1.0789
160	3-iodotyrosine	Amino Acid	Phenylalanine and Tyrosine Metabolism	18300	LC/MS Neg	100000456	2056	305.963	70-78-0	439744	C02515	HMDB00021	1	1	1	1	1	1	1	1	1	1	1	1	1	1	1	1	1	1	1	1	1	1	1	1	1	1	1	1	1	1	1	1	1	1	1	1	1
141	3-methoxytyrosine	Amino Acid	Phenylalanine and Tyrosine Metabolism	12017	LC/MS Pos	1342	1771	212.092	300-48-1	1670		HMDB01434	0.2519	0.3876	0.428	0.4997	1.3705	0.2519	0.5557	0.878	0.5952	0.7718	0.4628	0.6069	1.0197	0.2519	0.2718	0.953	0.5422	0.8103	0.2519	1.0573	1.4002	2.4973	0.8895	1.8491	0.9107	1.0344	1.6482	0.6533	1.5839	0.2519	1.0683	1.8861	1.0217	0.7827	1.8384	2.1301	2.834
281	3-methyl-2-oxobutyrate	Amino Acid	Leucine, Isoleucine and Valine Metabolism	44526	LC/MS Neg	100000936	1465	115.04	3715-29-5	49	C00141	HMDB00019	3.7966	0.9853	1.8478	4.2612	8.7639	1.3903	4.2329	3.0323	0.5225	0.4215	1.2847	9.7247	9.3555	8.0797	3.2502	2.266	2.7882	3.4308	1	0.4215	0.8189	0.8322	0.662	0.4953	0.4215	0.4215	0.4215	0.4215	0.4215	0.4215	0.8883	0.4215	0.4215	0.8433	0.8862	0.4215	1.1688
269	3-methyl-2-oxovalerate	Amino Acid	Leucine, Isoleucine and Valine Metabolism	15676	LC/MS Neg	100000036	2064.2	129.056	1460-34-0;51829-07-3	47	C00671	HMDB03736	6.9912	2.2968	2.3681	16.7245	25.1908	2.7624	16.3325	0.9982	3.6804	0.759	1.3835	24.6772	29.1757	18.7929	4.8601	5.4213	4.4288	12.1183	1.9768	0.5173	0.8116	0.9713	0.9413	0.5846	0.9202	0.7034	0.6685	0.5613	0.5551	0.6309	2.5305	0.6721	0.9612	1.013	1.7896	0.6663	3.4348
84	3-methylglutarylcarnitine (1)	Amino Acid	Lysine Metabolism	46547	LC/MS Pos	100005849	1870	290.16		128145		HMDB00552	0.2018	0.6502	0.5416	0.5419	4.2719	2.1249	1.2862	1.0317	1.0418	0.561	0.9016	1.5225	3.8403	12.7266	0.8598	1.3063	0.5586	1.5098	16.483	0.2018	0.2018	0.2018	0.2018	2.9798	1.5362	0.7673	0.2018	0.2018	0.9683	0.2018	0.668	2.354	4.906	1	0.2018	0.2737	0.8318
56	3-methylhistidine	Amino Acid	Histidine Metabolism	15677	LC/MS Neg	100000042	906.3	168.078	368-16-1	64969	C01152	HMDB00479	0.1541	0.5032	0.1421	2.726	1.4093	0.4138	0.8129	0.7665	1.2785	0.4995	1.502	0.7673	1.7243	1.3182	0.383	3.2658	0.2426	0.4348	0.4195	0.2918	0.82	0.5008	4.193	1.7209	0.8172	1.2993	1.7176	1.0266	1.0463	1.8089	0.9803	1.8199	3.9927	0.6697	4.5553	0.6128	1
2745	3-methylxanthine	Xenobiotics	Xanthine Metabolism	32445	LC/MS Neg	100001108	1700	165.042	1076-22-8	70639	C16357	HMDB01886	1	1	1	1	1	1	1	1	1	1	1	1	1	1	1	1	1	1	1	1	1	1	1	1	1	1	1	1	1	1	1	1	1	1	1	1	1
810	3-phosphoglycerate	Carbohydrate	Glycolysis, Gluconeogenesis, and Pyruvate Metabolism	1414	LC/MS Neg	132	583	184.986	80731-10-8	724	C00597	HMDB00807	1.9896	5.4042	2.5629	4.7455	0.8752	1.8163	1.4649	4.0972	4.1704	1.7148	3.1378	2.18	3.0828	0.7037	0.7353	5.4366	2.5792	2.2771	0.4183	1.534	0.4413	1.8623	0.5895	0.7226	1.3555	1.1248	1	2.1747	4.4101	0.6274	0.6566	0.6571	0.0845	0.7558	0.5993	0.2201	0.2689
3160	4-acetamidophenol	Xenobiotics	Drug	12032	LC/MS Neg	1383	2173.7	150.056	103-90-2	1983	C06804	HMDB01859	0.0998	0.0998	0.0998	0.0998	0.0998	0.0998	0.0998	0.3165	0.0998	0.0998	0.0998	0.0998	0.0998	1.3479	0.0998	0.0998	725.969	13.1064	0.9736	0.0998	0.0998	0.0998	0.0998	0.0998	0.0998	0.0998	0.322	0.0998	0.0998	0.0998	0.2725	0.1141	1.1946	0.0998	0.0998	446.406	9.0208
3161	4-acetamidophenylglucuronide	Xenobiotics	Drug	15736	LC/MS Neg	100000043	1400	326.088	120595-80-4	83944		HMDB10316	0.5669	0.5669	0.5669	0.5669	0.5669	0.5669	0.5669	0.5669	0.5669	0.5669	0.5669	0.5669	0.5669	0.5669	0.5669	0.5669	1.4331	0.5669	0.5669	0.5669	0.5669	0.5669	0.5669	0.5669	0.5669	0.5669	0.5669	0.5669	0.5669	0.5669	0.5669	0.5669	0.5669	0.5669	0.5669	0.5669	0.5669
3159	4-acetaminophen sulfate	Xenobiotics	Drug	37475	LC/MS Neg	2049	1792	230.013	10066-90-7;32113-41-0	83939	C06804	HMDB59911	0.0114	0.0114	0.0114	0.0114	0.0114	0.0114	0.0114	0.0114	0.0114	0.0114	0.0114	0.0114	0.0114	0.0114	0.0114	0.0114	1.8794	1.2355	0.0114	0.0114	0.0114	0.0114	0.0114	0.0114	0.0114	0.0114	0.0114	0.0114	0.0114	0.0114	0.0114	0.0114	0.0114	0.0114	0.0114	1	0.7645
1782	4-androsten-3beta,17beta-diol disulfate (1)	Lipid	Steroid	37202	LC/MS Neg	100001992	3740	224.062		10634	C04295	HMDB03818	0.2858	0.6401	4.0134	1	5.8171	4.2307	1.5089	0.7062	0.6774	0.6769	2.6994	1.3281	5.998	2.6997	0.4892	1.8997	1.8028	1.6925	2.2038	0.2698	0.1994	1.1937	0.5962	2.6276	5.237	0.7053	0.3823	0.1523	0.7873	0.9732	0.3908	2.7819	1.0554	0.3987	1.485	0.8759	0.887
1783	4-androsten-3beta,17beta-diol disulfate (2)	Lipid	Steroid	37203	LC/MS Neg	100001994	4065	224.062		10634	C04295	HMDB03818	0.1708	1.3751	1.689	1.5178	8.905	1.0712	2.7098	0.9444	0.5408	0.8863	1.0462	2.0257	10.2233	0.1708	0.1708	1.4619	2.1742	2.0097	0.9034	0.9538	0.1708	0.1708	0.4595	3.7023	1.5841	0.2805	0.3055	0.1708	1.2471	0.1708	0.1708	3.2055	0.1708	0.6387	0.6941	0.4385	0.4219
1773	4-androsten-3beta,17beta-diol monosulfate (1)	Lipid	Steroid	37211	LC/MS Neg	100002028	4547	369.174	521-17-5			HMDB03818	0.555	1.0741	0.2013	1.8818	1.1199	4.3296	1.9764	0.461	0.2013	0.6263	0.2013	1.5792	1.9426	0.4769	4.1115	4.2998	5.9615	1.6985	0.7868	0.2013	0.9851	0.2013	1.3456	0.6328	4.8351	0.8801	0.2013	0.2013	0.4856	0.2013	0.6181	0.879	0.2013	4.0907	2.8696	3.2398	0.6068
2715	4-ethylphenylsulfate	Xenobiotics	Benzoate Metabolism	36099	LC/MS Neg	100001756	3580	201.023	123-07-9		C13637		1.6961	4.0939	2.5617	4.4398	0.3649	1.4851	2.2337	0.3649	2.0087	0.8388	2.6498	1.9226	0.3649	0.8069	0.616	1.2571	1.7297	0.3649	1	1.4191	0.5615	0.3649	1.6661	0.3649	0.9572	0.3649	0.3649	0.3649	0.5821	0.4013	0.3649	0.3649	0.3649	0.3649	0.3649	0.4584	0.3649
375	4-guanidinobutanoate	Amino Acid	Guanidino and Acetamido Metabolism	15681	LC/MS Pos	100000096	1150	146.092	463-003;463-00-3	500	C01035	HMDB03464	1.4484	2.7633	1.75	2.8736	0.7372	0.8983	0.5778	0.4352	2.4581	0.7172	0.8033	1.0336	1.294	1	0.8963	2.7586	1.4043	1.7632	0.6659	1.8827	0.744	0.7736	0.8526	1.1696	0.8405	0.7887	0.7078	0.9146	0.7773	0.5917	1.4693	1.1862	2.4081	0.6931	0.9917	1.582	2.375
2692	4-hydroxybenzoate	Xenobiotics	Benzoate Metabolism	21133	LC/MS Neg	100000862	820	137.024	99-96-7	135	C00156	HMDB00500	0.1412	2.1407	1.9598	1.3801	0.3594	0.1412	1.1651	0.771	1.2759	1.5286	0.8935	0.5906	0.708	0.1412	0.2904	8.3443	1.0257	1.8988	0.1412	2.017	0.8135	0.1412	0.1412	0.6096	0.4445	2.018	1.2352	0.8189	0.6346	1.0467	0.1412	0.1412	0.1412	0.1412	0.1412	0.1412	0.1412
1255	4-hydroxybutyrate (GHB)	Lipid	Fatty Acid, Monohydroxy	34585	LC/MS Pos	100001507	1480	87.0441	502-85-2	10413	C00989	HMDB00710	0.4026	0.3604	1.2392	0.5186	1.7803	4.0411	0.607	0.1875	0.9868	1.6611	0.528	0.1096	1.5539	0.2421	0.4086	1.0201	0.5173	1.5224	0.6397	0.8189	1.1554	2.2281	0.5372	2.3151	2.4128	0.9733	0.6537	0.4016	0.492	1.4526	0.2723	2.5806	1.552	1.0031	1.7554	1.669	1.8596
240	4-methyl-2-oxopentanoate	Amino Acid	Leucine, Isoleucine and Valine Metabolism	22116	LC/MS Neg	100000551	2170	129.056	816-66-0	70	C00233	HMDB00695	6.1993	1.5319	2.1801	8.5607	18.7391	1.2959	11.6442	0.6586	1.0141	0.4782	1.2185	12.3562	21.828	9.6592	3.9685	2.5097	3.1768	6.0042	1.5559	1.7231	1	0.9859	0.6095	0.5336	0.689	0.8871	0.6791	0.8325	0.447	0.7797	1.0837	0.7902	0.8233	0.7794	0.9654	0.6361	0.8846
2705	4-methylcatechol sulfate	Xenobiotics	Benzoate Metabolism	46146	LC/MS Neg	100004111	2665	203.002					1.2505	5.6252	1.5219	16.7559	1.6066	0.4938	3.0451	1.978	0.2617	0.5344	0.2697	0.0345	1.4406	0.0345	0.625	0.0708	0.0419	0.208	0.0345	1.0072	1.6545	0.6048	11.9445	0.7639	0.2874	1.2114	0.6451	0.0345	0.7779	0.0345	0.0345	0.6994	0.0345	0.2904	0.0345	0.0345	0.0345
2716	4-vinylphenol sulfate	Xenobiotics	Benzoate Metabolism	36098	LC/MS Neg	100001755	3320	199.007	2628-17-3	6426766	C05627	HMDB04072	1.2761	2.5527	2.3281	5.0513	0.633	1.6295	0.3041	0.0572	0.4818	0.5008	6.4957	3.3905	1.099	1.8825	2.6294	1.9422	5.0454	0.9899	2.2318	1.3804	0.6379	0.6771	1.4924	0.0572	1.4691	0.1317	0.0572	0.0572	0.0572	0.8828	0.8764	0.0572	0.8321	0.0572	0.1108	2.0948	0.0572
2561	5,6-dihydrothymine	Nucleotide	Pyrimidine Metabolism, Thymine containing	1418	LC/MS Pos	158	1654.2	129.066	696-04-8	93556	C00906	HMDB00079	0.0795	0.4192	0.297	0.3567	1.4433	0.4141	0.345	0.3251	0.4398	0.325	0.2873	0.2838	0.5435	0.3525	0.17	0.2119	0.1633	0.4279	0.7548	1.2894	1.9406	0.986	1.3335	0.5987	2.462	1.1029	0.8501	2.4652	0.5645	0.5631	0.9768	0.508	2.6103	1.3022	2.542	0.9039	1.5813
2527	5,6-dihydrouracil	Nucleotide	Pyrimidine Metabolism, Uracil containing	1559	LC/MS Pos	1125	1148	115.05	504-07-4	649	C00429	HMDB00076	0.0643	0.2666	0.6402	0.1565	1.7124	0.4791	0.5265	0.3132	0.6947	0.9585	0.2882	0.1226	0.9221	0.3026	0.2797	0.2166	0.3045	0.577	0.8997	0.6753	1.325	1.2127	0.5589	1.6725	1.844	1.6955	1.2252	0.7339	1.3227	0.9611	0.2148	1.3566	2.0324	0.9127	1.987	1.3622	1.3479
93	5-aminovalerate	Amino Acid	Lysine Metabolism	18319	LC/MS Pos	100000454	835	118.086	660-88-8	138	C00431	HMDB03355	0.8962	0.4698	1.0955	0.8956	2.2612	0.2693	1.5003	0.6843	1.6794	0.3013	0.917	0.2693	3.2094	0.2693	0.9062	3.6103	1.2487	1.0166	0.2693	2.7332	1.647	1.4394	0.2693	1.23	3.7747	0.5788	3.1202	2.6742	0.4847	0.2693	9.6646	0.9773	0.2693	1.0751	0.7723	1.7562	0.9291
1012	5-dodecenoate (12:1n7)	Lipid	Medium Chain Fatty Acid	33968	LC/MS Neg	100001232	5224	197.155	2430-94-6	5312378		HMDB00529	0.7416	0.6153	0.786	0.77	0.4985	0.6579	0.9774	0.5168	0.5705	0.6625	0.7622	0.8442	0.4791	0.4603	0.5192	0.4819	0.3894	0.6398	1.059	2.3452	1.9215	0.8722	1.3259	0.8932	0.997	1.0262	1.2497	3.1565	1.4064	1.2258	2.264	0.6034	1.1049	0.9165	0.6201	0.5052	0.9386
1272	5-hydroxyhexanoate	Lipid	Fatty Acid, Monohydroxy	31938	LC/MS Neg	100001148	1267	131.071	44843-89-2	170748		HMDB00525	0.7415	1.1298	1	0.5081	1.3016	0.8982	0.8909	1.0299	1.1822	0.3356	1.5866	0.745	1.0226	3.2315	0.8962	1.0212	1.1059	0.862	2.6546	1.0653	0.3356	0.3356	0.5845	0.7952	1.4383	0.9995	1.4268	0.5855	0.806	0.7123	0.5912	0.9927	2.2641	0.686	1.3374	0.7994	0.3356
2554	5-methyl-2'-deoxycytidine	Nucleotide	Pyrimidine Metabolism, Cytidine containing	38159	LC/MS Pos	100002300	1481	242.114	838-07-3	440055	C03592	HMDB02224	0.6237	0.8378	0.9606	0.6462	0.9174	0.4633	0.7713	1.1184	1.0648	2.3539	1.2937	0.5134	0.4858	0.2211	0.6135	0.4208	0.2214	0.7774	0.6174	1.3353	1.2234	1.3288	0.9959	0.9677	1.0871	1.1478	1.3899	1.466	1.5287	1.6374	0.6909	0.9979	1	0.9689	1.1436	0.7831	0.8974
366	5-methylthioadenosine (MTA)	Amino Acid	Polyamine Metabolism	1419	LC/MS Pos	212	2444.9	298.097	2457-80-9	439176	C00170	HMDB01173	0.0297	0.0297	0.0297	0.424	0.4139	0.4619	0.1369	0.0442	0.0297	0.3365	0.0297	0.4926	0.5602	0.1272	0.2659	1.259	0.3918	0.6866	0.035	1.4274	3.7196	1.748	3.1521	2.7889	0.4914	0.4682	0.3343	0.3587	0.0806	0.0297	2.0982	2.05	9.3239	1.5231	3.6727	2.3784	5.9724
2520	5-methyluridine (ribothymidine)	Nucleotide	Pyrimidine Metabolism, Uracil containing	35136	LC/MS Neg	100001446	1778.1	257.078	1463-10-1	445408		HMDB00884	0.9392	1.5707	1.0208	0.8912	1.6247	0.7533	0.6112	1.6717	3.3802	0.594	2.2376	1	0.3089	0.939	0.4248	0.6428	0.7613	1.2279	1.4524	6.4321	2.5423	0.5596	2.4877	0.3312	1.1321	1.5834	0.6488	10.1134	0.773	0.8007	2.2415	0.2516	0.9277	2.0045	0.73	1.4793	0.5294
385	5-oxoproline	Amino Acid	Glutathione Metabolism	1494	LC/MS Neg	1021	738.5	128.035	98-79-3	7405	C01879	HMDB00267	1.5096	1.704	1.5585	0.7071	0.8119	0.5301	0.5902	2.2764	1.62	1.8898	1.8963	0.5301	0.5546	0.303	0.5848	0.631	0.4331	0.6768	0.4518	1.3683	1.6649	1.4057	1.0808	0.6106	1.3578	1.0777	2.0704	2.9915	2.7364	2.4225	0.6642	0.6144	1.0523	0.9842	0.851	0.4918	0.5925
1328	6-keto prostaglandin F1alpha	Lipid	Eicosanoid	20476	LC/MS Neg	100000571	4190	369.228	58961-34-8;58962-34-8	5280888	C05961	HMDB02886	0.4646	0.1039	0.1039	0.1204	0.1039	0.1039	0.1039	0.827	1.1549	0.8562	0.9348	0.1039	0.1039	0.1039	0.1039	0.1039	0.1039	1.3853	0.1039	0.521	0.1039	0.1039	0.1039	0.1039	0.1039	4.3886	3.6002	1.64	2.1763	13.3939	0.1039	0.1039	0.1039	0.1039	0.1039	0.1039	0.1039
3187	6-oxopiperidine-2-carboxylic acid	Xenobiotics	Drug	43231	LC/MS Pos	100004499	1826.6	144.066	34622-39-4	3014237			0.3366	1.0505	1.0879	1.0693	2.3372	0.2244	1.2719	1.1542	2.052	1.5708	1.7906	0.7546	1.3513	2.4181	1.5473	3.038	0.2244	1.2527	2.3552	0.8164	0.8165	0.7648	0.8654	0.9121	0.9495	1.2146	1.1001	0.829	0.2244	1.3537	0.2244	0.8671	3.512	0.8689	0.9085	0.5481	1.114
819	6-phosphogluconate	Carbohydrate	Pentose Phosphate Pathway	15442	LC/MS Neg	100000341	583.9	275.017	921-62-0;53411-70-4	91493	C00345	HMDB01316	0.6149	1.1268	0.61	1	0.3761	0.7899	0.5915	1.3615	0.9133	2.9727	1.1526	0.7163	1.1628	0.1521	0.2017	1.8482	0.9906	0.8651	0.1697	2.0154	1.8493	6.0998	0.5475	1.0094	0.7807	1.2954	2.129	1.3569	2.8633	1.1814	0.7771	0.6407	1.1704	0.7326	0.6546	0.6662	0.2558
1685	7-alpha-hydroxy-3-oxo-4-cholestenoate (7-Hoca)	Lipid	Sterol	36776	LC/MS Neg	100001609	5288.1	429.301	115538-85-7	3081085	C17337	HMDB12458	0.8519	1.8422	1.7803	1	1.5832	1.1996	3.2843	1.4326	1.2238	0.448	3.0395	1.7868	1.4137	0.8171	0.8459	0.6895	0.6128	1.855	0.4994	0.6787	1.5678	0.65	0.8495	0.8047	1.6728	1.1482	1.3735	2.6473	1.6446	0.9674	1.2219	3.6406	0.7682	0.8187	0.4051	0.5285	0.1991
2487	7-methylguanine	Nucleotide	Purine Metabolism, Guanine containing	35114	LC/MS Pos	100001456	1395.6	166.072	578-76-7	11361	C02242	HMDB00897	0.4979	0.7994	0.7984	0.4216	1.5297	0.4317	0.6788	0.678	0.9247	1.0255	0.5604	0.4954	0.802	0.5914	0.7332	0.8172	0.5865	0.6802	0.9004	1.1662	1.0549	1.3467	0.9755	1.4301	2.337	1.3218	0.8031	3.1547	1.437	0.8224	1.0603	1.2692	0.8462	1.1806	1.5799	0.97	1.0369
765	Ac-Ser-Asp-Lys-Pro-OH	Peptide	Polypeptide	40707	LC/MS Pos	100003761	1760	488.235	127103-11-1	4409396			0.0667	0.6028	0.4761	0.247	0.3357	0.0667	0.0667	0.6685	0.6642	0.8988	0.639	0.0667	0.0667	0.0667	0.0667	0.0667	0.0667	0.0667	0.0667	4.1074	6.1918	4.0418	0.7444	1.0264	1.8316	0.5998	7.4323	4.1132	3.4321	3.2795	0.5578	1.1106	3.4707	0.4909	1.9677	0.3132	0.2611
1229	acetylcarnitine	Lipid	Fatty Acid Metabolism(Acyl Carnitine)	32198	LC/MS Pos	100000802	1166.9	204.123	5080-50-2	1	C02571	HMDB00201	0.6426	1.1635	0.9086	2.9457	1.0578	5.096	1.3318	1.1933	1.5151	0.5441	1.0134	0.8844	2.468	0.4948	0.7308	3.8827	2.5526	2.1972	0.6995	0.4877	0.576	0.4395	0.9376	1.2531	1.9691	1.4114	1.2906	0.4738	1.2163	0.9866	1.2449	1.0328	1.1674	1.2643	1.6191	1.2831	0.9804
1000	acetylphosphate	Energy	Oxidative Phosphorylation	15488	LC/MS Polar	1211	4013.9	138.98	94249-01-1	186	C00227	HMDB01494	1.6819	4.9655	2.2329	3.3687	0.7929	1.969	1.0497	3.079	2.4553	1.3992	2.4107	1.8708	1.7486	0.7622	0.9914	2.628	2.1897	1.7772	0.8982	1.5453	1.2298	1.0086	0.4403	0.9079	1	0.4438	1.5412	1.3387	2.689	1.2796	0.3889	0.6805	0.6647	0.4514	0.4576	0.0398	0.3294
362	acisoga	Amino Acid	Polyamine Metabolism	43258	LC/MS Pos	100004541	2290	185.128	106692-36-8	129397			0.4447	0.7349	0.9933	0.9634	1.8219	1.1252	1.2728	0.7722	1.0366	0.9524	1.0825	1.0839	1.7486	1.142	1.0396	1.1494	0.9218	0.9465	1.0067	0.4695	0.6423	0.8405	0.956	1.7616	1.1443	1.2889	0.5879	0.8734	1.059	0.9184	1.0689	1.6169	1.1137	1.0756	0.9426	0.894	1.0519
2452	adenine	Nucleotide	Purine Metabolism, Adenine containing	554	LC/MS Pos	880	1002	136.062	73-24-5	190	C00147	HMDB00034	1.1463	0.4651	0.8757	0.5575	0.2822	0.5621	0.2015	0.168	0.0702	1.2728	0.1737	0.7569	0.4114	0.6329	2.9474	8.1084	1.7275	1.1856	0.3854	1.9339	3.687	1.5729	1.2432	3.9829	0.8095	0.6889	1	0.3048	0.3104	0.3316	15.5769	1.5541	11.5006	1.3919	0.9827	1.7313	2.2679
2451	adenosine	Nucleotide	Purine Metabolism, Adenine containing	555	LC/MS Pos	798	1625.3	268.104	58-61-7	60961	C00212	HMDB00050	0.7475	0.5696	0.8489	0.5598	1.2101	0.2612	0.6815	0.4525	0.7064	0.65	0.5462	1.2597	0.6665	2.4169	2.266	4.2401	2.5092	1.3576	1.2633	0.9942	0.5589	0.8836	1.0776	1.2973	0.468	1.236	0.5255	0.8501	0.478	0.7625	2.5306	1.014	3.7188	1.7733	1.7643	2.9981	1.7529
2446	adenosine 2'-monophosphate (2'-AMP)	Nucleotide	Purine Metabolism, Adenine containing	36815	LC/MS Pos	100001694	1658	348.07	130-49-4	94136	C00946	HMDB11617	2.3784	15.3451	4.5101	2.77	2.2555	0.5171	3.1253	11.7294	11.6387	2.3534	9.0226	5.4331	0.652	0.1656	0.8029	1.9973	0.8287	5.3076	0.217	4.2544	4.7562	1.1156	0.976	0.5008	1.2105	1.1166	2.4329	0.9028	0.5219	1.906	0.0885	0.5128	1.4381	0.3777	0.3057	0.458	1.0642
2447	adenosine 3',5'-cyclic monophosphate (cAMP)	Nucleotide	Purine Metabolism, Adenine containing	2831	LC/MS Neg	207	1952.2	328.045	60-92-4	6076	C00575	HMDB00058	0.2777	0.6608	1.0144	1.1542	1.6845	0.8002	0.7178	0.6194	0.9125	1.4742	0.2777	1.1559	1.8232	0.6844	0.9582	1.4845	1.3377	1.4065	0.7032	1.4048	1.4574	0.5952	1.4231	0.7541	0.8377	1.668	1.3828	0.6621	0.569	0.9032	0.8891	0.8219	1.7071	0.6358	1.1439	0.9856	0.889
2449	adenosine 3',5'-diphosphate	Nucleotide	Purine Metabolism, Adenine containing	15691	LC/MS Neg	1214	575	426.022	75431-54-8	159296	C00054	HMDB00061	0.2454	0.7027	0.2454	4.1958	1	0.2454	1.5872	0.2454	1.1828	0.8019	0.2454	2.6201	0.8975	0.4216	2.5396	0.7279	0.2454	0.2454	0.2454	0.2454	2.5852	0.2894	2.9945	0.2454	1.624	1.067	0.3738	0.2454	0.2454	0.2454	1.0363	0.2454	0.2454	6.4023	0.3751	0.4613	0.3147
2445	adenosine 3'-monophosphate (3'-AMP)	Nucleotide	Purine Metabolism, Adenine containing	35142	LC/MS Pos	100001449	1470	348.07	84-21-9	41211	C01367	HMDB03540	0.2203	1.1246	1.1481	0.5112	0.4076	0.5004	0.3858	1.3012	0.9875	0.5101	0.7823	0.1595	0.0954	0.1117	0.1982	0.0954	0.0954	1.1114	0.4752	7.0306	6.6656	2.105	1.2903	0.6025	5.8946	6.3387	7.89	1.3201	3.2895	4.8743	0.2983	0.6199	0.7448	0.3273	1.178	0.4907	0.1569
2443	adenosine 5'-diphosphate (ADP)	Nucleotide	Purine Metabolism, Adenine containing	3108	LC/MS Neg	208	680	426.022	20398-34-9	6022	C00008	HMDB01341	0.08	0.08	0.08	1.9792	0.4602	0.1566	0.08	0.08	0.08	0.08	0.08	1.1397	1.5729	0.08	0.0971	5.517	4.0235	1.5166	0.08	0.08	0.5904	0.08	0.7481	0.08	0.08	1.0232	0.6049	0.08	0.08	0.08	0.8603	0.5506	2.262	0.9768	2.3987	2.7473	5.3363
2589	adenosine 5'-diphosphoribose (ADP-ribose)	Cofactors and Vitamins	Nicotinate and Nicotinamide Metabolism	558	LC/MS Neg	215	920	558.064	68414-18-6	192	C00301	HMDB01178	0.0334	0.0334	0.0334	0.3198	0.7207	2.8595	0.0334	0.0334	0.0334	0.0334	0.0334	0.6096	3.6879	0.8904	0.189	1.3422	0.841	2.1062	0.1868	0.0334	0.0334	0.0334	0.0334	2.2159	0.0334	0.0334	0.0334	0.0334	0.0334	0.0334	1.3913	2.746	1.6426	0.0334	0.9369	1	0.1701
2444	adenosine 5'-monophosphate (AMP)	Nucleotide	Purine Metabolism, Adenine containing	32342	LC/MS Pos	209	1208	348.07	149022-20-8	6083	C00020	HMDB00045	0.2033	0.1247	0.2942	0.8145	2.227	0.8799	0.1	0.0365	0.2572	0.3356	0.0656	1.1342	2.9571	0.7443	0.9346	14.2785	8.6158	3.7485	0.6028	0.82	1.123	1.0341	2.2748	5.3109	0.5595	2.2883	0.5757	0.9659	0.1923	0.2949	5.7708	5.9537	13.7553	3.0776	2.6912	10.4376	16.2244
2450	adenylosuccinate	Nucleotide	Purine Metabolism, Adenine containing	18360	LC/MS Neg	1303	560	230.53	19046-78-7	195	C03794	HMDB00536	0.2666	0.2666	0.2666	0.2666	0.2666	0.2666	0.2666	0.2666	0.2666	0.2666	0.2666	0.2666	1.9892	0.2666	0.2666	2.8999	3.0138	0.4223	0.2666	0.2666	1.7815	0.2666	0.9443	1	0.2666	0.2666	0.2666	0.2666	0.2666	0.2666	1.0557	0.7359	0.8322	0.2666	0.4869	2.1175	18.9678
1062	adrenate (22:4n6)	Lipid	Polyunsaturated Fatty Acid (n3 and n6)	32980	LC/MS Neg	100001193	5678	331.264	2091-25-0	5497181	C16527	HMDB02226	0.3517	0.3008	0.5143	0.2415	0.4033	0.3606	0.3341	0.9077	0.3049	0.6332	0.3581	0.1553	0.1205	0.1251	0.1237	0.0921	0.0433	0.3262	0.5071	1.9845	4.8519	2.5565	0.8268	1.4598	2.0686	1.4741	2.146	2.1294	3.2928	1.8654	1	1.1955	1.1055	1.0057	1.0379	0.3173	0.1802
25	alanine	Amino Acid	Alanine and Aspartate Metabolism	1126	LC/MS Pos	811	696	90.055	56-41-7	5950	C00041	HMDB00161	0.8007	0.825	1.2124	0.7236	0.9394	1.2777	0.7492	0.9474	1.4606	1.4489	1.0759	0.3612	1.084	0.3603	0.7038	1.1303	0.5704	0.8832	0.5453	1.5722	1.5897	1.6483	1.1522	0.7014	0.9522	1.1204	2.0071	2.4967	1.3973	1.6902	0.608	0.7423	0.7741	1.0152	1.3086	0.7867	1.2526
423	alanylleucine	Peptide	Dipeptide	37093	LC/MS Pos	100001890	2165	203.139	1638-60-4	259583		HMDB28691	0.0305	0.109	0.2018	0.3082	1.3854	0.9903	0.3374	0.0528	0.4935	0.1845	0.1032	0.1072	1.0486	0.0613	0.4824	0.2867	0.3375	1.7379	0.3847	1.1271	6.8286	1.6203	1.1141	4.3258	1.7695	1.8679	1.2914	1.3442	0.4709	0.5082	1.4894	4.863	8.0046	3.4526	1.0327	0.9514	1
2439	allantoin	Nucleotide	Purine Metabolism, (Hypo)Xanthine/Inosine containing	1107	LC/MS Polar	1002	1672	157.037	97-59-6	204	C02350	HMDB00462	1.7675	1.0166	1.7463	2.3108	1.4639	1.8701	1.3345	2.2645	2.3142	2.5909	1.5551	1.6476	1.9207	3.2869	1.3225	0.5412	0.9659	1	2.0376	0.5892	0.5249	0.45	0.5769	0.5702	1.0303	0.573	1.129	1.4802	2.2993	1.1445	0.4342	1.961	0.3173	0.7907	0.4201	0.5073	0.9835
285	alpha-hydroxyisocaproate	Amino Acid	Leucine, Isoleucine and Valine Metabolism	22132	LC/MS Neg	100000706	1840	131.071	10303-64-7	83697	C03264	HMDB00746	0.3749	0.7914	1.0781	1.0593	4.0794	2.6328	0.9811	0.7298	1.7147	0.9039	1.5155	0.5739	5.1951	1	1.4316	2.1162	0.9097	2.1773	0.4649	0.7669	8.2088	1.3366	0.8474	5.4455	1.9273	1.1231	0.7916	2.1382	0.5462	0.6195	6.3242	1.0189	0.529	8.4912	1.3917	5.6471	14.0623
256	alpha-hydroxyisovalerate	Amino Acid	Leucine, Isoleucine and Valine Metabolism	33937	LC/MS Neg	100001300	1126	117.056	600-37-3	99823		HMDB00407	0.4668	0.9293	0.8169	0.7387	1.2682	1.1403	0.5978	0.7666	2.1509	0.638	0.9567	0.5775	1.2279	2.9821	1.0307	1.9198	0.5748	0.8706	2.8402	0.6901	1.1011	0.7111	0.8057	1.3631	1.282	0.6891	0.697	1.9419	0.5952	0.8271	1.5336	0.9693	3.0915	1.2504	1.8068	1.0379	2.4168
250	alpha-hydroxyisovaleroyl carnitine*	Amino Acid	Leucine, Isoleucine and Valine Metabolism	46263	LC/MS Pos	100005836	1863	262.165					0.4745	1	1.3042	1.1149	0.7721	5.7538	1	0.4745	1.5379	1.5701	0.4745	0.4745	2.6856	0.4745	0.7647	4.7501	2.0738	1.6459	0.4745	0.4745	0.7451	0.707	0.7558	1.0403	1.3244	1.2663	0.4745	0.4745	0.4745	0.7758	0.4745	0.6253	0.8638	0.4745	0.8128	0.4745	0.4745
984	alpha-ketoglutarate	Energy	TCA Cycle	528	LC/MS Polar	93	2700	145.014	305-72-6;328-50-7;22202-68-2	51	C00026	HMDB00208	1.2592	0.5695	1.0201	1.1118	0.8782	1	0.5371	0.6746	1.2026	1.0698	0.615	0.7938	0.9408	0.8452	0.6207	1.5427	1.6131	1.1917	0.6	0.9209	0.787	1.2533	0.8544	0.8577	0.8141	1.1882	0.8896	1.0069	1.0401	1.1925	0.7873	0.9476	0.7886	1.0574	1.891	1.4957	1.5531
2608	alpha-tocopherol	Cofactors and Vitamins	Tocopherol Metabolism	1561	GC/MS	1105	2305.4	502.5	59-02-9;10191-41-0	14985	C02477	HMDB01893	0.4749	1.514	0.8001	0.7267	0.6752	0.8364	1.1768	1.214	0.4414	0.5562	0.6872	1	0.9592	0.7133	0.5721	0.6739	0.5383	0.683	0.7348	1.3631	0.901	0.7864	0.6245	1.4221	0.789	0.6156	0.7177	1.3345	0.859	2.402	0.3924	1.5928	1.4322	0.7674	1.2491	0.8065	1.1867
1772	androsterone sulfate	Lipid	Steroid	31591	LC/MS Neg	100001073	5022	369.174	2479-86-9	159663		HMDB02759	1.0909	1.5391	1.3223	2.8517	1	1.8722	9.1266	0.8664	0.5258	0.834	3.0405	2.497	0.9356	0.6997	3.1482	3.3834	1.4217	1.4871	1.6511	1.1375	0.4427	0.3717	1.4362	0.3348	1.7552	3.5448	0.2697	0.203	0.8421	0.9991	1.1765	0.203	0.2673	2.1571	1.6415	0.6499	0.4798
412	anserine	Peptide	Dipeptide Derivative	15747	LC/MS Neg	100000044	1124.8	239.115	10030-52-1	112072	C01262	HMDB00194	0.171	0.2993	0.4487	2.1841	0.9619	5.9232	1.5678	0.0589	3.0616	0.0394	1.8926	0.2473	13.4031	0.0394	0.0394	5.988	6.5963	2.8544	0.0394	0.0394	0.0394	0.4539	0.0394	0.0394	1.77	3.3985	0.0394	0.8906	0.0394	0.4233	0.0394	0.0394	0.0765	0.0394	1.7007	1.0381	0.0394
839	arabinose	Carbohydrate	Pentose Metabolism	575	GC/MS	828	1631.6	217	28697-53-2	66308	C00216	HMDB00646	0.7932	0.7612	0.9695	0.4378	1.5516	0.9876	0.2503	0.3836	1.0992	1.3954	0.6195	0.4524	1.0305	0.9567	0.2437	1.3515	0.7399	0.8033	0.2988	0.2042	1.1066	1.0572	0.4427	1.9807	1.3521	1.5965	1.9384	0.5901	0.9254	0.7936	0.3143	1.5842	2.5109	0.704	1.6797	2.3661	1
844	arabitol	Carbohydrate	Pentose Metabolism	38075	GC/MS	100000012	1687.5	307.1	7643-75-6	94154	C01904	HMDB00568	0.4524	0.6983	0.4967	0.75	1.4737	1.0068	0.5557	0.4983	0.9618	1.4862	0.7167	0.4313	1.5659	0.4313	0.634	0.6412	0.4313	0.6353	0.7317	1.0382	1.3679	0.9183	0.7719	1.7747	1.2631	1.5546	0.4818	0.9542	0.7798	1.2739	1.236	1.8248	0.7272	1.6359	1	0.8583	0.5063
1033	arachidate (20:0)	Lipid	Long Chain Fatty Acid	1118	LC/MS Neg	893	6295	311.296	506-30-9	10467	C06425	HMDB02212	0.6787	0.5226	0.9762	0.735	0.6799	0.4403	0.578	1.0239	0.8495	0.8111	0.7455	0.5843	0.4268	0.4546	0.7721	0.7113	0.9324	0.6786	0.9256	2.3856	2.1662	1.0911	1	0.917	0.8279	1.1235	1.1374	1.5384	1.4413	1.0238	1.7844	0.7229	0.9674	1.6511	0.9253	0.7691	0.7786
1061	arachidonate (20:4n6)	Lipid	Polyunsaturated Fatty Acid (n3 and n6)	1110	LC/MS Neg	229	5535	303.233	506-32-1	444899	C00219	HMDB01043	0.7712	0.638	1.2405	0.7455	0.8278	0.7835	0.7444	0.9114	0.7102	1.23	0.7335	0.3632	0.5298	0.314	0.4765	0.3032	0.3151	1	0.4579	1.6592	2.7417	1.3094	1.0657	1.4945	1.7964	1.0384	1.8089	1.8495	2.086	1.3815	0.7215	1.4716	1.0069	0.9184	0.5247	0.5999	0.2989
325	arginine	Amino Acid	Urea cycle; Arginine and Proline Metabolism	1638	LC/MS Pos	231	700	175.119	1119-34-2	232	C00062	HMDB00517	0.7132	1.378	1.1776	0.7596	0.8846	0.4425	0.7786	1.3202	1.4764	1.6036	1.3962	0.6591	0.3993	0.2422	0.5408	0.2395	0.2008	0.6546	0.4055	1.7725	2.2143	1.6555	0.9483	0.9737	1.0818	1.0357	2.5295	2.3974	1.9523	1.9594	0.397	0.9027	1	0.9161	0.5733	0.3843	0.556
330	argininosuccinate	Amino Acid	Urea cycle; Arginine and Proline Metabolism	15497	LC/MS Neg	232	638.1	289.115	156637-58-0	16950;828	C03406	HMDB00052	2.3869	1.9969	3.9662	0.9179	0.852	0.1796	1	3.1484	2.7175	7.447	2.0821	0.3436	0.2993	0.253	1.1554	0.2269	0.0896	0.8529	0.3733	1.4218	0.2904	0.6624	0.787	0.3489	1.6366	1.5175	3.555	3.1636	3.0908	3.4838	0.1684	0.2086	0.0896	0.442	0.4571	0.0896	1.7321
2602	ascorbate (Vitamin C)	Cofactors and Vitamins	Ascorbate and Aldarate Metabolism	32354	LC/MS Neg	233	645.3	175.025	134-03-2		C00072	HMDB00044	0.0777	0.099	0.3095	0.0052	0.7945	0.0052	0.0561	0.0052	0.0321	0.0052	0.0052	0.0121	0.1848	0.0746	0.5474	0.1289	0.0567	0.2996	0.0409	0.9631	2.4635	1	1.8157	1.5306	1.0141	1.6555	2.4072	2.4792	0.1692	0.2609	1.7562	2.3716	5.7393	1.6613	1.2441	0.481	0.3532
30	asparagine	Amino Acid	Alanine and Aspartate Metabolism	512	LC/MS Polar	917	2951.1	131.046	70-47-3	6267	C00152	HMDB00168	0.3618	0.6155	0.7015	0.5058	0.9956	0.5442	0.5216	0.9568	1.0044	1.0541	0.9158	0.3008	0.8455	0.1443	0.3113	0.3043	0.1737	0.6674	0.5499	1.7779	1.9556	1.8093	1.1256	1.0306	1.0797	1.3271	1.7946	1.9609	1.6995	1.9329	0.4827	0.8387	0.9809	0.9112	1.1321	0.5528	0.6845
28	aspartate	Amino Acid	Alanine and Aspartate Metabolism	443	LC/MS Neg	234	640	132.03	56-84-8	5960	C00049	HMDB00191	0.6438	0.6438	0.942	0.3322	0.7203	0.2447	0.3723	1.1396	0.9676	0.9815	1.1249	0.2651	0.326	0.1111	0.32	0.304	0.1296	0.3964	0.3997	1.4693	1.2194	1.277	1.0467	1.2208	0.9652	0.8252	2.1336	2.3917	1.6984	2.1441	0.3345	1.2177	1.1768	0.7227	1.0615	0.9186	1.3965
1144	azelate (nonanedioate)	Lipid	Fatty Acid, Dicarboxylate	18362	LC/MS Neg	2029	1276	187.098	123-99-9	2266	C08261	HMDB00784	2.935	25.8482	20.3822	18.7202	1.2042	1.4871	0.9703	1.191	1.5257	1.7764	1.971	3.5451	0.8402	0.7923	0.4974	0.5099	0.656	0.8746	0.9042	6.4706	2.3741	0.9309	3.6948	0.6281	3.7085	1.7103	0.7656	1.2713	0.6507	1.2839	0.9361	0.667	1.3983	0.5525	1.0489	0.731	0.6157
2683	benzoate	Xenobiotics	Benzoate Metabolism	15778	LC/MS Neg	100000008	1750	121.029	65-85-0	243	C00180	HMDB01870	1.2296	1.9037	1.1449	0.7755	1.0596	0.6957	2.0538	1.3972	1.276	0.7479	1.0328	2.1668	0.6212	1.2189	1.6094	0.7787	0.7083	1.2033	1.5555	1.1197	0.8741	0.9031	1.5644	0.7913	2.2364	1.0161	0.9686	1.6348	1.1029	0.8573	1.1642	0.7355	0.9044	0.9795	0.9171	0.86	0.972
2534	beta-alanine	Nucleotide	Pyrimidine Metabolism, Uracil containing	55	GC/MS	244	1451.8	174	56-41-7;107-95-9	239	C00099	HMDB00056	0.2656	0.5617	0.3143	1.2619	0.3816	2.3203	1.1658	0.226	1.1078	0.3368	0.6459	0.3427	1.3141	0.1282	0.5711	1.502	0.5387	1.1778	0.3954	1.1161	0.741	0.5385	0.7501	1.0673	0.9577	1.7529	1.0074	1.0157	0.8534	0.9843	0.7343	0.7357	1.3611	1.9755	1.9114	1.0189	1.4493
248	beta-hydroxyisovalerate	Amino Acid	Leucine, Isoleucine and Valine Metabolism	12129	LC/MS Neg	1442	1027	117.056	625-08-1	69362		HMDB00754	0.5807	1.1653	0.5975	1.0866	1.9384	0.7545	0.9781	0.6987	1.2804	1.6851	1.1443	1.4695	1.3516	2.0576	1.4677	1.339	1.5382	1.7618	2.2125	0.8092	0.8364	0.4332	0.7808	0.6986	1.2412	0.9337	0.5838	1.363	1.8219	1.1089	0.7382	0.6184	0.7504	1.1598	1.633	0.9706	1.0896
249	beta-hydroxyisovaleroylcarnitine	Amino Acid	Leucine, Isoleucine and Valine Metabolism	35433	LC/MS Pos	100001594	1701	262.165	99159-87-2				0.5485	1	1.1989	1.6381	0.9621	5.8414	1.1775	0.4535	1.8134	0.9012	0.9185	0.4205	4.2553	0.5389	0.5823	2.4219	5.243	1.1244	0.6871	0.7466	1.6808	1.0081	0.865	1.4365	2.0748	2.0022	0.7729	0.7152	2.254	1.6423	0.7084	1.0841	1.17	1.5272	1.7921	1.1599	0.6335
6	betaine	Amino Acid	Glycine, Serine and Threonine Metabolism	3141	LC/MS Pos	799	734	118.086	107-43-7	247	C00719	HMDB00043	0.7387	0.8647	0.8537	0.5248	0.9408	0.6401	0.8689	0.5065	0.6007	0.9402	0.7454	0.8065	0.5647	1.3296	0.8803	0.7411	0.738	0.762	2.8696	0.9855	1.616	1.173	0.9945	1.2874	1.3084	1.1572	1.217	0.8486	0.9134	1.1062	1.2402	1.1667	1.9212	1.0822	1.439	1.2769	1.0114
7	betaine aldehyde	Amino Acid	Glycine, Serine and Threonine Metabolism	15499	LC/MS Pos	1219	646.2	120.102	7758-31-8	249	C00576	HMDB01252	28.3209	2.3029	7.0052	0.7424	1.346	0.307	1.0604	3.1046	0.4178	27.2791	1.7902	1.244	1.0322	4.9164	9.4886	0.109	0.2219	0.2364	4.4603	0.8255	0.2505	0.2352	0.4769	0.109	2.0662	2.437	1.135	9.3005	1.0941	3.2656	0.1344	0.1513	0.109	1	0.109	0.2351	0.109
2643	bilirubin (Z,Z)	Cofactors and Vitamins	Hemoglobin and Porphyrin Metabolism	43807	LC/MS Neg	1090	4796.2	583.256	635-65-4	5280352	C00486	HMDB00054	0.384	2.3081	1.2791	0.1406	2.9902	0.1406	2.5826	0.3872	0.1439	0.1406	0.46	0.2959	2.3046	0.3058	0.9568	1.5854	0.9269	0.9926	0.9513	1.424	1.079	0.6835	1.6932	1.0926	0.8212	2.3571	1	0.1406	0.2636	0.5402	1.3677	1.0579	0.2759	1.5335	1.6772	0.8352	0.4223
2646	biliverdin	Cofactors and Vitamins	Hemoglobin and Porphyrin Metabolism	2137	LC/MS Neg	250	4695.6	581.241	55482-27-4;55482-27-4	5353439	C00500	HMDB01008	0.2931	3.5552	0.2931	0.4321	1.1771	0.2931	3.3143	1.8769	0.9469	0.2931	1.0531	2.1805	1.5395	0.2931	0.635	2.177	1.2393	0.6598	1.7921	2.2106	1	0.4829	0.7149	0.2931	0.3573	0.7243	0.9606	0.2931	0.8502	0.5645	0.3172	0.2931	0.2931	0.7387	1.3967	0.2931	0.2931
2628	biopterin	Cofactors and Vitamins	Tetrahydrobiopterin Metabolism	12358	LC/MS Pos	1548	1562.7	238.093	22150-76-1	445040	C06313	HMDB00468	0.3241	0.3241	0.3241	0.3241	0.3241	0.3241	0.3241	0.3241	0.3241	0.3241	0.3241	0.3241	0.3241	0.3241	0.3241	0.3241	0.3241	0.3241	0.3241	0.6024	0.6182	1.5265	0.3241	0.3241	0.3241	0.3241	0.688	0.3241	5.4167	1.6038	0.3241	0.3241	1.1823	0.3241	1	0.3241	0.3241
1212	butyrylcarnitine	Lipid	Fatty Acid Metabolism (also BCAA Metabolism)	32412	LC/MS Pos	100001054	1977	232.154	25576-40-3	439829	C02862	HMDB02013	0.6324	0.761	1.5694	0.8428	0.7182	11.1143	0.888	0.6291	1.2967	0.4941	0.5952	0.4373	3.3029	0.2047	0.3321	5.6696	4.6609	1.6189	0.3185	1.1613	0.7416	0.4477	0.5321	7.6522	2.5728	1.0023	3.029	0.8623	1.0712	1.3495	1.7152	4.5439	4.3917	0.9977	1.1509	3.2091	1.5334
234	C-glycosyltryptophan	Amino Acid	Tryptophan Metabolism	48782	LC/MS Pos	100006379	1907	367.15	180509-18-6	10981970			0.1996	0.3727	0.4768	0.253	1.2772	0.4669	0.4048	0.6681	0.5635	0.462	0.5291	0.3616	0.5163	0.25	0.2924	0.5013	0.3079	0.7727	0.7553	1.0114	1.0328	1.3651	0.9581	1.8549	1.312	1.4471	1.1333	1.1196	2.4045	1.261	0.8964	1.324	1	1.6604	1.661	0.781	1.1665
91	cadaverine	Amino Acid	Lysine Metabolism	15308	LC/MS Pos	100000110	593.9	103.123	462-94-2;1476-39-7	273	C01672	HMDB02322	0.266	0.266	2.5253	0.3573	1.9577	1.6008	0.266	0.4858	1.1406	0.266	1.4293	0.3879	3.0302	0.266	0.266	3.2355	0.266	1.0259	0.266	0.3638	1	0.5531	0.266	0.6712	0.8176	0.266	1.1983	0.266	0.266	0.266	4.2547	0.266	0.5551	0.266	1.2054	0.266	0.756
2734	caffeine	Xenobiotics	Xanthine Metabolism	569	LC/MS Pos	849	2819	195.088	58-08-2	2519	C07481	HMDB01847	1	1	1	1	1	1	1	1	1	1	1	1	1	1	1	1	1	1	1	1	1	1	1	1	1	1	1	1	1	1	1	1	1	1	1	1	1
1008	caprate (10:0)	Lipid	Medium Chain Fatty Acid	1642	LC/MS Neg	888	5090.7	171.139	112-37-8	2969	C01571	HMDB00511	0.7669	0.6539	0.8262	0.911	0.9478	0.7259	3.4244	0.948	0.9406	0.9042	1.002	1.1832	0.5589	0.6682	0.7459	0.5492	0.7114	0.9175	2.6803	1.4225	1	0.9099	1.3496	0.8262	0.7571	1.379	0.9162	2.8652	1.1178	0.9657	1.3832	0.5727	0.7269	0.9604	0.6919	0.7798	0.6926
1004	caproate (6:0)	Lipid	Medium Chain Fatty Acid	32489	LC/MS Neg	926	2713.7	115.076	142-62-1	8892	C01585	HMDB00535	1.2929	1.3488	1.6315	1.0376	0.6805	1.0893	2.1481	1.1479	1.3669	1.1825	1.1377	1.8632	0.7852	0.6224	0.9317	0.845	1.0542	1.5555	1.6983	1.955	0.7113	0.9683	1.127	0.7844	0.9541	1.5021	1.2975	2.886	0.8945	0.8881	0.869	0.8376	1.1028	0.934	1	1.0283	0.8361
1006	caprylate (8:0)	Lipid	Medium Chain Fatty Acid	32492	LC/MS Neg	932	4362	143.108	124-07-2	379	C06423	HMDB00482	1.0711	0.4927	1.3881	0.6492	0.816	0.5143	7.6906	1.1965	0.9999	0.547	1.0001	1.1592	0.4192	0.682	0.6556	0.2545	0.9642	1	3.5426	1.2605	0.7033	0.7959	1.3052	0.7244	0.8042	1.641	2.8694	4.2527	0.839	0.8238	1.2505	1.361	0.6035	0.8525	0.6794	1.2294	0.348
1248	carnitine	Lipid	Carnitine Metabolism	15500	LC/MS Pos	100000007	688.9	162.112	461-05-2	10917	C00318	HMDB00062	0.6924	0.7867	0.8516	1.6245	0.9564	3.7918	0.8887	0.6316	1.4927	0.8297	0.9581	0.5238	3.2592	0.485	0.8066	1.9956	1.394	1.2401	0.4749	0.8559	1.0064	1.0187	0.88	1.242	1.2124	1.042	1.1416	1.3113	1.182	0.9891	0.7687	1.0744	1.1897	1.2341	1.1445	1.0769	1.1989
409	carnosine	Peptide	Dipeptide Derivative	1768	LC/MS Neg	249	804	225.099	305-84-0	439224	C00386	HMDB00033	0.9609	6.4473	5.1227	51.2071	5.132	125.378	6.6626	1	7.9059	1.0731	2.1264	3.3668	70.0964	0.498	0.4242	107.264	56.0778	41.77	0.5251	0.8	0.8662	2.8525	0.9005	0.6572	22.7491	5.1693	0.7364	1.7793	1.3829	1.0987	0.0398	0.15	0.085	1.0625	12.7019	6.4735	1.6326
2700	catechol sulfate	Xenobiotics	Benzoate Metabolism	35320	LC/MS Neg	100001605	1906	188.986	4918-96-1	3083879	C00090	HMDB59724	1.1069	5.1876	1.7146	2.6605	4.4649	1.1933	1.5237	0.8411	2.4272	0.7797	0.5384	1.0834	3.8339	1.3539	1.8032	0.1576	0.7901	0.4539	0.9231	0.7984	1.9504	0.9208	1.8285	2.6297	1.0116	0.8286	0.4671	0.7253	0.7732	0.1204	0.4634	2.6516	0.6693	0.7146	0.1204	0.5631	0.2891
1391	chiro-inositol	Lipid	Inositol Metabolism	37112	GC/MS	100001859	1857	318.1	643-12-9		C19891	HMDB34220	0.3099	0.8855	0.206	0.1701	2.613	0.8119	0.9887	1.0843	2.04	0.1701	0.8983	0.1701	2.2506	0.1701	0.4536	0.1701	0.8395	0.8276	0.1794	0.9953	2.2396	0.1701	0.1701	1.5326	0.1701	3.1503	1	1.0327	0.1701	0.5089	0.1701	1.3945	0.1701	1.1619	0.9	0.1701	0.1701
1840	cholate	Lipid	Primary Bile Acid Metabolism	22842	LC/MS Neg	136	5165	407.28	81-25-4	221493	C00695	HMDB00619	1	0.1523	0.1523	0.1523	0.6926	0.1523	2.5233	0.1523	0.1523	0.1523	0.1523	0.7336	0.6303	2.0615	0.1523	0.1523	0.1523	0.1523	2.1571	0.1523	0.1523	0.1523	0.1523	0.1523	0.1523	1.1062	0.1523	0.1523	0.6509	0.1523	0.1523	0.2991	1.2664	0.1523	0.1523	0.1523	3.4553
1675	cholesterol	Lipid	Sterol	63	GC/MS	266	2316.9	329.3	57-88-5	11025495	C00187	HMDB00067	0.6968	1.0513	0.7733	0.6153	0.708	0.467	0.6727	0.9428	0.6867	0.7037	0.5895	1.142	0.7109	0.6993	0.8983	0.7405	0.4994	0.668	0.8249	1.4404	1.2665	1.1201	0.6366	1.4106	0.839	1.1818	0.9255	1.2036	1.0893	1.1544	0.733	0.8692	2.1333	1.0423	0.9741	1.1885	1.1174
1417	choline	Lipid	Phospholipid Metabolism	15506	LC/MS Pos	1256	675	104.107	67-48-1	305	C00114	HMDB00097	1.0118	0.9284	1.3724	0.7142	0.9598	0.6475	0.7412	0.9759	0.9832	1.8826	0.9778	0.6285	0.7503	0.6916	0.8709	0.6778	0.603	0.6306	0.8949	1.0105	0.8528	0.9521	0.9689	0.7954	1.205	1.3297	1.1933	1.3788	1.3829	1.3996	1.1275	0.7144	1.0097	0.9895	0.9814	1.0364	0.7645
1418	choline phosphate	Lipid	Phospholipid Metabolism	34396	LC/MS Pos	267	692.5	184.073	72556-74-2	1014	C00588	HMDB01565	2.1496	1.1827	2.6615	0.394	0.5788	0.2818	0.7941	1.0504	0.4216	4.4418	1.0534	0.5569	0.3377	2.167	3.1768	0.2666	0.3959	0.2886	0.8126	0.9559	0.7543	0.5858	1.1911	0.4551	1	1.8408	1.3242	12.4282	0.8024	2.1568	1.2336	1.2535	3.9929	0.9791	0.7831	2.0824	0.633
1026	cis-vaccenate (18:1n7)	Lipid	Long Chain Fatty Acid	33970	GC/MS	100001228	1987	339.3	506-17-2	5282761	C08367	HMDB03231	0.4799	0.432	0.5208	0.4796	0.475	0.4181	0.3725	0.5591	0.5364	0.6111	0.6205	0.4452	0.2769	0.2137	0.4015	0.3687	0.2446	0.5348	0.3928	2.201	2.2056	1.3417	0.7388	1.7475	1.2377	1.0432	1.1231	1.5	1.4244	1.9978	1.0243	0.9982	1.3632	0.7675	1.033	0.4529	1
979	citrate	Energy	TCA Cycle	1564	LC/MS Neg	1124	582	191.02	77-92-9	311	C00158	HMDB00094	1.2218	3.4595	1.8502	1.201	2.7618	0.4508	2.3877	3.5517	2.5046	8.1522	2.009	3.5745	0.9387	2.7116	2.3254	1.742	0.713	0.6476	1.5128	0.8479	0.9734	0.4413	1.1947	0.3543	0.5884	0.5453	1.5495	0.3794	0.9331	1.9507	1	6.6288	0.3337	0.6136	1.1885	0.482	0.8427
329	citrulline	Amino Acid	Urea cycle; Arginine and Proline Metabolism	2132	LC/MS Pos	391	730.3	176.103	372-75-8	9750	C00327	HMDB00904	5.2384	2.7666	7.0091	0.8349	0.8346	1.2581	0.9948	2.7563	2.501	6.7538	3.2115	0.4457	0.7165	0.2472	0.8089	0.4937	0.4587	1.4359	0.9716	1.969	0.9489	1.6028	0.8334	0.5902	1.7164	2.3145	1.5567	2.2684	1.653	3.5254	1.0085	0.4038	0.1637	0.9033	0.6968	0.6193	0.7307
2598	coenzyme A	Cofactors and Vitamins	Pantothenate and CoA Metabolism	46322	LC/MS Neg	270	1448	382.55	85-61-0;18439-24-2	317	C00010	HMDB01423	0.1663	0.1663	0.1663	0.1663	0.6852	0.7028	0.1663	0.1663	0.1663	0.1663	0.1663	0.7878	1.4687	0.4557	0.2601	4.2879	2.4422	0.383	0.1663	0.1663	0.1663	0.4252	1.0447	1.9402	0.1663	0.466	0.1663	0.1663	0.1663	0.1663	1.7172	1.9771	2.7519	1.6579	5.6947	5.409	7.748
1756	cortisol	Lipid	Steroid	1712	LC/MS Pos	356	4561.9	363.217	50-23-7	5754	C00735	HMDB00063	2.2991	4.0546	2.3982	6.0202	1.8525	0.1028	0.6494	7.3291	0.9058	0.1028	0.1028	1.3766	2.5367	0.7781	1.5446	0.9994	0.4712	2.5888	0.5224	2.069	3.9565	1.4822	3.9649	0.9276	0.627	0.2963	6.8108	0.2143	0.7841	0.1028	0.8684	0.8287	0.1028	2.2267	1.9245	0.1028	0.4485
1761	cortisone	Lipid	Steroid	1769	LC/MS Pos	273	4407.9	361.201	53-06-5	222786	C00762	HMDB02802	0.368	0.3181	0.3517	0.4198	0.3181	0.3181	0.3181	0.3181	0.7437	2.8185	0.3181	0.3181	0.3181	0.3181	0.3181	0.3181	0.3181	0.3181	0.3181	0.9218	0.3181	2.7109	0.3181	1.8478	0.3181	0.3181	0.3181	1.3965	0.8589	0.3181	0.3181	1.3211	0.3181	0.3517	0.3181	0.3181	1.0681
2750	cotinine	Xenobiotics	Tobacco Metabolite	553	LC/MS Pos	848	1525.2	177.102	486-56-6	854019		HMDB01046	5.8304	1.0686	2.4545	0.9334	0.0468	1.3427	0.0572	0.0176	0.0499	0.0176	0.0859	2.9809	0.0936	0.0176	0.0176	0.0176	4.1487	0.0176	0.0176	4.5244	0.8916	1.8314	0.9263	0.0337	1.3383	0.1686	0.0176	0.0176	0.0176	0.0176	3.6172	0.0176	0.0176	0.0176	0.0176	4.485	0.0186
353	creatine	Amino Acid	Creatine Metabolism	27718	LC/MS Pos	1221	771	132.077	57-00-1	586	C00300	HMDB00064	0.7645	0.8677	1.0838	1.678	0.9492	4.3089	1.0405	0.5769	1.588	1.1559	0.8993	0.5932	3.9297	0.4165	0.8321	3.109	2.4083	1.5622	0.507	1.5578	0.8899	1.5026	1.1063	0.9962	1.2732	1.0711	0.5621	0.9095	0.7966	0.6049	1.3844	0.749	1.4646	1.3049	1.1129	1.1964	1.8745
356	creatine phosphate	Amino Acid	Creatine Metabolism	33951	LC/MS Polar	100000112	3831	210.029	922-32-7	587	C02305	HMDB01511	5.7164	6.8177	0.9013	3.3555	3.0244	0.2226	1.3242	2.3003	1.0987	0.2226	4.1786	16.5471	1.3963	2.8792	1.358	6.6686	0.668	0.2226	1.4689	0.3495	0.2226	0.2226	0.6344	0.2226	0.2956	0.5892	0.2226	1.6491	1.0403	0.4334	1	0.2226	0.2226	0.4697	0.858	0.2226	0.2227
354	creatinine	Amino Acid	Creatine Metabolism	513	LC/MS Pos	275	730.8	114.066	60-27-5	588	C00791	HMDB00562	0.9959	1.14	0.7433	1.1147	1.3407	1.9555	1.0525	1.0678	1.2083	1.0202	1.0041	0.8181	1.6516	0.6949	1.0899	1.7954	0.977	0.9482	0.5195	1.0499	0.9724	0.8178	1	1.4067	1.048	0.9468	0.7361	1.1518	0.9446	0.9286	0.9439	1.4265	0.8945	1.0302	1.3032	0.8089	1.1727
511	cyclo(pro-val)	Peptide	Dipeptide	49795	LC/MS Pos	100006065	2794	197.128	2854-40-2	98951			0.9164	1.7553	1.3838	2.6698	1.4109	0.7274	1.1592	1	0.7371	0.5643	1.5911	3.1343	0.7199	0.9912	1.0291	1.6981	0.8572	1.2076	0.697	1.0242	3.2246	1.3291	2.1961	0.4657	1.0583	1.4148	0.8921	0.3126	0.635	1.2152	3.5884	0.7197	0.6876	0.8929	0.6609	1.4419	0.7296
302	cystathionine	Amino Acid	Methionine, Cysteine, SAM and Taurine Metabolism	15705	LC/MS Pos	310	674.7	223.075	535-34-2	439258	C02291	HMDB00099	0.0555	0.0555	0.3182	0.0555	0.0555	0.0555	0.0555	0.0555	0.0555	0.0555	0.0555	0.0555	0.0555	0.0555	0.0555	0.0555	0.0555	0.0555	0.097	1	4.5036	1.9778	2.1661	0.2341	1.1922	1.9827	0.0555	0.3751	0.0555	0.0555	0.5866	0.4327	0.1171	2.38	0.0555	0.0555	2.1194
307	cysteine	Amino Acid	Methionine, Cysteine, SAM and Taurine Metabolism	1868	LC/MS Pos	800	736.4	122.027	52-90-4;56-89-3	5862	C00097	HMDB00574	0.7937	0.8235	2.4883	0.0433	0.0736	0.0433	0.1291	0.1598	0.8626	1	0.1173	0.0433	6.5727	0.0433	0.5832	2.9641	0.0433	0.0581	0.0433	4.3886	56.5251	20.5378	0.0433	1.0147	2.5495	0.0801	7.967	2.3868	0.7394	2.0942	0.0433	46.3348	0.1225	0.7243	3.5509	2.5964	0.1052
315	cysteine sulfinic acid	Amino Acid	Methionine, Cysteine, SAM and Taurine Metabolism	37443	LC/MS Neg	100002113	637.5	152.002	207121-48-0	109	C00606	HMDB00996	0.1315	0.8425	0.3216	0.1315	0.1315	0.1315	0.1315	1	0.1315	0.1315	0.8173	0.1315	0.1315	0.1315	0.1315	0.1315	0.1315	0.1315	0.1315	1.1009	0.4203	0.1315	6.4693	0.1315	0.8028	1.1824	0.7807	3.2872	1.0514	1.1675	2.3766	0.1315	0.1315	1.6031	0.1315	0.1315	0.1315
380	cysteine-glutathione disulfide	Amino Acid	Glutathione Metabolism	35159	LC/MS Pos	100001437	824	214.051	13081-14-6	4247235		HMDB00656	0.304	5.0445	0.9677	1.7169	0.5259	0.6062	1.5819	0.5427	1.7948	0.8788	0.8158	0.7721	1.6128	0.7024	1.4299	3.0102	0.222	0.7776	0.8546	6.1842	21.4087	8.9059	0.9754	1.0323	6.2585	0.7455	0.8957	0.6276	1.733	0.1341	0.6102	2.2487	1.0106	0.485	2.323	0.6078	0.7745
383	cysteinylglycine	Amino Acid	Glutathione Metabolism	35637	LC/MS Pos	278	790	179.048	19246-18-5	439498	C01419	HMDB00078	0.8955	2.2419	1.7787	0.151	0.1445	0.3963	0.1445	0.1445	0.9207	2.0766	0.1445	0.3394	0.9363	0.1445	0.5472	4.1049	0.867	0.6336	0.1445	0.5681	26.1154	4.7462	0.3732	1.6132	0.9078	0.4005	1.3909	0.3365	0.353	0.6695	1	5.7463	2.4196	2.3982	4.3012	1.4093	1.8565
309	cystine	Amino Acid	Methionine, Cysteine, SAM and Taurine Metabolism	56	LC/MS Pos	279	675	241.031	56-89-3	67678	C00491	HMDB00192	1.0333	1.1546	1.4226	0.0213	0.0116	0.0116	0.0211	0.7957	0.789	1.4066	1.4024	0.0116	0.0413	0.0406	0.0314	0.0116	0.0116	0.0116	0.0248	2.6672	1.4365	0.9667	0.0116	0.0116	0.0762	0.0116	1.3551	1.1768	1.4303	1.9397	0.0116	0.3304	0.0116	0.0116	0.0116	0.0116	0.0116
2543	cytidine	Nucleotide	Pyrimidine Metabolism, Cytidine containing	514	LC/MS Pos	827	1075.9	244.093	65-46-3	6175	C00475	HMDB00089	2.6443	2.1274	1.9951	0.3012	0.8923	0.2819	0.9395	1.6987	0.6845	1	1.2094	5.9757	0.3997	4.8124	7.1149	1.109	0.6681	0.8183	0.953	1.5277	1.1858	0.6232	0.5803	0.4613	1.0317	1.047	0.8522	1.1243	0.8748	1.1372	2.4092	0.298	0.77	4.3566	0.5877	0.1029	0.3587
2542	cytidine 2',3'-cyclic monophosphate	Nucleotide	Pyrimidine Metabolism, Cytidine containing	37465	LC/MS Neg	73	937	304.034	15718-51-1	417654	C02354	HMDB11691	0.9111	1.7509	0.8548	1.6971	2.558	0.246	1.4751	1.3899	2.7096	0.246	1.7574	10.4814	1.1371	0.7601	0.246	3.9804	1.0151	4.363	0.5136	1.9633	0.443	0.3896	0.246	0.9181	1.1922	2.0804	0.8095	0.246	0.246	0.7236	0.963	0.8608	0.5414	0.246	1.8598	0.4959	0.8105
2541	cytidine 3'-monophosphate (3'-CMP)	Nucleotide	Pyrimidine Metabolism, Cytidine containing	2959	LC/MS Pos	105	1203	324.059	84-52-6	66535	C05822		1.2085	0.9048	0.9531	1.0156	0.7089	0.6357	1.1094	2.8559	0.9807	0.1932	1.2796	1.6494	0.1932	1.1656	0.5729	0.2658	0.3945	0.7831	0.5512	3.7689	1.5823	0.5121	0.5625	0.5488	2.1492	3.1614	2.0547	1.2158	0.6144	2.954	0.3659	0.8774	0.9844	0.2322	1.5228	0.6006	0.1932
1419	cytidine 5'-diphosphocholine	Lipid	Phospholipid Metabolism	34418	LC/MS Pos	1220	776.6	489.115	33818-15-4	13804	C00307	HMDB01413	0.0764	0.0764	0.0764	0.1147	0.1724	0.2655	0.0885	0.0764	0.1735	0.0764	0.0764	0.0764	0.0764	0.0914	0.2298	0.5514	0.1498	0.2849	0.1083	1.2225	1.4606	1.0427	1.4885	1.0228	1.2583	2.179	0.766	0.8258	0.123	0.2542	1.6734	0.7239	2.5787	1.5927	1.8267	1.3203	1.8478
2540	cytidine 5'-monophosphate (5'-CMP)	Nucleotide	Pyrimidine Metabolism, Cytidine containing	2372	LC/MS Pos	282	890	324.059	63-37-6	6131	C00055	HMDB00095	0.3402	0.7148	0.5836	0.4789	1.498	0.6494	0.6594	0.5597	1.2935	2.4176	1.0425	1.6576	1.003	0.7609	1.0377	1.4021	0.6746	1.6805	0.5587	1.028	0.7967	1.0866	1.1316	1.1623	0.7059	1.8916	0.6106	1.1913	0.8352	0.4034	1.7474	0.8075	1.3523	1.8641	1.6275	0.9201	3.0487
940	cytidine 5'-monophospho-N-acetylneuraminic acid	Carbohydrate	Nucleotide Sugar	36831	LC/MS Polar	1223	3900	613.14	3063-71-6	448209	C00128	HMDB01176	0.3721	1	0.5363	0.4709	1.6148	0.8024	0.6869	0.6712	1.7081	2.8777	1.195	1.5208	0.9956	0.692	0.943	1.1986	0.4649	2.0463	0.5764	1.0933	0.6598	1.1972	1.2585	1.0124	0.6242	1.651	0.642	1.1058	0.9306	0.4178	1.1154	0.7999	1.5334	1.3527	1.9081	1.0412	4.5044
1425	cytidine-5'-diphosphoethanolamine	Lipid	Phospholipid Metabolism	34410	LC/MS Pos	100001407	761.8	447.068	72842-05-8	123727	C00570	HMDB01564	0.0941	0.0941	0.0941	0.2528	2.0335	0.4369	0.2662	0.0941	0.295	0.0941	0.0941	0.5442	0.9193	0.2889	0.6851	1.2175	0.5162	0.7139	0.1215	0.8748	1.3431	1.4016	1.0852	1.3058	0.7827	1.0531	0.4926	0.5261	0.0941	0.0941	1.0926	0.81	2.5391	1.1476	1	1.4139	2.0068
1235	decanoylcarnitine	Lipid	Fatty Acid Metabolism(Acyl Carnitine)	33941	LC/MS Pos	100001251	4700	316.248	1492-27-9	10245190		HMDB00651	0.5738	1.1702	0.8211	1.2922	1.2236	1.5113	4.038	1.0058	1.3026	0.1687	2.0103	1.9822	5.5581	0.6623	0.7176	4.5634	3.5546	1.1786	1.969	0.4043	0.5656	0.0828	1.1037	0.4607	0.4651	1.093	0.5018	0.776	0.7378	1.2454	25.6384	0.7952	0.2615	2.2239	0.6948	0.907	1.3227
2603	dehydroascorbate	Cofactors and Vitamins	Ascorbate and Aldarate Metabolism	34302	LC/MS Neg	301	739.6	173.009	490-83-5	835	C05422	HMDB01264	0.2656	1.3036	1.5744	0.2656	1.2372	1.1749	0.4337	0.3286	1.4159	2.0441	0.6786	0.5024	1.0559	0.3012	0.4835	1.0548	0.7605	1.3033	0.413	2.7546	1.8338	1.0325	0.9159	0.2656	1.505	0.8011	5.732	2.3434	3.1037	1.5962	0.9012	0.2708	0.4919	0.5698	0.3393	0.3557	0.4294
1766	dehydroisoandrosterone sulfate (DHEA-S)	Lipid	Steroid	32425	LC/MS Neg	100000792	4745	367.158	651-48-9	12594	C04555	HMDB01032	2.5428	2.648	1.9391	2.197	2.5617	2.383	2.6952	0.8917	0.6463	0.9178	1.0069	2.1226	2.9131	0.5279	2.5622	3.975	6.4871	1.9152	0.8922	2.7628	0.8523	0.8194	1.2343	1.2071	2.1056	0.9931	0.5218	0.1673	1	0.3518	1.0014	0.885	0.2172	1.845	1.7895	3.0807	0.8116
1247	deoxycarnitine	Lipid	Carnitine Metabolism	36747	LC/MS Pos	100001662	742.4	146.118	6249-56-5	134	C01181	HMDB01161	0.4621	0.7291	0.5327	1.5366	0.803	2.6346	0.8222	0.4819	1.2398	0.5463	0.6623	0.4349	1.8827	0.3296	0.5225	1.9349	1.0783	0.8509	0.6495	0.8336	1.3796	0.7287	0.9357	1.2688	1.3522	1.2886	1.2842	1.4452	1.1446	1.1294	1	1.0716	1.5197	0.7753	1.9103	1.1899	0.7367
1851	deoxycholate	Lipid	Secondary Bile Acid Metabolism	1114	LC/MS Neg	302	5294	391.285	83-44-3	222528	C04483	HMDB00626	0.1835	0.1835	1.4658	2.5022	0.8632	0.1835	3.7509	2.2929	0.1835	0.1835	0.5359	0.1835	0.2434	0.1835	0.473	0.1835	0.1835	0.6302	0.1835	0.1835	0.1835	0.1835	0.5734	0.1835	0.1835	1.3731	0.4324	0.1835	0.1835	7.9292	0.1835	0.1835	0.1835	0.1835	0.1835	0.1835	0.7874
3231	desmethylnaproxen sulfate	Xenobiotics	Drug	46106	LC/MS Neg	100001788	2276	295.028		184679			0.1122	4.8337	0.1122	0.1122	0.1122	0.1122	0.1122	0.1122	0.1122	0.1122	0.1122	0.1122	0.1122	0.1122	1	0.1122	0.1122	0.1122	0.1122	0.9567	2.1626	0.1122	0.1122	0.1122	0.1838	0.1122	0.1122	0.1122	0.1122	0.1122	0.1122	0.1122	0.1122	0.1122	0.1122	0.1122	0.1122
1065	dihomo-linoleate (20:2n6)	Lipid	Polyunsaturated Fatty Acid (n3 and n6)	17805	LC/MS Neg	1231	5730	307.264	2091-39-6	6439848	C16525	HMDB05060	0.4102	0.4231	0.6899	0.2471	0.589	0.3298	0.3582	1.1205	0.4377	0.7975	0.5066	0.2519	0.1683	0.161	0.3154	0.1998	0.0899	0.5526	0.5605	2.6021	4.4979	2.5551	0.8536	1.3146	1.3678	0.8616	2.3586	1.8202	2.354	1.9131	0.8416	0.9941	1.04	1.0059	2.158	0.2874	0.5078
1060	dihomo-linolenate (20:3n3 or n6)	Lipid	Polyunsaturated Fatty Acid (n3 and n6)	35718	LC/MS Neg	100001739	5596	305.249	17046-59-2	5280581	C03242	HMDB02925	1.2385	1	1.5877	0.5467	0.4741	0.4676	0.7721	0.7894	0.6523	1.3765	0.7073	0.4121	0.2077	0.239	0.5096	0.1799	0.1204	0.4738	0.3528	3.1041	7.4333	1.5776	1.3665	1.0511	1.5866	0.9489	1.7086	2.7142	3.5725	1.7958	0.6832	1.3005	1.4255	0.6841	0.5499	0.4489	0.2696
2629	dihydrobiopterin	Cofactors and Vitamins	Tetrahydrobiopterin Metabolism	35129	LC/MS Pos	100001506	1515	240.109	6779-87-9	1879	C00268	HMDB00038	0.2559	0.2559	0.4042	0.2559	0.5091	0.2559	0.2559	0.2559	0.2559	0.2559	0.2559	0.2559	0.2559	0.2559	0.2559	0.2559	0.2559	0.2559	0.2559	2.0107	1.7893	7.528	1.2838	0.8336	0.692	1.0958	2.6035	0.2559	0.9157	2.8825	1.3174	0.5755	0.9131	0.2559	6.0028	0.6536	0.2559
805	dihydroxyacetone phosphate (DHAP)	Carbohydrate	Glycolysis, Gluconeogenesis, and Pyruvate Metabolism	15522	LC/MS Neg	309	603	168.991	102783-56-2	668	C00111	HMDB01473	2.4822	2.44	2.161	0.4956	1.2316	0.0995	1.8065	3.3317	3.9978	1.4611	1.2995	0.8464	0.9685	0.7689	1.2758	2.2182	0.9108	0.704	1.1819	2.2425	1.1835	1.0019	1.3708	0.6688	0.921	0.5394	1.7778	0.9981	1.4677	2.1008	0.6038	0.5404	0.2586	0.8242	1	1.2738	0.8829
3485	dimethyl sulfone	Xenobiotics	Chemical	43424	LC/MS Pos	100004284	1035	95.0161	67-71-0	6213	C11142	HMDB04983	0.3904	1.8389	1.0245	0.3904	0.3904	0.3904	1.5822	1	0.3904	0.3904	0.3904	0.3904	0.9999	0.3904	0.4903	0.3904	0.3904	0.3904	0.3904	0.3904	0.3904	2.0519	0.3904	0.9778	0.3904	2.1504	0.3904	0.3904	0.3904	0.8352	0.3904	0.3904	0.3904	0.7626	0.3904	0.3904	0.9728
336	dimethylarginine (SDMA + ADMA)	Amino Acid	Urea cycle; Arginine and Proline Metabolism	36808	LC/MS Pos	100001810	810	203.15	102783-24-4	123831	C03626	HMDB01539	0.4483	2.0331	0.9738	0.7669	1.2216	0.3325	0.5007	2.295	1.4087	0.5429	1.2993	0.6306	0.2674	0.2596	0.2088	0.2863	0.1529	0.4607	0.3978	3.4676	4.5574	2.0486	1.4143	0.6158	1.8432	1.2596	4.5608	5.2083	4.9659	3.7799	0.6818	0.4421	1	0.7372	0.7105	0.4407	0.6633
5	dimethylglycine	Amino Acid	Glycine, Serine and Threonine Metabolism	5086	GC/MS	806	1030	57.9	1118-68-9	673	C01026	HMDB00092	0.7743	0.7709	1.0403	0.5745	1.1541	0.819	0.6317	0.7901	1.0249	1.3816	0.6752	1.3915	1.4766	1.8363	0.5226	1.2094	0.7549	1.0732	2.3726	0.8549	0.9182	1.0998	1.0351	1.1766	0.9379	0.8141	0.6266	1.1619	1.983	0.8756	1.3115	1.0507	2.8703	0.9183	0.9845	0.8948	0.8885
3237	diphenhydramine	Xenobiotics	Drug	38669	LC/MS Pos	100002732	3863	256.17	147-24-0	3100	C06960	HMDB01927	0.0586	0.0586	0.0586	0.0586	0.3896	0.9673	0.0586	0.0586	0.0586	8.4659	6.699	0.0586	0.0586	0.6668	0.0586	0.0586	0.0586	0.0586	1	0.0586	0.0586	0.0586	0.0586	0.479	1.0327	0.0586	0.0586	0.0586	3.9829	10.5264	0.0586	0.9375	4.552	0.0586	0.2272	0.0586	0.0586
1064	docosadienoate (22:2n6)	Lipid	Polyunsaturated Fatty Acid (n3 and n6)	32415	LC/MS Neg	100001182	6034	335.296	7370-49-2	5282807	C16533	HMDB61714	0.2107	0.5281	0.433	0.2032	0.4081	0.2438	0.2207	0.9214	0.244	0.8537	0.3248	0.223	0.0951	0.1229	0.1764	0.3372	0.0497	0.4336	0.8414	2.3783	7.6187	3.2724	0.9724	1.0462	1.8205	1.2227	2.2083	1.8468	4.3073	2.6106	2.7354	0.9538	0.7996	0.896	4.5973	0.4473	0.7005
1052	docosahexaenoate (DHA; 22:6n3)	Lipid	Polyunsaturated Fatty Acid (n3 and n6)	44675	LC/MS Neg	100000665	5525	327.233	6217-54-5	445580	C06429	HMDB02183	1.3458	0.986	1.8334	0.7715	0.6509	0.3565	0.4807	1.2368	0.7665	1	0.7071	0.2433	0.279	0.406	0.7199	0.1774	0.1569	0.9098	0.6028	2.1363	3.5668	1.9305	1.6049	1.0535	1.147	0.6	2.8941	1.81	1.6604	1.6864	0.2965	0.9936	1.4993	0.9084	0.6265	0.5089	0.487
1051	docosapentaenoate (n3 DPA; 22:5n3)	Lipid	Polyunsaturated Fatty Acid (n3 and n6)	32504	LC/MS Neg	100001181	5571	329.249	2234-74-4	6441454	C16513	HMDB01976	0.6374	0.5814	1.0869	0.5195	0.5474	0.4355	0.2659	1	0.5094	1.0787	0.5409	0.1516	0.2063	0.1581	0.3878	0.1122	0.1251	0.8102	0.6229	2.6137	4.4787	2.7338	1.2268	1.0598	1.1504	0.5074	2.2618	1.3272	1.3971	1.6948	0.2309	1.2018	1.3694	0.9402	0.5506	0.4104	0.3673
1063	docosapentaenoate (n6 DPA; 22:5n6)	Lipid	Polyunsaturated Fatty Acid (n3 and n6)	37478	LC/MS Neg	100001580	5624.5	329.249	25182-74-5	6441454	C16513	HMDB01976	0.4878	0.5799	0.8698	0.5221	0.5657	0.5968	0.977	0.5527	0.5604	1.2441	0.7679	0.361	0.3316	0.2242	0.2338	0.1166	0.1903	0.3228	0.576	3.0279	7.182	2.0837	1.6185	1.6922	2.6675	2.0342	2.5107	4.7977	4.0971	3.7156	1.8854	0.9578	0.9986	1.7357	0.4624	0.404	0.2024
1053	docosatrienoate (22:3n3)	Lipid	Polyunsaturated Fatty Acid (n3 and n6)	32417	LC/MS Neg	100001195	5823	333.28	59708-86-0	5312556	C16534	HMDB02823	0.4142	0.4045	0.7624	0.3186	0.4758	0.2931	0.4517	0.4888	0.3909	0.528	0.5101	0.1749	0.0931	0.0598	0.1301	0.0719	0.0598	0.2061	0.4547	7.7102	13.736	3.5757	1.6001	0.7648	0.8954	1.8286	1.8538	7.0937	4.756	2.9969	3.6594	0.9305	0.8328	2.8088	1.1539	0.4531	0.227
1148	dodecanedioate	Lipid	Fatty Acid, Dicarboxylate	32388	LC/MS Neg	100001102	2990	229.145	693-23-2	12736	C02678	HMDB00623	1.5168	4.3751	5.1722	4.6714	0.9849	0.9958	2.9889	1.0381	0.994	1.0217	1.306	5.1453	0.7891	0.3796	2.3642	0.6413	1.137	0.9343	0.6853	1.7217	1.2441	0.6241	1.4308	0.8285	1.1906	1.69	0.8166	0.7839	0.6923	1.1022	2.5939	0.5493	0.7412	2.2884	0.9805	0.7697	0.558
3487	ectoine	Xenobiotics	Chemical	35651	LC/MS Pos	100001635	823	143.082	96702-03-3	126041	C06231		0.3301	0.9627	0.9422	0.3301	0.3301	1.9704	2.2223	0.3301	2.5875	0.3301	0.3301	1.5814	1.8944	0.3301	0.3301	2.8712	0.8378	0.3301	1.3341	0.9843	0.3301	0.7	0.7325	0.852	0.3301	3.0151	0.3301	2.5559	0.5317	0.8976	5.2613	0.9429	0.3301	0.3301	0.9283	0.8397	2.1286
1050	eicosapentaenoate (EPA; 20:5n3)	Lipid	Polyunsaturated Fatty Acid (n3 and n6)	18467	LC/MS Neg	2050	5450	301.217	10-2005-9;10417-94-4	446284	C06428	HMDB01999	1.2833	0.8768	2.3038	1.6256	0.5217	0.4847	0.2653	1.225	0.545	0.9427	0.503	0.1593	0.2935	0.2929	1.0097	0.1874	0.2789	1.8137	0.5913	2.2321	3.692	1.424	2.2718	0.7046	0.6467	0.3104	1.7182	1.7823	1.3019	1.023	0.2014	0.9903	1	0.92	0.3218	0.6835	0.5192
1036	eicosenoate (20:1)	Lipid	Long Chain Fatty Acid	33587	LC/MS Neg	100001335	5950	309.28		5282768		HMDB02231	0.3738	0.4811	0.595	0.3109	0.5311	0.3488	0.265	0.8592	0.3317	1.0442	0.4384	0.2565	0.2079	0.1835	0.2085	0.2471	0.0932	0.4917	0.6547	2.8678	4.8711	1.9831	0.8243	1.4118	1.2513	0.8213	1.6037	0.9382	2.5739	1.4489	1.557	0.9339	1.062	1.0846	1.3522	0.2921	0.5979
1769	epiandrosterone sulfate	Lipid	Steroid	33973	LC/MS Neg	100001287	4855	369.174	22229-22-7		C07635	HMDB00365	0.7329	1.9054	1.1872	2.0989	0.3757	1.7224	4.9685	0.2521	0.1899	0.2071	2.5133	1.9905	0.1311	0.1311	3.8451	1.4886	1.1189	1.088	0.3581	0.6857	0.382	0.1311	1.0062	0.1311	1.8584	1.5767	0.1311	0.1311	0.2956	0.809	0.6151	0.1311	0.1311	3.0683	0.8221	0.2833	0.1311
2940	ergothioneine	Xenobiotics	Food Component/Plant	37459	LC/MS Pos	100002154	823	230.096	58511-63-0	3032311	C05570	HMDB03045	0.1427	0.4768	0.3844	1.3622	0.7666	0.6575	1.4603	3.9716	0.6824	0.1903	0.4535	0.2114	1.3974	0.0447	0.2303	1.4867	0.6145	0.5133	0.3595	0.4843	2.0821	0.8518	1.6678	1.2997	1.02	3.1024	7.2159	0.716	0.7071	2.1908	0.5134	1.1217	1.1119	1.2009	7.0645	2.3976	0.3938
1040	erucate (22:1n9)	Lipid	Long Chain Fatty Acid	1552	LC/MS Neg	1087	6355.6	337.311	112-86-7	5281116	C08316	HMDB02068	0.2371	0.3178	0.526	0.4461	0.4368	0.1742	0.1806	0.8939	0.2402	0.582	0.316	0.1801	0.12	0.1466	0.3132	0.2054	0.1144	0.3937	0.7628	3.568	3.9367	1.6143	1	1.745	0.8378	0.801	1.6833	1.4898	2.9301	1.1723	2.8451	0.8277	0.9785	1.7003	1.0214	0.3843	0.7504
2942	erythritol	Xenobiotics	Food Component/Plant	20699	GC/MS	100000846	1517.5	217	149-32-6	222285	C00503	HMDB02994	0.4297	0.73	0.7084	0.6273	1.3725	0.854	0.468	0.5403	0.9769	1	0.6688	0.6365	1.3707	0.9473	0.7154	1.0545	0.4168	0.5862	0.8076	0.8395	2.4747	1.1197	0.9642	2.4949	0.7641	0.937	0.8088	1.0231	1.0373	1.0632	0.9977	2.4163	3.2434	1.8065	1.1525	0.8503	1.283
972	erythronate*	Carbohydrate	Aminosugar Metabolism	42420	LC/MS Polar	100001320	2186	135.03	88759-55-1	2781043		HMDB00613	0.3687	0.7995	0.7509	0.5317	1.0577	0.4256	0.4294	0.4952	0.7272	0.755	0.4744	0.5005	0.601	0.4303	0.5853	0.932	0.3372	0.5646	0.4809	1.157	2.0106	0.9561	0.978	1.2805	0.9882	1.0792	1.4826	1.309	0.8807	0.8882	0.9033	1.1756	2.1693	1.3685	1.3923	0.7856	1.1834
1423	ethanolamine	Lipid	Phospholipid Metabolism	1497	GC/MS	420	1304	174.1	141-43-5	700	C00189	HMDB00149	0.1256	0.2451	0.4596	0.1062	0.6511	0.1648	0.1438	0.3662	0.3498	0.4142	0.2497	0.0849	0.3562	0.0831	0.1737	0.2216	0.1731	0.2684	0.3504	1.0615	1.1614	1.4219	0.5432	1.4074	1.1003	1.1974	1.3459	0.8106	1.7928	1.2345	0.6211	1.0974	2.5648	1.0337	1.1002	0.452	0.3236
277	ethylmalonate	Amino Acid	Leucine, Isoleucine and Valine Metabolism	15765	LC/MS Polar	2054	2785	131.035	601-75-2	11756		HMDB00622	0.6796	1.1967	3.6293	0.7018	0.9808	1.6968	0.6966	0.8626	1.5415	2.3666	0.884	1	1.0645	0.8674	1.0192	2.4233	1.4432	0.932	0.3729	1.3306	1.4028	0.5249	0.6998	3.3009	2.0671	0.9804	1.2194	2.4345	0.7366	0.8051	3.8414	2.0727	1.9317	0.7977	0.8771	0.8286	0.8325
2592	flavin adenine dinucleotide (FAD)	Cofactors and Vitamins	Riboflavin Metabolism	2134	LC/MS Neg	327	2425	784.15	146-14-5;84366-81-4	643975	C00016	HMDB01248	0.7831	0.58	0.966	0.7209	0.9632	0.721	0.5032	0.6303	0.6173	1.0205	0.6379	0.7132	0.9268	0.4781	0.918	1.0457	0.9982	0.7907	0.3544	1.3946	1.325	1.4891	1	1.0018	1.0628	1.696	1.4237	0.9372	0.907	1.0663	1.0362	1.0654	1.4252	1.2321	1.3902	1.7529	0.9238
2593	flavin mononucleotide (FMN)	Cofactors and Vitamins	Riboflavin Metabolism	15797	LC/MS Neg	100000251	2390	455.097	130-40-5	710	C00061	HMDB01520	0.8453	0.3357	1.1008	0.919	1.1219	0.5788	0.7367	1.7199	0.3357	1.7049	1.2669	1.4991	0.8173	0.3357	1.0309	0.6908	0.3357	0.3357	0.3357	1.4332	1	1.2991	0.863	0.3357	0.754	0.9691	2.1048	0.5358	1.464	1.0697	1.4892	0.6683	0.9287	1.1163	1.5032	1.1604	0.5959
900	fructose	Carbohydrate	Fructose, Mannose and Galactose Metabolism	48195	LC/MS Polar	878	2022.2	225.062	57-48-7	5984	C00095	HMDB00660	0.8111	1.2359	1.5663	0.7564	1.6615	6.8667	0.8595	0.8649	1.6284	1.6394	0.6967	1	3.4695	0.4231	0.8557	1.3296	0.8436	0.5153	0.7721	4.0461	4.1891	2.08	0.2659	3.1643	1.035	0.3752	2.2017	0.5864	1.076	3.6368	0.1354	2.9245	3.9589	0.5651	0.5578	0.0845	0.0845
901	fructose 1-phosphate	Carbohydrate	Fructose, Mannose and Galactose Metabolism	15909	GC/MS	100000253	1983.1	445.2	53823-70-4	65246	C01094	HMDB01076	0.626	1.1141	2.263	0.2844	1	0.0791	0.3093	1.3131	4.6134	1.784	1.8253	0.0791	0.8357	0.0791	0.7548	0.2372	0.3129	0.0791	0.2201	8.5248	2.6264	2.3993	0.0791	2.7824	0.3334	0.5221	4.48	0.0791	1.5638	7.4901	0.135	1.693	0.0791	0.3905	0.7568	0.5896	0.3146
800	fructose-6-phosphate	Carbohydrate	Glycolysis, Gluconeogenesis, and Pyruvate Metabolism	12021	GC/MS	1232	1994.9	315.1	103213-47-4	69507	C05345	HMDB00124	0.4114	0.9795	1.0514	0.1375	0.4923	3.6492	0.648	1.0819	0.714	1.2923	0.6013	0.1896	1.3627	0.0496	0.5462	0.4001	0.1493	0.0693	0.5844	2.0732	2.7489	1.2021	0.1396	2.6577	0.5688	0.61	1.8571	1.0996	1	3.5531	0.0587	1.8934	3.6172	0.6701	0.13	0.0866	0.0496
850	fucose	Carbohydrate	Pentose Metabolism	15821	GC/MS	918	1682.2	204	2438-80-4	19466	C01018	HMDB00174	0.8752	0.6763	3.4078	0.2979	1.2613	0.4865	0.5746	0.5444	1.1659	3.826	1.0794	0.1403	0.6871	0.58	0.8823	0.3543	0.2448	0.6295	0.4528	1.3188	1.6071	2.039	0.5466	1.2049	1.7283	2.0058	1.2262	1.4367	1	1.6677	0.692	0.8792	1.5707	0.7642	1.7946	0.5898	0.7801
988	fumarate	Energy	TCA Cycle	1643	LC/MS Polar	330	3084	115.004	100-17-8	444972	C00122	HMDB00134	1.2892	0.6855	1.4323	0.9669	1.0787	1.6163	0.8046	0.7119	1.6575	2.4576	0.7768	0.4234	1.2295	0.4201	0.9474	1.4101	0.6477	1.2895	0.5805	1.1179	0.8974	1.088	1.1385	0.7756	1.225	1.2201	1.0466	1.2111	0.7372	1.2082	0.7774	0.8089	0.4391	0.8752	1.5159	1.0436	1.8441
924	galactonate	Carbohydrate	Fructose, Mannose and Galactose Metabolism	27719	LC/MS Polar	100001026	3085	195.051	299-28-5	128869	C00880	HMDB00565	0.0476	0.1905	0.2164	0.158	0.6436	0.3451	0.1092	0.0476	0.4152	0.0476	0.2978	0.1293	0.3412	0.0535	0.1266	0.2171	0.0476	0.1696	0.4326	0.5936	1.1127	4.3594	0.8375	1.701	1.1348	1.1752	1.6159	1.3671	2.0038	1.4342	0.6691	1.7854	0.9489	1.7844	3.2042	1.4342	2.4749
917	galactose 1-phosphate	Carbohydrate	Fructose, Mannose and Galactose Metabolism	15706	LC/MS Polar	100000300	4552	259.022	19046-60-7	123912	C00446	HMDB00645	0.2975	0.8484	0.4877	0.6174	0.5774	0.1606	0.4961	0.7661	0.7184	0.9246	0.4531	0.2966	0.9016	0.1606	0.3367	0.8841	0.468	0.7608	0.2427	1.3463	1.4139	1.877	1.03	2.1269	1.2855	0.7977	2.8027	0.6148	1.5227	1.3682	0.8539	2.0398	4.0139	1.7299	1.2805	1.1736	0.97
43	gamma-aminobutyrate (GABA)	Amino Acid	Glutamate Metabolism	1416	GC/MS	141	1539.7	304.1	56-12-2	119	C00334	HMDB00112	2.7875	1.1837	2.6711	0.3424	0.7766	0.2678	0.2755	1.4373	0.6102	1.661	0.6472	0.251	0.3717	0.2302	0.5473	0.7468	0.3062	0.4795	0.2004	1.994	0.6632	1.4346	0.8585	0.9469	1.1825	1.097	1.4303	2.5367	1.5784	2.4238	0.2923	0.6353	0.5857	1.4723	1.3894	1.3991	1.3122
393	gamma-glutamylalanine	Peptide	Gamma-glutamyl Amino Acid	37063	LC/MS Pos	100001843	1116	219.098	5875-41-2	440103		HMDB29142	0.1827	0.9879	0.3956	1.3596	1.0741	0.5549	1.1342	0.438	1.1397	0.7867	0.4536	0.8006	1.1488	0.2793	0.5951	1.6513	0.5853	1	0.5465	1.84	1.9056	1.1363	1.3209	0.1827	1.8314	1.384	1.5508	1	1.0183	0.7007	0.9507	0.376	0.3616	1.9419	3.153	1.2495	1.2465
394	gamma-glutamylcysteine	Peptide	Gamma-glutamyl Amino Acid	1778	LC/MS Pos	1036	1263.5	251.07	636-58-8	842	C00669	HMDB01049	0.1572	0.1572	0.3066	1.564	0.5589	0.9589	0.5956	0.1572	0.3346	0.7437	0.1572	2.6661	1.716	0.5727	0.294	1.3087	0.9954	1.2046	0.3765	1.1895	11.3174	1.4932	0.8878	1.6498	2.8915	0.5816	1.0411	0.618	0.7228	1.07	1.067	2.891	1.8284	1.8726	2.8298	2.0076	0.6829
395	gamma-glutamylglutamate	Peptide	Gamma-glutamyl Amino Acid	36738	LC/MS Pos	331	1045	277.103	1116-22-9	92865	C05282	HMDB11737	0.6748	1	0.8466	0.4621	0.5936	0.0406	0.6137	1.5583	0.8358	0.6992	1.7039	0.3621	0.2743	0.1445	0.3854	0.3615	0.1328	0.1779	0.4197	1.041	1.1441	1.2149	0.8772	0.8519	1.2004	1.0399	1.8415	2.396	3.2975	2.0243	0.4893	1.0188	0.6324	1.7208	1.8897	1.3745	0.8498
396	gamma-glutamylglutamine	Peptide	Gamma-glutamyl Amino Acid	2730	LC/MS Pos	1140	817.9	276.119	10148-81-9	150914	C05283	HMDB11738	0.1613	1.4721	0.5159	3.2312	1.6918	0.7299	2.1074	0.4681	0.8987	0.4984	0.6509	2.6822	1.6929	0.6622	0.8457	1.6262	1.0912	1.5416	0.7645	1.0021	2.2127	0.9677	0.7535	0.7446	2.0222	1.3935	1.016	0.4817	0.8792	0.5986	0.7581	0.8638	1.0426	1.9277	2.9732	1.1947	1
399	gamma-glutamylisoleucine*	Peptide	Gamma-glutamyl Amino Acid	34456	LC/MS Pos	100001485	2661	261.144		14253342		HMDB11170	0.1098	0.639	0.9898	0.1098	0.4029	0.1098	0.1098	0.8057	0.8642	0.9755	0.7672	0.1098	0.1749	0.1098	0.1098	0.2948	0.1098	0.1743	0.1098	3.6272	4.4952	3.9532	1.041	0.882	1.7234	1.278	4.0972	5.4856	3.2692	3.2402	0.5208	0.6925	0.6198	1.0102	1.6287	0.5246	1
400	gamma-glutamylleucine	Peptide	Gamma-glutamyl Amino Acid	18369	LC/MS Pos	1268	2757.2	261.144	2566-39-4	151023		HMDB11171	0.7948	1.0164	1.5753	0.4706	0.7641	0.201	0.405	1.3702	1.3703	1.1972	1.3781	0.2334	0.4269	0.0272	0.3672	0.3617	0.1879	0.3555	0.2638	3.5375	3.6701	3.5421	1	0.9238	1.2316	1.3193	3.4377	4.8482	3.1118	3.8121	0.5086	0.7793	0.4993	1.1357	1.1306	0.5775	0.8209
402	gamma-glutamylmethionine	Peptide	Gamma-glutamyl Amino Acid	44872	LC/MS Pos	100001313	2016.5	279.101	17663-87-5	7009567		HMDB29155	0.0959	0.6647	0.3031	0.7819	0.6731	0.0959	0.7484	0.4131	0.8307	0.2694	0.5467	0.3829	0.3225	0.0959	0.3712	0.141	0.0959	0.4917	0.4198	2.7032	3.576	1.9804	1.0781	0.7963	1.8312	1.6778	2.1907	1.3833	1.2615	1.041	0.5488	0.8863	0.3706	2.0341	1.5593	0.4796	0.5537
403	gamma-glutamylphenylalanine	Peptide	Gamma-glutamyl Amino Acid	33422	LC/MS Pos	100000491	2865	295.129	7432-24-8	111299		HMDB00594	0.5256	0.8097	1.2374	0.3675	0.6776	0.1364	0.3831	1.0232	1.13	1.5976	1.0742	0.1672	0.3715	0.0989	0.3184	0.1898	0.128	0.3334	0.2327	3.5839	4.1024	3.2325	1.0375	0.8348	1.4543	1.4898	2.9804	4.513	2.4838	2.9281	0.559	0.6196	0.5054	1.0742	1.086	0.5816	0.8444
404	gamma-glutamylthreonine*	Peptide	Gamma-glutamyl Amino Acid	33364	LC/MS Pos	100001314	996.6	249.108	5652-48-2			HMDB29159	0.0952	0.7658	0.905	0.4913	0.5035	0.0952	0.6846	0.9257	1.5661	0.9694	1.2015	0.3306	0.2383	0.0952	0.2156	0.4474	0.0952	0.4208	0.0952	4.4452	4.5963	3.4857	1.293	0.8813	1.635	1.5325	2.8471	5.0749	2.6531	2.5773	0.6873	0.6414	0.2792	1.1644	1.908	0.5601	0.8153
406	gamma-glutamyltyrosine	Peptide	Gamma-glutamyl Amino Acid	2734	LC/MS Neg	1102	1240	309.109	7432-23-7	94340		HMDB11741	0.6453	0.7419	1.0459	0.3486	0.8082	0.126	0.5537	1.0018	1.2271	1.9297	1.7494	0.262	0.3594	0.1246	0.3708	0.2599	0.1448	0.3017	0.3845	3.4165	2.7947	3.6008	1.3196	0.7081	1.5369	1.5208	2.7897	3.978	2.11	3.5902	0.4173	0.8625	0.4403	1.3448	1.4011	0.6913	0.6664
407	gamma-glutamylvaline	Peptide	Gamma-glutamyl Amino Acid	43829	LC/MS Pos	100001126	2045	247.129	2746-34-1	7015683		HMDB11172	0.396	0.8366	1.1954	0.4461	0.5826	0.2321	0.3265	0.8811	1.0909	0.7132	0.9319	0.2345	0.5053	0.1481	0.2869	0.7302	0.247	0.3063	0.1481	3.4727	3.583	3.6029	1.0163	1.1436	1.3575	1.2048	3.3006	4.6315	2.8328	3.114	0.669	0.7968	0.5256	1.3901	1.7305	0.9363	1.0811
2874	gluconate	Xenobiotics	Food Component/Plant	587	LC/MS Polar	338	2922	195.051	527-07-1	10690	C00257	HMDB00625	0.4558	0.7772	0.3007	0.3775	0.5785	0.9733	0.1873	7.6623	0.3436	1.3087	0.5297	0.2821	0.2737	0.1873	0.3399	0.325	0.193	0.4071	0.5544	1	2.2499	5.289	0.4465	3.6688	1	0.4576	2.7911	0.5885	2.3719	1.1222	0.5285	1.6756	4.2523	0.8212	0.3883	1.1014	1.1787
945	glucosamine-6-phosphate	Carbohydrate	Aminosugar Metabolism	580	LC/MS Polar	290	4521.5	258.038	3616-42-0	439217	C00352	HMDB01254	0.1152	0.4259	0.6589	0.1597	0.3049	4.7773	0.4986	0.9172	0.2143	1.5471	0.5765	0.1615	1.2402	0.0799	0.3172	0.8589	0.3629	0.1481	0.3461	1.8121	3.8838	0.9124	0.1806	2.6932	1	0.7198	3.0691	1.4211	1.5343	2.0951	0.0869	1.2867	3.6434	0.9981	0.2474	0.0799	0.1016
796	glucose	Carbohydrate	Glycolysis, Gluconeogenesis, and Pyruvate Metabolism	48152	LC/MS Polar	572	2342	225.062	50-99-7	79025	C00031	HMDB00122	4.4933	4.7458	1.2923	2.7403	0.5695	4.0093	1.0125	2.286	2.1095	1.5817	2.1736	2.3066	1.923	0.7481	2.5319	1.3482	0.5654	0.8318	0.5479	2.7126	2.9009	1.3999	0.3904	0.965	0.5584	0.4347	1	0.2622	0.7785	1.443	0.3949	1.04	1.6493	0.2704	0.1157	0.0784	0.0465
797	glucose 6-phosphate	Carbohydrate	Glycolysis, Gluconeogenesis, and Pyruvate Metabolism	31260	LC/MS Polar	291	4537	259.022	103192-55-8	5958	C00668	HMDB01401	0.1249	0.5738	1.0335	0.2898	0.4646	4.813	0.6114	1.1377	0.2993	1.7478	0.8005	0.2481	1.444	0.0274	0.3632	0.8652	0.5243	0.2391	0.403	1.3895	3.6367	0.8921	0.3496	3.4951	1.0663	0.5939	2.1749	1.0975	1.6125	1.921	0.1815	1.3831	2.8423	1.0956	0.3274	0.1204	0.1925
949	glucuronate	Carbohydrate	Aminosugar Metabolism	15443	LC/MS Polar	100000257	3233.3	193.035	207300-70-7	444791	C00191	HMDB00127	0.6011	1.1856	1.0377	0.5811	1.4623	0.3589	0.6138	0.7502	0.6433	0.4023	0.6016	0.654	0.7985	0.8083	0.6046	0.2924	0.4927	0.9547	1.0366	1.1444	1.365	1.2479	0.6494	2.5064	1	0.9254	1.0129	0.7292	1.827	1.1963	0.8329	1.6652	0.9158	1.1541	1.4552	0.6072	1.4569
943	glucuronate 1-phosphate*	Carbohydrate	Nucleotide Sugar	52312	LC/MS Neg	100001585	560	273.002	13168-11-1		C04037,C01195,C05385	HMDB03976	1.6781	2.4562	2.0156	0.6976	0.7301	0.1175	0.9558	2.0434	1.4256	2.2226	1.5044	1.3078	0.1665	0.4892	1.2047	0.2625	0.1015	0.3765	0.248	2.065	3.7815	0.8787	1.2685	0.714	0.6485	1.0442	4.9771	1.9672	1.7927	2.224	0.9286	0.8574	0.8286	2.4469	0.8591	0.5006	0.3195
38	glutamate	Amino Acid	Glutamate Metabolism	57	LC/MS Pos	561	710	148.06	56-86-0	611	C00025	HMDB00148	0.2526	0.3966	0.4377	0.289	0.4916	0.2159	0.3239	0.6109	0.5676	0.7444	0.5029	0.2807	0.2389	0.1437	0.2616	0.4729	0.1874	0.4041	0.3606	1.1981	1.6146	1.3377	1	1.3398	1.0172	0.8866	1.7506	1.5926	1.3415	1.1903	0.6435	1.3498	1.4389	0.9959	1.7041	1.2284	1.4801
48	glutamate, gamma-methyl ester	Amino Acid	Glutamate Metabolism	33487	LC/MS Pos	100001103	1068.8	162.076	1499-55-4	68662			0.0765	0.1026	0.2181	0.1873	1.2237	0.2102	0.391	0.0606	0.3536	0.1327	0.0777	0.4325	0.7862	0.1129	0.6108	1.1616	0.8745	1	0.2683	0.8442	1.6312	1.2587	1.6744	1.9358	1.0553	1.4404	0.2781	0.4832	0.1061	0.1986	1.5875	2.1632	1.6979	2.4903	2.2071	3.1396	2.0506
39	glutamine	Amino Acid	Glutamate Metabolism	53	LC/MS Pos	563	680	147.076	56-85-9	5961	C00064	HMDB00641	0.8344	1	1.1055	1.1753	1.3042	1.4872	0.9808	1.1413	1.2027	1.2271	1.0608	0.9128	1.6019	0.5188	0.8381	1.5721	1.0192	1.1786	0.58	1.0447	1.2027	1.5171	0.7439	0.7931	0.986	1.1649	1.4555	1.0378	0.9999	1.3503	0.5977	0.8194	0.9393	0.8928	1.6421	0.6344	1.425
522	glutamine-leucine	Peptide	Dipeptide	42994	LC/MS Pos	100003160	2195	260.16					0.1081	0.1081	0.165	0.1081	0.5646	1	0.1081	0.1081	0.3131	0.1081	0.1081	0.1081	0.709	2.1141	3.8987	0.1081	0.1081	1.4077	0.1081	1	4.971	1.2076	0.5468	3.0489	0.7463	1.2995	1.0558	1.1175	0.1081	0.1603	1.5545	3.7929	18.6763	1.0088	0.6303	0.1688	1.3709
83	glutarylcarnitine (C5)	Amino Acid	Lysine Metabolism	44664	LC/MS Pos	100001593	1583.3	276.144	102636-82-8	71464488		HMDB13130	0.8812	2.6078	0.6773	2.0586	2.9136	1.4111	1.5723	1.4492	2.6263	1.516	3.0618	1.9613	3.9655	4.631	1.4695	3.329	0.7623	1.8792	1.1745	0.697	0.9802	0.3809	0.8266	1.3172	1.0182	1.0992	0.5178	0.5811	0.9317	1.8052	1.0559	1.2245	1.1185	0.9644	1	0.4215	0.5436
378	glutathione, oxidized (GSSG)	Amino Acid	Glutathione Metabolism	38783	LC/MS Pos	448	1512	307.083	103239-24-3	65359	C00127	HMDB03337	0.0034	0.042	0.0104	0.6759	1.0596	0.8747	1.2666	0.0034	0.0423	0.0034	0.0051	1.3436	0.734	0.2454	1.4103	1.0013	0.9974	0.5365	0.4554	0.2651	0.6967	1.9326	1.7275	1.085	0.7879	2.0262	0.0034	0.0051	0.0034	0.0034	1.1992	0.5138	1.1045	1.7399	1.251	0.7288	0.9712
377	glutathione, reduced (GSH)	Amino Acid	Glutathione Metabolism	2127	LC/MS Pos	496	1270	308.091	70-18-8	124886	C00051	HMDB00125	0.0066	0.0125	0.0329	0.3854	0.7555	0.999	0.281	0.0017	0.0331	0.0107	0.0035	0.8394	1.8222	0.2077	0.2716	2.9649	1.6737	1.1967	0.1953	0.1104	1.7127	1.2445	1.9742	3.6881	1	2.2484	0.0115	0.0151	0.0105	0.0026	3.5866	3.9593	4.2695	5.8259	5.8912	2.9768	3.7675
816	glycerate	Carbohydrate	Glycolysis, Gluconeogenesis, and Pyruvate Metabolism	1572	LC/MS Polar	1052	2070.4	105.019	600-19-1	752	C00258	HMDB00139	0.9731	1.3938	1.8867	0.7409	0.7233	0.9901	0.5467	1.1661	1.2306	1.6364	0.5457	0.4499	0.8627	0.4112	0.7055	1	0.6287	1.0449	0.5896	1.8186	1.3199	1.6904	0.5361	1.0908	0.9571	0.6011	1.6138	1.8912	1.8315	1.0073	0.462	0.9927	1.1549	0.5828	0.6687	0.306	0.4237
1594	glycerol	Lipid	Glycerolipid Metabolism	15122	LC/MS Neg	1254	758	91.0401	56-81-5	753	C00116	HMDB00131	0.7912	0.7148	1.4888	0.7048	0.3346	3.1093	0.6798	0.5298	1.0718	2.4393	0.6994	0.374	0.7956	0.263	0.8654	1.5906	0.8191	0.8547	0.2224	1.3187	2.4251	1.4122	0.594	0.931	2.1262	0.9754	1.1047	0.9035	1.5804	1.198	0.7063	0.954	1.6369	0.8404	1.2994	0.5225	0.349
1595	glycerol 3-phosphate	Lipid	Glycerolipid Metabolism	43847	LC/MS Polar	100000258	3938.7	171.006	29849-82-9	754	C00093	HMDB00126	1.2946	0.6452	0.8367	68.0049	1.4075	2.739	4.2072	0.6877	1.0724	1.0472	1.5913	24.9427	103.52	12.3838	11.2889	253.792	214.925	8.8319	1.2126	0.4677	0.7009	0.1969	1.0885	1.8342	0.8907	0.7534	0.5425	2.4105	0.8702	0.5501	14.974	6.862	0.4325	0.9276	8.4436	5.9069	2.7931
1426	glycerophosphoethanolamine	Lipid	Phospholipid Metabolism	37455	LC/MS Pos	100001620	705	216.063	33049-08-0	123874	C01233	HMDB00114	0.3782	0.5247	0.9037	1.2719	0.9836	2.8182	0.8491	0.5406	0.8461	1.1847	0.3491	0.8553	2.4755	0.5415	0.8099	1.0952	0.8812	1.5177	0.4327	1.6456	5.6521	2.1083	0.7592	2.6539	1.8382	0.9305	1.9746	0.4487	0.5051	0.822	3.3368	2.9465	23.0174	1.0164	1	1.7212	0.7738
1600	glycerophosphoglycerol	Lipid	Glycerolipid Metabolism	48857	LC/MS Polar	100001619	2430	245.043		439964	C03274		0.3973	0.3729	0.6079	0.2402	0.7597	0.3436	0.2224	0.405	0.9373	1.1443	0.3353	0.1442	0.4919	0.1716	0.3262	0.3523	0.2593	0.3821	0.2341	1.461	3.6166	1.5703	1.0412	1.4288	1.2527	1.2517	1.9855	0.9091	0.9378	1.2904	1.607	1.6909	4.558	0.9026	0.9712	0.8865	0.7266
1428	glycerophosphoinositol*	Lipid	Phospholipid Metabolism	47155	LC/MS Polar	100001621	3850	333.059	16824-65-0				0.1962	0.2121	0.5873	0.168	0.4941	0.3872	0.2307	0.2167	0.316	1.0296	0.2106	0.1193	0.3164	0.2551	0.5185	0.3799	0.2105	0.277	0.2815	0.9487	1.5802	1.3617	1.1918	1.2697	1.9164	1.491	0.9759	1.5354	0.9526	0.7528	1	1.3621	2.8199	1.7861	3.316	0.711	1.2818
1420	glycerophosphorylcholine (GPC)	Lipid	Phospholipid Metabolism	15990	LC/MS Pos	100000269	709.9	258.11	28319-77-9	71920	C00670	HMDB00086	0.228	0.6919	0.8756	2.0585	0.9336	4.4729	0.7726	0.5685	1.3228	1.4679	0.324	0.982	3.1658	1	0.7828	1.8915	0.9897	1.7405	0.4928	1.9804	4.9896	1.8224	0.5275	1.9011	1.6636	0.6895	2.0319	0.3705	0.3402	0.4996	3.3161	2.2827	17.0486	0.7971	0.8447	1.8667	0.6941
1	glycine	Amino Acid	Glycine, Serine and Threonine Metabolism	58	LC/MS Pos	340	700	263.147	56-40-6	750	C00037	HMDB00123	0.7984	1.0166	0.9979	0.6137	0.7465	0.4349	0.5818	1.2321	0.8617	1.1033	0.9628	0.5251	0.5339	0.6821	0.7024	0.4471	0.3038	0.5384	1.0211	1.5331	1.5594	1.4186	1.5858	1.0687	1.1938	0.8983	1.1529	1.3708	1.3652	1.3015	0.9504	1.1742	0.727	1.2856	0.9187	0.8367	0.787
1844	glycochenodeoxycholate	Lipid	Primary Bile Acid Metabolism	32346	LC/MS Neg	1628	5236.1	448.307	16564-43-5	12544	C05466	HMDB00637	1.5159	0.5765	0.9878	1.089	5.5665	0.6985	3.4216	0.911	0.4326	0.7122	6.4059	4.0664	2.4078	5.2236	0.6485	0.3258	0.1827	15.7217	7.4342	0.4034	0.1827	0.1827	0.4299	1.9356	0.5385	0.8288	0.5811	0.1827	1.4876	0.7614	2.1747	2.8756	2.5454	0.2832	0.1827	0.1827	11.3913
1841	glycocholate	Lipid	Primary Bile Acid Metabolism	18476	LC/MS Neg	342	5163	464.302	475-31-0;863-57-0	10140	C01921	HMDB00138	0.1577	0.1577	0.1577	0.1577	4.8114	0.1577	1.4361	0.6586	0.1577	0.4177	2.2883	0.6433	2.2211	5.5803	0.3576	0.1577	0.1577	50.8921	6.1959	0.1577	0.1577	0.1577	0.1577	1.675	0.2437	0.5627	1.3818	0.1577	0.8039	0.367	1.3224	2.0881	2.6972	0.1577	0.1577	0.1577	24.2314
1880	glycocholenate sulfate*	Lipid	Secondary Bile Acid Metabolism	32599	LC/MS Neg	100001989	4750	254.623					0.8407	1.193	3.9159	1.3879	2.8867	1.1462	4.0487	1.3088	1.0998	0.8774	3.9149	1.7203	2.608	0.1471	0.4481	1.1099	0.8413	4.3588	0.4284	0.9865	0.2605	1.0135	0.3385	1.2611	2.064	1.4977	0.3923	0.1471	1.0132	1.4148	0.4994	1.7195	0.1471	0.5208	0.7732	0.4423	0.9868
1852	glycodeoxycholate	Lipid	Secondary Bile Acid Metabolism	18477	LC/MS Neg	100000436	5281	448.307	360-65-6	3035026	C05464	HMDB00631	0.0405	0.0405	2.0223	0.8366	0.0405	0.3524	6.2	1.649	0.0405	0.5149	0.0405	0.0405	0.8517	0.0405	0.7179	0.0405	0.0974	32.023	2.0663	0.2507	0.0405	0.0405	0.8897	0.342	0.8781	2.6045	1.3362	0.0405	1.1884	0.7146	1.6816	0.0405	0.0405	0.4515	0.0405	0.0405	22.9651
1858	glycolithocholate sulfate*	Lipid	Secondary Bile Acid Metabolism	32620	LC/MS Neg	100001657	5011	255.631	15324-64-8	72222	C11301	HMDB02639	0.5853	0.6295	4.5205	1.4053	1.4767	1.4896	8.1697	1.5763	0.2487	0.2487	1.8019	0.4365	1	0.2487	1.0259	0.2487	0.3309	1.9267	0.2487	0.4395	0.2487	1.2284	0.8607	0.4001	1.3061	2.2979	0.3955	0.2487	0.2487	0.3239	0.2487	0.2487	0.2487	0.5296	0.2487	0.2487	1
1863	glycoursodeoxycholate	Lipid	Secondary Bile Acid Metabolism	39379	LC/MS Neg	100002911	5033	448.307	64480-66-6	12310288		HMDB00708	0.3951	0.3951	0.3951	0.3951	3.0199	0.3951	0.9768	0.968	0.3951	0.4885	0.3951	1.3843	1.0232	0.3951	0.3951	0.4384	0.3951	5.1394	0.3951	0.3951	0.3951	0.3951	0.3951	0.5449	0.3951	0.3951	0.3951	0.3951	1.0294	0.3951	0.6223	1.5254	0.3951	0.3951	0.3951	0.3951	3.0037
534	glycylisoleucine	Peptide	Dipeptide	36659	LC/MS Pos	100001790	2080	189.123	19461-38-2	88079		HMDB28844	0.0399	0.1031	0.1519	0.4842	0.9214	0.702	0.351	0.0399	0.8934	0.2551	0.2457	0.1184	0.4564	0.0854	0.4319	0.2516	0.0399	1.245	0.185	1.3848	8.022	2.9858	1.2845	1.8169	1.7586	2.2001	1.3986	1.0786	0.5088	0.4461	2.4789	2.0687	2.6395	1.9697	1.7246	1.5883	1.1211
535	glycylleucine	Peptide	Dipeptide	34398	LC/MS Pos	100001258	2190.9	189.123	869-19-2	92843	C02155	HMDB00759	0.0294	0.1738	0.189	0.515	1.48	0.8525	0.2706	0.0625	0.952	0.2743	0.153	0.0729	0.6456	0.1023	0.2682	0.1894	0.1155	1.0755	0.3166	2.2909	10.0869	4.2093	1.225	3.263	2.0487	1.6292	1.2659	0.7949	0.661	0.4873	1.2554	3.7944	2.4202	2.64	1	0.7689	0.6553
545	glycylvaline	Peptide	Dipeptide	18357	LC/MS Pos	100000487	1561.6	175.108	1963-21-9	97417		HMDB28854	0.0393	0.4853	0.3366	1.0677	1	0.7147	0.5113	0.0945	2.0574	0.2561	0.4593	0.3361	0.3796	0.0393	0.3474	0.1594	0.0635	0.9908	0.383	2.747	8.7468	2.9355	1.4907	1.2974	1.6663	2.0562	2.7282	1.175	0.5093	0.5079	3.6345	1.4648	1.9238	1.6865	1.2494	0.5155	0.7819
359	guanidinoacetate	Amino Acid	Creatine Metabolism	43802	LC/MS Pos	344	711.2	118.061	352-97-6	763	C00581	HMDB00128	3.7445	2.6361	5.3815	0.4338	1.9998	0.1696	1	5.3168	0.7025	2.5189	1.1248	1.4508	0.2368	3.0872	2.815	1	0.2097	0.2453	0.1696	2.7162	0.6851	2.0425	4.829	0.1725	2.5754	3.3728	2.0254	2.87	0.6222	2.1673	0.3313	0.1696	0.5765	0.4872	0.2295	0.8596	0.1696
2485	guanine	Nucleotide	Purine Metabolism, Guanine containing	32352	LC/MS Pos	172	1035	152.057	73-40-5	764	C00242	HMDB00132	0.0562	0.1807	0.0294	0.3759	1.82	0.0683	0.2692	0.0566	2.6311	1.1168	0.1239	1.0275	0.1884	0.4753	0.2983	1.1087	0.087	0.5182	0.5866	0.0589	0.3403	0.0117	0.1764	2.1674	0.6067	0.1828	1.1317	5.2454	3.1633	2.6701	1	1.6294	4.3699	0.0884	5.7004	1.4134	1.542
2484	guanosine	Nucleotide	Purine Metabolism, Guanine containing	1573	LC/MS Pos	1099	1680	284.099	118-00-3	6802	C00387	HMDB00133	0.3479	0.7445	0.3485	0.5376	1.7129	1	0.575	0.4963	1.7326	0.7162	0.5121	0.9962	0.726	0.7485	0.9071	1.1734	0.5884	1.5673	0.5402	1.0587	1.6642	0.2482	1.2213	1.7591	0.8129	0.9413	0.4922	1.3591	0.3309	0.7002	1.0219	1.4148	2.8051	1.116	3.9626	1.6576	1.1972
2502	guanosine 2'-monophosphate (2'-GMP)*	Nucleotide	Purine Metabolism, Guanine containing	52442	LC/MS Neg	100002733	1241	362.051		444571			3.6132	32.5739	5.8495	6.4143	3.3497	0.5919	5.6763	27.7873	26.6482	0.6792	16.8263	18.6247	1.1291	0.3243	0.8488	4.7067	2.4089	10.8862	0.2349	4.8468	3.0418	1.168	1	0.5655	1.4317	0.9244	2.1712	0.7113	0.517	1.9036	0.0417	0.6817	1.3206	0.1013	0.5838	0.6169	3.2953
2480	guanosine 3'-monophosphate (3'-GMP)	Nucleotide	Purine Metabolism, Guanine containing	39786	LC/MS Neg	100002704	773.9	362.051	117-68-0	3522			0.3423	2.3321	1.4619	0.7494	0.454	0.2742	0.6126	3.0233	1.5987	0.4898	1.2229	0.3367	0.0697	0.2681	0.0815	0.0582	0.0582	1.6126	0.702	7.665	5.8618	1.6314	0.9031	0.4803	5.89	5.2402	9.7507	0.9538	3.586	5.4008	0.1486	0.5259	0.8529	0.1598	1.2987	0.5625	0.4482
2479	guanosine 5'- monophosphate (5'-GMP)	Nucleotide	Purine Metabolism, Guanine containing	2849	LC/MS Pos	347	1300	364.065	5550-12-09	6804	C00144	HMDB01397	0.0362	0.0362	0.0362	0.0362	0.0362	0.0362	0.0362	0.0362	0.0362	0.0362	0.0362	0.2059	1.387	0.0362	0.0362	2.2167	1.1331	0.2367	0.0362	0.0362	0.0362	0.0362	0.1022	0.2058	0.0362	0.0362	0.0362	0.0362	0.0362	0.0362	1	0.3728	3.7609	0.0362	0.0362	0.8669	6.1503
935	guanosine 5'-diphospho-fucose	Carbohydrate	Nucleotide Sugar	15903	LC/MS Neg	335	755	588.075	15839-70-0				0.2903	0.2903	0.2903	0.2903	0.5348	0.2903	0.2903	0.2903	0.2903	0.2903	0.2903	0.2903	0.2903	0.2903	0.2903	0.2903	0.2903	0.2903	0.2903	0.2903	0.2903	0.2903	0.4709	0.2903	0.2903	1	0.2903	0.2903	0.2903	0.2903	0.6816	0.2903	0.5268	0.2903	1.333	2.2575	1.676
2607	gulonic acid*	Cofactors and Vitamins	Ascorbate and Aldarate Metabolism	46957	LC/MS Polar	100001586	2750	195.051	20246-53-1	9794176			0.1001	0.2103	0.3273	0.2634	0.5819	0.27	0.2457	0.2205	0.433	0.3854	0.278	0.2545	0.3305	0.138	0.2444	0.2771	0.1116	0.4913	0.1768	1.9024	2.4411	3.7326	1	2.3808	2.2192	0.9491	1.9921	1.5559	1.3798	0.7309	0.8987	2.2854	1.9575	1.344	6.4223	1.0376	5.4458
2642	heme	Cofactors and Vitamins	Hemoglobin and Porphyrin Metabolism	41754	LC/MS Pos	100001386	5003	616.176	14875-96-8	26945	C00032	HMDB03178	0.1781	0.3921	0.1781	1.2907	0.1781	0.1781	0.7794	1	3.9447	0.1781	3.508	4.3655	0.1781	0.4313	0.9131	0.4856	1.0869	0.1781	0.1781	0.1781	0.1781	0.1781	0.1781	0.1781	0.1781	0.1781	0.1781	0.1781	1.0219	0.1781	0.1781	0.1781	0.1781	0.1781	0.1781	0.1781	0.1781
1005	heptanoate (7:0)	Lipid	Medium Chain Fatty Acid	1644	LC/MS Neg	925	3670	129.092	111-14-8	8094	C17714	HMDB00666	1.1195	1.1814	1.1184	1.1817	0.8819	1.1273	0.945	0.8602	0.9116	1.1941	0.8352	1.7835	0.7984	0.7418	1.0286	0.8858	1.5501	0.9342	2.9235	1.4212	0.5631	0.9456	0.9879	0.9368	0.7691	0.989	1.3034	1.2261	1.1534	0.8972	0.8164	1.0336	1.0315	0.8318	1.5881	1.011	1.4858
1232	hexanoylcarnitine	Lipid	Fatty Acid Metabolism(Acyl Carnitine)	32328	LC/MS Pos	100000781	3194	260.186	6920-35-0	6426853		HMDB00705	0.5126	0.8854	1.7192	1.2254	0.9827	14.3617	2.1321	0.8806	1.3435	0.4929	0.6913	1	3.3323	0.3829	0.3619	10.2358	9.1201	2.512	0.928	0.2902	0.4385	0.2993	0.7254	1.9671	2.3956	1.4761	0.9239	0.5111	0.7956	1.0389	2.0934	1.5355	2.5286	0.6851	1.1827	1.3471	1.2358
1221	hexanoylglycine	Lipid	Fatty Acid Metabolism(Acyl Glycine)	35436	LC/MS Neg	100001527	2900	172.098	24003-67-6	99463		HMDB00701	1.0948	2.3264	1.9063	1.7655	1.3673	0.6246	1	0.4204	0.9471	1.0829	1.6592	0.9419	0.5622	0.4204	0.4204	0.7403	0.8547	0.4204	0.4204	1.678	0.9196	0.4204	1.0331	0.7323	1.1887	1.1559	0.4204	0.7351	0.4204	0.8071	0.9432	0.4204	0.4204	0.4204	0.4204	0.4204	0.4204
2671	hippurate	Xenobiotics	Benzoate Metabolism	15753	LC/MS Neg	100000014	2106.9	178.051	495-69-2	464	C01586	HMDB00714	1.0695	1.8638	1.8917	3.4892	0.9546	1.0089	2.4137	2.3793	6.4768	0.8038	0.5006	0.4128	0.7101	0.4857	0.933	2.08	0.4679	0.4112	0.5157	1.0431	0.9915	1.3109	2.5875	0.8351	1	1.5937	1.703	2.9951	0.8314	0.2128	0.2422	0.6637	0.3145	0.9569	1.9525	0.2853	0.3168
65	histamine	Amino Acid	Histidine Metabolism	1574	LC/MS Pos	354	579	112.087	51-45-6	774	C00388	HMDB00870	0.4996	1.5841	0.7296	2.0253	1.7554	0.8543	2.4767	1.1943	1.9733	0.1976	1.8368	3.2072	1.4852	0.4583	1.6497	1.4896	1.0231	2.9889	0.2666	1.1327	1.5255	1.1504	3.0758	1.1772	3.6203	1.8719	2.8161	2.6643	1.0738	0.512	1	0.8664	0.3001	4.7036	0.5384	0.846	0.2409
53	histidine	Amino Acid	Histidine Metabolism	59	LC/MS Neg	355	755.9	154.062	5934-29-2	6274	C00135	HMDB00177	0.9265	1.2601	1.1648	0.847	0.7389	1	0.9741	1.294	1.285	4.2718	1.1022	0.5898	0.6108	0.3349	0.7569	0.6697	0.3684	0.8459	0.6343	1.3762	1.8312	1.6755	0.9108	0.7434	1.2195	1.1466	2.1637	1.533	1.937	1.745	0.5573	0.7422	0.7821	0.7268	1.2344	0.7726	0.953
332	homocitrulline	Amino Acid	Urea cycle; Arginine and Proline Metabolism	22138	LC/MS Pos	100000963	821.7	190.119	1190-49-4	65072	C02427	HMDB00679	0.3691	0.7084	0.2833	1.0526	2.0755	2.0865	0.3111	0.4478	1.0386	2.1023	1.4591	0.6181	2.0004	1.8701	0.4769	0.9948	0.558	0.6866	1	0.673	1	1.0386	0.7869	2.4934	2.2618	0.4568	0.9605	0.4446	3.3063	1.3485	0.8172	2.2905	4.999	0.2143	1.409	1.3671	2.0501
2964	homostachydrine*	Xenobiotics	Food Component/Plant	33009	LC/MS Pos	100001550	1211	158.118	1195-94-4	441447	C08283	HMDB33433	0.3674	0.6784	0.8707	0.6411	0.9421	0.2477	0.8431	0.2477	3.6834	2.5155	1.749	1.3418	0.8548	0.2477	0.2477	0.5966	0.9495	0.2477	0.2477	0.998	1	1.6249	0.6303	0.8877	0.2477	0.8368	0.2477	4.3082	4.5281	2.2787	2.5555	1.3909	0.3335	0.6241	1.692	2.4601	0.2477
1230	hydroxybutyrylcarnitine*	Lipid	Fatty Acid Metabolism(Acyl Carnitine)	43264	LC/MS Pos	100003926	1477	248.149		53481617		HMDB13127	0.6244	0.9402	1.4986	2.5403	1.5069	15.3066	1.7097	1.8247	1.1287	0.8675	0.5893	0.5705	8.6232	0.3364	0.5877	9.4957	9.6628	3.6563	0.4426	0.4923	0.8931	1.1006	1	2.272	4.7059	1.3656	3.2541	0.3984	1.0249	0.7961	0.9849	2.2443	0.9035	1.3358	2.0654	2.0778	1.5701
2751	hydroxycotinine	Xenobiotics	Tobacco Metabolite	38661	LC/MS Pos	100002717	1275	193.097	34834-67-8	10219774		HMDB01390	0.3448	2.385	1.2874	0.8361	0.3448	1.2462	0.3448	0.3448	0.3448	0.3448	0.3448	0.8596	0.3448	0.3448	0.3448	0.3448	1	0.3448	0.3448	0.6337	1.6191	1.1474	0.7322	0.3448	1.2625	0.3448	0.3448	0.3448	0.3448	0.3448	0.8494	0.3448	0.3448	0.3448	0.3448	0.8623	0.3448
316	hypotaurine	Amino Acid	Methionine, Cysteine, SAM and Taurine Metabolism	590	LC/MS Pos	358	690	110.027	300-84-5	107812	C00519	HMDB00965	0.2108	1.3214	0.703	0.6762	0.4506	0.6621	0.5888	0.433	1.2553	0.8761	1.2202	0.3741	0.8275	0.2152	0.3718	1	0.8544	2.1953	0.5653	1.4336	2.2059	0.8629	2.0383	0.9332	0.7214	1.3305	1.4941	1.1216	1.2159	1.925	4.5436	1.1263	0.9474	1.6323	1.0602	1.9161	0.7257
2430	hypoxanthine	Nucleotide	Purine Metabolism, (Hypo)Xanthine/Inosine containing	3127	LC/MS Neg	171	1291.2	135.031	68-94-0	790	C00262	HMDB00157	0.353	0.7839	0.7158	0.8157	0.8067	0.9823	0.5308	0.9694	1.0292	1.5281	0.7242	0.3788	0.6013	0.234	0.4419	0.5166	0.3266	0.7894	0.5086	1.2669	1.7718	1.2674	1.2496	0.9905	1.5109	1.1989	1.7624	1.3139	0.9241	1.0337	0.7388	0.9198	1.6009	0.9808	1.593	1.0763	0.9179
64	imidazole lactate	Amino Acid	Histidine Metabolism	15716	LC/MS Pos	100000263	782.7	157.061	14403-45-3	440129	C05568	HMDB02320	0.22	0.3772	0.1002	0.2533	1.1824	0.4985	0.2972	0.1002	0.9998	0.5824	0.5083	0.3043	1.0064	0.4965	0.3426	0.7468	0.2917	0.1359	0.1817	2.7909	1.1564	0.633	1.4999	2.1831	0.9356	0.5261	0.4723	3.0709	1.3884	0.5848	2.6569	1.7452	2.1481	2.2839	0.8742	1.0002	2.5486
63	imidazole propionate	Amino Acid	Histidine Metabolism	40730	LC/MS Pos	100003434	1020	141.066	1074-59-5	70630		HMDB02271	0.2053	0.4895	1.0235	0.2161	1.4272	1.0626	0.6957	0.7623	1.2272	1	1.1733	0.2746	1.5144	0.201	1.6058	2.0188	1.7639	3.956	0.4013	1.3971	0.7235	1.2815	0.5054	6.7677	2.661	0.8063	1.7564	3.1546	1.2901	0.6368	3.0918	0.883	0.6768	1.819	1.0101	26.2722	30.5267
198	indoleacetate	Amino Acid	Tryptophan Metabolism	27513	LC/MS Pos	100001034	3766.3	176.071	6505-45-9	802	C00954	HMDB00197	0.2638	0.9422	8.3673	1.2115	1.9507	1.8285	2.1063	0.9326	3.7174	0.6672	1.2703	0.7287	1.7876	1.0764	1.0059	5.8657	1.0202	1.0989	0.8218	0.6414	0.5789	4.4827	1.2515	1.4366	2.3322	1.2233	0.7068	1.9397	1.0761	0.8728	1.1636	0.9736	0.6107	0.7248	0.5809	0.7055	0.7288
197	indolelactate	Amino Acid	Tryptophan Metabolism	18349	LC/MS Pos	100000463	3514	206.081	832-97-3	92904	C02043	HMDB00671	0.2862	1.2749	0.936	0.6034	1.5502	0.7865	0.9979	0.6936	2.0176	1	1.8487	0.7283	1.4401	0.3422	0.655	0.9343	0.8703	0.4736	0.6512	0.8129	0.8695	0.4393	1.0135	1.0021	1.2161	0.9456	0.788	2.5001	3.2318	1.0405	1.7618	0.9686	0.94	1.0584	0.4773	0.608	0.4486
200	indolepropionate	Amino Acid	Tryptophan Metabolism	32405	LC/MS Pos	100001083	4147.9	190.086	830-96-6	3744		HMDB02302	1.6403	1.1011	0.7964	1.5712	0.9728	0.2811	1	0.2811	2.935	0.2811	0.2811	0.2811	1.0068	0.2811	1.9839	0.8989	0.2811	0.4024	0.2811	0.8777	0.2811	0.2811	1.3117	0.4754	0.2811	0.2811	0.2811	0.2811	0.2811	0.2811	0.2811	0.2811	0.2811	1.1351	0.2811	0.2811	0.2811
2429	inosine	Nucleotide	Purine Metabolism, (Hypo)Xanthine/Inosine containing	1123	LC/MS Pos	361	1679.3	269.088	58-63-9	6021	C00294	HMDB00195	0.3405	0.4604	0.3857	1.4629	1.6165	3.5947	1.0226	0.2154	0.6146	0.7024	0.3582	0.9481	2.8616	0.8065	1.373	2.6856	2.8373	1.6945	0.6478	0.8868	1.6448	0.8419	1.2218	1.3934	0.7658	1.1546	0.2913	0.6171	0.1493	0.302	1.2592	1.3239	2.3358	1.5713	1.97	2.1806	1.3285
2428	inosine 5'-monophosphate (IMP)	Nucleotide	Purine Metabolism, (Hypo)Xanthine/Inosine containing	2133	LC/MS Polar	362	4267.7	347.04	4691-65-0	8582	C00130	HMDB00175	0.0578	0.0578	0.0578	2.3677	0.0578	2.9846	0.0578	0.0578	0.0578	0.0578	0.0578	1.5348	20.6296	0.0578	0.0578	44.8266	9.0255	0.4871	0.0578	0.0578	0.0578	0.0578	0.0578	0.0578	0.0578	0.0578	0.0578	0.0578	0.0578	0.0578	0.5656	0.0578	0.7263	0.0578	0.091	0.1531	4.4009
1398	inositol 1-phosphate (I1P)	Lipid	Inositol Metabolism	1481	GC/MS	370	2057.8	318.1	573-35-3;106032-59-1	440194	C04006	HMDB00213	0.6993	1	0.8577	0.6876	0.56	0.3591	0.4738	0.8145	1.0003	1.0552	0.7857	1.1731	0.5532	0.4241	0.5052	0.6447	0.4457	0.9853	0.2504	1.9645	1.1277	1.2248	0.9425	2.1375	1.2897	0.8446	1.4688	1.0582	0.8198	1.512	0.3642	1.433	1.1186	0.9465	0.6089	1.7182	1.8912
803	Isobar: fructose 1,6-diphosphate, glucose 1,6-diphosphate, myo-inositol 1,4 or 1,3-diphosphate	Carbohydrate	Glycolysis, Gluconeogenesis, and Pyruvate Metabolism	46896	LC/MS Neg	100002180	551	338.989					0.9581	2.4286	2.6573	0.216	0.6969	0.0786	1.2334	2.3002	8.5683	1.8497	0.9908	0.4888	1.2115	0.1223	1.3156	2.4401	1.1056	0.2175	0.352	9.3524	1.9971	1.572	1	0.6061	0.875	0.3963	5.8878	1.8087	1.5896	4.5325	0.1841	0.7648	0.1961	1.0684	1.0434	0.8029	0.6034
282	isobutyrylcarnitine	Amino Acid	Leucine, Isoleucine and Valine Metabolism	33441	LC/MS Pos	100001055	1955.1	232.154	25518-49-4	168379		HMDB00736	0.9609	0.9924	1.6703	3.771	0.9548	1.9917	0.6685	0.5762	1.2635	0.3633	1.9301	2.0588	5.026	0.9822	1.0745	8.2391	0.9909	1.8185	0.8196	1.0285	0.72	0.2958	1.986	0.5655	0.9104	1.0091	1	0.4454	1.6563	4.844	1.8868	0.7244	8.0828	1.4285	1.2057	0.6351	0.6025
983	isocitrate	Energy	TCA Cycle	12110	LC/MS Pos	1206	967.7	193.034	20226-99-7	1198	C00311	HMDB00193	0.0847	0.0847	0.0847	0.0847	0.369	0.0847	0.0847	0.261	0.0847	0.0847	0.0847	0.0847	0.0847	0.0847	0.2623	0.2024	0.0847	0.0847	0.0847	0.0847	2.0884	0.3149	2.0553	1.0032	0.4032	0.8892	1.4583	1.8592	0.0847	0.0847	0.3216	1.6859	6.2499	1.1584	1.2931	0.2426	0.0847
266	isoleucine	Amino Acid	Leucine, Isoleucine and Valine Metabolism	1125	LC/MS Pos	376	1599	132.102	73-32-5	6306	C00407	HMDB00172	0.6735	0.8568	1.0045	0.4936	0.8396	0.6487	0.5362	1.1104	1.0907	1	1.118	0.3283	0.4767	0.1547	0.4455	0.5084	0.1673	0.6788	0.4274	1.5822	1.878	1.3874	0.9127	1.1179	1.3334	1.1193	1.9613	1.8755	1.6936	1.663	0.833	0.9542	1.1759	1.0648	1.3309	0.6289	0.9996
569	isoleucylglycine	Peptide	Dipeptide	40008	LC/MS Pos	100003169	1740	189.123	868-28-0	342532			0.0301	0.2768	0.1914	1.2252	1.1229	1.359	0.3096	0.0761	0.8874	0.6346	0.1174	0.2007	0.4251	0.0921	0.4123	0.2579	0.1777	2.2121	0.1612	1.5309	14.596	4.704	1.3291	5.0678	3.2609	1.3114	2.1526	0.9329	0.6879	0.57	0.9229	3.873	3.7916	2.7184	1	0.6889	0.8814
243	isovalerate	Amino Acid	Leucine, Isoleucine and Valine Metabolism	44656	LC/MS Neg	100000708	1564	101.061	503-74-2	10430	C08262	HMDB00718	0.23	0.23	0.23	1.1717	0.9435	0.23	1	0.295	0.23	0.23	0.23	1.4675	0.23	0.23	0.8628	0.23	0.23	0.23	0.23	0.23	0.23	6.6375	0.23	0.23	0.23	0.23	0.23	2.2212	0.23	0.23	22.3816	0.23	0.23	0.23	0.23	0.23	0.23
245	isovalerylcarnitine	Amino Acid	Leucine, Isoleucine and Valine Metabolism	34407	LC/MS Pos	100001393	2504.9	246.17	31023-24-2	6426851		HMDB00688	0.7613	0.7733	0.3102	2.3731	2.248	1.0694	0.7609	0.5465	1.1391	0.7138	1.9568	3.3674	1.8581	0.9771	0.9727	2.1184	2.0749	6.3008	1.665	1.4941	0.6832	0.1291	0.645	1.2212	1.0041	1.5165	1.0637	1.0273	14.3594	7.6486	2.2767	0.435	0.8962	0.5712	1.4369	0.8016	0.9991
204	kynurenate	Amino Acid	Tryptophan Metabolism	1417	LC/MS Neg	98	2224	188.035	492-27-3	3845	C01717	HMDB00715	0.2396	0.4734	0.943	0.8525	1.2779	0.6725	1.2198	0.2396	0.6653	0.2859	0.9518	0.5214	1.3629	1.0538	0.9932	1.2101	0.7312	0.5351	0.985	0.7603	0.3789	1.0068	1	4.5153	1.3501	3.7858	1.8036	0.8122	1.0129	1.7687	4.5495	0.3927	1.2114	1.6856	3.7157	4.2195	0.2566
203	kynurenine	Amino Acid	Tryptophan Metabolism	15140	LC/MS Pos	100000265	1902.1	209.092	2922-83-0	161166	C00328	HMDB00684	0.0782	0.2224	0.4303	0.1371	0.9253	0.3223	0.2995	0.3866	0.1987	0.1691	0.2066	0.1521	0.4003	0.3673	0.3276	0.1236	0.1332	0.1702	1.2187	3.6426	1.0597	1.8818	1.4976	1.3952	2.3037	4.8041	3.4307	1.6461	1.8226	3.5509	1	1.0285	1.4465	1.194	6.231	2.4113	0.4367
813	lactate	Carbohydrate	Glycolysis, Gluconeogenesis, and Pyruvate Metabolism	527	LC/MS Neg	482	681.6	89.0244	79-33-4	612	C00186	HMDB00190	0.5569	0.8764	0.9902	0.7895	1.0439	1.3139	0.688	0.6023	1.1989	1	0.7007	0.4846	1.1555	0.561	0.4966	1.2359	0.8925	1.1414	0.7632	1.0529	1.4803	1.179	0.9042	1.2723	1.0463	0.9183	1.0009	0.7686	1.013	0.7252	0.83	1.2732	1.6057	0.9364	1.0527	1.1793	1.3129
1238	laurylcarnitine	Lipid	Fatty Acid Metabolism(Acyl Carnitine)	34534	LC/MS Pos	100001392	5070	344.28	25518-54-1	10427569		HMDB02250	0.1796	0.4375	0.253	0.97	0.8639	1.03	1.2402	0.4599	1.6954	0.1796	0.8256	1.9398	2.4413	0.3073	0.4678	2.274	1.6361	1.1329	0.8036	0.661	1.4416	0.1796	1.9894	0.8549	0.6225	1.6174	0.5083	3.2514	0.9254	0.9698	21.799	0.701	1.1846	2.1764	1.047	1.1952	0.5132
237	leucine	Amino Acid	Leucine, Isoleucine and Valine Metabolism	60	LC/MS Pos	397	1680.2	132.102	61-90-5	6106	C00123	HMDB00687	0.7341	0.9494	1.1022	0.5706	0.8808	0.6615	0.5538	1.0984	1.0747	1.1676	1.1008	0.3834	0.512	0.1751	0.526	0.4752	0.1896	0.7057	0.4264	1.5823	2.11	1.3537	0.9222	1.0713	1.1981	1.1087	1.9135	1.7239	1.5319	1.5565	0.7767	0.948	1.1124	0.9665	1.1717	0.6043	0.8499
748	leucylglutamine*	Peptide	Dipeptide	48189	LC/MS Pos	100003183	1578	260.161		4305457			0.1518	0.1518	0.1714	0.2843	0.4875	0.3877	0.1518	0.1518	0.225	0.229	0.1518	0.1518	0.7539	0.5767	2.3385	0.3307	0.1518	1.1074	0.3557	0.5636	3.5568	1.0779	1	3.2475	1.6942	1.5372	0.8405	0.9221	0.2411	0.2979	1.0175	4.5623	9.4309	2.4755	1.4851	1.4127	0.8789
587	leucylglycine	Peptide	Dipeptide	40045	LC/MS Pos	100003185	1805	189.123	686-50-0	79070			0.1154	0.3108	0.3812	0.5993	1.0129	1.9881	0.261	0.187	0.6178	0.6648	0.1505	0.2586	1.7313	0.5126	1.4685	0.9937	0.4761	2.3827	0.4425	0.8997	7.0884	1.8068	1	8.1773	1.9703	1.1875	1.1383	0.9871	0.5092	0.4992	1.2903	6.7285	11.7751	2.4365	0.9756	1.1718	1.3581
3277	lidocaine	Xenobiotics	Drug	35661	LC/MS Pos	100001538	2850	235.18	137-58-6	3676	D00358	HMDB14426	0.0682	0.277	6.2529	0.1808	0.0514	2.9199	0.1428	1.1758	15.7366	0.3864	1.2245	0.1056	0.117	0.0221	2.0852	9.1304	3.2547	46.373	0.198	0.0798	0.093	0.7824	0.0333	0.0221	2.5967	0.1078	1	6.6371	0.1811	1.3114	0.0221	0.0221	0.0221	1.4558	7.4978	2.9892	40.065
1056	linoleate (18:2n6)	Lipid	Polyunsaturated Fatty Acid (n3 and n6)	1105	LC/MS Neg	180	5535	279.233	60-33-3	5280450	C01595	HMDB00673	1.1269	1.0709	1.5598	0.7384	0.9577	0.932	1.0282	1.3912	1.2856	1.9689	1.3705	0.7271	0.5402	0.3835	0.8633	0.5916	0.2945	1.3618	0.7377	2.0159	1.9091	1.4508	0.7579	1.0576	1.0692	0.7098	1.5828	0.7245	1.5059	2.0139	0.5962	0.8377	1	0.5927	1.1685	0.4071	0.6804
1058	linolenate [alpha or gamma; (18:3n3 or 6)]	Lipid	Polyunsaturated Fatty Acid (n3 and n6)	34035	LC/MS Neg	100001337	5450	277.217		5280934	C06426	HMDB03073	1.5769	1.4252	1.6392	1.0297	0.6707	0.7414	1.0247	1	1.263	1.9682	1.2868	0.8697	0.4371	0.3372	0.7574	0.3272	0.2659	0.9666	1.1749	5.4962	4.8478	1.487	1.0117	0.8683	1.255	0.6626	1.2672	3.0879	2.7149	2.3453	0.6066	0.6517	0.9682	0.7223	0.6022	0.3341	0.3794
1243	linoleoylcarnitine*	Lipid	Fatty Acid Metabolism(Acyl Carnitine)	46223	LC/MS Pos	100003151	5190	424.342	36816-10-1	6450015		HMDB06469	0.5415	1.4962	0.1226	0.9374	2.5702	0.1491	0.6683	0.8469	10.4294	0.1226	3.316	4.3091	3.8245	0.3345	0.7449	6.849	0.5247	4.1112	0.7332	1.8247	1.0626	0.7198	0.9015	1.0241	0.4091	0.9052	1.1514	0.7073	0.9207	2.7495	2.1628	0.6515	2.5448	0.3979	1.1975	1.3731	0.1226
73	lysine	Amino Acid	Lysine Metabolism	1301	LC/MS Pos	407	613.8	147.113	56-87-1	5962	C00047	HMDB00182	0.8135	1.8431	1.5414	0.8754	0.9765	0.63	0.8566	1.9295	1.9259	1.6152	1.9225	0.6299	0.4819	0.175	0.5015	0.4194	0.2401	0.8318	0.3897	2.3661	2.3632	1.551	1	0.8468	1.2047	1.0906	3.8373	3.2191	2.5656	2.4905	0.5693	0.6772	0.9906	0.9284	0.7017	0.3962	0.7909
606	lysylleucine	Peptide	Dipeptide	40020	LC/MS Pos	100003196	1561	260.197	7369-79-1	4682588			0.0575	0.0575	0.0575	1.0119	1.0039	1.4196	0.0575	0.0575	0.9961	0.205	0.1708	0.0575	0.6509	0.0575	0.0575	0.0575	0.1865	2.0347	0.0575	1.9119	7.6308	3.335	1	1.5344	1.1458	1.4273	1.2514	0.8393	0.0575	0.2763	3.2412	1.858	13.3359	1.0202	0.3663	0.084	0.9763
989	malate	Energy	TCA Cycle	1303	LC/MS Polar	409	3343.1	133.014	6915-15-7	525	C00149	HMDB00156	1.2881	1.6592	1.4457	1.9391	1.0852	1.6403	0.7802	1.3425	1.7877	2.6996	0.9069	0.8504	1.1779	1.3441	0.9549	0.2801	0.6473	1.9671	0.5878	1.2943	0.1035	1.1488	0.9659	0.9113	1.1064	1.2716	1.0229	1.3877	0.8734	1.1919	0.7478	0.8368	0.1826	0.8709	0.5485	1.0577	1.1451
1198	malonylcarnitine	Lipid	Fatty Acid Synthesis	37059	LC/MS Pos	100001526	965	248.113	853728-01-5	22833583		HMDB02095	0.1725	0.1725	1.5768	3.3792	1	14.0377	0.4507	0.4649	3.2974	1	1.2376	0.1725	9.1203	0.1725	0.1725	7.1336	4.1446	3.0148	0.1725	0.1725	0.1725	1.1686	0.1725	0.1725	2.6257	1.3447	0.3986	2.3154	0.5683	0.8859	0.1725	0.4938	0.1725	0.7782	1.8642	1.5241	0.4042
856	maltohexaose	Carbohydrate	Glycogen Metabolism	35170	LC/MS Neg	100001448	1215.2	989.32	34620-77-4	439606	C01936	HMDB12253	3.9466	2.9729	1.3367	2.5757	1.0947	5.5407	0.4965	2.6602	2.9702	0.1598	5.362	0.8621	0.2225	0.3605	0.6429	0.1598	1.9636	4.8602	0.3178	4.8278	1.0444	0.5246	0.2637	0.1598	0.1598	0.1598	0.1598	0.1598	0.1598	0.7027	0.1598	4.4129	0.1598	0.1598	0.1598	0.1598	0.1598
858	maltopentaose	Carbohydrate	Glycogen Metabolism	35163	LC/MS Neg	100001447	1080.9	827.267	34620-76-3	13489094	C06218	HMDB12254	1.9922	0.9462	0.0641	3.8669	1.6599	9.8671	0.4562	0.3247	4.4948	0.6669	0.3706	2.129	3.5458	0.0641	0.1986	0.1527	1.0497	5.7792	0.8707	3.6723	5.5001	1.8131	0.0641	1.778	0.0641	0.1414	0.6522	0.0641	0.0641	0.7363	0.0641	2.0831	1.7054	0.0641	0.0641	0.0881	0.0641
864	maltose	Carbohydrate	Glycogen Metabolism	15586	LC/MS Polar	913	3329.4	387.114	6363-53-7	10991489	C00208	HMDB00163	4.0883	5.3576	1.3411	5.6899	1.6171	12.1045	0.6162	7.0733	3.8079	0.4005	8.8131	2.621	2.1178	2.0632	1.7392	2.7637	4.418	8.2502	0.5332	6.6292	3.5186	0.9073	1	1.9719	0.8907	0.054	0.6904	0.0482	0.2235	1.1184	0.4521	5.4997	1.1673	0.3848	0.257	0.5638	0.7012
859	maltotetraose	Carbohydrate	Glycogen Metabolism	15910	LC/MS Pos	100000275	960	667.229	34612-38-9	446495	C02052	HMDB01296	0.7219	1.0027	0.1706	0.1706	1.3063	6.3351	0.1706	0.1706	0.9432	0.7332	0.1706	0.9973	0.6829	0.1706	0.1706	0.1706	0.1706	4.4194	0.1706	3.8674	0.8134	0.1706	0.1706	1.0568	0.1706	0.1706	0.1706	0.1706	0.1706	0.1706	0.1706	1.6902	0.1706	0.1706	0.1706	0.1706	0.1706
861	maltotriose	Carbohydrate	Glycogen Metabolism	44688	LC/MS Neg	100000276	812	503.162	1109-28-0	439586	C01835	HMDB01262	8.6124	7.1926	1.0007	10.2876	3.4795	13.8612	0.9697	6.5251	3.686	0.0964	9.5705	4.1615	2.5829	3.3789	1.5875	2.7498	4.8811	9.8258	0.4666	9.8069	3.6085	0.9713	1	3.5422	0.7433	0.1241	0.4176	0.0465	0.1148	0.9993	0.536	7.4136	1.0575	0.5214	0.248	0.8194	0.8793
910	mannitol	Carbohydrate	Fructose, Mannose and Galactose Metabolism	15335	GC/MS	100000277	1839	319.1	69-65-8	6251	C00392	HMDB00765	0.2272	0.3641	0.4261	1.2048	0.7461	3.432	0.2272	14.4848	1.6993	0.6988	0.7892	0.6517	3.1656	11.022	0.5027	2.8324	269.221	2.4244	12.8145	0.2272	0.449	0.2272	0.7533	1.2259	0.688	0.6749	5.3932	0.2272	0.7743	1	1	0.9893	7.6582	1.0418	0.8148	177.663	1.9906
906	mannose	Carbohydrate	Fructose, Mannose and Galactose Metabolism	48153	LC/MS Polar	803	2200	225.062	3458-28-4	18950	C00159	HMDB00169	1.8968	2.0802	1.6615	0.9872	0.4303	7.6012	0.5704	2.3984	0.3733	2.6326	0.9217	0.9866	1.8476	0.7112	1.2859	0.9185	0.1265	0.2029	0.3747	1.2549	5.2463	1.2953	0.304	1.1322	1.0128	0.3093	3.595	1.0247	1.8469	3.2182	0.1854	1	2.7131	0.3947	0.0975	0.0393	0.0393
907	mannose-6-phosphate	Carbohydrate	Fructose, Mannose and Galactose Metabolism	1470	GC/MS	294	2035.9	387.2	70442-25-0;104872-94-8	439198	C00275	HMDB01078	0.3939	0.5545	0.877	0.1968	0.6378	4.1593	0.2068	1	0.3447	2.6378	0.7397	0.1236	2.2207	0.2282	0.4263	1.0536	0.4559	0.1773	0.3325	1.4805	3.2241	1.3236	0.2742	2.7942	0.8217	1.0502	2.3028	0.9106	1.0544	3.4169	0.1477	1.9647	4.6592	0.9498	0.3287	0.2996	0.3352
1020	margarate (17:0)	Lipid	Long Chain Fatty Acid	1121	LC/MS Neg	891	5731	269.249	506-12-7	10465		HMDB02259	1.0942	0.8848	1.6067	0.7122	0.7207	0.5693	0.6186	1	1.0304	1.7501	0.9036	0.6787	0.4482	0.4665	0.7602	1.0551	0.4153	0.8476	0.7504	1.7663	1.8743	1.5762	0.8893	0.9382	1.4659	1.1917	1.2082	0.8809	2.8421	1.0252	0.7928	0.8546	1.3781	1.0315	0.8933	0.4892	0.5422
290	methionine	Amino Acid	Methionine, Cysteine, SAM and Taurine Metabolism	1302	LC/MS Pos	415	1250	150.058	63-68-3	6137	C00073	HMDB00696	0.6855	1.115	1.0875	0.7288	0.9771	0.7097	0.6339	1.3842	1.3648	1	1.3435	0.4402	0.4086	0.2087	0.4622	0.2754	0.145	0.7833	0.465	2.2254	2.8636	1.7278	1.0419	1.0111	1.3695	1.4271	2.5825	2.6608	2.215	2.1051	0.584	0.8045	0.8793	0.9889	0.8439	0.3527	0.5514
294	methionine sulfone	Amino Acid	Methionine, Cysteine, SAM and Taurine Metabolism	44878	LC/MS Polar	100004635	1880	180.034	820-10-0	69961			0.2715	0.8731	0.2715	0.6412	1.0807	1.4251	0.2715	0.2715	0.2715	1.0824	0.2715	0.2715	1.1211	0.7517	0.2715	0.6805	0.2715	0.3908	0.4252	0.2715	1.6736	1.278	0.7324	0.2715	1.1393	0.2715	0.8371	0.2715	1.9281	0.8633	0.3861	1	2.1879	0.2715	1.2371	0.9821	1.7885
295	methionine sulfoxide	Amino Acid	Methionine, Cysteine, SAM and Taurine Metabolism	18374	LC/MS Pos	100000039	741.1	166.053	3226-65-1	158980	C02989	HMDB02005	1.0869	1.0322	1.2105	0.6531	0.7862	0.4621	0.5275	1.1486	1.1764	0.9287	1.1626	0.5485	0.5211	0.5567	0.4417	0.1243	0.1399	0.7452	0.9592	1.7549	1.7956	1.3038	0.8596	0.7495	1.068	1.5713	2.6305	2.1375	2.5204	1.7234	0.878	0.649	1.1148	0.616	0.6935	0.3004	0.6657
3070	methyl glucopyranoside (alpha + beta)	Xenobiotics	Food Component/Plant	46144	LC/MS Neg	100005864	1070	193.072					0.2228	0.2739	0.3022	0.5932	1.2114	1.8346	0.5143	0.4286	0.8042	0.3453	0.3915	0.1478	1.2222	0.402	0.4216	1	0.9463	7.8011	0.4299	2.9045	3.0002	1.3752	1.2236	4.3993	1.0958	0.4201	0.4472	0.1093	0.2421	0.2959	0.835	7.9928	10.4883	0.8127	1.0232	1.3131	3.148
1218	methylmalonate (MMA)	Lipid	Fatty Acid Metabolism (also BCAA Metabolism)	1496	LC/MS Polar	418	3078.4	117.019	516-05-2	487	C02170	HMDB00202	0.9984	1.0949	1.8374	0.6478	2.65	12.1094	1.6717	0.8572	1.3529	7.2759	0.8876	0.5018	5.0276	0.7026	3.4846	9.8595	0.7775	2.4489	0.5684	0.7361	1.5675	0.7197	0.5545	2.7613	3.1059	3.9444	0.8415	0.9701	1.0008	1.3153	0.3589	3.2271	2.8665	0.6464	1.2137	1.3009	3.7988
2564	methylphosphate	Nucleotide	Purine and Pyrimidine Metabolism	37070	LC/MS Neg	100001805	605	110.985	7023-27-0	13130		HMDB61711	0.5516	0.7028	0.8186	0.2824	0.8195	0.3826	0.746	0.761	0.7136	0.6871	0.4293	0.3422	0.6415	0.345	0.9603	0.6515	0.5235	0.7842	0.7256	1.0496	1.0636	1.6338	0.909	1.7137	1	0.9055	1.0344	0.843	1.106	1.089	1.1074	1.0552	3.1061	1.1076	1.5269	0.8015	0.7661
3530	MOPS	Xenobiotics	Chemical	47137	LC/MS Neg	100005863	1532	208.065	1132-61-2	70807;2723950			6.1168	1.9204	316.469	9.1224	7.8364	1.2843	1.3045	0.4352	0.1205	0.6268	114.763	1.438	0.2822	1.1359	0.1205	3.1125	0.6138	0.4524	0.3316	2.57	0.1662	0.7739	0.3347	8.4401	0.6829	3.7338	0.5951	0.1205	0.1205	0.2425	0.8918	0.1205	1.4103	0.5633	1.1765	0.5292	0.1205
1390	myo-inositol	Lipid	Inositol Metabolism	1124	LC/MS Polar	363	3506.3	225.062	87-89-8	892	C00137	HMDB00211	1.3356	0.7587	0.9348	0.8197	0.9093	0.8014	0.508	0.9914	0.9897	1.9354	0.6429	0.8921	1.3675	1.3588	1.1009	0.7906	0.4135	0.4653	0.5144	0.7561	1.124	0.82	0.6578	1.0912	1.4748	1.542	1.8052	1.1043	1.336	1.1736	0.6904	1.7967	1.4267	1.1277	1.0989	0.9777	0.4095
1014	myristate (14:0)	Lipid	Long Chain Fatty Acid	1365	LC/MS Neg	519	5440	227.202	544-63-8	11005	C06424	HMDB00806	0.9873	0.8211	0.8981	0.9644	0.6405	0.7384	0.9897	0.8757	0.9116	1.1943	1.0212	0.9457	0.4602	0.4948	0.6953	0.5579	0.4834	0.7526	0.655	3.3785	2.8497	1.328	0.9895	1.0325	1.1732	0.8637	1.063	1.7284	1.7361	1.3518	1.1588	0.6978	1.2175	0.8552	0.8613	0.6834	0.6815
1015	myristoleate (14:1n5)	Lipid	Long Chain Fatty Acid	32418	LC/MS Neg	100001198	5346.9	225.186	544-64-9	5281119	C08322	HMDB02000	0.9328	0.6713	0.815	1.1071	0.6177	0.721	1.0321	0.8133	0.7309	0.9813	1.2506	1.0682	0.4717	0.4341	0.5587	0.4492	0.4381	0.7689	1.1595	4.8508	4.4878	1.2071	1.9689	0.9118	0.9123	0.7374	1.0524	3.46	1.4887	1.5099	2.3185	0.6102	0.9667	0.9031	0.4913	0.4287	0.5498
1246	myristoleoylcarnitine*	Lipid	Fatty Acid Metabolism(Acyl Carnitine)	48182	LC/MS Pos	100006051	5120	370.295	889848-55-9				0.1219	0.4493	0.188	3.1941	1.1999	0.9692	0.7747	0.784	0.8234	0.1219	0.9813	1.5073	4.5453	0.2815	0.4994	4.5382	0.9067	3.0058	0.7255	0.2718	0.3453	0.1219	1.2377	1.3739	0.809	1.4089	0.4892	1.1298	1.0308	1.1785	12.1447	0.7245	1.1675	2.3193	1.5482	0.9147	0.5832
1239	myristoylcarnitine	Lipid	Fatty Acid Metabolism(Acyl Carnitine)	33952	LC/MS Pos	100001270	5142.1	372.311	18822-89-4	53477791		HMDB05066	0.1818	0.6991	0.1857	0.8206	0.7529	0.3468	0.5239	0.7298	1.1122	0.1818	0.8195	2.7019	0.6913	0.3951	0.5567	2.4565	0.6732	1.6166	0.4504	1.3561	1.3985	0.486	1.9982	1.3606	0.8308	1.2519	0.9442	2.6424	1.1212	0.9286	7.1503	0.6814	2.977	1.1391	1.0558	1.3492	0.5364
2582	N'-Methylnicotinamide	Cofactors and Vitamins	Nicotinate and Nicotinamide Metabolism	31465	LC/MS Pos	100001113	1595	137.071	114-33-0	64950		HMDB03152	3.6003	5.3461	7.0085	1.7187	0.323	2.2162	0.2398	0.2749	1	1	2.1715	1.7891	0.0617	0.3176	0.1037	0.0617	0.2108	0.0617	0.5273	11.8456	21.6121	7.2315	8.9956	0.3275	11.0785	1.0455	0.5262	2.4297	0.8289	9.1062	12.9528	0.0799	1.0361	0.3295	0.3197	3.1654	0.0637
367	N(1)-acetylspermine	Amino Acid	Polyamine Metabolism	32360	LC/MS Pos	1200	550	245.234	77928-70-2	916	C02567	HMDB01186	0.025	0.025	0.025	0.4244	0.4729	0.2566	0.1197	0.025	0.5134	0.0826	0.212	0.0583	0.1936	0.0838	0.025	0.025	0.1013	0.2282	0.7158	2.4803	1.1139	2.0854	2.6221	0.8726	0.6991	2.9366	0.1961	2.3852	0.3117	0.2539	4.4762	0.0287	2.5287	4.14	1.0554	0.55	0.9669
76	N-6-trimethyllysine	Amino Acid	Lysine Metabolism	1498	LC/MS Pos	189	690	189.16	23284-33-5	440120	C03793	HMDB01325	0.619	1.3795	1.0831	0.7022	0.8823	0.5854	0.5733	2.1984	1.7513	0.5808	1.7456	0.6838	0.6981	0.2539	0.4269	0.6595	0.3702	0.6024	0.4701	1.8	2.0332	1.0731	1.2342	0.7059	1	1.0448	3.6416	4.4149	2.1457	2.2111	0.8311	0.6887	1.3819	1.0112	0.9102	0.5551	1.1981
42	N-acetyl-aspartyl-glutamate (NAAG)	Amino Acid	Glutamate Metabolism	35665	LC/MS Pos	100001612	1575.4	305.098	3106-85-2	5255	C12270	HMDB01067	0.7748	1.1027	0.791	2.0941	0.8683	2.9523	1.9538	1.1346	0.6479	2.7893	2.488	7.911	1.7147	0.2314	1.629	0.8682	1.2332	0.6922	0.3485	3.4513	0.9096	0.481	0.6359	0.4278	5.8071	0.7788	3.1515	3.0988	2.5308	1.2311	0.126	4.5744	1.5401	0.8444	0.9716	0.4647	0.126
2535	N-acetyl-beta-alanine	Nucleotide	Pyrimidine Metabolism, Uracil containing	37432	LC/MS Pos	100002102	1471	132.066	3025-95-4	76406	C01073		0.1899	1.0033	0.6481	0.5197	3.0099	0.3511	1.1702	1.0933	1.0203	0.2502	1.1675	0.7498	1.1874	0.7664	0.5402	0.6542	0.2857	0.6384	0.9928	1.3994	1.6624	1.0207	1.4058	0.6878	0.7226	1.2573	1.4442	2.8798	0.5666	1.6133	1.284	0.4836	1.8031	0.9601	2.1791	0.4669	1.3112
954	N-acetyl-glucosamine 1-phosphate	Carbohydrate	Aminosugar Metabolism	15741	LC/MS Polar	1212	4052	300.049	31281-59-1	440364	C04256	HMDB01367	0.0893	0.3366	0.3014	0.473	1.4192	0.5384	0.3549	0.377	0.573	1	0.2344	0.5837	0.3616	0.627	0.4142	0.4497	0.0893	0.7329	0.4727	1.6769	2.8031	1.7346	2.2524	3.4216	0.741	1.1869	1.2614	0.5268	0.4431	0.4159	1.1048	2.2107	2.4873	2.0126	1.5744	0.9501	2.3237
26	N-acetylalanine	Amino Acid	Alanine and Aspartate Metabolism	1585	LC/MS Neg	1110	861.2	130.051	97-69-8	88064	C02847	HMDB00766	0.5769	0.8264	0.9313	0.7716	1.1634	0.4149	0.5127	1.2062	1.317	0.6867	1.6255	0.4897	0.3807	0.2736	0.3228	0.3312	0.1975	0.5219	0.4306	2.0531	2.3277	1.7214	1.3465	0.8996	1.0908	1.3888	2.5295	2.1389	2.3035	2.0773	0.771	0.6755	1.0709	1.0464	1	0.4503	0.8126
32	N-acetylaspartate (NAA)	Amino Acid	Alanine and Aspartate Metabolism	22185	LC/MS Pos	100000787	1222.4	176.055	997-55-7;997-55-7	65065	C01042	HMDB00812	0.0517	0.1169	0.2655	0.4405	0.6861	0.4708	0.6267	0.0811	0.3581	1.7793	0.1568	0.9259	0.3491	0.1846	0.569	0.3185	0.3781	0.5123	0.2932	2.3736	1.5253	0.5934	2.638	0.9395	1.5391	1.0098	2.2418	1.871	2.2065	0.9902	0.6206	2.2521	1.825	1.9463	1.2546	0.5239	0.3894
410	N-acetylcarnosine	Peptide	Dipeptide Derivative	43488	LC/MS Neg	100004046	1235	267.11	56353-15-2	9903482		HMDB12881	1.3415	1.4033	1.0746	9.9897	1.837	24.3769	2.3548	0.1736	1.3615	0.2966	1.582	0.8641	11.2466	0.1736	1.5404	17.3343	14.358	3.1277	0.1736	0.7335	0.1736	0.1736	0.4893	0.5207	2.9912	1	0.3361	0.1736	0.4036	0.7976	0.1736	0.1736	0.1736	1.1839	2.5615	0.7278	0.2458
308	N-acetylcysteine	Amino Acid	Methionine, Cysteine, SAM and Taurine Metabolism	1586	LC/MS Pos	1107	1792	164.038	616-91-1	12035	C06809	HMDB01890	0.3672	0.8501	0.2538	0.3151	1.1149	0.3867	0.2208	0.2208	0.2208	0.2208	0.2208	0.2208	1.3872	0.2208	0.2547	3.2721	0.241	0.8826	0.2208	1	5.1052	1.9364	0.8727	1.5359	2.5032	0.7895	2.3329	0.9991	0.5541	0.277	1.5078	2.1592	1.3464	1.2663	2.8173	1.8769	1.7046
956	N-acetylgalactosamine	Carbohydrate	Aminosugar Metabolism	2766	GC/MS	1106	1887.4	245.1	14215-68-0	35717	C01074	HMDB00212	0.1928	0.3039	0.1378	0.1378	0.4862	0.1378	0.2539	0.4346	0.1378	2.1095	0.3253	0.3736	0.1378	0.1378	0.2934	0.1378	0.1378	0.1378	0.4375	0.4687	0.7021	2.4948	0.3087	2.4202	0.4705	0.8873	0.1378	1.1837	2.0586	1.335	0.1378	1.4301	1.3266	0.3377	0.9447	0.4691	0.6509
952	N-acetylglucosamine	Carbohydrate	Aminosugar Metabolism	15095	GC/MS	100000281	1903.3	245	7512-17-6	24139	C00140	HMDB00215	0.0856	0.4845	0.0856	0.0856	0.4826	0.0856	0.1908	0.7721	0.0856	1.7026	0.2288	0.3391	0.0856	0.1638	0.2153	0.0856	0.0856	0.0856	0.7919	0.8778	1.0289	1.9722	0.0856	3.4886	0.0856	0.6957	0.6085	0.8243	0.9711	1.6655	0.0856	2.2909	7.0691	0.43	0.8071	0.4752	0.7896
953	N-acetylglucosamine 6-phosphate	Carbohydrate	Aminosugar Metabolism	15107	LC/MS Polar	1213	4114	300.049	102029-88-9	439219	C00357	HMDB02817	0.0585	0.5026	0.3499	0.5128	0.9871	0.3186	0.4118	0.4643	0.7021	1.7146	0.3385	0.5413	0.3719	0.3012	0.3972	0.1668	0.087	0.4979	0.5144	1.8573	2.2934	2.0951	1.931	2.3629	1.0477	1.1495	2.3241	0.9267	0.9398	0.8538	0.6074	1.7218	1.49	1.6244	1.6829	1.0129	0.5969
40	N-acetylglutamate	Amino Acid	Glutamate Metabolism	15720	LC/MS Pos	100000282	1492	190.071	5817-08-03	70914	C00624	HMDB01138	0.0744	0.2551	0.1985	0.2409	0.844	0.3648	0.3324	0.4141	0.4062	0.3899	0.3259	0.3796	0.4578	0.0744	0.2553	0.624	0.2956	0.5	0.3706	1.2464	1.0394	0.7882	1	0.9187	1.3587	1.224	1.455	1.4819	1.4714	1.5734	1.105	1	0.6567	1.5842	10.8964	1.5315	1.3495
[truncated: 181 more rows]
[truncated: 20 more columns]

## Sheet: Pathway Heat Map
	Head and neck squamous cell carcinoma samples
[truncated: 574 more rows]
